# Supplementary material for: A Systematic Review of Plants With Antibacterial Activities: A Taxonomic and Phylogenetic Perspective
Source: Front Pharmacol. 2021 Jan 8;11:586548. doi: 10.3389/fphar.2020.586548 (PMC7821031; doi:10.3389/fphar.2020.586548)
Supplement: Supplementary file 2 [file datasheet1.xlsx]

## Sheet: Plants and Bioactivity
Plant names (full)	Plant genus	Plant species and author epitet	Plant family	Country where the plant species was collected	Tissue	Extraction type (CE: crude ethanolic extract, CEtOAc: crude ethyl acetate extract; CM: crude methanolic extract; CA: crude aqueous, CAcet: crude acetonic extract; CDichl: crude dichlormethanolic extract; CChl: crude chloroformic extract; CBenz: benzene extract; CDiethEth: Diethylether extract; CCyclo: Crude cyclohexane extract; CBuOH: butanol extract; CPEt: Petroleum Ether extract; CHex: crude he…	Organism	Gram Coloration	Test type (IC50 or MIC)	# value	Unit (ug/mL or % v./v.)	Clinicial trials (Y/N)	Reference	Ethnobotanical use for infectious or inflammatory disease (country)	Not Specified	Cardiovascular	Dermatological	Endocrinological	Gastrointestinal	General Health (Immunity and Systemic Infections)	Genitourinary	Gynecology and Andrology	Musculoskeletal	Neurological and Mental Health	Ophthalmological	Oral Health	Otolaryngological and Respiratory
Abelmoschus esculentus (L.) Moench	Abelmoschus	esculentus (L.) Moench	Malvaceae	Cameroon	leaf	CM	Enterobacter aerogenes	-	MIC	256	µg/mL	Y	326	NS	X
Abelmoschus esculentus (L.) Moench	Abelmoschus	esculentus (L.) Moench	Malvaceae	Cameroon	leaf	CM	Staphylococcus aureus	+	MIC	256	µg/mL	Y	463	NS	X
Abies balsamea (L.) Mill.	Abies	balsamea (L.) Mill.	Pinaceae	NS	branch	EO	Staphylococcus aureus	+	MIC	12.5	μL/mL	Y	447	NS	X
Abies balsamea (L.) Mill.	Abies	balsamea (L.) Mill.	Pinaceae	NS	branch	EO	Staphylococcus hyicus	+	MIC	12.5	μL/mL	Y	447	NS	X
Abutilon otocarpum F.Muell.	Abutilon	otocarpum F.Muell.	Malvaceae	Australia	leaf	CE	Campylobacter jejuni	-	MIC	256	µg/mL	N	243	NS	X
Acacia baileyana F.Muell.	Acacia	baileyana F.Muell.	Fabaceae	Australia	leaf	CE	Campylobacter jejuni	-	MIC	128	µg/mL	N	243	NS	X
Acacia burkei Benth.	Acacia	burkei Benth.	Fabaceae	South Africa	bark	CDichl/M	Pseudomonas aeruginosa	-	MIC	250	µg/mL	N	327	NS	X
Acacia burkei Benth.	Acacia	burkei Benth.	Fabaceae	South Africa	bark	CDichl/M	Cutibacterium acnes	+	MIC	380	µg/mL	N	327	NS	X
Acacia burkei Benth.	Acacia	burkei Benth.	Fabaceae	South Africa	bark	CDichl/M	Brevibacterium agri	+	MIC	400	µg/mL	N	327	NS	X
Acacia burkei Benth.	Acacia	burkei Benth.	Fabaceae	South Africa	bark	CA	Brevibacterium agri	+	MIC	500	µg/mL	N	327	NS	X
Acacia burkei Benth.	Acacia	burkei Benth.	Fabaceae	South Africa	bark	CDichl/M	Brevibacterium linens	+	MIC	500	µg/mL	N	327	NS	X
Acacia burkei Benth.	Acacia	burkei Benth.	Fabaceae	South Africa	bark	CA	Cutibacterium acnes	+	MIC	500	µg/mL	N	327	NS	X
Acacia burkei Benth.	Acacia	burkei Benth.	Fabaceae	South Africa	bark	CM/Dichl (1:1)	Shigella flexneri	-	MIC	250	µg/mL	N	452	diarrhea					X
Acacia burkei Benth.	Acacia	burkei Benth.	Fabaceae	South Africa	bark	CM/Dichl (1:1)	Proteus vulgaris	-	MIC	500	µg/mL	N	452	diarrhea					X
Acacia caffra (Thunb.) Willd.	Acacia	caffra (Thunb.) Willd.	Fabaceae	South Africa	bark	CAcet	Staphylococcus aureus	+	MIC	390	µg/mL	N	277	abdominal complaints, cold, fever, mouth and blood purification		X			X	X						X
Acacia caffra (Thunb.) Willd.	Acacia	caffra (Thunb.) Willd.	Fabaceae	South Africa	bark	CA	Staphylococcus aureus	+	MIC	390	µg/mL	N	277	abdominal complaints, cold, fever, mouth and blood purification		X			X	X						X
Acacia cyclops G.Don	Acacia	cyclops G.Don	Fabaceae	Australia	leaf	CE	Campylobacter jejuni	-	MIC	256	µg/mL	N	243	NS	X
Acacia decurrens Willd.	Acacia	decurrens Willd.	Fabaceae	Australia	leaf	CE	Campylobacter jejuni	-	MIC	64	µg/mL	N	243	NS	X
Acacia decurrens Willd.	Acacia	decurrens Willd.	Fabaceae	Australia	leaf	CE	Campylobacter coli	-	MIC	128	µg/mL	N	243	NS	X
Acacia decurrens Willd.	Acacia	decurrens Willd.	Fabaceae	Australia	leaf	CE	Proteus mirabilis	-	MIC	256	µg/mL	N	243	NS	X
Acacia erioloba E.Mey	Acacia	erioloba E.Mey	Fabaceae	South Africa	bark	CDichl	Cutibacterium acnes	+	MIC	200	µg/mL	N	273	wound healing			X
Acacia erioloba E.Mey	Acacia	erioloba E.Mey	Fabaceae	South Africa	leaf	CDichl	Cutibacterium acnes	+	MIC	200	µg/mL	N	273	wound healing			X
Acacia erioloba E.Mey	Acacia	erioloba E.Mey	Fabaceae	South Africa	bark	CA	Cutibacterium acnes	+	MIC	250	µg/mL	N	273	wound healing			X
Acacia erioloba E.Mey	Acacia	erioloba E.Mey	Fabaceae	South Africa	bark	CDichl	Brevibacterium agri	+	MIC	500	µg/mL	N	273	wound healing			X
Acacia erioloba E.Mey	Acacia	erioloba E.Mey	Fabaceae	South Africa	leaf	CDichl	Brevibacterium agri	+	MIC	500	µg/mL	N	273	wound healing			X
Acacia erioloba E.Mey	Acacia	erioloba E.Mey	Fabaceae	South Africa	leaf	CA	Cutibacterium acnes	+	MIC	500	µg/mL	N	273	wound healing			X
Acacia erioloba E.Mey	Acacia	erioloba E.Mey	Fabaceae	South Africa	bark	CDichl	Staphylococcus aureus	+	MIC	500	µg/mL	N	273	wound healing			X
Acacia falcata Willd.	Acacia	falcata Willd.	Fabaceae	Australia (New South Wales)	bark	CE	Staphylococcus aureus (MRSA)	+	MIC	250	µg/mL	N	15	skin complaints			X
Acacia implexa Benth.	Acacia	implexa Benth.	Fabaceae	Australia (New South Wales)	bark	CE	Staphylococcus aureus (MSSA)	+	MIC	125	µg/mL	N	15	skin complaints			X
Acacia implexa Benth.	Acacia	implexa Benth.	Fabaceae	Australia (New South Wales)	bark	CE	Staphylococcus aureus (MRSA)	+	MIC	250	µg/mL	N	15	skin complaints			X
Acacia iteaphylla Benth.	Acacia	iteaphylla Benth.	Fabaceae	Australia	leaf	CE	Campylobacter jejuni	-	MIC	256	µg/mL	N	243	NS	X
Acacia karroo Hayne	Acacia	karroo Hayne	Fabaceae	Portugal	aerial part	CM	Staphylococcus aureus	+	MIC	7.5	µg/mL	N	278	dysentery, diarrhea					X
Acacia karroo Hayne	Acacia	karroo Hayne	Fabaceae	Portugal	aerial part	CHex	Micrococcus luteus	+	MIC	31	µg/mL	N	278	dysentery, diarrhea					X
Acacia karroo Hayne	Acacia	karroo Hayne	Fabaceae	Portugal	aerial part	CEtOAc	Micrococcus luteus	+	MIC	62.5	µg/mL	N	278	dysentery, diarrhea					X
Acacia karroo Hayne	Acacia	karroo Hayne	Fabaceae	Portugal	aerial part	CM	Micrococcus luteus	+	MIC	125	µg/mL	N	278	dysentery, diarrhea					X
Acacia karroo Hayne	Acacia	karroo Hayne	Fabaceae	Portugal	aerial part	CDichl	Pseudomonas aeruginosa	-	MIC	125	µg/mL	N	278	dysentery, diarrhea					X
Acacia karroo Hayne	Acacia	karroo Hayne	Fabaceae	Portugal	aerial part	CEtOAc	Pseudomonas aeruginosa	-	MIC	125	µg/mL	N	278	dysentery, diarrhea					X
Acacia karroo Hayne	Acacia	karroo Hayne	Fabaceae	Portugal	aerial part	CM	Pseudomonas aeruginosa	-	MIC	125	µg/mL	N	278	dysentery, diarrhea					X
Acacia karroo Hayne	Acacia	karroo Hayne	Fabaceae	Portugal	aerial part	CHex	Staphylococcus aureus	+	MIC	125	µg/mL	N	278	dysentery, diarrhea					X
Acacia karroo Hayne	Acacia	karroo Hayne	Fabaceae	Portugal	aerial part	CDichl	Staphylococcus aureus	+	MIC	125	µg/mL	N	278	dysentery, diarrhea					X
Acacia karroo Hayne	Acacia	karroo Hayne	Fabaceae	Portugal	aerial part	CEtOAc	Staphylococcus aureus	+	MIC	125	µg/mL	N	278	dysentery, diarrhea					X
Acacia karroo Hayne	Acacia	karroo Hayne	Fabaceae	Portugal	aerial part	CHex	Enterococcus faecalis	+	MIC	250	µg/mL	N	278	dysentery, diarrhea					X
Acacia karroo Hayne	Acacia	karroo Hayne	Fabaceae	Portugal	aerial part	CDichl	Enterococcus faecalis	+	MIC	250	µg/mL	N	278	dysentery, diarrhea					X
Acacia karroo Hayne	Acacia	karroo Hayne	Fabaceae	Portugal	aerial part	CEtOAc	Enterococcus faecalis	+	MIC	250	µg/mL	N	278	dysentery, diarrhea					X
Acacia karroo Hayne	Acacia	karroo Hayne	Fabaceae	Portugal	aerial part	CM	Enterococcus faecalis	+	MIC	250	µg/mL	N	278	dysentery, diarrhea					X
Acacia karroo Hayne	Acacia	karroo Hayne	Fabaceae	South Africa	stem	CM	Klebsiella pneumoniae (Ampicillin-R)	-	MIC	78.12	µg/mL	N	333	oral thrush, diarrhea, dysentery, colds, bronchitis, fever, leprosy			X		X	X						X	X
Acacia karroo Hayne	Acacia	karroo Hayne	Fabaceae	South Africa	stem	CM	Staphylococcus aureus (MRSA)	+	MIC	78.12	µg/mL	N	333	oral thrush, diarrhea, dysentery, colds, bronchitis, fever, leprosy			X		X	X						X	X
Acacia karroo Hayne	Acacia	karroo Hayne	Fabaceae	South Africa	leaf	CM	Escherichia coli (Beta-lactamase +)	-	MIC	156.25	µg/mL	N	333	oral thrush, diarrhea, dysentery, colds, bronchitis, fever, leprosy			X		X	X						X	X
Acacia karroo Hayne	Acacia	karroo Hayne	Fabaceae	South Africa	stem	CM	Escherichia coli (Beta-lactamase +)	-	MIC	156.25	µg/mL	N	333	oral thrush, diarrhea, dysentery, colds, bronchitis, fever, leprosy			X		X	X						X	X
Acacia karroo Hayne	Acacia	karroo Hayne	Fabaceae	South Africa	leaf	CM	Klebsiella pneumoniae (Ampicillin-R)	-	MIC	156.25	µg/mL	N	333	oral thrush, diarrhea, dysentery, colds, bronchitis, fever, leprosy			X		X	X						X	X
Acacia karroo Hayne	Acacia	karroo Hayne	Fabaceae	South Africa	leaf	CM	Pseudomonas aeruginosa (Carbenicillin-R)	-	MIC	156.25	µg/mL	N	333	oral thrush, diarrhea, dysentery, colds, bronchitis, fever, leprosy			X		X	X						X	X
Acacia karroo Hayne	Acacia	karroo Hayne	Fabaceae	South Africa	stem	CM	Pseudomonas aeruginosa (Carbenicillin-R)	-	MIC	156.25	µg/mL	N	333	oral thrush, diarrhea, dysentery, colds, bronchitis, fever, leprosy			X		X	X						X	X
Acacia karroo Hayne	Acacia	karroo Hayne	Fabaceae	South Africa	leaf	CM	Staphylococcus aureus (MRSA)	+	MIC	156.25	µg/mL	N	333	oral thrush, diarrhea, dysentery, colds, bronchitis, fever, leprosy			X		X	X						X	X
Acacia karroo Hayne	Acacia	karroo Hayne	Fabaceae	South Africa	leaf	CM	Citrobacter freundii (chloramphenicol-R)	-	MIC	312.5	µg/mL	N	333	oral thrush, diarrhea, dysentery, colds, bronchitis, fever, leprosy			X		X	X						X	X
Acacia karroo Hayne	Acacia	karroo Hayne	Fabaceae	South Africa	stem	CM	Citrobacter freundii (chloramphenicol-R)	-	MIC	312.5	µg/mL	N	333	oral thrush, diarrhea, dysentery, colds, bronchitis, fever, leprosy			X		X	X						X	X
Acacia ligulata A.Cunn. ex Benth.	Acacia	ligulata A.Cunn. ex Benth.	Fabaceae	Australia	bark	CE	Streptococcus pyogenes	+	MIC	62.5	µg/mL	N	212	Treats coughs and colds						X							X
Acacia loderi Maiden	Acacia	loderi Maiden	Fabaceae	Australia	leaf	CE	Campylobacter jejuni	-	MIC	64	µg/mL	N	243	NS	X
Acacia loderi Maiden	Acacia	loderi Maiden	Fabaceae	Australia	leaf	CE	Campylobacter coli	-	MIC	128	µg/mL	N	243	NS	X
Acacia mearnsii De Wild.	Acacia	mearnsii De Wild.	Fabaceae	South Africa	bark	CAcet	Salmonella typhimurium	-	MIC	39	µg/mL	N	70	antitumor, enema, stomach pain					X
Acacia mearnsii De Wild.	Acacia	mearnsii De Wild.	Fabaceae	South Africa	bark	CAcet	Shigella flexneri	-	MIC	312	µg/mL	N	70	antitumor, enema, stomach pain					X
Acacia mearnsii De Wild.	Acacia	mearnsii De Wild.	Fabaceae	South Africa	bark	CAcet	Staphylococcus aureus	+	MIC	312	µg/mL	N	70	antitumor, enema, stomach pain					X
Acacia mearnsii De Wild.	Acacia	mearnsii De Wild.	Fabaceae	Australia	leaf	CE	Campylobacter jejuni	-	MIC	128	µg/mL	N	243	NS	X
Acacia mearnsii De Wild.	Acacia	mearnsii De Wild.	Fabaceae	South Africa	bark	CM	Proteus vulgaris	-	MIC	39.1	µg/mL	N	348	NS	X
Acacia mearnsii De Wild.	Acacia	mearnsii De Wild.	Fabaceae	South Africa	bark	CM	Shigella flexneri	-	MIC	39.1	µg/mL	N	348	NS	X
Acacia mearnsii De Wild.	Acacia	mearnsii De Wild.	Fabaceae	South Africa	bark	CM	Micrococcus luteus	+	MIC	78	µg/mL	N	348	NS	X
Acacia mearnsii De Wild.	Acacia	mearnsii De Wild.	Fabaceae	South Africa	bark	CM	Enterococcus faecalis	+	MIC	156	µg/mL	N	348	NS	X
Acacia mearnsii De Wild.	Acacia	mearnsii De Wild.	Fabaceae	South Africa	bark	CM	Acinetobacter calcoaceticus	-	MIC	156.2	µg/mL	N	348	NS	X
Acacia mearnsii De Wild.	Acacia	mearnsii De Wild.	Fabaceae	South Africa	bark	CM	Klebsiella pneumoniae	-	MIC	156.3	µg/mL	N	348	NS	X
Acacia mearnsii De Wild.	Acacia	mearnsii De Wild.	Fabaceae	South Africa	bark	CM	Staphylococcus aureus	+	MIC	156.3	µg/mL	N	348	NS	X
Acacia mearnsii De Wild.	Acacia	mearnsii De Wild.	Fabaceae	South Africa	bark	CM	Bacillus pumilus	+	MIC	312.5	µg/mL	N	348	NS	X
Acacia mearnsii De Wild.	Acacia	mearnsii De Wild.	Fabaceae	South Africa	bark	CM	Escherichia coli	-	MIC	312.5	µg/mL	N	348	NS	X
Acacia mearnsii De Wild.	Acacia	mearnsii De Wild.	Fabaceae	South Africa	bark	CM	Salmonella typhi	-	MIC	312.5	µg/mL	N	348	NS	X
Acacia microbotrya Benth.	Acacia	microbotrya Benth.	Fabaceae	Australia	leaf	CE	Campylobacter jejuni	-	MIC	256	µg/mL	N	243	NS	X
Acacia murrayana Benth.	Acacia	murrayana Benth.	Fabaceae	Australia	leaf	CE	Campylobacter jejuni	-	MIC	256	µg/mL	N	243	NS	X
Acacia nilotica (L.) Delile	Acacia	nilotica (L.) Delile	Fabaceae	Pakistan	twig	CM	Prevotella intermedia	-	MIC	156	µg/mL	N	39	Muliple types of infections						X
Acacia nilotica (L.) Delile	Acacia	nilotica (L.) Delile	Fabaceae	Pakistan	twig	CA	Prevotella intermedia	-	MIC	313	µg/mL	N	39	Muliple types of infections						X
Acacia nilotica (L.) Delile	Acacia	nilotica (L.) Delile	Fabaceae	Pakistan	twig	CAcet	Prevotella intermedia	-	MIC	313	µg/mL	N	39	Muliple types of infections						X
Acacia nilotica (L.) Delile	Acacia	nilotica (L.) Delile	Fabaceae	Pakistan	twig	CA	Streptococcus mitis	+	MIC	313	µg/mL	N	39	Muliple types of infections						X
Acacia nilotica (L.) Delile	Acacia	nilotica (L.) Delile	Fabaceae	Pakistan	twig	CM	Streptococcus mitis	+	MIC	313	µg/mL	N	39	Muliple types of infections						X
Acacia nilotica (L.) Delile	Acacia	nilotica (L.) Delile	Fabaceae	Pakistan	twig	CA	Streptococcus mutans	+	MIC	313	µg/mL	N	39	Muliple types of infections						X
Acacia nilotica (L.) Delile	Acacia	nilotica (L.) Delile	Fabaceae	Pakistan	twig	CAcet	Streptococcus mutans	+	MIC	313	µg/mL	N	39	Muliple types of infections						X
Acacia nilotica (L.) Delile	Acacia	nilotica (L.) Delile	Fabaceae	Pakistan	twig	CM	Streptococcus mutans	+	MIC	313	µg/mL	N	39	Muliple types of infections						X
Acacia nilotica (L.) Delile	Acacia	nilotica (L.) Delile	Fabaceae	India	leaf	CM	Pseudomonas aeruginosa	-	MIC	62.5	µg/mL	N	49	cure leucoderma			X
Acacia nilotica (L.) Delile	Acacia	nilotica (L.) Delile	Fabaceae	India	leaf	CA	Pseudomonas aeruginosa	-	MIC	62.5	µg/mL	N	49	cure leucoderma			X
Acacia nilotica (L.) Delile	Acacia	nilotica (L.) Delile	Fabaceae	India	leaf	CM	Proteus vulgaris	-	MIC	250	µg/mL	N	49	cure leucoderma			X
Acacia nilotica (L.) Delile	Acacia	nilotica (L.) Delile	Fabaceae	India	leaf	CA	Staphylococcus aureus	+	MIC	250	µg/mL	N	49	cure leucoderma			X
Acacia nilotica (L.) Delile	Acacia	nilotica (L.) Delile	Fabaceae	India	leaf	CM	Staphylococcus aureus	+	MIC	250	µg/mL	N	49	cure leucoderma			X
Acacia podalyriifolia G.Don	Acacia	podalyriifolia G.Don	Fabaceae	Australia	leaf	CE	Campylobacter jejuni	-	MIC	64	µg/mL	N	243	NS	X
Acacia podalyriifolia G.Don	Acacia	podalyriifolia G.Don	Fabaceae	Australia	leaf	CE	Campylobacter coli	-	MIC	128	µg/mL	N	243	NS	X
Acacia pycnantha Benth.	Acacia	pycnantha Benth.	Fabaceae	Australia	leaf	CE	Campylobacter jejuni	-	MIC	64	µg/mL	N	243	NS	X
Acacia pycnantha Benth.	Acacia	pycnantha Benth.	Fabaceae	Australia	leaf	CE	Campylobacter coli	-	MIC	256	µg/mL	N	243	NS	X
Acacia saligna (Labill.) Wendl.	Acacia	saligna (Labill.) Wendl.	Fabaceae	Australia	leaf	CE	Campylobacter jejuni	-	MIC	128	µg/mL	N	243	NS	X
Acacia saligna (Labill.) Wendl.	Acacia	saligna (Labill.) Wendl.	Fabaceae	Australia	leaf	CE	Campylobacter coli	-	MIC	256	µg/mL	N	243	NS	X
Acantholippia salsoloides Griseb.	Acantholippia	salsoloides Griseb.	Verbenaceae	Argentina	aerial part	CE	Staphylococcus aureus	+	MIC	300	µg/mL	N	88	digestive infections, diarrhea					X
Acanthospermum glabratum (DC.) Wild	Acanthospermum	glabratum (DC.) Wild	Asteraceae	South Africa	whole plant	CM/Dichl (1:1)	Shigella flexneri	-	MIC	440	µg/mL	N	452	diarrhea					X
Achillea biebersteinii Afan.	Achillea	biebersteinii Afan.	Asteraceae	Saudi Arabia	aerial part	CM	Escherichia coli	-	MIC	128	µg/mL	N	238	NS	X
Achillea biebersteinii Afan.	Achillea	biebersteinii Afan.	Asteraceae	Saudi Arabia	aerial part	CM	Klebsiella pneumoniae	-	MIC	128	µg/mL	N	238	NS	X
Achillea biebersteinii Afan.	Achillea	biebersteinii Afan.	Asteraceae	Saudi Arabia	aerial part	CM	Enterobacter aerogenes	-	MIC	256	µg/mL	N	238	NS	X
Achillea santolinoides subsp. wilhelmsii (K.Koch) Greuter	Achillea	santolinoides subsp. wilhelmsii (K.Koch) Greuter	Asteraceae	Iran (Golmakan, Khorasan Razavi)	aerial part	EO	Escherichia coli	-	MIC	500	µg/mL	N	405	sedative, anti-helminthic, anti-inflammation						X				X
Achyrocline satureioides (Lam.) DC.	Achyrocline	satureioides (Lam.) DC.	Asteraceae	Argentina	aerial part	CHex	Paenibacillus larvae	+	MIC	16	µg/mL	N	187	NS	X
Achyrocline satureioides (Lam.) DC.	Achyrocline	satureioides (Lam.) DC.	Asteraceae	Argentina	aerial part	CBenz	Paenibacillus larvae	+	MIC	63	µg/mL	N	187	NS	X
Achyrocline satureioides (Lam.) DC.	Achyrocline	satureioides (Lam.) DC.	Asteraceae	Argentina	aerial part	CDiethEth	Paenibacillus larvae	+	MIC	500	µg/mL	N	187	NS	X
Acokanthera oppositifolia (Lam.) Codd	Acokanthera	oppositifolia (Lam.) Codd	Apocynaceae	South Africa	leaf	CDichl	Brevibacterium agri	+	MIC	500	µg/mL	N	273	wound healing or dressing			X
Acokanthera oppositifolia (Lam.) Codd	Acokanthera	oppositifolia (Lam.) Codd	Apocynaceae	South Africa	stem	CM	Pseudomonas aeruginosa (Carbenicillin-R)	-	MIC	312.5	µg/mL	N	333	snakebites, septicemia, toothache			X
Acokanthera oppositifolia (Lam.) Codd	Acokanthera	oppositifolia (Lam.) Codd	Apocynaceae	South Africa	leaf	CM	Staphylococcus aureus (MRSA)	+	MIC	312.5	µg/mL	N	333	snakebites, septicemia, toothache			X
Acokanthera oppositifolia (Lam.) Codd	Acokanthera	oppositifolia (Lam.) Codd	Apocynaceae	South Africa	stem	CM	Staphylococcus aureus (MRSA)	+	MIC	312.5	µg/mL	N	333	snakebites, septicemia, toothache			X
Acronychia pedunculata (L.) Miq.	Acronychia	pedunculata (L.) Miq.	Rutaceae	Indonesia	leaf	CE	Bacillus subtilis	+	MIC	250	µg/mL	N	3	NS	X
Acronychia pedunculata (L.) Miq.	Acronychia	pedunculata (L.) Miq.	Rutaceae	Indonesia	leaf	CE	Escherichia coli	-	MIC	500	µg/mL	N	3	NS	X
Adansonia digitata L.	Adansonia	digitata L.	Malvaceae	Cameroon	leaf	CM	Enterobacter aerogenes	-	MIC	128	µg/mL	Y	137	analgesic, anti-diarrheal, smallpox, rubella, antipyretic, fever, dysentery, anti-inflammatory					X	X
Adansonia digitata L.	Adansonia	digitata L.	Malvaceae	Cameroon	leaf	CM	Escherichia coli	-	MIC	128	µg/mL	Y	137	analgesic, anti-diarrheal, smallpox, rubella, antipyretic, fever, dysentery, anti-inflammatory					X	X
Adansonia digitata L.	Adansonia	digitata L.	Malvaceae	Cameroon	leaf	CM	Klebsiella pneumoniae	-	MIC	128	µg/mL	Y	137	analgesic, anti-diarrheal, smallpox, rubella, antipyretic, fever, dysentery, anti-inflammatory					X	X
Adansonia digitata L.	Adansonia	digitata L.	Malvaceae	Cameroon	fruit	CM	Enterobacter aerogenes	-	MIC	256	µg/mL	N	400	Febrifuge, antidysentery, antioxydant, analgesic, antidiarrheal					X	X
Adansonia digitata L.	Adansonia	digitata L.	Malvaceae	Cameroon	fruit	CM	Providencia stuartii	-	MIC	256	µg/mL	N	400	Febrifuge, antidysentery, antioxydant, analgesic, antidiarrheal					X	X
Adenanthera pavonina L.	Adenanthera	pavonina L.	Fabaceae	Thailand	leaf	CA	Campylobacter jejuni	-	MIC	62.5	µg/mL	N	133	diarrhea, dystentry					X
Aframomum alboviolaceum (Ridl.) K. Schum.	Aframomum	alboviolaceum (Ridl.) K. Schum.	Zingiberaceae	Cameroon	leaf	CM	Enterobacter aerogenes	-	MIC	256	µg/mL	N	137	anthelmintic, fever, antiparasitic					X	X
Aframomum kayserianum (K.Schum.) K.Schum.	Aframomum	kayserianum (K.Schum.) K.Schum.	Zingiberaceae	Cameroon	fruit	CM	Enterobacter aerogenes	-	MIC	64	µg/mL	N	400	mumps, dysmenorrhea, vermifuge					X	X		X
Aframomum polyanthum (K. Schum.) K. Schum.	Aframomum	polyanthum (K. Schum.) K. Schum.	Zingiberaceae	Cameroon	fruit	CM	Enterobacter aerogenes	-	MIC	32	µg/mL	N	137	NS	X
Aframomum polyanthum (K. Schum.) K. Schum.	Aframomum	polyanthum (K. Schum.) K. Schum.	Zingiberaceae	Cameroon	leaf	CM	Klebsiella pneumoniae	-	MIC	256	µg/mL	N	137	NS	X
Ageratum conyzoides (L.) L.	Ageratum	conyzoides (L.) L.	Asteraceae	India	whole plant	CM	Shigella flexneri	-	MIC	500	µg/mL	N	358	NS	X
Ageratum conyzoides (L.) L.	Ageratum	conyzoides (L.) L.	Asteraceae	India	whole plant	CM	Staphylococcus aureus	+	MIC	500	µg/mL	N	358	NS	X
Ageratum conyzoides (L.) L.	Ageratum	conyzoides (L.) L.	Asteraceae	Cameroon	whole plant	CM	Enterobacter aerogenes	-	MIC	256	µg/mL	N	459	NS	X
Ageratum conyzoides (L.) L.	Ageratum	conyzoides (L.) L.	Asteraceae	Cameroon	whole plant	CM	Escherichia coli	-	MIC	256	µg/mL	N	459	NS	X
Ageratum conyzoides (L.) L.	Ageratum	conyzoides (L.) L.	Asteraceae	Cameroon	whole plant	CM	Providencia stuartii	-	MIC	256	µg/mL	N	459	NS	X
Ageratum conyzoides (L.) L.	Ageratum	conyzoides (L.) L.	Asteraceae	Cameroon	whole plant	CM	Staphylococcus aureus (MRSA)	+	MIC	256	µg/mL	N	459	NS	X
Aglaia odorata Lour.	Aglaia	odorata Lour.	Meliaceae	Vietnam	leaf	CM	Bacillus cereus	+	MIC	500	µg/mL	N	462	fever, jaundice, asthma, scabies			X		X	X							X
Aglaia odorata Lour.	Aglaia	odorata Lour.	Meliaceae	Vietnam	leaf	CM	Staphylococcus aureus	+	MIC	500	µg/mL	N	462	fever, jaundice, asthma, scabies			X		X	X							X
Agonis flexuosa (Muhl. ex Willd.) Sweet	Agonis	flexuosa (Muhl. ex Willd.) Sweet	Myrtaceae	Australia	leaf	CE	Campylobacter jejuni	-	MIC	256	µg/mL	N	243	NS	X
Agrimonia eupatoria L.	Agrimonia	eupatoria L.	Rosaceae	Armenia	whole plant	CM	Bacillus subtilis	+	MIC	128	µg/mL	N	182	Hepatitis, nephritis, stomatitis, yellow fever, purulent wounds			X		X		X
Agrimonia eupatoria L.	Agrimonia	eupatoria L.	Rosaceae	Armenia	whole plant	CAcet	Bacillus subtilis	+	MIC	128	µg/mL	N	182	Hepatitis, nephritis, stomatitis, yellow fever, purulent wounds			X		X		X
Agrimonia eupatoria L.	Agrimonia	eupatoria L.	Rosaceae	Armenia	whole plant	CAcet	Pseudomonas aeruginosa	-	MIC	128	µg/mL	N	182	Hepatitis, nephritis, stomatitis, yellow fever, purulent wounds			X		X		X
Agrimonia eupatoria L.	Agrimonia	eupatoria L.	Rosaceae	Armenia	whole plant	CHex	Pseudomonas aeruginosa	-	MIC	128	µg/mL	N	182	Hepatitis, nephritis, stomatitis, yellow fever, purulent wounds			X		X		X
Agrimonia eupatoria L.	Agrimonia	eupatoria L.	Rosaceae	Armenia	whole plant	CChl	Bacillus subtilis	+	MIC	256	µg/mL	N	182	Hepatitis, nephritis, stomatitis, yellow fever, purulent wounds			X		X		X
Agrimonia eupatoria L.	Agrimonia	eupatoria L.	Rosaceae	Armenia	whole plant	CHex	Bacillus subtilis	+	MIC	256	µg/mL	N	182	Hepatitis, nephritis, stomatitis, yellow fever, purulent wounds			X		X		X
Agrimonia eupatoria L.	Agrimonia	eupatoria L.	Rosaceae	Armenia	whole plant	CM	Pseudomonas aeruginosa	-	MIC	256	µg/mL	N	182	Hepatitis, nephritis, stomatitis, yellow fever, purulent wounds			X		X		X
Agrimonia eupatoria L.	Agrimonia	eupatoria L.	Rosaceae	Armenia	whole plant	CM	Staphylococcus aureus	+	MIC	256	µg/mL	N	182	Hepatitis, nephritis, stomatitis, yellow fever, purulent wounds			X		X		X
Agrimonia eupatoria L.	Agrimonia	eupatoria L.	Rosaceae	Armenia	whole plant	CChl	Staphylococcus aureus	+	MIC	256	µg/mL	N	182	Hepatitis, nephritis, stomatitis, yellow fever, purulent wounds			X		X		X
Agrimonia eupatoria L.	Agrimonia	eupatoria L.	Rosaceae	Armenia	whole plant	CAcet	Staphylococcus aureus	+	MIC	256	µg/mL	N	182	Hepatitis, nephritis, stomatitis, yellow fever, purulent wounds			X		X		X
Agrimonia eupatoria L.	Agrimonia	eupatoria L.	Rosaceae	Armenia	whole plant	CHex	Staphylococcus aureus	+	MIC	256	µg/mL	N	182	Hepatitis, nephritis, stomatitis, yellow fever, purulent wounds			X		X		X
Agrimonia eupatoria L.	Agrimonia	eupatoria L.	Rosaceae	Serbia	aerial part	CAcet	Staphylococcus aureus	+	MIC	120	µg/mL	Y	320	Digestive tract disorders					X
Agrimonia eupatoria L.	Agrimonia	eupatoria L.	Rosaceae	Serbia	aerial part	CAcet	Bacillus cereus	+	MIC	310	µg/mL	Y	320	Digestive tract disorders					X
Agrimonia eupatoria L.	Agrimonia	eupatoria L.	Rosaceae	Serbia	aerial part	CAcet	Bacillus subtilis	+	MIC	310	µg/mL	Y	320	Digestive tract disorders					X
Agrimonia eupatoria L.	Agrimonia	eupatoria L.	Rosaceae	Serbia	aerial part	CDiethEth	Staphylococcus aureus	+	MIC	310	µg/mL	Y	320	Digestive tract disorders					X
Ajuga chamaecistus subsp. scoparia (Boiss.) Rech.f.	Ajuga	chamaecistus subsp. scoparia (Boiss.) Rech.f.	Lamiaceae	Iran	aerial part	EO	Escherichia coli	-	MIC	12.5	μL/mL	N	299	joint pain, gout, asthma, diabetes, malaria, ulcers diarrhea and jaundice				X	X	X			X				X
Ajuga chamaecistus subsp. scoparia (Boiss.) Rech.f.	Ajuga	chamaecistus subsp. scoparia (Boiss.) Rech.f.	Lamiaceae	Iran	aerial part	EO	Staphylococcus aureus	+	MIC	12.5	μL/mL	N	299	joint pain, gout, asthma, diabetes, malaria, ulcers diarrhea and jaundice				X	X	X			X				X
Albizia adianthifolia (Schum.) W.Wight	Albizia	adianthifolia (Schum.) W.Wight	Fabaceae	South Africa	bark	CA	Ureaplasma urealyticum	-	MIC	250	µg/mL	N	323	Gonnorhoeaceae treatment								X
Albizia adianthifolia (Schum.) W.Wight	Albizia	adianthifolia (Schum.) W.Wight	Fabaceae	South Africa	bark	CM/Dichl	Ureaplasma urealyticum	-	MIC	250	µg/mL	N	323	Gonnorhoeaceae treatment								X
Albizia adianthifolia (Schum.) W.Wight	Albizia	adianthifolia (Schum.) W.Wight	Fabaceae	South Africa	bark	CDichl/M	Brevibacterium agri	+	MIC	50	µg/mL	N	327	NS	X
Albizia adianthifolia (Schum.) W.Wight	Albizia	adianthifolia (Schum.) W.Wight	Fabaceae	Cameroon	bark	CM	Enterobacter aerogenes	-	MIC	128	µg/mL	N	432	Treatment skin diseases, bronchitis, inflamed eyes, tapeworm, headaches and sinusitis			X			X					X		X
Albizia adianthifolia (Schum.) W.Wight	Albizia	adianthifolia (Schum.) W.Wight	Fabaceae	Cameroon	root	CM	Enterobacter aerogenes	-	MIC	128	µg/mL	N	432	Treatment skin diseases, bronchitis, inflamed eyes, tapeworm, headaches and sinusitis			X			X					X		X
Albizia adianthifolia (Schum.) W.Wight	Albizia	adianthifolia (Schum.) W.Wight	Fabaceae	Cameroon	bark	CM	Escherichia coli	-	MIC	128	µg/mL	N	432	Treatment skin diseases, bronchitis, inflamed eyes, tapeworm, headaches and sinusitis			X			X					X		X
Albizia adianthifolia (Schum.) W.Wight	Albizia	adianthifolia (Schum.) W.Wight	Fabaceae	Cameroon	root	CM	Escherichia coli	-	MIC	128	µg/mL	N	432	Treatment skin diseases, bronchitis, inflamed eyes, tapeworm, headaches and sinusitis			X			X					X		X
Albizia adianthifolia (Schum.) W.Wight	Albizia	adianthifolia (Schum.) W.Wight	Fabaceae	Cameroon	bark	CM	Klebsiella pneumoniae	-	MIC	128	µg/mL	N	432	Treatment skin diseases, bronchitis, inflamed eyes, tapeworm, headaches and sinusitis			X			X					X		X
Albizia adianthifolia (Schum.) W.Wight	Albizia	adianthifolia (Schum.) W.Wight	Fabaceae	Cameroon	root	CM	Klebsiella pneumoniae	-	MIC	128	µg/mL	N	432	Treatment skin diseases, bronchitis, inflamed eyes, tapeworm, headaches and sinusitis			X			X					X		X
Albizia adianthifolia (Schum.) W.Wight	Albizia	adianthifolia (Schum.) W.Wight	Fabaceae	Cameroon	root	CM	Pseudomonas aeruginosa	-	MIC	128	µg/mL	N	432	Treatment skin diseases, bronchitis, inflamed eyes, tapeworm, headaches and sinusitis			X			X					X		X
Albizia adianthifolia (Schum.) W.Wight	Albizia	adianthifolia (Schum.) W.Wight	Fabaceae	Cameroon	bark	CM	Pseudomonas aeruginosa	-	MIC	256	µg/mL	N	432	Treatment skin diseases, bronchitis, inflamed eyes, tapeworm, headaches and sinusitis			X			X					X		X
Albizia coriaria Oliv.	Albizia	coriaria Oliv.	Fabaceae	Kenya	stem bark	CM	Mycoplasma mycoides	-	MIC	130	µg/mL	N	220	Livestock respiratory diseases													X
Albizia gummifera (J.F.Gmel.) C.A.Sm.	Albizia	gummifera (J.F.Gmel.) C.A.Sm.	Fabaceae	Cameroon	leaf	CM	Escherichia coli	-	MIC	128	µg/mL	N	435	diarrhea, cough, nervous disease, syphilis, bacterial infection,skin disease, malaria, stomach pain					X								X
Albizia gummifera (J.F.Gmel.) C.A.Sm.	Albizia	gummifera (J.F.Gmel.) C.A.Sm.	Fabaceae	Cameroon	leaf	CM	Salmonella typhi	-	MIC	128	µg/mL	N	435	diarrhea, cough, nervous disease, syphilis, bacterial infection,skin disease, malaria, stomach pain			X		X	X	X			X			X
Albizia gummifera (J.F.Gmel.) C.A.Sm.	Albizia	gummifera (J.F.Gmel.) C.A.Sm.	Fabaceae	Cameroon	leaf	CM	Bacillus cereus	+	MIC	256	µg/mL	N	435	diarrhea, cough, nervous disease, syphilis, bacterial infection,skin disease, malaria, stomach pain			X		X	X	X			X			X
Albizia gummifera (J.F.Gmel.) C.A.Sm.	Albizia	gummifera (J.F.Gmel.) C.A.Sm.	Fabaceae	Cameroon	leaf	CM	Shigella flexneri	-	MIC	256	µg/mL	N	435	diarrhea, cough, nervous disease, syphilis, bacterial infection,skin disease, malaria, stomach pain			X		X	X	X			X			X
Albizia gummifera (J.F.Gmel.) C.A.Sm.	Albizia	gummifera (J.F.Gmel.) C.A.Sm.	Fabaceae	Cameroon	leaf	CM	Staphylococcus aureus	+	MIC	256	µg/mL	N	435	diarrhea, cough, nervous disease, syphilis, bacterial infection,skin disease, malaria, stomach pain			X		X	X	X			X			X
Albizia gummifera (J.F.Gmel.) C.A.Sm.	Albizia	gummifera (J.F.Gmel.) C.A.Sm.	Fabaceae	Ethiopia	bark	CM	Streptococcus dysgalactiae	+	MIC	10	µg/mL	N	437	NS	X
Albizia gummifera (J.F.Gmel.) C.A.Sm.	Albizia	gummifera (J.F.Gmel.) C.A.Sm.	Fabaceae	Ethiopia	bark	CM	Enterococcus gallinarum	+	MIC	100	µg/mL	N	437	NS	X
Albizia myriophylla Benth.	Albizia	myriophylla Benth.	Fabaceae	Thailand	wood	CE	Streptococcus mutans	+	MIC	3.9	µg/mL	N	216	antitussive, expectorant, demulcent, tonic					X								X
Albizia myriophylla Benth.	Albizia	myriophylla Benth.	Fabaceae	Thailand	wood	Fr.	Streptococcus mutans	+	MIC	2	µg/mL	N	216	NS	X
Albizia myriophylla Benth.	Albizia	myriophylla Benth.	Fabaceae	Thailand	wood	CE	Streptococcus mutans	+	MIC	4	µg/mL	N	216	NS	X
Albizia myriophylla Benth.	Albizia	myriophylla Benth.	Fabaceae	Thailand	wood	Fr.	Streptococcus mutans	+	MIC	4	µg/mL	N	216	NS	X
Albizia myriophylla Benth.	Albizia	myriophylla Benth.	Fabaceae	Thailand	wood	Fr.	Streptococcus mutans	+	MIC	16	µg/mL	N	216	NS	X
Albizia myriophylla Benth.	Albizia	myriophylla Benth.	Fabaceae	Thailand	wood	Fr.	Streptococcus mutans	+	MIC	250	µg/mL	N	216	NS	X
Albizia myriophylla Benth.	Albizia	myriophylla Benth.	Fabaceae	Thailand	wood	CE	Streptococcus mutans	+	MIC	500	µg/mL	N	216	NS	X
Alcea rosea L.	Alcea	rosea L.	Malvaceae	Iran	flower	CM	Staphylococcus epidermidis	+	MIC	312	µg/mL	N	4	respiratory and digestive discomfort					X								X
Alchornea cordifolia (Schumach. & Thonn.) Müll.Arg.	Alchornea	cordifolia (Schumach. & Thonn.) Müll.Arg.	Euphorbiaceae	Ghana	leaf	CHex	Mycobacterium smegmatis	+	MIC	250	µg/mL	N	444	Buruli ulcer, wound			X
Alchornea floribunda Müll. Arg.	Alchornea	floribunda Müll. Arg.	Euphorbiaceae	Cameroon	root	CChl	Staphylococcus aureus	+	MIC	50	µg/mL	N	415	treat urinary, respiratory and intestinal problems					X		X						X
Alchornea floribunda Müll. Arg.	Alchornea	floribunda Müll. Arg.	Euphorbiaceae	Cameroon	leaf	CE	Staphylococcus aureus	+	MIC	50	µg/mL	N	415	treat urinary, respiratory and intestinal problems					X		X						X
Alchornea floribunda Müll. Arg.	Alchornea	floribunda Müll. Arg.	Euphorbiaceae	Cameroon	root	CEtOAc	Staphylococcus aureus	+	MIC	50	µg/mL	N	415	treat urinary, respiratory and intestinal problems					X		X						X
Alchornea floribunda Müll. Arg.	Alchornea	floribunda Müll. Arg.	Euphorbiaceae	Cameroon	leaf	CEtOAc	Staphylococcus aureus	+	MIC	50	µg/mL	N	415	treat urinary, respiratory and intestinal problems					X		X						X
Alchornea floribunda Müll. Arg.	Alchornea	floribunda Müll. Arg.	Euphorbiaceae	Cameroon	stem	CE	Klebsiella pneumoniae	-	MIC	63	µg/mL	N	415	treat urinary, respiratory and intestinal problems					X		X						X
Alchornea floribunda Müll. Arg.	Alchornea	floribunda Müll. Arg.	Euphorbiaceae	Cameroon	leaf	CE	Klebsiella pneumoniae	-	MIC	63	µg/mL	N	415	treat urinary, respiratory and intestinal problems					X		X						X
Alchornea floribunda Müll. Arg.	Alchornea	floribunda Müll. Arg.	Euphorbiaceae	Cameroon	stem	CEtOAc	Klebsiella pneumoniae	-	MIC	63	µg/mL	N	415	treat urinary, respiratory and intestinal problems					X		X						X
Alchornea floribunda Müll. Arg.	Alchornea	floribunda Müll. Arg.	Euphorbiaceae	Cameroon	stem	CM	Klebsiella pneumoniae	-	MIC	63	µg/mL	N	415	treat urinary, respiratory and intestinal problems					X		X						X
Alchornea floribunda Müll. Arg.	Alchornea	floribunda Müll. Arg.	Euphorbiaceae	Cameroon	leaf	CM	Klebsiella pneumoniae	-	MIC	63	µg/mL	N	415	treat urinary, respiratory and intestinal problems					X		X						X
Alchornea floribunda Müll. Arg.	Alchornea	floribunda Müll. Arg.	Euphorbiaceae	Cameroon	stem	CE	Staphylococcus saprophyticus	+	MIC	63	µg/mL	N	415	treat urinary, respiratory and intestinal problems					X		X						X
Alchornea floribunda Müll. Arg.	Alchornea	floribunda Müll. Arg.	Euphorbiaceae	Cameroon	leaf	CE	Staphylococcus saprophyticus	+	MIC	63	µg/mL	N	415	treat urinary, respiratory and intestinal problems					X		X						X
Alchornea floribunda Müll. Arg.	Alchornea	floribunda Müll. Arg.	Euphorbiaceae	Cameroon	stem	CEtOAc	Staphylococcus saprophyticus	+	MIC	63	µg/mL	N	415	treat urinary, respiratory and intestinal problems					X		X						X
Alchornea floribunda Müll. Arg.	Alchornea	floribunda Müll. Arg.	Euphorbiaceae	Cameroon	leaf	CEtOAc	Staphylococcus saprophyticus	+	MIC	63	µg/mL	N	415	treat urinary, respiratory and intestinal problems					X		X						X
Alchornea floribunda Müll. Arg.	Alchornea	floribunda Müll. Arg.	Euphorbiaceae	Cameroon	stem	CM	Staphylococcus saprophyticus	+	MIC	63	µg/mL	N	415	treat urinary, respiratory and intestinal problems					X		X						X
Alchornea floribunda Müll. Arg.	Alchornea	floribunda Müll. Arg.	Euphorbiaceae	Cameroon	leaf	CM	Staphylococcus saprophyticus	+	MIC	63	µg/mL	N	415	treat urinary, respiratory and intestinal problems					X		X						X
Alchornea floribunda Müll. Arg.	Alchornea	floribunda Müll. Arg.	Euphorbiaceae	Cameroon	leaf	CChl	Bacillus cereus	+	MIC	70	µg/mL	N	415	treat urinary, respiratory and intestinal problems					X		X						X
Alchornea floribunda Müll. Arg.	Alchornea	floribunda Müll. Arg.	Euphorbiaceae	Cameroon	stem	CE	Bacillus cereus	+	MIC	70	µg/mL	N	415	treat urinary, respiratory and intestinal problems					X		X						X
Alchornea floribunda Müll. Arg.	Alchornea	floribunda Müll. Arg.	Euphorbiaceae	Cameroon	leaf	CEtOAc	Bacillus cereus	+	MIC	70	µg/mL	N	415	treat urinary, respiratory and intestinal problems					X		X						X
Alchornea floribunda Müll. Arg.	Alchornea	floribunda Müll. Arg.	Euphorbiaceae	Cameroon	leaf	CM	Bacillus cereus	+	MIC	70	µg/mL	N	415	treat urinary, respiratory and intestinal problems					X		X						X
Alchornea floribunda Müll. Arg.	Alchornea	floribunda Müll. Arg.	Euphorbiaceae	Cameroon	leaf	CM	Escherichia coli	-	MIC	70	µg/mL	N	415	treat urinary, respiratory and intestinal problems					X		X						X
Alchornea floribunda Müll. Arg.	Alchornea	floribunda Müll. Arg.	Euphorbiaceae	Cameroon	stem	CEtOAc	Staphylococcus aureus	+	MIC	70	µg/mL	N	415	treat urinary, respiratory and intestinal problems					X		X						X
Alchornea floribunda Müll. Arg.	Alchornea	floribunda Müll. Arg.	Euphorbiaceae	Cameroon	root	CChl	Klebsiella pneumoniae	-	MIC	125	µg/mL	N	415	treat urinary, respiratory and intestinal problems					X		X						X
Alchornea floribunda Müll. Arg.	Alchornea	floribunda Müll. Arg.	Euphorbiaceae	Cameroon	root	CE	Klebsiella pneumoniae	-	MIC	125	µg/mL	N	415	treat urinary, respiratory and intestinal problems					X		X						X
Alchornea floribunda Müll. Arg.	Alchornea	floribunda Müll. Arg.	Euphorbiaceae	Cameroon	root	CEtOAc	Klebsiella pneumoniae	-	MIC	125	µg/mL	N	415	treat urinary, respiratory and intestinal problems					X		X						X
Alchornea floribunda Müll. Arg.	Alchornea	floribunda Müll. Arg.	Euphorbiaceae	Cameroon	leaf	CEtOAc	Klebsiella pneumoniae	-	MIC	125	µg/mL	N	415	treat urinary, respiratory and intestinal problems					X		X						X
Alchornea floribunda Müll. Arg.	Alchornea	floribunda Müll. Arg.	Euphorbiaceae	Cameroon	root	CM	Klebsiella pneumoniae	-	MIC	125	µg/mL	N	415	treat urinary, respiratory and intestinal problems					X		X						X
Alchornea floribunda Müll. Arg.	Alchornea	floribunda Müll. Arg.	Euphorbiaceae	Cameroon	leaf	CChl	Klebsiella pneumoniae	-	MIC	125	µg/mL	N	415	treat urinary, respiratory and intestinal problems					X		X						X
Alchornea floribunda Müll. Arg.	Alchornea	floribunda Müll. Arg.	Euphorbiaceae	Cameroon	root	CChl	Moraxella catarrhalis	-	MIC	125	µg/mL	N	415	treat urinary, respiratory and intestinal problems					X		X						X
Alchornea floribunda Müll. Arg.	Alchornea	floribunda Müll. Arg.	Euphorbiaceae	Cameroon	leaf	CChl	Moraxella catarrhalis	-	MIC	125	µg/mL	N	415	treat urinary, respiratory and intestinal problems					X		X						X
Alchornea floribunda Müll. Arg.	Alchornea	floribunda Müll. Arg.	Euphorbiaceae	Cameroon	root	CEtOAc	Moraxella catarrhalis	-	MIC	125	µg/mL	N	415	treat urinary, respiratory and intestinal problems					X		X						X
Alchornea floribunda Müll. Arg.	Alchornea	floribunda Müll. Arg.	Euphorbiaceae	Cameroon	stem	CEtOAc	Moraxella catarrhalis	-	MIC	125	µg/mL	N	415	treat urinary, respiratory and intestinal problems					X		X						X
Alchornea floribunda Müll. Arg.	Alchornea	floribunda Müll. Arg.	Euphorbiaceae	Cameroon	leaf	CEtOAc	Moraxella catarrhalis	-	MIC	125	µg/mL	N	415	treat urinary, respiratory and intestinal problems					X		X						X
Alchornea floribunda Müll. Arg.	Alchornea	floribunda Müll. Arg.	Euphorbiaceae	Cameroon	stem	CE	Proteus mirabilis	-	MIC	125	µg/mL	N	415	treat urinary, respiratory and intestinal problems					X		X						X
Alchornea floribunda Müll. Arg.	Alchornea	floribunda Müll. Arg.	Euphorbiaceae	Cameroon	stem	CEtOAc	Proteus mirabilis	-	MIC	125	µg/mL	N	415	treat urinary, respiratory and intestinal problems					X		X						X
Alchornea floribunda Müll. Arg.	Alchornea	floribunda Müll. Arg.	Euphorbiaceae	Cameroon	stem	CM	Proteus mirabilis	-	MIC	125	µg/mL	N	415	treat urinary, respiratory and intestinal problems					X		X						X
Alchornea floribunda Müll. Arg.	Alchornea	floribunda Müll. Arg.	Euphorbiaceae	Cameroon	root	CChl	Staphylococcus saprophyticus	+	MIC	125	µg/mL	N	415	treat urinary, respiratory and intestinal problems					X		X						X
Alchornea floribunda Müll. Arg.	Alchornea	floribunda Müll. Arg.	Euphorbiaceae	Cameroon	root	CE	Staphylococcus saprophyticus	+	MIC	125	µg/mL	N	415	treat urinary, respiratory and intestinal problems					X		X						X
Alchornea floribunda Müll. Arg.	Alchornea	floribunda Müll. Arg.	Euphorbiaceae	Cameroon	root	CM	Staphylococcus saprophyticus	+	MIC	125	µg/mL	N	415	treat urinary, respiratory and intestinal problems					X		X						X
Alchornea floribunda Müll. Arg.	Alchornea	floribunda Müll. Arg.	Euphorbiaceae	Cameroon	stem	CChl	Staphylococcus saprophyticus	+	MIC	125	µg/mL	N	415	treat urinary, respiratory and intestinal problems					X		X						X
Alchornea floribunda Müll. Arg.	Alchornea	floribunda Müll. Arg.	Euphorbiaceae	Cameroon	leaf	CChl	Staphylococcus saprophyticus	+	MIC	125	µg/mL	N	415	treat urinary, respiratory and intestinal problems					X		X						X
Alchornea floribunda Müll. Arg.	Alchornea	floribunda Müll. Arg.	Euphorbiaceae	Cameroon	root	CEtOAc	Staphylococcus saprophyticus	+	MIC	125	µg/mL	N	415	treat urinary, respiratory and intestinal problems					X		X						X
Alchornea floribunda Müll. Arg.	Alchornea	floribunda Müll. Arg.	Euphorbiaceae	Cameroon	leaf	CChl	Enterococcus faecalis	+	MIC	130	µg/mL	N	415	treat urinary, respiratory and intestinal problems					X		X						X
Alchornea floribunda Müll. Arg.	Alchornea	floribunda Müll. Arg.	Euphorbiaceae	Cameroon	leaf	CE	Escherichia coli	-	MIC	130	µg/mL	N	415	treat urinary, respiratory and intestinal problems					X		X						X
Alchornea floribunda Müll. Arg.	Alchornea	floribunda Müll. Arg.	Euphorbiaceae	Cameroon	stem	CE	Staphylococcus aureus	+	MIC	130	µg/mL	N	415	treat urinary, respiratory and intestinal problems					X		X						X
Alchornea floribunda Müll. Arg.	Alchornea	floribunda Müll. Arg.	Euphorbiaceae	Cameroon	root	CHex	Staphylococcus aureus	+	MIC	130	µg/mL	N	415	treat urinary, respiratory and intestinal problems					X		X						X
Alchornea floribunda Müll. Arg.	Alchornea	floribunda Müll. Arg.	Euphorbiaceae	Cameroon	leaf	CM	Staphylococcus aureus	+	MIC	130	µg/mL	N	415	treat urinary, respiratory and intestinal problems					X		X						X
Alchornea floribunda Müll. Arg.	Alchornea	floribunda Müll. Arg.	Euphorbiaceae	Cameroon	root	CChl	Bacillus cereus	+	MIC	250	µg/mL	N	415	treat urinary, respiratory and intestinal problems					X		X						X
Alchornea floribunda Müll. Arg.	Alchornea	floribunda Müll. Arg.	Euphorbiaceae	Cameroon	stem	CChl	Bacillus cereus	+	MIC	250	µg/mL	N	415	treat urinary, respiratory and intestinal problems					X		X						X
Alchornea floribunda Müll. Arg.	Alchornea	floribunda Müll. Arg.	Euphorbiaceae	Cameroon	root	CE	Bacillus cereus	+	MIC	250	µg/mL	N	415	treat urinary, respiratory and intestinal problems					X		X						X
Alchornea floribunda Müll. Arg.	Alchornea	floribunda Müll. Arg.	Euphorbiaceae	Cameroon	leaf	CE	Bacillus cereus	+	MIC	250	µg/mL	N	415	treat urinary, respiratory and intestinal problems					X		X						X
Alchornea floribunda Müll. Arg.	Alchornea	floribunda Müll. Arg.	Euphorbiaceae	Cameroon	root	CEtOAc	Bacillus cereus	+	MIC	250	µg/mL	N	415	treat urinary, respiratory and intestinal problems					X		X						X
Alchornea floribunda Müll. Arg.	Alchornea	floribunda Müll. Arg.	Euphorbiaceae	Cameroon	root	CChl	Bacillus cereus	+	MIC	250	µg/mL	N	415	treat urinary, respiratory and intestinal problems					X		X						X
Alchornea floribunda Müll. Arg.	Alchornea	floribunda Müll. Arg.	Euphorbiaceae	Cameroon	stem	CChl	Bacillus cereus	+	MIC	250	µg/mL	N	415	treat urinary, respiratory and intestinal problems					X		X						X
Alchornea floribunda Müll. Arg.	Alchornea	floribunda Müll. Arg.	Euphorbiaceae	Cameroon	root	CM	Bacillus cereus	+	MIC	250	µg/mL	N	415	treat urinary, respiratory and intestinal problems					X		X						X
Alchornea floribunda Müll. Arg.	Alchornea	floribunda Müll. Arg.	Euphorbiaceae	Cameroon	stem	CM	Bacillus cereus	+	MIC	250	µg/mL	N	415	treat urinary, respiratory and intestinal problems					X		X						X
Alchornea floribunda Müll. Arg.	Alchornea	floribunda Müll. Arg.	Euphorbiaceae	Cameroon	leaf	CE	Enterococcus faecalis	+	MIC	250	µg/mL	N	415	treat urinary, respiratory and intestinal problems					X		X						X
Alchornea floribunda Müll. Arg.	Alchornea	floribunda Müll. Arg.	Euphorbiaceae	Cameroon	leaf	CEtOAc	Enterococcus faecalis	+	MIC	250	µg/mL	N	415	treat urinary, respiratory and intestinal problems					X		X						X
Alchornea floribunda Müll. Arg.	Alchornea	floribunda Müll. Arg.	Euphorbiaceae	Cameroon	leaf	CM	Enterococcus faecalis	+	MIC	250	µg/mL	N	415	treat urinary, respiratory and intestinal problems					X		X						X
Alchornea floribunda Müll. Arg.	Alchornea	floribunda Müll. Arg.	Euphorbiaceae	Cameroon	root	CChl	Escherichia coli	-	MIC	250	µg/mL	N	415	treat urinary, respiratory and intestinal problems					X		X						X
Alchornea floribunda Müll. Arg.	Alchornea	floribunda Müll. Arg.	Euphorbiaceae	Cameroon	leaf	CChl	Escherichia coli	-	MIC	250	µg/mL	N	415	treat urinary, respiratory and intestinal problems					X		X						X
Alchornea floribunda Müll. Arg.	Alchornea	floribunda Müll. Arg.	Euphorbiaceae	Cameroon	leaf	CEtOAc	Escherichia coli	-	MIC	250	µg/mL	N	415	treat urinary, respiratory and intestinal problems					X		X						X
Alchornea floribunda Müll. Arg.	Alchornea	floribunda Müll. Arg.	Euphorbiaceae	Cameroon	stem	CChl	Klebsiella pneumoniae	-	MIC	250	µg/mL	N	415	treat urinary, respiratory and intestinal problems					X		X						X
Alchornea floribunda Müll. Arg.	Alchornea	floribunda Müll. Arg.	Euphorbiaceae	Cameroon	root	CE	Moraxella catarrhalis	-	MIC	250	µg/mL	N	415	treat urinary, respiratory and intestinal problems					X		X						X
Alchornea floribunda Müll. Arg.	Alchornea	floribunda Müll. Arg.	Euphorbiaceae	Cameroon	root	CM	Moraxella catarrhalis	-	MIC	250	µg/mL	N	415	treat urinary, respiratory and intestinal problems					X		X						X
Alchornea floribunda Müll. Arg.	Alchornea	floribunda Müll. Arg.	Euphorbiaceae	Cameroon	root	CChl	Proteus mirabilis	-	MIC	250	µg/mL	N	415	treat urinary, respiratory and intestinal problems					X		X						X
Alchornea floribunda Müll. Arg.	Alchornea	floribunda Müll. Arg.	Euphorbiaceae	Cameroon	stem	CChl	Staphylococcus aureus	+	MIC	250	µg/mL	N	415	treat urinary, respiratory and intestinal problems					X		X						X
Alchornea floribunda Müll. Arg.	Alchornea	floribunda Müll. Arg.	Euphorbiaceae	Cameroon	root	CHex	Staphylococcus saprophyticus	+	MIC	250	µg/mL	N	415	treat urinary, respiratory and intestinal problems					X		X						X
Alchornea floribunda Müll. Arg.	Alchornea	floribunda Müll. Arg.	Euphorbiaceae	Cameroon	leaf	CHex	Staphylococcus saprophyticus	+	MIC	250	µg/mL	N	415	treat urinary, respiratory and intestinal problems					X		X						X
Alchornea floribunda Müll. Arg.	Alchornea	floribunda Müll. Arg.	Euphorbiaceae	Cameroon	stem	CHex	Staphylococcus saprophyticus	+	MIC	250	µg/mL	N	415	treat urinary, respiratory and intestinal problems					X		X						X
Alchornea floribunda Müll. Arg.	Alchornea	floribunda Müll. Arg.	Euphorbiaceae	Cameroon	stem	CEtOAc	Bacillus cereus	+	MIC	500	µg/mL	N	415	treat urinary, respiratory and intestinal problems					X		X						X
Alchornea floribunda Müll. Arg.	Alchornea	floribunda Müll. Arg.	Euphorbiaceae	Cameroon	root	CHex	Bacillus cereus	+	MIC	500	µg/mL	N	415	treat urinary, respiratory and intestinal problems					X		X						X
Alchornea floribunda Müll. Arg.	Alchornea	floribunda Müll. Arg.	Euphorbiaceae	Cameroon	stem	CHex	Bacillus cereus	+	MIC	500	µg/mL	N	415	treat urinary, respiratory and intestinal problems					X		X						X
Alchornea floribunda Müll. Arg.	Alchornea	floribunda Müll. Arg.	Euphorbiaceae	Cameroon	leaf	CHex	Bacillus cereus	+	MIC	500	µg/mL	N	415	treat urinary, respiratory and intestinal problems					X		X						X
Alchornea floribunda Müll. Arg.	Alchornea	floribunda Müll. Arg.	Euphorbiaceae	Cameroon	stem	CChl	Escherichia coli	-	MIC	500	µg/mL	N	415	treat urinary, respiratory and intestinal problems					X		X						X
Alchornea floribunda Müll. Arg.	Alchornea	floribunda Müll. Arg.	Euphorbiaceae	Cameroon	root	CE	Escherichia coli	-	MIC	500	µg/mL	N	415	treat urinary, respiratory and intestinal problems					X		X						X
Alchornea floribunda Müll. Arg.	Alchornea	floribunda Müll. Arg.	Euphorbiaceae	Cameroon	root	CEtOAc	Escherichia coli	-	MIC	500	µg/mL	N	415	treat urinary, respiratory and intestinal problems					X		X						X
Alchornea floribunda Müll. Arg.	Alchornea	floribunda Müll. Arg.	Euphorbiaceae	Cameroon	stem	CEtOAc	Escherichia coli	-	MIC	500	µg/mL	N	415	treat urinary, respiratory and intestinal problems					X		X						X
Alchornea floribunda Müll. Arg.	Alchornea	floribunda Müll. Arg.	Euphorbiaceae	Cameroon	leaf	CHex	Escherichia coli	-	MIC	500	µg/mL	N	415	treat urinary, respiratory and intestinal problems					X		X						X
Alchornea floribunda Müll. Arg.	Alchornea	floribunda Müll. Arg.	Euphorbiaceae	Cameroon	root	CEtOAc	Escherichia coli	-	MIC	500	µg/mL	N	415	treat urinary, respiratory and intestinal problems					X		X						X
Alchornea floribunda Müll. Arg.	Alchornea	floribunda Müll. Arg.	Euphorbiaceae	Cameroon	stem	CEtOAc	Escherichia coli	-	MIC	500	µg/mL	N	415	treat urinary, respiratory and intestinal problems					X		X						X
Alchornea floribunda Müll. Arg.	Alchornea	floribunda Müll. Arg.	Euphorbiaceae	Cameroon	leaf	CHex	Klebsiella pneumoniae	-	MIC	500	µg/mL	N	415	treat urinary, respiratory and intestinal problems					X		X						X
Alchornea floribunda Müll. Arg.	Alchornea	floribunda Müll. Arg.	Euphorbiaceae	Cameroon	leaf	CE	Moraxella catarrhalis	-	MIC	500	µg/mL	N	415	treat urinary, respiratory and intestinal problems					X		X						X
Alchornea floribunda Müll. Arg.	Alchornea	floribunda Müll. Arg.	Euphorbiaceae	Cameroon	leaf	CHex	Moraxella catarrhalis	-	MIC	500	µg/mL	N	415	treat urinary, respiratory and intestinal problems					X		X						X
Alchornea floribunda Müll. Arg.	Alchornea	floribunda Müll. Arg.	Euphorbiaceae	Cameroon	leaf	CM	Moraxella catarrhalis	-	MIC	500	µg/mL	N	415	treat urinary, respiratory and intestinal problems					X		X						X
Alchornea floribunda Müll. Arg.	Alchornea	floribunda Müll. Arg.	Euphorbiaceae	Cameroon	root	CE	Proteus mirabilis	-	MIC	500	µg/mL	N	415	treat urinary, respiratory and intestinal problems					X		X						X
Alchornea floribunda Müll. Arg.	Alchornea	floribunda Müll. Arg.	Euphorbiaceae	Cameroon	root	CEtOAc	Proteus mirabilis	-	MIC	500	µg/mL	N	415	treat urinary, respiratory and intestinal problems					X		X						X
Alchornea floribunda Müll. Arg.	Alchornea	floribunda Müll. Arg.	Euphorbiaceae	Cameroon	root	CM	Proteus mirabilis	-	MIC	500	µg/mL	N	415	treat urinary, respiratory and intestinal problems					X		X						X
Alchornea floribunda Müll. Arg.	Alchornea	floribunda Müll. Arg.	Euphorbiaceae	Cameroon	leaf	CChl	Staphylococcus aureus	+	MIC	500	µg/mL	N	415	treat urinary, respiratory and intestinal problems					X		X						X
Alchornea floribunda Müll. Arg.	Alchornea	floribunda Müll. Arg.	Euphorbiaceae	Cameroon	root	CE	Staphylococcus aureus	+	MIC	500	µg/mL	N	415	treat urinary, respiratory and intestinal problems					X		X						X
Alchornea floribunda Müll. Arg.	Alchornea	floribunda Müll. Arg.	Euphorbiaceae	Cameroon	stem	CHex	Staphylococcus aureus	+	MIC	500	µg/mL	N	415	treat urinary, respiratory and intestinal problems					X		X						X
Alchornea floribunda Müll. Arg.	Alchornea	floribunda Müll. Arg.	Euphorbiaceae	Cameroon	root	CM	Staphylococcus aureus	+	MIC	500	µg/mL	N	415	treat urinary, respiratory and intestinal problems					X		X						X
Alchornea floribunda Müll. Arg.	Alchornea	floribunda Müll. Arg.	Euphorbiaceae	Cameroon	leaf	CM	Staphylococcus aureus	+	MIC	128	µg/mL	N	461	antibacterial, anti-inflammatory, antioxidant, antiprotozoal, cytotoxicity						X
Alchornea floribunda Müll. Arg.	Alchornea	floribunda Müll. Arg.	Euphorbiaceae	Cameroon	stem bark	CM	Enterobacter aerogenes	-	MIC	256	µg/mL	N	461	antibacterial, anti-inflammatory, antioxidant, antiprotozoal, cytotoxicity						X
Alchornea floribunda Müll. Arg.	Alchornea	floribunda Müll. Arg.	Euphorbiaceae	Cameroon	leaf	CM	Enterobacter cloacae	-	MIC	256	µg/mL	N	461	antibacterial, anti-inflammatory, antioxidant, antiprotozoal, cytotoxicity						X
Alchornea floribunda Müll. Arg.	Alchornea	floribunda Müll. Arg.	Euphorbiaceae	Cameroon	stem bark	CM	Escherichia coli	-	MIC	256	µg/mL	N	461	antibacterial, anti-inflammatory, antioxidant, antiprotozoal, cytotoxicity						X
Alchornea floribunda Müll. Arg.	Alchornea	floribunda Müll. Arg.	Euphorbiaceae	Cameroon	leaf	CM	Klebsiella pneumoniae	-	MIC	256	µg/mL	N	461	antibacterial, anti-inflammatory, antioxidant, antiprotozoal, cytotoxicity						X
Alchornea floribunda Müll. Arg.	Alchornea	floribunda Müll. Arg.	Euphorbiaceae	Cameroon	stem bark	CM	Providencia stuartii	-	MIC	256	µg/mL	N	461	antibacterial, anti-inflammatory, antioxidant, antiprotozoal, cytotoxicity						X
Alchornea floribunda Müll. Arg.	Alchornea	floribunda Müll. Arg.	Euphorbiaceae	Cameroon	stem bark	CM	Staphylococcus aureus	+	MIC	256	µg/mL	N	461	antibacterial, anti-inflammatory, antioxidant, antiprotozoal, cytotoxicity						X
Alchornea laxiflora (Benth.) Pax & K Hoffm.	Alchornea	laxiflora (Benth.) Pax & K Hoffm.	Euphorbiaceae	Cameroon	bark	CM	Enterobacter aerogenes	-	MIC	64	µg/mL	N	432	treatment inflammatory and infectious diseases, poliomyelitis and measles						X				X
Alchornea laxiflora (Benth.) Pax & K Hoffm.	Alchornea	laxiflora (Benth.) Pax & K Hoffm.	Euphorbiaceae	Cameroon	leaf	CM	Enterobacter aerogenes	-	MIC	128	µg/mL	N	432	treatment inflammatory and infectious diseases, poliomyelitis and measles						X				X
Alchornea laxiflora (Benth.) Pax & K Hoffm.	Alchornea	laxiflora (Benth.) Pax & K Hoffm.	Euphorbiaceae	Cameroon	leaf	CM	Escherichia coli	-	MIC	128	µg/mL	N	432	treatment inflammatory and infectious diseases, poliomyelitis and measles						X				X
Alchornea laxiflora (Benth.) Pax & K Hoffm.	Alchornea	laxiflora (Benth.) Pax & K Hoffm.	Euphorbiaceae	Cameroon	leaf	CM	Providencia stuartii	-	MIC	128	µg/mL	N	432	treatment inflammatory and infectious diseases, poliomyelitis and measles						X				X
Alchornea laxiflora (Benth.) Pax & K Hoffm.	Alchornea	laxiflora (Benth.) Pax & K Hoffm.	Euphorbiaceae	Cameroon	leaf	CM	Klebsiella pneumoniae	-	MIC	256	µg/mL	N	432	Treatment inflammatory and infectious diseases, poliomyelitis and measles						X				X
Alchornea laxiflora (Benth.) Pax & K Hoffm.	Alchornea	laxiflora (Benth.) Pax & K Hoffm.	Euphorbiaceae	Cameroon	bark	CM	Klebsiella pneumoniae	-	MIC	256	µg/mL	N	432	Treatment inflammatory and infectious diseases, poliomyelitis and measles						X				X
Alectryon oleifolius (Desf.) Reynolds	Alectryon	oleifolius (Desf.) Reynolds	Sapindaceae	Australia	leaf	CE	Campylobacter jejuni	-	MIC	256	µg/mL	N	243	NS	X
Aleurites moluccanus (L.) Willd.	Aleurites	moluccanus (L.) Willd.	Euphorbiaceae	Indonesia	bark	CE	Staphylococcus aureus	+	MIC	256	µg/mL	N	378	NS	X
Allanblackia gabonensis (Pellegr.) Bamps	Allanblackia	gabonensis (Pellegr.) Bamps	Clusiaceae	Cameroon	fruit	CM	Enterobacter aerogenes	-	MIC	16	µg/mL	N	159	dysentary, cold, toothache, pain, rheumatism, inflammations					X	X			X			X
Allanblackia gabonensis (Pellegr.) Bamps	Allanblackia	gabonensis (Pellegr.) Bamps	Clusiaceae	Cameroon	fruit	CM	Escherichia coli	-	MIC	16	µg/mL	N	159	dysentary, cold, toothache, pain, rheumatism, inflammations					X	X			X			X
Allanblackia gabonensis (Pellegr.) Bamps	Allanblackia	gabonensis (Pellegr.) Bamps	Clusiaceae	Cameroon	fruit	CM	Klebsiella pneumoniae	-	MIC	16	µg/mL	N	159	dysentary, cold, toothache, pain, rheumatism, inflammations					X	X			X			X
Allanblackia gabonensis (Pellegr.) Bamps	Allanblackia	gabonensis (Pellegr.) Bamps	Clusiaceae	Cameroon	fruit	CM	Providencia stuartii	-	MIC	16	µg/mL	N	159	dysentary, cold, toothache, pain, rheumatism, inflammations					X	X			X			X
Allanblackia gabonensis (Pellegr.) Bamps	Allanblackia	gabonensis (Pellegr.) Bamps	Clusiaceae	Cameroon	stem bark	CM	Enterobacter aerogenes	-	MIC	32	µg/mL	N	159	dysentary, cold, toothache, pain, rheumatism, inflammations					X	X			X			X
Allanblackia gabonensis (Pellegr.) Bamps	Allanblackia	gabonensis (Pellegr.) Bamps	Clusiaceae	Cameroon	root bark	CM	Enterobacter aerogenes	-	MIC	32	µg/mL	N	159	dysentary, cold, toothache, pain, rheumatism, inflammations					X	X			X			X
Allanblackia gabonensis (Pellegr.) Bamps	Allanblackia	gabonensis (Pellegr.) Bamps	Clusiaceae	Cameroon	stem bark	CM	Escherichia coli	-	MIC	32	µg/mL	N	159	dysentary, cold, toothache, pain, rheumatism, inflammations					X	X			X			X
Allanblackia gabonensis (Pellegr.) Bamps	Allanblackia	gabonensis (Pellegr.) Bamps	Clusiaceae	Cameroon	stem bark	CM	Klebsiella pneumoniae	-	MIC	32	µg/mL	N	159	dysentary, cold, toothache, pain, rheumatism, inflammations					X	X			X			X
Allanblackia gabonensis (Pellegr.) Bamps	Allanblackia	gabonensis (Pellegr.) Bamps	Clusiaceae	Cameroon	root bark	CM	Klebsiella pneumoniae	-	MIC	32	µg/mL	N	159	dysentary, cold, toothache, pain, rheumatism, inflammations					X	X			X			X
Allanblackia gabonensis (Pellegr.) Bamps	Allanblackia	gabonensis (Pellegr.) Bamps	Clusiaceae	Cameroon	flower	CM	Providencia stuartii	-	MIC	32	µg/mL	N	159	dysentary, cold, toothache, pain, rheumatism, inflammations					X	X			X			X
Allanblackia gabonensis (Pellegr.) Bamps	Allanblackia	gabonensis (Pellegr.) Bamps	Clusiaceae	Cameroon	flower	CM	Escherichia coli	-	MIC	64	µg/mL	N	159	dysentary, cold, toothache, pain, rheumatism, inflammations					X	X			X			X
Allanblackia gabonensis (Pellegr.) Bamps	Allanblackia	gabonensis (Pellegr.) Bamps	Clusiaceae	Cameroon	root bark	CM	Escherichia coli	-	MIC	64	µg/mL	N	159	dysentary, cold, toothache, pain, rheumatism, inflammations					X	X			X			X
Allanblackia gabonensis (Pellegr.) Bamps	Allanblackia	gabonensis (Pellegr.) Bamps	Clusiaceae	Cameroon	flower	CM	Klebsiella pneumoniae	-	MIC	64	µg/mL	N	159	dysentary, cold, toothache, pain, rheumatism, inflammations					X	X			X			X
Allanblackia gabonensis (Pellegr.) Bamps	Allanblackia	gabonensis (Pellegr.) Bamps	Clusiaceae	Cameroon	root bark	CM	Providencia stuartii	-	MIC	64	µg/mL	N	159	dysentary, cold, toothache, pain, rheumatism, inflammations					X	X			X			X
Allanblackia gabonensis (Pellegr.) Bamps	Allanblackia	gabonensis (Pellegr.) Bamps	Clusiaceae	Cameroon	flower	CM	Enterobacter aerogenes	-	MIC	128	µg/mL	N	159	dysentary, cold, toothache, pain, rheumatism, inflammations					X	X			X			X
Allanblackia gabonensis (Pellegr.) Bamps	Allanblackia	gabonensis (Pellegr.) Bamps	Clusiaceae	Cameroon	leaf	CM	Providencia stuartii	-	MIC	128	µg/mL	N	159	dysentary, cold, toothache, pain, rheumatism, inflammations					X	X			X			X
Allanblackia gabonensis (Pellegr.) Bamps	Allanblackia	gabonensis (Pellegr.) Bamps	Clusiaceae	Cameroon	stem bark	CM	Providencia stuartii	-	MIC	128	µg/mL	N	159	dysentary, cold, toothache, pain, rheumatism, inflammations					X	X			X			X
Allanblackia gabonensis (Pellegr.) Bamps	Allanblackia	gabonensis (Pellegr.) Bamps	Clusiaceae	Cameroon	leaf	CM	Enterobacter aerogenes	-	MIC	256	µg/mL	N	159	dysentary, cold, toothache, pain, rheumatism, inflammations					X	X			X			X
Allanblackia gabonensis (Pellegr.) Bamps	Allanblackia	gabonensis (Pellegr.) Bamps	Clusiaceae	Cameroon	leaf	CM	Klebsiella pneumoniae	-	MIC	256	µg/mL	N	159	dysentary, cold, toothache, pain, rheumatism, inflammations					X	X			X			X
Allardia tomentosa Decne.	Allardia	tomentosa Decne.	Asteraceae	India	whole plant	Fr.	Staphylococcus aureus	+	MIC	62.5	µg/mL	N	68	common infections, acidity, arthritis, rheumatism					X	X			X
Allardia tomentosa Decne.	Allardia	tomentosa Decne.	Asteraceae	India	whole plant	Fr.	Escherichia coli	-	MIC	125	µg/mL	N	68	common infections, acidity, arthritis, rheumatism					X	X			X
Allardia tomentosa Decne.	Allardia	tomentosa Decne.	Asteraceae	India	whole plant	Fr.	Acinetobacter sp.	-	MIC	250	µg/mL	N	68	common infections, acidity, arthritis, rheumatism					X	X			X
Allardia tomentosa Decne.	Allardia	tomentosa Decne.	Asteraceae	India	whole plant	Fr.	Serratia sp.	-	MIC	250	µg/mL	N	68	common infections, acidity, arthritis, rheumatism					X	X			X
Allium cepa L.	Allium	cepa L.	Amaryllidaceae	Iran	whole plant	EO	Escherichia coli	-	MIC	93.8	μL/mL	Y	184	NS	X
Allium flavum L.	Allium	flavum L.	Amaryllidaceae	Serbia	aerial part	CEtOAc	Pseudomonas aeruginosa	-	MIC	153	µg/mL	N	107	hepatoprotective, antihypertensive, immunostimulant		X			X	X
Allium flavum L.	Allium	flavum L.	Amaryllidaceae	Serbia	aerial part	CEtOAc	Bacillus subtilis	+	MIC	312.5	µg/mL	N	107	hepatoprotective, antihypertensive, immunostimulant		X			X	X
Allium flavum L.	Allium	flavum L.	Amaryllidaceae	Serbia	aerial part	CAcet	Pseudomonas aeruginosa	-	MIC	312.5	µg/mL	N	107	hepatoprotective, antihypertensive, immunostimulant		X			X	X
Allium flavum L.	Allium	flavum L.	Amaryllidaceae	Serbia	aerial part	CM	Staphylococcus aureus	+	MIC	312.5	µg/mL	N	107	hepatoprotective, antihypertensive, immunostimulant		X			X	X
Allium flavum L.	Allium	flavum L.	Amaryllidaceae	Serbia	aerial part	CEtOAc	Staphylococcus aureus	+	MIC	312.5	µg/mL	N	107	hepatoprotective, antihypertensive, immunostimulant		X			X	X
Allium sativum L.	Allium	sativum L.	Amaryllidaceae	Iran	whole plant	EO	Escherichia coli	-	MIC	500	μL/mL	Y	184	NS	X
Allium sativum L.	Allium	sativum L.	Amaryllidaceae	India	bulb	Pa.	Bacillus subtilis	+	MIC	100	µg/mL	N	297	antiseptic						X
Allium sativum L.	Allium	sativum L.	Amaryllidaceae	India	bulb	Pa.	Escherichia coli	-	MIC	100	µg/mL	N	297	antiseptic						X
Allium sativum L.	Allium	sativum L.	Amaryllidaceae	India	bulb	Pa.	Klebsiella pneumoniae	-	MIC	100	µg/mL	N	297	antiseptic						X
Allium sativum L.	Allium	sativum L.	Amaryllidaceae	India	bulb	Pa.	Staphylococcus aureus	+	MIC	100	µg/mL	N	297	antiseptic						X
Allium sativum L.	Allium	sativum L.	Amaryllidaceae	India	bulb	Pa.	Escherichia coli	-	MIC	150	µg/mL	N	297	antiseptic						X
Allium sativum L.	Allium	sativum L.	Amaryllidaceae	India	bulb	Pa.	Klebsiella pneumoniae	-	MIC	150	µg/mL	N	297	antiseptic						X
Allium sativum L.	Allium	sativum L.	Amaryllidaceae	Korea	rhizome	EO	Bacillus cereus	+	MIC	62.5	µg/mL	N	406	NS	X
Allium sativum L.	Allium	sativum L.	Amaryllidaceae	Korea	rhizome	EO	Listeria monocytogenes	+	MIC	125	µg/mL	N	406	NS	X
Allium sativum L.	Allium	sativum L.	Amaryllidaceae	Korea	rhizome	EO	Staphylococcus aureus	+	MIC	125	µg/mL	N	406	NS	X
Allium sativum L.	Allium	sativum L.	Amaryllidaceae	Korea	rhizome	EO	Escherichia coli	-	MIC	250	µg/mL	N	406	NS	X
Allium sativum L.	Allium	sativum L.	Amaryllidaceae	Korea	rhizome	EO	Salmonella typhimurium	-	MIC	250	µg/mL	N	406	NS	X
Allium stipitatum Regel	Allium	stipitatum Regel	Amaryllidaceae	Iran	bulb	CE	Escherichia coli	-	MIC	42	µg/mL	N	24	treatment against infectious disease						X
Allium stipitatum Regel	Allium	stipitatum Regel	Amaryllidaceae	Iran	bulb	Fr.	Staphylococcus aureus	+	MIC	4	µg/mL	N	222	NS	X
Allium stipitatum Regel	Allium	stipitatum Regel	Amaryllidaceae	Iran	bulb	Fr.	Staphylococcus aureus	+	MIC	16	µg/mL	N	222	NS	X
Allium stipitatum Regel	Allium	stipitatum Regel	Amaryllidaceae	Iran	bulb	Fr.	Staphylococcus aureus	+	MIC	16	µg/mL	N	222	NS	X
Allium stipitatum Regel	Allium	stipitatum Regel	Amaryllidaceae	Iran	bulb	Fr.	Staphylococcus aureus	+	MIC	32	µg/mL	N	222	NS	X
Allophylus cobbe (L.) Raeusch.	Allophylus	cobbe (L.) Raeusch.	Sapindaceae	Bangladesh	NS	CPEt	Salmonella paratyphi	-	MIC	31.25	µg/mL	N	210	anti-diarrheal					X
Allophylus cobbe (L.) Raeusch.	Allophylus	cobbe (L.) Raeusch.	Sapindaceae	Bangladesh	NS	CM	Shigella dysenteriae	-	MIC	31.25	µg/mL	N	210	anti-diarrheal					X
Allophylus cobbe (L.) Raeusch.	Allophylus	cobbe (L.) Raeusch.	Sapindaceae	Bangladesh	NS	CPEt	Shigella sonnei	-	MIC	31.25	µg/mL	N	210	anti-diarrheal					X
Allophylus cobbe (L.) Raeusch.	Allophylus	cobbe (L.) Raeusch.	Sapindaceae	Bangladesh	NS	CPEt	Bacillus megaterium	+	MIC	62.5	µg/mL	N	210	anti-diarrheal					X
Allophylus cobbe (L.) Raeusch.	Allophylus	cobbe (L.) Raeusch.	Sapindaceae	Bangladesh	NS	CM	Bacillus megaterium	+	MIC	62.5	µg/mL	N	210	anti-diarrheal					X
Allophylus cobbe (L.) Raeusch.	Allophylus	cobbe (L.) Raeusch.	Sapindaceae	Bangladesh	NS	CPEt	Bacillus subtilis	+	MIC	62.5	µg/mL	N	210	anti-diarrheal					X
Allophylus cobbe (L.) Raeusch.	Allophylus	cobbe (L.) Raeusch.	Sapindaceae	Bangladesh	NS	CE	Bacillus subtilis	+	MIC	62.5	µg/mL	N	210	anti-diarrheal					X
Allophylus cobbe (L.) Raeusch.	Allophylus	cobbe (L.) Raeusch.	Sapindaceae	Bangladesh	NS	CPEt	Bacillus cereus	+	MIC	125	µg/mL	N	210	anti-diarrheal					X
Allophylus cobbe (L.) Raeusch.	Allophylus	cobbe (L.) Raeusch.	Sapindaceae	Bangladesh	NS	CM	Escherichia coli	-	MIC	125	µg/mL	N	210	anti-diarrheal					X
Allophylus cobbe (L.) Raeusch.	Allophylus	cobbe (L.) Raeusch.	Sapindaceae	Bangladesh	NS	CE	Salmonella paratyphi	-	MIC	125	µg/mL	N	210	anti-diarrheal					X
Allophylus cobbe (L.) Raeusch.	Allophylus	cobbe (L.) Raeusch.	Sapindaceae	Bangladesh	NS	CE	Staphylococcus aureus	+	MIC	125	µg/mL	N	210	anti-diarrheal					X
Allophylus cobbe (L.) Raeusch.	Allophylus	cobbe (L.) Raeusch.	Sapindaceae	Bangladesh	NS	CPEt	Vibrio cholerae	-	MIC	125	µg/mL	N	210	anti-diarrheal					X
Allophylus cobbe (L.) Raeusch.	Allophylus	cobbe (L.) Raeusch.	Sapindaceae	Bangladesh	NS	CE	Vibrio cholerae	-	MIC	125	µg/mL	N	210	anti-diarrheal					X
Alnus nepalensis D.Don	Alnus	nepalensis D.Don	Betulaceae	China	branch, leaf	CE	Staphylococcus aureus (MRSA)	+	MIC	256	µg/mL	N	480	nose bleeds, enteritis, dysentery					X	X
Aloe arborescens Mill.	Aloe	arborescens Mill.	Asphodelaceae	South Africa	leaf	CAcet	Shigella flexneri	-	MIC	18	µg/mL	N	70	antitumor, enema, stomach pain					X
Aloe arborescens Mill.	Aloe	arborescens Mill.	Asphodelaceae	South Africa	leaf	CAcet	Staphylococcus aureus	+	MIC	18	µg/mL	N	70	antitumor, enema, stomach pain					X
Aloe arborescens Mill.	Aloe	arborescens Mill.	Asphodelaceae	South Africa	leaf	CAcet	Shigella sonnei	-	MIC	39	µg/mL	N	70	antitumor, enema, stomach pain					X
Aloe arborescens Mill.	Aloe	arborescens Mill.	Asphodelaceae	South Africa	leaf	CAcet	Enterococcus faecalis	+	MIC	89	µg/mL	N	70	antitumor, enema, stomach pain					X
Aloe arborescens Mill.	Aloe	arborescens Mill.	Asphodelaceae	South Africa	leaf	CAcet	Salmonella typhimurium	-	MIC	156	µg/mL	N	70	antitumor, enema, stomach pain					X
Aloe arborescens Mill.	Aloe	arborescens Mill.	Asphodelaceae	South Africa	leaf	CAcet	Salmonella enterica serovar Isangi	-	MIC	156	µg/mL	N	70	antitumor, enema, stomach pain					X
Aloe arborescens Mill.	Aloe	arborescens Mill.	Asphodelaceae	South Africa	leaf	CDichl	Cutibacterium acnes	+	MIC	500	µg/mL	N	273	wound or burn treatment			X
Aloe buettneri A. Berger	Aloe	buettneri A. Berger	Asphodelaceae	Cameroon	leaf	CM	Enterobacter aerogenes	-	MIC	256	µg/mL	N	461	anti-ulcer, anti-inflammatory, ovarian steroidogenesis, sub-acute toxicity, analgesic, antipyretic			X			X		X		X
Aloe macrocarpa Tod	Aloe	macrocarpa Tod	Asphodelaceae	Ethiopia	latex	None	Pseudomonas aeruginosa	-	MIC	31.25	µg/mL	N	131	haemorrhoids, dandruff, malaria, eye disease, infected wound, cessation of breast feeding and for replacement of hair loss from cattle			X		X	X		X			X
Aloe macrocarpa Tod	Aloe	macrocarpa Tod	Asphodelaceae	Ethiopia	gel	CM	Pseudomonas aeruginosa	-	MIC	31.25	µg/mL	N	131	haemorrhoids, dandruff, malaria, eye disease, infected wound, cessation of breast feeding and for replacement of hair loss from cattle			X		X	X		X			X
Aloe macrocarpa Tod	Aloe	macrocarpa Tod	Asphodelaceae	Ethiopia	latex	None	Streptococcus pneumoniae	+	MIC	31.25	µg/mL	N	131	haemorrhoids, dandruff, malaria, eye disease, infected wound, cessation of breast feeding and for replacement of hair loss from cattle			X		X	X		X			X
Aloe macrocarpa Tod	Aloe	macrocarpa Tod	Asphodelaceae	Ethiopia	latex	None	Streptococcus pyogenes	+	MIC	31.25	µg/mL	N	131	haemorrhoids, dandruff, malaria, eye disease, infected wound, cessation of breast feeding and for replacement of hair loss from cattle			X		X	X		X			X
Aloe macrocarpa Tod	Aloe	macrocarpa Tod	Asphodelaceae	Ethiopia	gel	CM	Escherichia coli	-	MIC	62.5	µg/mL	N	131	haemorrhoids, dandruff, malaria, eye disease, infected wound, cessation of breast feeding and for replacement of hair loss from cattle			X		X	X		X			X
Aloe macrocarpa Tod	Aloe	macrocarpa Tod	Asphodelaceae	Ethiopia	gel	None	Pseudomonas aeruginosa	-	MIC	62.5	µg/mL	N	131	haemorrhoids, dandruff, malaria, eye disease, infected wound, cessation of breast feeding and for replacement of hair loss from cattle			X		X	X		X			X
Aloe macrocarpa Tod	Aloe	macrocarpa Tod	Asphodelaceae	Ethiopia	gel	CM	Streptococcus pneumoniae	+	MIC	62.5	µg/mL	N	131	haemorrhoids, dandruff, malaria, eye disease, infected wound, cessation of breast feeding and for replacement of hair loss from cattle			X		X	X		X			X
Aloe macrocarpa Tod	Aloe	macrocarpa Tod	Asphodelaceae	Ethiopia	latex	None	Klebsiella pneumoniae	-	MIC	125	µg/mL	N	131	haemorrhoids, dandruff, malaria, eye disease, infected wound, cessation of breast feeding and for replacement of hair loss from cattle			X		X	X		X			X
Aloe macrocarpa Tod	Aloe	macrocarpa Tod	Asphodelaceae	Ethiopia	gel	None	Streptococcus pneumoniae	+	MIC	125	µg/mL	N	131	haemorrhoids, dandruff, malaria, eye disease, infected wound, cessation of breast feeding and for replacement of hair loss from cattle			X		X	X		X			X
Aloe macrocarpa Tod	Aloe	macrocarpa Tod	Asphodelaceae	Ethiopia	latex	None	Escherichia coli	-	MIC	500	µg/mL	N	131	haemorrhoids, dandruff, malaria, eye disease, infected wound, cessation of breast feeding and for replacement of hair loss from cattle			X		X	X		X			X
Aloe macrocarpa Tod	Aloe	macrocarpa Tod	Asphodelaceae	Ethiopia	gel	None	Escherichia coli	-	MIC	500	µg/mL	N	131	haemorrhoids, dandruff, malaria, eye disease, infected wound, cessation of breast feeding and for replacement of hair loss from cattle			X		X	X		X			X
Aloe macrocarpa Tod	Aloe	macrocarpa Tod	Asphodelaceae	Ethiopia	latex	None	Salmonella typhi	-	MIC	500	µg/mL	N	131	haemorrhoids, dandruff, malaria, eye disease, infected wound, cessation of breast feeding and for replacement of hair loss from cattle			X		X	X		X			X
Aloe marlothii A.Berger	Aloe	marlothii A.Berger	Asphodelaceae	South Africa	leaf	CA	Oligella ureolytica	-	MIC	380	µg/mL	N	323	STI treatment								X
Aloe parvibracteata Schonland	Aloe	parvibracteata Schonland	Asphodelaceae	Portugal	leaf	CM	Micrococcus luteus	+	MIC	15	µg/mL	N	278	injury						X
Aloe parvibracteata Schonland	Aloe	parvibracteata Schonland	Asphodelaceae	Portugal	leaf	CDichl	Staphylococcus aureus	+	MIC	31	µg/mL	N	278	injury						X
Aloe parvibracteata Schonland	Aloe	parvibracteata Schonland	Asphodelaceae	Portugal	leaf	CEtOAc	Enterococcus faecalis	+	MIC	62.5	µg/mL	N	278	injury						X
Aloe parvibracteata Schonland	Aloe	parvibracteata Schonland	Asphodelaceae	Portugal	leaf	CEtOAc	Staphylococcus aureus	+	MIC	62.5	µg/mL	N	278	injury						X
Aloe parvibracteata Schonland	Aloe	parvibracteata Schonland	Asphodelaceae	Portugal	leaf	CDichl	Enterococcus faecalis	+	MIC	125	µg/mL	N	278	injury						X
Aloe parvibracteata Schonland	Aloe	parvibracteata Schonland	Asphodelaceae	Portugal	leaf	CEtOAc	Pseudomonas aeruginosa	-	MIC	125	µg/mL	N	278	injury						X
Aloe parvibracteata Schonland	Aloe	parvibracteata Schonland	Asphodelaceae	Portugal	leaf	CM	Enterococcus faecalis	+	MIC	250	µg/mL	N	278	injury						X
Aloe striata Haw.	Aloe	striata Haw.	Asphodelaceae	South Africa	leaf	CAcet	Staphylococcus aureus	+	MIC	18	µg/mL	N	70	antitumor, enema, stomach pain					X
Aloe striata Haw.	Aloe	striata Haw.	Asphodelaceae	South Africa	leaf	CAcet	Enterococcus faecalis	+	MIC	39	µg/mL	N	70	antitumor, enema, stomach pain					X
Aloe striata Haw.	Aloe	striata Haw.	Asphodelaceae	South Africa	leaf	CAcet	Shigella sonnei	-	MIC	39	µg/mL	N	70	antitumor, enema, stomach pain					X
Aloe striata Haw.	Aloe	striata Haw.	Asphodelaceae	South Africa	leaf	CAcet	Shigella flexneri	-	MIC	78	µg/mL	N	70	antitumor, enema, stomach pain					X
Aloe striata Haw.	Aloe	striata Haw.	Asphodelaceae	South Africa	leaf	CAcet	Salmonella enterica serovar Isangi	-	MIC	312	µg/mL	N	70	antitumor, enema, stomach pain					X
Aloe striata Haw.	Aloe	striata Haw.	Asphodelaceae	South Africa	leaf	CAcet	Salmonella typhi	-	MIC	312	µg/mL	N	70	antitumor, enema, stomach pain					X
Aloe trichosantha A.Berger	Aloe	trichosantha A.Berger	Asphodelaceae	Ethiopia	leaf (latex)	CM	Shigella boydii	-	MIC	10	µg/mL	N	353	stomach ailments, gastro-intestinal problems, and skin diseases			X		X
Aloe trichosantha A.Berger	Aloe	trichosantha A.Berger	Asphodelaceae	Ethiopia	leaf (latex)	CM	Shigella flexneri	-	MIC	10	µg/mL	N	353	stomach ailments, gastro-intestinal problems, and skin diseases			X		X
Aloe trichosantha A.Berger	Aloe	trichosantha A.Berger	Asphodelaceae	Ethiopia	leaf (latex)	CM	Shigella sonnei	-	MIC	10	µg/mL	N	353	stomach ailments, gastro-intestinal problems, and skin diseases			X		X
Aloe trichosantha A.Berger	Aloe	trichosantha A.Berger	Asphodelaceae	Ethiopia	leaf (latex)	CM	Bacillus subtilis	+	MIC	25	µg/mL	N	353	stomach ailments, gastro-intestinal problems, and skin diseases			X		X
Aloe trichosantha A.Berger	Aloe	trichosantha A.Berger	Asphodelaceae	Ethiopia	leaf (latex)	CM	Escherichia coli	-	MIC	25	µg/mL	N	353	stomach ailments, gastro-intestinal problems, and skin diseases			X		X
Aloe trichosantha A.Berger	Aloe	trichosantha A.Berger	Asphodelaceae	Ethiopia	leaf (latex)	CM	Salmonella enterica	-	MIC	25	µg/mL	N	353	stomach ailments, gastro-intestinal problems, and skin diseases			X		X
Aloe trichosantha A.Berger	Aloe	trichosantha A.Berger	Asphodelaceae	Ethiopia	leaf (latex)	CM	Salmonella typhi	-	MIC	25	µg/mL	N	353	stomach ailments, gastro-intestinal problems, and skin diseases			X		X
Aloe trichosantha A.Berger	Aloe	trichosantha A.Berger	Asphodelaceae	Ethiopia	leaf (latex)	CM	Shigella dysenteriae	-	MIC	25	µg/mL	N	353	stomach ailments, gastro-intestinal problems, and skin diseases			X		X
Aloe trichosantha A.Berger	Aloe	trichosantha A.Berger	Asphodelaceae	Ethiopia	leaf (latex)	CM	Vibrio cholerae	-	MIC	25	µg/mL	N	353	stomach ailments, gastro-intestinal problems, and skin diseases			X		X
Aloe trichosantha A.Berger	Aloe	trichosantha A.Berger	Asphodelaceae	Ethiopia	leaf (latex)	CM	Bacillus pumilus	+	MIC	50	µg/mL	N	353	stomach ailments, gastro-intestinal problems, and skin diseases			X		X
Aloe trichosantha A.Berger	Aloe	trichosantha A.Berger	Asphodelaceae	Ethiopia	leaf (latex)	CM	Staphylococcus aureus	+	MIC	50	µg/mL	N	353	stomach ailments, gastro-intestinal problems, and skin diseases			X		X
Aloe vera (L.) Burm.f.	Aloe	vera (L.) Burm.f.	Asphodelaceae	Iran	leaf (gel)	None	Pseudomonas aeruginosa	-	MIC	200	µg/mL	Y	188	gastrointestinal disorders, sunburn, and wounds			X		X
Aloe vera (L.) Burm.f.	Aloe	vera (L.) Burm.f.	Asphodelaceae	Sudan	whole plant	CM	Bacillus subtilis	+	MIC	156	µg/mL	Y	211	NS	X
Aloe vera (L.) Burm.f.	Aloe	vera (L.) Burm.f.	Asphodelaceae	Sudan	whole plant	CM	Escherichia coli	-	MIC	313	µg/mL	Y	211	NS	X
Aloe vera (L.) Burm.f.	Aloe	vera (L.) Burm.f.	Asphodelaceae	Sudan	whole plant	CM	Staphylococcus aureus	+	MIC	313	µg/mL	Y	211	NS	X
Aloysia citriodora Palau	Aloysia	citriodora Palau	Verbenaceae	Argentina	NS	CE	Proteus mirabilis	-	MIC	500	µg/mL	Y	91	gastro-intestinal disorders					X
Aloysia citriodora Palau	Aloysia	citriodora Palau	Verbenaceae	Argentina	NS	CE	Pseudomonas aeruginosa	-	MIC	500	µg/mL	Y	91	gastro-intestinal disorders					X
Aloysia citriodora Palau	Aloysia	citriodora Palau	Verbenaceae	Argentina	NS	CE	Staphylococcus aureus (MRSA)	+	MIC	500	µg/mL	Y	91	gastro-intestinal disorders					X
Aloysia citriodora Palau	Aloysia	citriodora Palau	Verbenaceae	Iran	leaf	EO	Bacillus cereus	+	MIC	0.625	µg/mL	Y	305	asthma, spasms, cold, fever, flatulence, colic, diarrhea, indigestion, insomnia, anxiety					X	X				X			X
Aloysia citriodora Palau	Aloysia	citriodora Palau	Verbenaceae	Iran	leaf	EO	Enterobacter aerogenes	-	MIC	0.625	µg/mL	Y	305	asthma, spasms, cold, fever, flatulence, colic, diarrhea, indigestion, insomnia, anxiety					X	X				X			X
Aloysia citriodora Palau	Aloysia	citriodora Palau	Verbenaceae	Iran	leaf	EO	Leuconostoc mesenteroides	+	MIC	0.625	µg/mL	Y	305	asthma, spasms, cold, fever, flatulence, colic, diarrhea, indigestion, insomnia, anxiety					X	X				X			X
Aloysia citriodora Palau	Aloysia	citriodora Palau	Verbenaceae	Iran	leaf	EO	Listeria monocytogenes	+	MIC	0.625	µg/mL	Y	305	asthma, spasms, cold, fever, flatulence, colic, diarrhea, indigestion, insomnia, anxiety					X	X				X			X
Aloysia citriodora Palau	Aloysia	citriodora Palau	Verbenaceae	Iran	leaf	EO	Pseudomonas putida	-	MIC	1.25	µg/mL	Y	305	asthma, spasms, cold, fever, flatulence, colic, diarrhea, indigestion, insomnia, anxiety					X	X				X			X
Aloysia citriodora Palau	Aloysia	citriodora Palau	Verbenaceae	Iran	leaf	EO	Staphylococcus aureus	+	MIC	1.25	µg/mL	Y	305	asthma, spasms, cold, fever, flatulence, colic, diarrhea, indigestion, insomnia, anxiety					X	X				X			X
Aloysia citriodora Palau	Aloysia	citriodora Palau	Verbenaceae	Iran	leaf	EO	Escherichia coli	-	MIC	2.5	µg/mL	Y	305	asthma, spasms, cold, fever, flatulence, colic, diarrhea, indigestion, insomnia, anxiety					X	X				X			X
Aloysia citriodora Palau	Aloysia	citriodora Palau	Verbenaceae	Iran	leaf	EO	Salmonella typhi	-	MIC	2.5	µg/mL	Y	305	asthma, spasms, cold, fever, flatulence, colic, diarrhea, indigestion, insomnia, anxiety					X	X				X			X
Aloysia citriodora Palau	Aloysia	citriodora Palau	Verbenaceae	NS	herb	EO	Staphylococcus aureus	+	MIC	400	µg/mL	Y	440	NS	X
Aloysia gratissima (Gillies & Hook.) Tronc.	Aloysia	gratissima (Gillies & Hook.) Tronc.	Verbenaceae	Brazil	leaf	EO	Fusobacterium nucleatum	-	MIC	125	µg/mL	N	66	antimicrobial activity against oral biofilms												X
Aloysia gratissima (Gillies & Hook.) Tronc.	Aloysia	gratissima (Gillies & Hook.) Tronc.	Verbenaceae	Brazil	leaf	EO	Fusobacterium nucleatum	-	MIC	125	µg/mL	N	66	antimicrobial activity against oral biofilms												X
Aloysia gratissima (Gillies & Hook.) Tronc.	Aloysia	gratissima (Gillies & Hook.) Tronc.	Verbenaceae	Brazil	leaf	EO	Porphyromonas gingivalis	-	MIC	125	µg/mL	N	66	antimicrobial activity against oral biofilms												X
Aloysia gratissima (Gillies & Hook.) Tronc.	Aloysia	gratissima (Gillies & Hook.) Tronc.	Verbenaceae	Brazil	leaf	EO	Porphyromonas gingivalis	-	MIC	250	µg/mL	N	66	antimicrobial activity against oral biofilms												X
Aloysia gratissima (Gillies & Hook.) Tronc.	Aloysia	gratissima (Gillies & Hook.) Tronc.	Verbenaceae	Brazil	leaf	EO	Streptococcus mitis	+	MIC	250	µg/mL	N	66	antimicrobial activity against oral biofilms												X
Aloysia gratissima (Gillies & Hook.) Tronc.	Aloysia	gratissima (Gillies & Hook.) Tronc.	Verbenaceae	Brazil	leaf	EO	Streptococcus mitis	+	MIC	500	µg/mL	N	66	antimicrobial activity against oral biofilms												X
Aloysia gratissima (Gillies & Hook.) Tronc.	Aloysia	gratissima (Gillies & Hook.) Tronc.	Verbenaceae	Brazil	leaf	EO	Streptococcus sanguinis	+	MIC	500	µg/mL	N	66	antimicrobial activity against oral biofilms												X
Aloysia gratissima (Gillies & Hook.) Tronc.	Aloysia	gratissima (Gillies & Hook.) Tronc.	Verbenaceae	Brazil	leaf	EO	Streptococcus sanguinis	+	MIC	500	µg/mL	N	66	antimicrobial activity against oral biofilms												X
Alpinia galanga (L.) Willd.	Alpinia	galanga (L.) Willd.	Zingiberaceae	Thailand	rhizome	CE	Streptococcus mutans	+	MIC	500	µg/mL	Y	216	carminative, skin disease			X		X
Alpinia galanga (L.) Willd.	Alpinia	galanga (L.) Willd.	Zingiberaceae	India	leaf	CM	Vibrio cholerae	-	MIC	500	µg/mL	Y	358	NS	X
Alpinia hainanensis K.Schum.	Alpinia	hainanensis K.Schum.	Zingiberaceae	Austria	seed	CDichl	Campylobacter coli	-	MIC	256	µg/mL	N	231	antiemetic					X
Alpinia hainanensis K.Schum.	Alpinia	hainanensis K.Schum.	Zingiberaceae	Austria	seed	CDichl	Campylobacter jejuni	-	MIC	256	µg/mL	N	231	antiemetic					X
Alpinia oxymitra K.Schum.	Alpinia	oxymitra K.Schum.	Zingiberaceae	Cambodia	pericarp	EO	Haemophilus influenzae	-	MIC	64	µg/mL	N	201	NS	X
Alpinia oxymitra K.Schum.	Alpinia	oxymitra K.Schum.	Zingiberaceae	Cambodia	rhizome	EO	Haemophilus influenzae	-	MIC	128	µg/mL	N	201	NS	X
Alpinia oxymitra K.Schum.	Alpinia	oxymitra K.Schum.	Zingiberaceae	Cambodia	rhizome	EO	Streptococcus pneumoniae	+	MIC	128	µg/mL	N	201	NS	X
Alpinia oxymitra K.Schum.	Alpinia	oxymitra K.Schum.	Zingiberaceae	Cambodia	rhizome	EO	Staphylococcus aureus	+	MIC	256	µg/mL	N	201	NS	X
Alstonia boonei De Wild	Alstonia	boonei De Wild	Apocynaceae	Ghana	leaf	CHex	Mycobacterium smegmatis	+	MIC	250	µg/mL	N	444	Buruli ulcer, wound			X
Alstonia boonei De Wild	Alstonia	boonei De Wild	Apocynaceae	Cameroon	bark	CM	Escherichia coli	-	MIC	128	µg/mL	N	459	NS	X
Alstonia boonei De Wild	Alstonia	boonei De Wild	Apocynaceae	Cameroon	leaf	CM	Klebsiella pneumoniae	-	MIC	256	µg/mL	N	459	NS	X
Alstonia boonei De Wild	Alstonia	boonei De Wild	Apocynaceae	Cameroon	leaf	CM	Staphylococcus aureus	+	MIC	256	µg/mL	N	459	NS	X
Alstonia boonei De Wild	Alstonia	boonei De Wild	Apocynaceae	Cameroon	leaf	CM	Staphylococcus aureus (MRSA)	+	MIC	256	µg/mL	N	459	NS	X
Alstonia scholaris (L.) R. Br.	Alstonia	scholaris (L.) R. Br.	Apocynaceae	India	leaf	CM	Vibrio cholerae	-	MIC	500	µg/mL	N	358	NS	X
Althaea officinalis L.	Althaea	officinalis L.	Malvaceae	Iran	whole plant	CE	Pseudomonas aeruginosa	-	MIC	62.5	µg/mL	N	30	NS	X
Amaranthus hybridus L.	Amaranthus	hybridus L.	Amaranthaceae	Cameroon	leaf, seed	CM	Enterobacter aerogenes	-	MIC	128	µg/mL	N	340	intestinal bleeding, diarrhea and excessive menstruation					X			X
Amaranthus hybridus L.	Amaranthus	hybridus L.	Amaranthaceae	Cameroon	leaf, seed	CM	Enterobacter cloacae	-	MIC	128	µg/mL	N	340	intestinal bleeding, diarrhea and excessive menstruation					X			X
Amaranthus hybridus L.	Amaranthus	hybridus L.	Amaranthaceae	Cameroon	leaf, seed	CM	Escherichia coli	-	MIC	128	µg/mL	N	340	intestinal bleeding, diarrhea and excessive menstruation					X			X
Amaranthus hybridus L.	Amaranthus	hybridus L.	Amaranthaceae	Cameroon	leaf, seed	CM	Escherichia coli	-	MIC	128	µg/mL	N	340	intestinal bleeding, diarrhea and excessive menstruation					X			X
Amaranthus hybridus L.	Amaranthus	hybridus L.	Amaranthaceae	Cameroon	leaf, seed	CM	Providencia stuartii	-	MIC	128	µg/mL	N	340	intestinal bleeding, diarrhea and excessive menstruation					X			X
Amaranthus hybridus L.	Amaranthus	hybridus L.	Amaranthaceae	Cameroon	leaf, seed	CM	Klebsiella pneumoniae	-	MIC	256	µg/mL	N	340	intestinal bleeding, diarrhea and excessive menstruation					X			X
Amaranthus hybridus L.	Amaranthus	hybridus L.	Amaranthaceae	Cameroon	leaf, seed	CM	Pseudomonas aeruginosa	-	MIC	256	µg/mL	N	340	intestinal bleeding, diarrhea and excessive menstruation					X			X
Amaranthus spinosus L.	Amaranthus	spinosus L.	Amaranthaceae	Ethiopia	leaf	CM	Staphylococcus aureus	+	MIC	179	µg/mL	N	28	diarrhea, dysentery, excessive menstrual flow, ulcers and intestinal hemorrhaging			X		X			X
Amaranthus spinosus L.	Amaranthus	spinosus L.	Amaranthaceae	Ethiopia	leaf	CM	Escherichia coli	-	MIC	398	µg/mL	N	28	diarrhea, dysentery, excessive menstrual flow, ulcers and intestinal hemorrhaging			X		X			X
Ammi majus L.	Ammi	majus L.	Apiaceae	Iraq	seed	CPEt	Staphylococcus epidermidis	+	MIC	128	µg/mL	N	20	asthma, stomach ulcer					X								X
Ammi majus L.	Ammi	majus L.	Apiaceae	Iraq	seed	CE	Staphylococcus epidermidis	+	MIC	128	µg/mL	N	20	asthma, stomach ulcer					X								X
Ammi majus L.	Ammi	majus L.	Apiaceae	Iraq	seed	CE	Bacillus cereus	+	MIC	256	µg/mL	N	20	asthma, stomach ulcer					X								X
Ammi majus L.	Ammi	majus L.	Apiaceae	Iraq	seed	CE	Enterococcus faecalis	+	MIC	256	µg/mL	N	20	asthma, stomach ulcer					X								X
Ammi majus L.	Ammi	majus L.	Apiaceae	Iraq	seed	CE	Staphylococcus aureus	+	MIC	256	µg/mL	N	20	asthma, stomach ulcer					X								X
Amoora aphanamixis Schult. & Schult.f.	Amoora	aphanamixis Schult. & Schult.f.	Meliaceae	Indonesia	leaf	CE	Bacillus subtilis	+	MIC	250	µg/mL	N	3	NS	X
Amoora aphanamixis Schult. & Schult.f.	Amoora	aphanamixis Schult. & Schult.f.	Meliaceae	Indonesia	leaf	CE	Escherichia coli	-	MIC	250	µg/mL	N	3	NS	X
Anacardium occidentale L.	Anacardium	occidentale L.	Anacardiaceae	Brazil	bark	CA	Streptococcus mitis	+	MIC	3.125	µg/mL	Y	121	anti-inflammatory, healing, antibacterial, hemostatic			X			X
Anacardium occidentale L.	Anacardium	occidentale L.	Anacardiaceae	Brazil	bark	CA	Streptococcus mutans	+	MIC	3.125	µg/mL	Y	121	anti-inflammatory, healing, antibacterial, hemostatic			X			X
Anacardium occidentale L.	Anacardium	occidentale L.	Anacardiaceae	Brazil	bark	CA	Streptococcus oralis	+	MIC	6.25	µg/mL	Y	121	anti-inflammatory, healing, antibacterial, hemostatic			X			X
Anacardium occidentale L.	Anacardium	occidentale L.	Anacardiaceae	Brazil	bark	CA	Streptococcus salivarius	+	MIC	6.25	µg/mL	Y	121	anti-inflammatory, healing, antibacterial, hemostatic			X			X
Anacardium occidentale L.	Anacardium	occidentale L.	Anacardiaceae	Brazil	bark	CA	Streptococcus sanguinis	+	MIC	6.25	µg/mL	Y	121	anti-inflammatory, healing, antibacterial, hemostatic			X			X
Anacardium occidentale L.	Anacardium	occidentale L.	Anacardiaceae	Brazil	bark	CA	Streptococcus sobrinus	+	MIC	6.25	µg/mL	Y	121	anti-inflammatory, healing, antibacterial, hemostatic			X			X
Anacardium occidentale L.	Anacardium	occidentale L.	Anacardiaceae	Mozambique	leaf	CM	Enterococcus faecalis	+	MIC	7.5	µg/mL	Y	278	dysentery, venereal disease					X					X
Anacardium occidentale L.	Anacardium	occidentale L.	Anacardiaceae	Mozambique	leaf	CM	Staphylococcus aureus	+	MIC	7.5	µg/mL	Y	278	dysentery, venereal disease					X
Anacardium occidentale L.	Anacardium	occidentale L.	Anacardiaceae	Mozambique	leaf	CM	Micrococcus luteus	+	MIC	15	µg/mL	Y	278	dysentery, venereal disease					X					X
Anacardium occidentale L.	Anacardium	occidentale L.	Anacardiaceae	Mozambique	leaf	CHex	Staphylococcus aureus	+	MIC	62.5	µg/mL	Y	278	dysentery, venereal disease					X					X
Anacardium occidentale L.	Anacardium	occidentale L.	Anacardiaceae	Mozambique	leaf	CHex	Enterococcus faecalis	+	MIC	125	µg/mL	Y	278	dysentery, venereal disease					X					X
Anacardium occidentale L.	Anacardium	occidentale L.	Anacardiaceae	Thailand	leaf	CM	Shigella sonnei	-	MIC	310	µg/mL	N	386	NS	X
Andrographis paniculata (Burm.f.) Nees	Andrographis	paniculata (Burm.f.) Nees	Acanthaceae	India	stem	CM	Staphylococcus aureus	+	MIC	500	µg/mL	Y	358	NS	X
Andrographis paniculata (Burm.f.) Nees	Andrographis	paniculata (Burm.f.) Nees	Acanthaceae	India	leaf	CM	Vibrio cholerae	-	MIC	500	µg/mL	Y	358	NS	X
Anethum graveolens L.	Anethum	graveolens L.	Apiaceae	Iraq	seed	CE	Bacillus cereus	+	MIC	128	µg/mL	Y	20	digestion					X
Anethum graveolens L.	Anethum	graveolens L.	Apiaceae	Iraq	seed	CE	Staphylococcus epidermidis	+	MIC	128	µg/mL	Y	20	digestion					X
Anethum graveolens L.	Anethum	graveolens L.	Apiaceae	Iran	seed	EO	Streptococcus iniae	+	MIC	7.8	µg/mL	N	380	flatulence, indigestion, stomachache					X
Anethum graveolens L.	Anethum	graveolens L.	Apiaceae	Iran	seed	CM	Streptococcus iniae	+	MIC	31.2	µg/mL	N	380	flatulence, indigestion, stomachache					X
Anethum graveolens L.	Anethum	graveolens L.	Apiaceae	Bangladesh	root	EO	Acetobacter aceti	-	MIC	62.5	µg/mL	N	387	spice, carminative					X
Anethum graveolens L.	Anethum	graveolens L.	Apiaceae	Bangladesh	root	EO	Enterococcus faecalis	+	MIC	62.5	µg/mL	N	387	spice, carminative					X
Anethum graveolens L.	Anethum	graveolens L.	Apiaceae	Bangladesh	root	EO	Escherichia coli	-	MIC	62.5	µg/mL	N	387	spice, carminative					X
Anethum graveolens L.	Anethum	graveolens L.	Apiaceae	Bangladesh	root	EO	Pseudomonas aeruginosa	-	MIC	62.5	µg/mL	N	387	spice, carminative					X
Anethum graveolens L.	Anethum	graveolens L.	Apiaceae	Bangladesh	root	EO	Salmonella enteritidis	-	MIC	62.5	µg/mL	N	387	spice, carminative					X
Anethum graveolens L.	Anethum	graveolens L.	Apiaceae	Bangladesh	root	EO	Bacillus cereus	+	MIC	125	µg/mL	N	387	spice, carminative					X
Anethum graveolens L.	Anethum	graveolens L.	Apiaceae	Bangladesh	root	EO	Bacillus subtilis	+	MIC	125	µg/mL	N	387	spice, carminative					X
Anethum graveolens L.	Anethum	graveolens L.	Apiaceae	Bangladesh	root	EO	Staphylococcus aureus	+	MIC	125	µg/mL	N	387	spice, carminative					X
Anethum graveolens L.	Anethum	graveolens L.	Apiaceae	Bangladesh	root	EO	Escherichia coli	-	MIC	250	µg/mL	N	387	spice, carminative					X
Anethum graveolens L.	Anethum	graveolens L.	Apiaceae	Bangladesh	root	EO	Salmonella typhi	-	MIC	250	µg/mL	N	387	spice, carminative					X
Anethum graveolens L.	Anethum	graveolens L.	Apiaceae	Tunisia	aerial part	EO	Aeromonas hydrophila	-	MIC	50	µg/mL	N	417	seeds use for gastrointestinal problems (carminative, stomachic) and rheumatism					X				X
Anethum graveolens L.	Anethum	graveolens L.	Apiaceae	Tunisia	aerial part	EO	Enterobacter cloacae	-	MIC	50	µg/mL	N	417	seeds use for gastrointestinal problems (carminative, stomachic) and rheumatism					X				X
Anethum graveolens L.	Anethum	graveolens L.	Apiaceae	Tunisia	aerial part	EO	Raoultella ornithinolytica	-	MIC	50	µg/mL	N	417	seeds use for gastrointestinal problems (carminative, stomachic) and rheumatism					X				X
Anethum graveolens L.	Anethum	graveolens L.	Apiaceae	Tunisia	aerial part	EO	Staphylococcus lentus	+	MIC	50	µg/mL	N	417	seeds use for gastrointestinal problems (carminative, stomachic) and rheumatism					X				X
Anethum graveolens L.	Anethum	graveolens L.	Apiaceae	Tunisia	aerial part	EO	Staphylococcus sciuri	+	MIC	50	µg/mL	N	417	seeds use for gastrointestinal problems (carminative, stomachic) and rheumatism					X				X
Anethum graveolens L.	Anethum	graveolens L.	Apiaceae	Tunisia	aerial part	EO	Serratia odorifera	-	MIC	100	µg/mL	N	417	seeds use for gastrointestinal problems (carminative, stomachic) and rheumatism					X				X
Anethum graveolens L.	Anethum	graveolens L.	Apiaceae	Tunisia	aerial part	EO	Klebsiella oxytoca	-	MIC	100	µg/mL	N	417	seeds use for gastrointestinal problems (carminative, stomachic) and rheumatism					X				X
Anethum graveolens L.	Anethum	graveolens L.	Apiaceae	Tunisia	aerial part	EO	Staphylococcus lugdunensis	+	MIC	100	µg/mL	N	417	seeds use for gastrointestinal problems (carminative, stomachic) and rheumatism					X				X
Anethum graveolens L.	Anethum	graveolens L.	Apiaceae	Tunisia	aerial part	EO	Staphylococcus xylosus	+	MIC	100	µg/mL	N	417	seeds use for gastrointestinal problems (carminative, stomachic) and rheumatism					X				X
Anethum graveolens L.	Anethum	graveolens L.	Apiaceae	Tunisia	aerial part	EO	Vibrio alginolyticus	-	MIC	100	µg/mL	N	417	seeds use for gastrointestinal problems (carminative, stomachic) and rheumatism					X				X
Angelica archangelica L.	Angelica	archangelica L.	Apiaceae	Serbia	root	EO	Staphylococcus aureus	+	MIC	14.2	μL/mL	Y	7	gastrointestinal disorders					X
Angelica archangelica L.	Angelica	archangelica L.	Apiaceae	Serbia	root	EO	Escherichia coli	-	MIC	28.4	μL/mL	Y	7	gastrointestinal disorders					X
Angelica archangelica L.	Angelica	archangelica L.	Apiaceae	NS	root	EO	Staphylococcus aureus	+	MIC	400	µg/mL	Y	440	NS	X
Angelica shikokiana Makino ex Y.Yabe	Angelica	shikokiana Makino ex Y.Yabe	Apiaceae	Japan	root	CE	Staphylococcus aureus	+	MIC	400	µg/mL	N	298	antitumor, circulatory system disorders, digestive system disorders, liver dysfunction		X			X	X
Angelica shikokiana Makino ex Y.Yabe	Angelica	shikokiana Makino ex Y.Yabe	Apiaceae	Japan	stem	CE	Staphylococcus aureus	+	MIC	400	µg/mL	N	298	antitumor, circulatory system disorders, digestive system disorders, liver dysfunction		X			X	X
Annickia chlorantha (Oliv.) Setten & Maas	Annickia	chlorantha (Oliv.) Setten & Maas	Annonaceae	Cameroon	stem bark	CM	Mycobacterium smegmatis	+	MIC	125	µg/mL	N	444	Buruli ulcer, wound			X
Annickia chlorantha (Oliv.) Setten & Maas	Annickia	chlorantha (Oliv.) Setten & Maas	Annonaceae	Cameroon	stem bark	CM	Mycobacterium ulcerans	+	MIC	250	µg/mL	N	444	Buruli ulcer, wound			X
Annona muricata L.	Annona	muricata L.	Annonaceae	Cameroon	leaf	CM	Escherichia coli	-	MIC	256	µg/mL	N	141	NS	X
Annona muricata L.	Annona	muricata L.	Annonaceae	Cameroon	leaf	CM	Klebsiella pneumoniae	-	MIC	256	µg/mL	N	141	NS	X
Annona muricata L.	Annona	muricata L.	Annonaceae	Cameroon	root	CE	Mycobacterium smegmatis	+	MIC	125	µg/mL	Y	444	Buruli ulcer, wound			X
Annona muricata L.	Annona	muricata L.	Annonaceae	Cameroon	stem	CM	Mycobacterium smegmatis	+	MIC	250	µg/mL	Y	444	Buruli ulcer, wound			X
Annona muricata L.	Annona	muricata L.	Annonaceae	Cameroon	root	CM	Mycobacterium smegmatis	+	MIC	250	µg/mL	Y	444	Buruli ulcer, wound			X
Annona reticulata L.	Annona	reticulata L.	Annonaceae	Cameroon	fruit	CE	Mycobacterium smegmatis	+	MIC	31	µg/mL	N	444	Buruli ulcer, wound			X
Annona reticulata L.	Annona	reticulata L.	Annonaceae	Cameroon	fruit	CDichl	Mycobacterium smegmatis	+	MIC	31	µg/mL	N	444	Buruli ulcer, wound			X
Annona reticulata L.	Annona	reticulata L.	Annonaceae	Cameroon	stem bark	CDichl	Mycobacterium smegmatis	+	MIC	63	µg/mL	N	444	Buruli ulcer, wound			X
Annona reticulata L.	Annona	reticulata L.	Annonaceae	Cameroon	stem bark	CE	Mycobacterium smegmatis	+	MIC	125	µg/mL	N	444	Buruli ulcer, wound			X
Annona reticulata L.	Annona	reticulata L.	Annonaceae	Cameroon	root	CDichl	Mycobacterium smegmatis	+	MIC	125	µg/mL	N	444	Buruli ulcer, wound			X
Annona reticulata L.	Annona	reticulata L.	Annonaceae	Cameroon	root	CE	Mycobacterium smegmatis	+	MIC	250	µg/mL	N	444	Buruli ulcer, wound			X
Annona reticulata L.	Annona	reticulata L.	Annonaceae	Cameroon	fruit	CDichl	Mycobacterium ulcerans	+	MIC	250	µg/mL	N	444	Buruli ulcer, wound			X
Annona reticulata L.	Annona	reticulata L.	Annonaceae	Cameroon	root	CDichl	Mycobacterium ulcerans	+	MIC	250	µg/mL	N	444	Buruli ulcer, wound			X
Annona reticulata L.	Annona	reticulata L.	Annonaceae	Cameroon	root	CE	Mycobacterium ulcerans	+	MIC	250	µg/mL	N	444	Buruli ulcer, wound			X
Annona senegalensis Pers.	Annona	senegalensis Pers.	Annonaceae	South Africa	root	CDichl/M	Brevibacterium agri	+	MIC	130	µg/mL	N	327	NS	X
Annona senegalensis Pers.	Annona	senegalensis Pers.	Annonaceae	South Africa	root	CDichl/M	Brevibacterium linens	+	MIC	130	µg/mL	N	327	NS	X
Annona senegalensis Pers.	Annona	senegalensis Pers.	Annonaceae	South Africa	root	CDichl/M	Cutibacterium acnes	+	MIC	130	µg/mL	N	327	NS	X
Annona senegalensis Pers.	Annona	senegalensis Pers.	Annonaceae	South Africa	root	CDichl/M	Pseudomonas aeruginosa	-	MIC	250	µg/mL	N	327	NS	X
Annona senegalensis Pers.	Annona	senegalensis Pers.	Annonaceae	South Africa	root	CDichl/M	Escherichia coli	-	MIC	500	µg/mL	N	327	NS	X
Annona senegalensis Pers.	Annona	senegalensis Pers.	Annonaceae	South Africa	root	CDichl/M	Staphylococcus aureus (MRSA)	+	MIC	500	µg/mL	N	327	NS	X
Annona senegalensis Pers.	Annona	senegalensis Pers.	Annonaceae	Cameroon	stem	CDichl	Mycobacterium smegmatis	+	MIC	31	µg/mL	N	444	Buruli ulcer, wound			X
Annona senegalensis Pers.	Annona	senegalensis Pers.	Annonaceae	Cameroon	stem	CDichl	Mycobacterium ulcerans	+	MIC	250	µg/mL	N	444	Buruli ulcer, wound			X
Annona squamosa L.	Annona	squamosa L.	Annonaceae	Thailand	leaf	CE	Staphylococcus aureus	+	MIC	62.5	µg/mL	Y	133	diarrhea, dystentry					X
Annona squamosa L.	Annona	squamosa L.	Annonaceae	Thailand	leaf	CE	Listeria monocytogenes	+	MIC	125	µg/mL	Y	133	diarrhea, dystentry					X
Annona squamosa L.	Annona	squamosa L.	Annonaceae	Thailand	leaf	CE	Bacillus cereus	+	MIC	250	µg/mL	Y	133	diarrhea, dystentry					X
Annona squamosa L.	Annona	squamosa L.	Annonaceae	Thailand	leaf	CE	Campylobacter jejuni	-	MIC	250	µg/mL	Y	133	diarrhea, dystentry					X		X
Annona sylvatica A.St.-Hil.	Annona	sylvatica A.St.-Hil.	Annonaceae	Brazil	leaf	Fr.	Mycobacterium tuberculosis	+	MIC	115.2	µg/mL	N	34	antitussive, antipyretic, antispasmodic						X			X				X
Anogeissus leiocarpa (DC.) Guill. & Perr.	Anogeissus	leiocarpa (DC.) Guill. & Perr.	Combretaceae	Nigeria	root	CA	Mycobacterium abscessus	+	MIC	310	µg/mL	N	253	Cough and tuberculosis						X							X
Anogeissus leiocarpa (DC.) Guill. & Perr.	Anogeissus	leiocarpa (DC.) Guill. & Perr.	Combretaceae	Nigeria	root	CA	Mycobacterium phlei	+	MIC	310	µg/mL	N	253	Cough and tuberculosis						X							X
Anogeissus leiocarpa (DC.) Guill. & Perr.	Anogeissus	leiocarpa (DC.) Guill. & Perr.	Combretaceae	Nigeria	root	CA	Mycobacterium smegmatis	+	MIC	310	µg/mL	N	253	Cough and tuberculosis						X							X
Anogeissus leiocarpa (DC.) Guill. & Perr.	Anogeissus	leiocarpa (DC.) Guill. & Perr.	Combretaceae	Nigeria	root	CA	Mycobacterium smegmatis	+	MIC	310	µg/mL	N	253	Cough and tuberculosis						X							X
Antidesma bunius (L.) Spreng.	Antidesma	bunius (L.) Spreng.	Phyllanthaceae	Indonesia	leaf	CE	Escherichia coli	-	MIC	250	µg/mL	N	3	NS	X
Antidesma bunius (L.) Spreng.	Antidesma	bunius (L.) Spreng.	Phyllanthaceae	Indonesia	leaf	CE	Bacillus subtilis	+	MIC	500	µg/mL	N	3	NS	X
Apium graveolens L.	Apium	graveolens L.	Apiaceae	Iraq	seed	CE	Enterococcus faecalis	+	MIC	128	µg/mL	Y	20	UTI							X
Apium graveolens L.	Apium	graveolens L.	Apiaceae	Iraq	seed	CPEt	Enterococcus faecalis	+	MIC	256	µg/mL	Y	20	UTI							X
Apium graveolens L.	Apium	graveolens L.	Apiaceae	Iraq	seed	CE	Staphylococcus aureus	+	MIC	256	µg/mL	Y	20	UTI							X
Apium graveolens L.	Apium	graveolens L.	Apiaceae	Iraq	seed	CE	Staphylococcus epidermidis	+	MIC	256	µg/mL	Y	20	UTI							X
Apium graveolens L.	Apium	graveolens L.	Apiaceae	Algeria	aerial part	EO	Escherichia coli	-	MIC	10	µg/mL	N	47	opthalmia treatment											X
Apium graveolens L.	Apium	graveolens L.	Apiaceae	Algeria	aerial part	EO	Staphylococcus aureus	+	MIC	60	µg/mL	N	47	opthalmia treatment											X
Apium graveolens L.	Apium	graveolens L.	Apiaceae	Algeria	aerial part	EO	Pseudomonas aeruginosa	-	MIC	125	µg/mL	N	47	opthalmia treatment											X
Apodytes dimidiata E.Mey. ex Arn.	Apodytes	dimidiata E.Mey. ex Arn.	Icacinaceae	South Africa	leaf	CDichl	Micrococcus luteus	+	MIC	100	µg/mL	N	234	Tuberculosis related symptoms such as persistent coughing, weight loss, sweating at night and blood in the sputum						X							X
Arbutus unedo L.	Arbutus	unedo L.	Ericaceae	Italy	leaf	CM	Staphylococcus epidermidis	+	IC50	10.1	µg/mL	N	284	NS	X
Arbutus unedo L.	Arbutus	unedo L.	Ericaceae	Italy	leaf	CM	Staphylococcus aureus	+	IC50	31.9	µg/mL	N	284	NS	X
Arbutus unedo L.	Arbutus	unedo L.	Ericaceae	Italy	leaf	CM	Klebsiella pneumoniae	-	IC50	93.8	µg/mL	N	284	NS	X
Ardisia humilis Vahl	Ardisia	humilis Vahl	Primulaceae	Indonesia	leaf	CE	Bacillus subtilis	+	MIC	250	µg/mL	N	3	NS	X
Ardisia humilis Vahl	Ardisia	humilis Vahl	Primulaceae	Indonesia	leaf	CE	Escherichia coli	-	MIC	250	µg/mL	N	3	NS	X
Aristea ecklonii Baker	Aristea	ecklonii Baker	Iridaceae	South Africa	root	CDichl	Staphylococcus aureus	+	MIC	10	µg/mL	N	273	treatment of shingles, coughs, fevers, and syphilis						X		X					X
Aristea ecklonii Baker	Aristea	ecklonii Baker	Iridaceae	South Africa	root	CDichl	Cutibacterium acnes	+	MIC	30	µg/mL	N	273	treatment of shingles, coughs, fevers, and syphilis						X		X					X
Aristea ecklonii Baker	Aristea	ecklonii Baker	Iridaceae	South Africa	leaf	CDichl	Cutibacterium acnes	+	MIC	50	µg/mL	N	273	treatment of shingles, coughs, fevers, and syphilis						X		X					X
Aristea ecklonii Baker	Aristea	ecklonii Baker	Iridaceae	South Africa	root	CDichl	Staphylococcus aureus (GMRSA)	+	MIC	50	µg/mL	N	273	treatment of shingles, coughs, fevers, and syphilis						X		X					X
Aristea ecklonii Baker	Aristea	ecklonii Baker	Iridaceae	South Africa	root	CDichl	Staphylococcus aureus (MRSA)	+	MIC	50	µg/mL	N	273	treatment of shingles, coughs, fevers, and syphilis						X		X					X
Aristea ecklonii Baker	Aristea	ecklonii Baker	Iridaceae	South Africa	root	CDichl	Staphylococcus epidermidis	+	MIC	50	µg/mL	N	273	treatment of shingles, coughs, fevers, and syphilis						X		X					X
Aristea ecklonii Baker	Aristea	ecklonii Baker	Iridaceae	South Africa	leaf	CDichl	Staphylococcus epidermidis	+	MIC	100	µg/mL	N	273	treatment of shingles, coughs, fevers, and syphilis						X		X					X
Aristea ecklonii Baker	Aristea	ecklonii Baker	Iridaceae	South Africa	root	CDichl	Pseudomonas aeruginosa	-	MIC	200	µg/mL	N	273	treatment of shingles, coughs, fevers, and syphilis						X		X					X
Aristea ecklonii Baker	Aristea	ecklonii Baker	Iridaceae	South Africa	leaf	CDichl	Staphylococcus aureus	+	MIC	200	µg/mL	N	273	treatment of shingles, coughs, fevers, and syphilis						X		X					X
Aristea ecklonii Baker	Aristea	ecklonii Baker	Iridaceae	South Africa	leaf	CDichl	Staphylococcus aureus (GMRSA)	+	MIC	200	µg/mL	N	273	treatment of shingles, coughs, fevers, and syphilis						X		X					X
Aristea ecklonii Baker	Aristea	ecklonii Baker	Iridaceae	South Africa	leaf	CDichl	Staphylococcus aureus (MRSA)	+	MIC	200	µg/mL	N	273	treatment of shingles, coughs, fevers, and syphilis						X		X					X
Aristolochia delavayi Franch.	Aristolochia	delavayi Franch.	Aristolochiaceae	China	aerial part	EO	Providencia stuartii	-	MIC	3.9	µg/mL	N	260	NS	X
Aristolochia delavayi Franch.	Aristolochia	delavayi Franch.	Aristolochiaceae	China	aerial part	EO	Escherichia coli	-	MIC	15.62	µg/mL	N	260	NS	X
Aristolochia delavayi Franch.	Aristolochia	delavayi Franch.	Aristolochiaceae	China	aerial part	EO	Salmonella typhi	-	MIC	125	µg/mL	N	260	NS	X
Aristolochia delavayi Franch.	Aristolochia	delavayi Franch.	Aristolochiaceae	China	aerial part	EO	Enterobacter aerogenes	-	MIC	250	µg/mL	N	260	NS	X
Aristolochia delavayi Franch.	Aristolochia	delavayi Franch.	Aristolochiaceae	China	aerial part	EO	Enterococcus faecalis	+	MIC	250	µg/mL	N	260	NS	X
Aristolochia delavayi Franch.	Aristolochia	delavayi Franch.	Aristolochiaceae	China	aerial part	EO	Pseudomonas aeruginosa	-	MIC	250	µg/mL	N	260	NS	X
Aristolochia delavayi Franch.	Aristolochia	delavayi Franch.	Aristolochiaceae	China	aerial part	EO	Staphylococcus aureus	+	MIC	250	µg/mL	N	260	NS	X
Aristolochia labiata Willd.	Aristolochia	labiata Willd.	Aristolochiaceae	Brazil	rhizome	CE	Staphylococcus aureus	+	MIC	250	µg/mL	N	21	antimicrobial, cytotoxicity						X
Aristolochia labiata Willd.	Aristolochia	labiata Willd.	Aristolochiaceae	Brazil	rhizome	CE	Enterococcus faecalis	+	MIC	500	µg/mL	N	21	antimicrobial, cytotoxicity						X
Aristolochia labiata Willd.	Aristolochia	labiata Willd.	Aristolochiaceae	Brazil	rhizome	CDichl	Staphylococcus aureus	+	MIC	500	µg/mL	N	21	antimicrobial, cytotoxicity						X
Aristolochia labiata Willd.	Aristolochia	labiata Willd.	Aristolochiaceae	Brazil	rhizome	CHex	Staphylococcus epidermidis	+	MIC	500	µg/mL	N	21	antimicrobial, cytotoxicity						X
Aristolochia labiata Willd.	Aristolochia	labiata Willd.	Aristolochiaceae	Brazil	rhizome	CE	Streptococcus mutans	+	MIC	500	µg/mL	N	21	antimicrobial, cytotoxicity						X
Artabotrys rufus De Wild.	Artabotrys	rufus De Wild.	Annonaceae	Cameroon	leaf	CDichl	Mycobacterium smegmatis	+	MIC	125	µg/mL	N	444	Buruli ulcer, wound			X
Artabotrys rufus De Wild.	Artabotrys	rufus De Wild.	Annonaceae	Cameroon	stem	CE	Mycobacterium smegmatis	+	MIC	250	µg/mL	N	444	Buruli ulcer, wound			X
Artemisia abyssinica Sch.Bip. ex A.Rich.	Artemisia	abyssinica Sch.Bip. ex A.Rich.	Asteraceae	Ethiopia	leaf	CM	Mycobacterium tuberculosis	+	MIC	6.25	µg/mL	N	175	Cough and tuberculosis treatment						X							X
Artemisia abyssinica Sch.Bip. ex A.Rich.	Artemisia	abyssinica Sch.Bip. ex A.Rich.	Asteraceae	Ethiopia	leaf	CM	Mycobacterium bovis	+	MIC	12.5	µg/mL	N	175	Cough and tuberculosis treatment						X							X
Artemisia fragrans Willd.	Artemisia	fragrans Willd.	Asteraceae	Iran	aerial part	EO	Bacillus subtilis	+	MIC	500	µg/mL	N	384	NS	X
Artemisia fragrans Willd.	Artemisia	fragrans Willd.	Asteraceae	Iran	aerial part	EO	Escherichia coli	-	MIC	500	µg/mL	N	384	NS	X
Artemisia fragrans Willd.	Artemisia	fragrans Willd.	Asteraceae	Iran	aerial part	EO	Klebsiella pneumoniae	-	MIC	500	µg/mL	N	384	NS	X
Artemisia fragrans Willd.	Artemisia	fragrans Willd.	Asteraceae	Iran	aerial part	EO	Proteus vulgaris	-	MIC	500	µg/mL	N	384	NS	X
Artemisia fragrans Willd.	Artemisia	fragrans Willd.	Asteraceae	Iran	aerial part	EO	Salmonella paratyphi (A serotype)	-	MIC	500	µg/mL	N	384	NS	X
Artemisia fragrans Willd.	Artemisia	fragrans Willd.	Asteraceae	Iran	aerial part	EO	Shigella dysenteriae	-	MIC	500	µg/mL	N	384	NS	X
Artemisia fragrans Willd.	Artemisia	fragrans Willd.	Asteraceae	Iran	aerial part	EO	Staphylococcus aureus	+	MIC	500	µg/mL	N	384	NS	X
Artemisia fragrans Willd.	Artemisia	fragrans Willd.	Asteraceae	Iran	aerial part	EO	Staphylococcus epidermidis	+	MIC	500	µg/mL	N	384	NS	X
Artemisia herba-alba Asso	Artemisia	herba-alba Asso	Asteraceae	Tunisia	aerial part	EO	Legionella pneumophila	-	MIC	230	µg/mL	N	92	NS	X
Artemisia indica Willd.	Artemisia	indica Willd.	Asteraceae	Pakistan	aerial part	EO	Staphylococcus aureus	+	MIC	16	µg/mL	N	372	alleviate chronic fever, dyspepsia and hepatobilary ailments					X	X
Artemisia indica Willd.	Artemisia	indica Willd.	Asteraceae	Pakistan	aerial part	EO	Klebsiella pneumoniae	-	MIC	32	µg/mL	N	372	alleviate chronic fever, dyspepsia and hepatobilary ailments					X	X
Artemisia indica Willd.	Artemisia	indica Willd.	Asteraceae	Pakistan	aerial part	EO	Pseudomonas aeruginosa	-	MIC	32	µg/mL	N	372	alleviate chronic fever, dyspepsia and hepatobilary ailments					X	X
Artemisia indica Willd.	Artemisia	indica Willd.	Asteraceae	Pakistan	aerial part	EO	Bacillus subtilis	+	MIC	64	µg/mL	N	372	alleviate chronic fever, dyspepsia and hepatobilary ailments					X	X
Artemisia indica Willd.	Artemisia	indica Willd.	Asteraceae	Pakistan	aerial part	EO	Salmonella typhi	-	MIC	64	µg/mL	N	372	alleviate chronic fever, dyspepsia and hepatobilary ailments					X	X
Artemisia indica Willd.	Artemisia	indica Willd.	Asteraceae	Pakistan	aerial part	EO	Staphylococcus epidermidis	+	MIC	64	µg/mL	N	372	alleviate chronic fever, dyspepsia and hepatobilary ailments					X	X
Artemisia indica Willd.	Artemisia	indica Willd.	Asteraceae	Pakistan	aerial part	EO	Shigella dysenteriae	-	MIC	128	µg/mL	N	372	alleviate chronic fever, dyspepsia and hepatobilary ailments					X	X
Artemisia vestita Wall. ex Besser	Artemisia	vestita Wall. ex Besser	Asteraceae	China	aerial part	EO	Streptococcus pyogenes	+	MIC	20	µg/mL	Y	469	inflammatory diseases						X
Artemisia vestita Wall. ex Besser	Artemisia	vestita Wall. ex Besser	Asteraceae	China	aerial part	EO	Haemophilus influenzae	-	MIC	26	µg/mL	Y	469	inflammatory diseases						X
Artemisia vestita Wall. ex Besser	Artemisia	vestita Wall. ex Besser	Asteraceae	China	aerial part	EO	Streptococcus pneumoniae	+	MIC	32	µg/mL	Y	469	inflammatory diseases						X
Artemisia vestita Wall. ex Besser	Artemisia	vestita Wall. ex Besser	Asteraceae	China	aerial part	EO	Staphylococcus aureus (MSSA)	+	MIC	65	µg/mL	Y	469	inflammatory diseases						X
Artemisia vestita Wall. ex Besser	Artemisia	vestita Wall. ex Besser	Asteraceae	China	aerial part	EO	Klebsiella pneumoniae	-	MIC	80	µg/mL	Y	469	inflammatory diseases						X
Asparagus adscendens Roxb.	Asparagus	adscendens Roxb.	Asparagaceae	Pakistan	root	CM	Bacillus subtilis	+	MIC	39	µg/mL	N	227	NS	X
Asparagus adscendens Roxb.	Asparagus	adscendens Roxb.	Asparagaceae	Pakistan	root	CM	Micrococcus luteus	+	MIC	310	µg/mL	N	227	NS	X
Asphodelus tenuifolius Cav.	Asphodelus	tenuifolius Cav.	Asphodelaceae	Tunisia	aerial part	CM	Pseudomonas aeruginosa	-	MIC	150	µg/mL	N	157	NS	X
Asphodelus tenuifolius Cav.	Asphodelus	tenuifolius Cav.	Asphodelaceae	Tunisia	aerial part	CEtOAc	Pseudomonas aeruginosa	-	MIC	150	µg/mL	N	157	NS	X
Asphodelus tenuifolius Cav.	Asphodelus	tenuifolius Cav.	Asphodelaceae	Tunisia	aerial part	CBuOH	Pseudomonas aeruginosa	-	MIC	150	µg/mL	N	157	NS	X
Asteriscus graveolens (Forssk.) Less.	Asteriscus	graveolens (Forssk.) Less.	Asteraceae	Algeria	aerial part	EO	Proteus mirabilis	-	MIC	39	µg/mL	N	94	heart dis- ease, antispasmodic, hypoglycemic, herbal tea, ﬂavoring agent		X		X
Asteriscus graveolens (Forssk.) Less.	Asteriscus	graveolens (Forssk.) Less.	Asteraceae	Algeria	aerial part	EO	Staphylococcus aureus	+	MIC	39	µg/mL	N	94	heart dis- ease, antispasmodic, hypoglycemic, herbal tea, ﬂavoring agent		X		X
Asteriscus graveolens (Forssk.) Less.	Asteriscus	graveolens (Forssk.) Less.	Asteraceae	Algeria	aerial part	EO	Acinetobacter baumannii	-	MIC	312	µg/mL	N	94	heart dis- ease, antispasmodic, hypoglycemic, herbal tea, ﬂavoring agent		X		X
Asteriscus graveolens (Forssk.) Less.	Asteriscus	graveolens (Forssk.) Less.	Asteraceae	Algeria	aerial part	EO	Bacillus cereus	+	MIC	312	µg/mL	N	94	heart dis- ease, antispasmodic, hypoglycemic, herbal tea, ﬂavoring agent		X		X
Asteriscus graveolens (Forssk.) Less.	Asteriscus	graveolens (Forssk.) Less.	Asteraceae	Algeria	aerial part	EO	Escherichia coli	-	MIC	312	µg/mL	N	94	heart dis- ease, antispasmodic, hypoglycemic, herbal tea, ﬂavoring agent		X		X
Asteriscus imbricatus (Cav.) DC.	Asteriscus	imbricatus (Cav.) DC.	Asteraceae	Morocco	aerial part	EO	Salmonella sp.	-	MIC	400	µg/mL	N	9	NS	X
Astilbe rivularis Buch.-Ham. ex D.Don	Astilbe	rivularis Buch.-Ham. ex D.Don	Saxifragaceae	Nepal	leaf	CAcet	Bacillus subtilis	+	MIC	4	µg/mL	N	180	dysentery, muscular swelling, prolapse of uterus, hemorrhages		X			X			X	X
Astilbe rivularis Buch.-Ham. ex D.Don	Astilbe	rivularis Buch.-Ham. ex D.Don	Saxifragaceae	Nepal	leaf	CAcet	Bacillus megaterium	+	MIC	8	µg/mL	N	180	dysentery, muscular swelling, prolapse of uterus, hemorrhages		X			X			X	X
Astilbe rivularis Buch.-Ham. ex D.Don	Astilbe	rivularis Buch.-Ham. ex D.Don	Saxifragaceae	Nepal	leaf	CAcet	Escherichia coli	-	MIC	8	µg/mL	N	180	dysentery, muscular swelling, prolapse of uterus, hemorrhages		X			X			X	X
Astilbe rivularis Buch.-Ham. ex D.Don	Astilbe	rivularis Buch.-Ham. ex D.Don	Saxifragaceae	Nepal	leaf	CAcet	Shigella dysenteriae	-	MIC	16	µg/mL	N	180	dysentery, muscular swelling, prolapse of uterus, hemorrhages		X			X			X	X
Astilbe rivularis Buch.-Ham. ex D.Don	Astilbe	rivularis Buch.-Ham. ex D.Don	Saxifragaceae	Nepal	leaf	CAcet	Staphylococcus aureus	+	MIC	16	µg/mL	N	180	dysentery, muscular swelling, prolapse of uterus, hemorrhages		X			X			X	X
Astilbe rivularis Buch.-Ham. ex D.Don	Astilbe	rivularis Buch.-Ham. ex D.Don	Saxifragaceae	Nepal	leaf	CAcet	Pseudomonas aeruginosa	-	MIC	32	µg/mL	N	180	dysentery, muscular swelling, prolapse of uterus, hemorrhages		X			X			X	X
Astilbe rivularis Buch.-Ham. ex D.Don	Astilbe	rivularis Buch.-Ham. ex D.Don	Saxifragaceae	Nepal	leaf	CAcet	Streptococcus pyogenes	+	MIC	32	µg/mL	N	180	dysentery, muscular swelling, prolapse of uterus, hemorrhages		X			X			X	X
Astilbe rivularis Buch.-Ham. ex D.Don	Astilbe	rivularis Buch.-Ham. ex D.Don	Saxifragaceae	Nepal	leaf	CAcet	Salmonella typhi	-	MIC	64	µg/mL	N	180	dysentery, muscular swelling, prolapse of uterus, hemorrhages		X			X			X	X
Austrostipa sp.	Austrostipa	sp.	Poaceae	Australia	leaf	CE	Campylobacter jejuni	-	MIC	256	µg/mL	N	243	NS	X
Avicennia marina (Forssk.) Vierh.	Avicennia	marina (Forssk.) Vierh.	Acanthaceae	Thailand	leaf	CE	Streptococcus mutans	+	MIC	62.5	µg/mL	N	216	diuretic							X
Ayapana triplinervis (Vahl) R.M.King & H.Rob.	Ayapana	triplinervis (Vahl) R.M.King & H.Rob.	Asteraceae	India	aerial part	CA	Salmonella typhimurium	-	MIC	128	µg/mL	N	418	NS	X
Ayapana triplinervis (Vahl) R.M.King & H.Rob.	Ayapana	triplinervis (Vahl) R.M.King & H.Rob.	Asteraceae	India	aerial part	CE	Salmonella typhimurium	-	MIC	128	µg/mL	N	418	NS	X
Ayapana triplinervis (Vahl) R.M.King & H.Rob.	Ayapana	triplinervis (Vahl) R.M.King & H.Rob.	Asteraceae	India	aerial part	CA	Staphylococcus aureus	+	MIC	128	µg/mL	N	418	NS	X
Ayapana triplinervis (Vahl) R.M.King & H.Rob.	Ayapana	triplinervis (Vahl) R.M.King & H.Rob.	Asteraceae	India	aerial part	CA	Bacillus subtilis	+	MIC	256	µg/mL	N	418	NS	X
Ayapana triplinervis (Vahl) R.M.King & H.Rob.	Ayapana	triplinervis (Vahl) R.M.King & H.Rob.	Asteraceae	India	aerial part	CE	Escherichia coli	-	MIC	256	µg/mL	N	418	NS	X
Ayapana triplinervis (Vahl) R.M.King & H.Rob.	Ayapana	triplinervis (Vahl) R.M.King & H.Rob.	Asteraceae	India	aerial part	CE	Staphylococcus aureus	+	MIC	256	µg/mL	N	418	NS	X
Azadirachta indica A.Juss.	Azadirachta	indica A.Juss.	Meliaceae	India	leaf	CE	Klebsiella sp.	-	MIC	213.3	µg/mL	N	239	NS	X
Azadirachta indica A.Juss.	Azadirachta	indica A.Juss.	Meliaceae	India	leaf	CM	Bacillus cereus	+	MIC	250	µg/mL	Y	358	NS	X
Azadirachta indica A.Juss.	Azadirachta	indica A.Juss.	Meliaceae	India	leaf	CM	Shigella flexneri	-	MIC	250	µg/mL	Y	358	NS	X
Azadirachta indica A.Juss.	Azadirachta	indica A.Juss.	Meliaceae	India	leaf	CM	Staphylococcus aureus	+	MIC	250	µg/mL	Y	358	NS	X
Azadirachta indica A.Juss.	Azadirachta	indica A.Juss.	Meliaceae	India	leaf	CM	Vibrio cholerae	-	MIC	250	µg/mL	Y	358	NS	X
Azadirachta indica A.Juss.	Azadirachta	indica A.Juss.	Meliaceae	NS	seed	EO	Staphylococcus aureus	+	MIC	50	µg/mL	Y	440	NS	X
Azadirachta indica A.Juss.	Azadirachta	indica A.Juss.	Meliaceae	Ghana	stem bark	CHex	Mycobacterium smegmatis	+	MIC	250	µg/mL	Y	444	Buruli ulcer, wound			X
Azorella trifurcata (Gaertn.) Pers.	Azorella	trifurcata (Gaertn.) Pers.	Apiaceae	Argentina	aerial part	EO	Pseudomonas sp.	-	MIC	500	µg/mL	N	271	repellant against Chagas disease						X
Baccharis dracunculifolia DC.	Baccharis	dracunculifolia DC.	Asteraceae	Brazil	leaf	EO	Fusobacterium nucleatum	-	MIC	125	µg/mL	N	66	antimicrobial activity against oral biofilms												X
Baccharis dracunculifolia DC.	Baccharis	dracunculifolia DC.	Asteraceae	Brazil	leaf	EO	Porphyromonas gingivalis	-	MIC	125	µg/mL	N	66	antimicrobial activity against oral biofilms												X
Baccharis dracunculifolia DC.	Baccharis	dracunculifolia DC.	Asteraceae	Brazil	leaf	EO	Streptococcus mitis	+	MIC	250	µg/mL	N	66	antimicrobial activity against oral biofilms												X
Baccharis dracunculifolia DC.	Baccharis	dracunculifolia DC.	Asteraceae	Brazil	leaf	EO	Streptococcus sanguinis	+	MIC	500	µg/mL	N	66	antimicrobial activity against oral biofilms												X
Baccharis dracunculifolia DC.	Baccharis	dracunculifolia DC.	Asteraceae	Brazil	aerial part	EO	Staphylococcus aureus	+	MIC	500	µg/mL	Y	87	NS	X
Baccharis dracunculifolia DC.	Baccharis	dracunculifolia DC.	Asteraceae	Brazil	leaf (bud)	CHex	Staphylococcus aureus	+	MIC	295.5	µg/mL	Y	455	NS	X
Baccharis salicina Torr. & A.Gray	Baccharis	salicina Torr. & A.Gray	Asteraceae	Argentina	NS	CE	Staphylococcus aureus (MRSA)	+	MIC	125	µg/mL	N	91	diarrhea, dysentery, antiseptic, vermifuge, skin diseases, gastritis			X		X	X
Baccharis salicina Torr. & A.Gray	Baccharis	salicina Torr. & A.Gray	Asteraceae	Argentina	NS	CE	Enterococcus faecalis	+	MIC	500	µg/mL	N	91	diarrhea, dysentery, antiseptic, vermifuge, skin diseases, gastritis			X		X	X
Baccharoides calvoana (Hook.f.) "Isawumi, El-Ghazaly & B.Nord."	Baccharoides	calvoana (Hook.f.) "Isawumi, El-Ghazaly & B.Nord."	Asteraceae	Cameroon	leaf	CM	Enterobacter aerogenes	-	MIC	128	µg/mL	N	340	wounds, anticancer, fever, stomach ache, diarrhea, hernia, spleen enlargement			X		X	X
Baccharoides calvoana (Hook.f.) "Isawumi, El-Ghazaly & B.Nord."	Baccharoides	calvoana (Hook.f.) "Isawumi, El-Ghazaly & B.Nord."	Asteraceae	Cameroon	leaf	CM	Escherichia coli	-	MIC	128	µg/mL	N	340	wounds, anticancer, fever, stomach ache, diarrhea, hernia, spleen enlargement			X		X	X
Baccharoides calvoana (Hook.f.) "Isawumi, El-Ghazaly & B.Nord."	Baccharoides	calvoana (Hook.f.) "Isawumi, El-Ghazaly & B.Nord."	Asteraceae	Cameroon	leaf	CM	Providencia stuartii	-	MIC	128	µg/mL	N	340	wounds, anticancer, fever, stomach ache, diarrhea, hernia, spleen enlargement			X		X	X
Baccharoides calvoana (Hook.f.) "Isawumi, El-Ghazaly & B.Nord."	Baccharoides	calvoana (Hook.f.) "Isawumi, El-Ghazaly & B.Nord."	Asteraceae	Cameroon	leaf	CM	Enterobacter cloacae	-	MIC	256	µg/mL	N	340	wounds, anticancer, fever, stomach ache, diarrhea, hernia, spleen enlargement			X		X	X
Baccharoides calvoana (Hook.f.) "Isawumi, El-Ghazaly & B.Nord."	Baccharoides	calvoana (Hook.f.) "Isawumi, El-Ghazaly & B.Nord."	Asteraceae	Cameroon	leaf	CM	Klebsiella pneumoniae	-	MIC	256	µg/mL	N	340	wounds, anticancer, fever, stomach ache, diarrhea, hernia, spleen enlargement			X		X	X
Backhousia citriodora F.Muell	Backhousia	citriodora F.Muell	Myrtaceae	NS	herb	EO	Staphylococcus aureus	+	MIC	50	µg/mL	N	440	NS	X
Backhousia citriodora F.Muell	Backhousia	citriodora F.Muell	Myrtaceae	NS	herb	EO	Escherichia coli	-	MIC	200	µg/mL	N	440	NS	X
Bacopa monnieri (L.) Wellst.	Bacopa	monnieri (L.) Wellst.	Plantaginaceae	Bangladesh	leaf	CE	Staphylococcus aureus	+	MIC	75	µg/mL	Y	151	gastrointestinal discomfort, rejuvenation, promoting memory and intellect, skin disorders, epilepsy, pyrexia and analgesia			X		X	X				X
Baeckea frutescens L.	Baeckea	frutescens L.	Myrtaceae	Vietnam	leaf	CM	Bacillus cereus	+	MIC	62.5	µg/mL	N	462	influenza, indigestion, sores,menstrual irregularities					X	X		X
Baeckea frutescens L.	Baeckea	frutescens L.	Myrtaceae	Vietnam	leaf	CM	Bacillus subtilis	+	MIC	62.5	µg/mL	N	462	influenza, indigestion, sores,menstrual irregularities					X	X		X
Baeckea frutescens L.	Baeckea	frutescens L.	Myrtaceae	Vietnam	leaf	CM	Staphylococcus aureus	+	MIC	62.5	µg/mL	N	462	influenza, indigestion, sores,menstrual irregularities					X	X		X
Baliospermum solanifolium (Burm.) Suresh	Baliospermum	solanifolium (Burm.) Suresh	Euphorbiaceae	India	bark	CM	Vibrio cholerae	-	MIC	70	µg/mL	N	358	NS	X
Baliospermum solanifolium (Burm.) Suresh	Baliospermum	solanifolium (Burm.) Suresh	Euphorbiaceae	India	bark	CM	Vibrio cholerae	-	MIC	120	µg/mL	N	358	NS	X
Baliospermum solanifolium (Burm.) Suresh	Baliospermum	solanifolium (Burm.) Suresh	Euphorbiaceae	India	leaf	CM	Vibrio cholerae	-	MIC	200	µg/mL	N	358	NS	X
Ballota acetabulosa (L.) Benth.	Ballota	acetabulosa (L.) Benth.	Lamiaceae	Turkey	aerial part	CPEt	Mycobacterium tuberculosis	+	MIC	200	µg/mL	N	43	wound treatment, diuretic, choleretic			X		X		X
Balsamocitrus camerunensis Letouzey	Balsamocitrus	camerunensis Letouzey	Rutaceae	Cameroon	stem bark	CDichl	Enterobacter aerogenes	-	MIC	256	µg/mL	N	167	diahrreal infections					X
Barleria argillicola Oberm.	Barleria	argillicola Oberm.	Acanthaceae	South Africa	aerial part	CM/Dichl	Staphylococcus aureus	+	MIC	312.5	µg/mL	N	32	neutraceutical						X
Barleria argillicola Oberm.	Barleria	argillicola Oberm.	Acanthaceae	South Africa	root	CM/Dichl	Staphylococcus aureus	+	MIC	312.6	µg/mL	N	32	neutraceutical						X
Barringtonia macrocarpa Hassk.	Barringtonia	macrocarpa Hassk.	Lecythidaceae	Indonesia	leaf	CE	Bacillus subtilis	+	MIC	250	µg/mL	N	3	NS	X
Barringtonia macrocarpa Hassk.	Barringtonia	macrocarpa Hassk.	Lecythidaceae	Indonesia	leaf	CE	Escherichia coli	-	MIC	250	µg/mL	N	3	NS	X
Basilicum polystachyon (L.) Moench.	Basilicum	polystachyon (L.) Moench.	Lamiaceae	Cameroon	leaf	CM	Enterobacter aerogenes	-	MIC	256	µg/mL	N	443	Infectious diseases, gastroenteritis					X	X
Basilicum polystachyon (L.) Moench.	Basilicum	polystachyon (L.) Moench.	Lamiaceae	Cameroon	leaf	CM	Providencia stuartii	-	MIC	256	µg/mL	N	443	Infectious diseases, gastroenteritis					X	X
Bauhinia fulva Korth.	Bauhinia	fulva Korth.	Fabaceae	Indonesia	leaf	CE	Bacillus subtilis	+	MIC	250	µg/mL	N	3	NS	X
Bauhinia fulva Korth.	Bauhinia	fulva Korth.	Fabaceae	Indonesia	leaf	CE	Escherichia coli	-	MIC	250	µg/mL	N	3	NS	X
Bauhinia kockiana Korth.	Bauhinia	kockiana Korth.	Fabaceae	Malaysia	flower	CE	Staphylococcus aureus (MRSA)	+	MIC	62.5	µg/mL	N	101	treating gonorrhoea, nervous debility, insomnia as well as fatigue, and toothache						X		X		X		X
Bauhinia kockiana Korth.	Bauhinia	kockiana Korth.	Fabaceae	Malaysia	flower	CM	Staphylococcus aureus (MRSA)	+	MIC	125	µg/mL	N	101	treating gonorrhoea, nervous debility, insomnia as well as fatigue, and toothache						X		X		X		X
Bauhinia macranthera Hemsl.	Bauhinia	macranthera Hemsl.	Fabaceae	South Africa	leaf	CDichl	Cutibacterium acnes	+	MIC	500	µg/mL	N	273	wound treatment			X
Bauhinia macranthera Hemsl.	Bauhinia	macranthera Hemsl.	Fabaceae	South Africa	leaf	CDichl	Pseudomonas aeruginosa	-	MIC	500	µg/mL	N	273	wound treatment			X
Bauhinia thonningii Schum.	Bauhinia	thonningii Schum.	Fabaceae	Kenya	stem bark	CM	Mycoplasma mycoides	-	MIC	230	µg/mL	N	220	Livestock respiratory diseases													X
Beilschmiedia acuta Kostermans	Beilschmiedia	acuta Kostermans	Lauraceae	Cameroon	bark	CE	Enterobacter aerogenes	-	MIC	16	µg/mL	N	429	bacterial infections, gastrointestinal infections					X	X
Beilschmiedia acuta Kostermans	Beilschmiedia	acuta Kostermans	Lauraceae	Cameroon	bark	CE	Escherichia coli	-	MIC	16	µg/mL	N	429	bacterial infections, gastrointestinal infections					X	X
Beilschmiedia acuta Kostermans	Beilschmiedia	acuta Kostermans	Lauraceae	Cameroon	bark	CE	Klebsiella pneumoniae	-	MIC	32	µg/mL	N	429	bacterial infections, gastrointestinal infections					X	X
Beilschmiedia acuta Kostermans	Beilschmiedia	acuta Kostermans	Lauraceae	Cameroon	bark	CE	Providencia stuartii	-	MIC	32	µg/mL	N	429	bacterial infections, gastrointestinal infections					X	X
Beilschmiedia acuta Kostermans	Beilschmiedia	acuta Kostermans	Lauraceae	Cameroon	bark	CE	Pseudomonas aeruginosa	-	MIC	32	µg/mL	N	429	bacterial infections, gastrointestinal infections					X	X
Beilschmiedia acuta Kostermans	Beilschmiedia	acuta Kostermans	Lauraceae	Cameroon	leaf	CE	Klebsiella pneumoniae	-	MIC	128	µg/mL	N	429	bacterial infections, gastrointestinal infections					X	X
Beilschmiedia acuta Kostermans	Beilschmiedia	acuta Kostermans	Lauraceae	Cameroon	flower	CE	Klebsiella pneumoniae	-	MIC	128	µg/mL	N	429	bacterial infections, gastrointestinal infections					X	X
Beilschmiedia acuta Kostermans	Beilschmiedia	acuta Kostermans	Lauraceae	Cameroon	flower	CE	Enterobacter aerogenes	-	MIC	256	µg/mL	N	429	bacterial infections, gastrointestinal infections					X	X
Beilschmiedia acuta Kostermans	Beilschmiedia	acuta Kostermans	Lauraceae	Cameroon	bark	CE	Enterobacter cloacae	-	MIC	256	µg/mL	N	429	bacterial infections, gastrointestinal infections					X	X
Beilschmiedia acuta Kostermans	Beilschmiedia	acuta Kostermans	Lauraceae	Cameroon	leaf	CE	Escherichia coli	-	MIC	256	µg/mL	N	429	bacterial infections, gastrointestinal infections					X	X
Beilschmiedia acuta Kostermans	Beilschmiedia	acuta Kostermans	Lauraceae	Cameroon	flower	CE	Escherichia coli	-	MIC	256	µg/mL	N	429	bacterial infections, gastrointestinal infections					X	X
Beilschmiedia acuta Kostermans	Beilschmiedia	acuta Kostermans	Lauraceae	Cameroon	leaf	CE	Providencia stuartii	-	MIC	256	µg/mL	N	429	bacterial infections, gastrointestinal infections					X	X
Beilschmiedia acuta Kostermans	Beilschmiedia	acuta Kostermans	Lauraceae	Cameroon	flower	CE	Providencia stuartii	-	MIC	256	µg/mL	N	429	bacterial infections, gastrointestinal infections					X	X
Berberis aristata DC.	Berberis	aristata DC.	Berberidaceae	India	stem bark	CE	Escherichia coli (Carbapenem-R)	-	MIC	25	µg/mL	Y	438	ulcers, rheumatism, eye disorders					X				X		X
Berberis microphylla G. Forst.	Berberis	microphylla G. Forst.	Berberidaceae	Chile	root	CM	Staphylococcus aureus	+	MIC	83	µg/mL	N	285	treating fever, inflammation, stomachache, diarrhea, urinary tract infection, throat infection, gingivitis, liver problems					X	X	X					X	X
Berberis microphylla G. Forst.	Berberis	microphylla G. Forst.	Berberidaceae	Chile	stem	CM	Staphylococcus epidermidis	+	MIC	83	µg/mL	N	285	treating fever, inflammation, stomachache, diarrhea, urinary tract infection, throat infection, gingivitis, liver problems					X	X	X					X	X
Berberis microphylla G. Forst.	Berberis	microphylla G. Forst.	Berberidaceae	Chile	root	CM	Staphylococcus epidermidis	+	MIC	83	µg/mL	N	285	treating fever, inflammation, stomachache, diarrhea, urinary tract infection, throat infection, gingivitis, liver problems					X	X	X					X	X
Berberis microphylla G. Forst.	Berberis	microphylla G. Forst.	Berberidaceae	Chile	stem	CM	Bacillus cereus	+	MIC	125	µg/mL	N	285	treating fever, inflammation, stomachache, diarrhea, urinary tract infection, throat infection, gingivitis, liver problems					X	X	X					X	X
Berberis microphylla G. Forst.	Berberis	microphylla G. Forst.	Berberidaceae	Chile	root	CM	Bacillus cereus	+	MIC	125	µg/mL	N	285	treating fever, inflammation, stomachache, diarrhea, urinary tract infection, throat infection, gingivitis, liver problems					X	X	X					X	X
Berberis microphylla G. Forst.	Berberis	microphylla G. Forst.	Berberidaceae	Chile	leaf	CM	Staphylococcus epidermidis	+	MIC	125	µg/mL	N	285	treating fever, inflammation, stomachache, diarrhea, urinary tract infection, throat infection, gingivitis, liver problems					X	X	X					X	X
Berberis microphylla G. Forst.	Berberis	microphylla G. Forst.	Berberidaceae	Chile	root	CM	Bacillus subtilis	+	MIC	167	µg/mL	N	285	treating fever, inflammation, stomachache, diarrhea, urinary tract infection, throat infection, gingivitis, liver problems					X	X	X					X	X
Berberis microphylla G. Forst.	Berberis	microphylla G. Forst.	Berberidaceae	Chile	stem	CM	Staphylococcus aureus	+	MIC	167	µg/mL	N	285	treating fever, inflammation, stomachache, diarrhea, urinary tract infection, throat infection, gingivitis, liver problems					X	X	X					X	X
Berberis microphylla G. Forst.	Berberis	microphylla G. Forst.	Berberidaceae	Chile	stem	CM	Bacillus subtilis	+	MIC	250	µg/mL	N	285	treating fever, inflammation, stomachache, diarrhea, urinary tract infection, throat infection, gingivitis, liver problems					X	X	X					X	X
Berberis microphylla G. Forst.	Berberis	microphylla G. Forst.	Berberidaceae	Chile	leaf	CM	Staphylococcus aureus	+	MIC	250	µg/mL	N	285	treating fever, inflammation, stomachache, diarrhea, urinary tract infection, throat infection, gingivitis, liver problems					X	X	X					X	X
Berberis microphylla G. Forst.	Berberis	microphylla G. Forst.	Berberidaceae	Chile	leaf	CM	Bacillus cereus	+	MIC	333	µg/mL	N	285	treating fever, inflammation, stomachache, diarrhea, urinary tract infection, throat infection, gingivitis, liver problems					X	X	X					X	X
Berberis microphylla G. Forst.	Berberis	microphylla G. Forst.	Berberidaceae	Chile	leaf	CM	Bacillus subtilis	+	MIC	333	µg/mL	N	285	treating fever, inflammation, stomachache, diarrhea, urinary tract infection, throat infection, gingivitis, liver problems					X	X	X					X	X
Berberis vulgaris L.	Berberis	vulgaris L.	Berberidaceae	Canada	root	CE	Streptococcus pyogenes	+	MIC	250	µg/mL	Y	466	NS	X
Bidens pilosa L.	Bidens	pilosa L.	Asteraceae	South Africa	leaf	CM/Dichl	Neisseria gonorrhoeae	-	MIC	250	µg/mL	N	323	syphilis treatment								X
Bidens pilosa L.	Bidens	pilosa L.	Asteraceae	South Africa	leaf	CA	Ureaplasma urealyticum	-	MIC	250	µg/mL	N	323	syphilis treatment								X
Bidens pilosa L.	Bidens	pilosa L.	Asteraceae	South Africa	leaf	CM/Dichl	Ureaplasma urealyticum	-	MIC	500	µg/mL	N	323	syphilis treatment								X
Bletilla striata (Thunb.) Rchb.f.	Bletilla	striata (Thunb.) Rchb.f.	Orchidaceae	China	rhizome	Fr.	Staphylococcus aureus	+	MIC	8	µg/mL	N	192	abscesses, burns, infectious diseases			X			X
Bletilla striata (Thunb.) Rchb.f.	Bletilla	striata (Thunb.) Rchb.f.	Orchidaceae	China	rhizome	Fr.	Bacillus subtilis	+	MIC	32	µg/mL	N	192	abscesses, burns, infectious diseases			X			X
Blumea balsamifera (L.) DC.	Blumea	balsamifera (L.) DC.	Asteraceae	China	whole plant	CE	Staphylococcus aureus (MRSA)	+	MIC	64	µg/mL	N	480	anti-rheumatic, ringworm, sores, dysentery, detoxification, snake bite			X		X	X			X
Blumea balsamifera (L.) DC.	Blumea	balsamifera (L.) DC.	Asteraceae	China	whole plant	CE	Staphylococcus aureus (MRSA)	+	MIC	256	µg/mL	N	480	anti-rheumatic, ringworm, sores, dysentery, detoxification, snake bite			X		X	X			X
Boesenbergia rotunda (L.) Mansf.	Boesenbergia	rotunda (L.) Mansf.	Zingiberaceae	Thailand	rhizome	NS	Streptococcus pyogenes	+	MIC	7.81	µg/mL	N	264	NS	X
Boesenbergia rotunda (L.) Mansf.	Boesenbergia	rotunda (L.) Mansf.	Zingiberaceae	Indonesia	rhizome	CE	Streptococcus mutans	+	MIC	64	µg/mL	Y	423	NS	X
Boesenbergia rotunda (L.) Mansf.	Boesenbergia	rotunda (L.) Mansf.	Zingiberaceae	Indonesia	rhizome	CE	Staphylococcus aureus	+	MIC	128	µg/mL	Y	423	NS	X
Boesenbergia rotunda (L.) Mansf.	Boesenbergia	rotunda (L.) Mansf.	Zingiberaceae	Indonesia	rhizome	CE	Staphylococcus aureus (MSSA)	+	MIC	128	µg/mL	Y	423	swelling, wounds, dental caries, dermatitis, dry cough and cold, tooth and gum disease, diarrhea, dysentary, diuretic			X		X		X					X	X
Boesenbergia rotunda (L.) Mansf.	Boesenbergia	rotunda (L.) Mansf.	Zingiberaceae	Thailand	rhizome	CE	Staphylococcus aureus	+	MIC	16	µg/mL	N	433	NS	X
Boesenbergia rotunda (L.) Mansf.	Boesenbergia	rotunda (L.) Mansf.	Zingiberaceae	Thailand	rhizome	CE	Staphylococcus epidermidis	+	MIC	16	µg/mL	N	433	NS	X
Boophone disticha L.f.	Boophone	disticha L.f.	Amaryllidaceae	South Africa	leaf	CDichl	Cutibacterium acnes	+	MIC	500	µg/mL	N	273	treatment of septic wounds, boils, and external sores			X			X
Boophone disticha L.f.	Boophone	disticha L.f.	Amaryllidaceae	South Africa	leaf	CDichl	Staphylococcus epidermidis	+	MIC	500	µg/mL	N	273	treatment of septic wounds, boils, and external sores			X			X
Boscia albitrunca (Burch.) Gilg & Benedict	Boscia	albitrunca (Burch.) Gilg & Benedict	Capparaceae	Namibia	bark, root, leaf	CE	Escherichia coli	-	MIC	125	µg/mL	N	205	NS	X
Boscia albitrunca (Burch.) Gilg & Benedict	Boscia	albitrunca (Burch.) Gilg & Benedict	Capparaceae	Namibia	bark, root, leaf	CE	Staphylococcus aureus	+	MIC	125	µg/mL	N	205	NS	X
Boscia albitrunca (Burch.) Gilg & Benedict	Boscia	albitrunca (Burch.) Gilg & Benedict	Capparaceae	Nigeria	leaf	CBuOH	Bacillus subtilis	+	MIC	390	µg/mL	N	336	eye related ailments and haemorrhoid diseases					X						X
Boswellia papyrifera (Del.) Hochst	Boswellia	papyrifera (Del.) Hochst	Burseraceae	Sudan	resin	EO	Escherichia coli	-	MIC	16	µg/mL	N	468	cough and respiratory infections													X
Boswellia papyrifera (Del.) Hochst	Boswellia	papyrifera (Del.) Hochst	Burseraceae	Sudan	resin	EO	Staphylococcus aureus	+	MIC	32	µg/mL	N	468	cough and respiratory infections													X
Boswellia papyrifera (Del.) Hochst	Boswellia	papyrifera (Del.) Hochst	Burseraceae	Sudan	resin	EO	Bacillus subtilis	+	MIC	250	µg/mL	N	468	cough and respiratory infections													X
Brachylaena discolor DC.	Brachylaena	discolor DC.	Asteraceae	South Africa	twig	CDichl/M	Brevibacterium agri	+	MIC	190	µg/mL	N	327	NS	X
Brachylaena discolor DC.	Brachylaena	discolor DC.	Asteraceae	South Africa	twig	CA	Staphylococcus aureus (MRSA)	+	MIC	250	µg/mL	N	327	NS	X
Brachylaena discolor DC.	Brachylaena	discolor DC.	Asteraceae	South Africa	twig	CA	Pseudomonas aeruginosa	-	MIC	500	µg/mL	N	327	NS	X
Brachylaena transvaalensis Hutch. ex E.Phillips & Schweick.	Brachylaena	transvaalensis Hutch. ex E.Phillips & Schweick.	Asteraceae	South Africa	leaf	CA	Bacillus cereus	+	MIC	250	µg/mL	N	452	diarrhea					X
Brachylaena transvaalensis Hutch. ex E.Phillips & Schweick.	Brachylaena	transvaalensis Hutch. ex E.Phillips & Schweick.	Asteraceae	South Africa	leaf	CA	Shigella flexneri	-	MIC	500	µg/mL	N	452	diarrhea					X
Brandisia hancei Hook.f.	Brandisia	hancei Hook.f.	Paulowniaceae	China	whole plant	CE	Staphylococcus aureus (MRSA)	+	MIC	32	µg/mL	N	480	jaundice, boils, swelling, tuberculosis injury hematemesis, osteomyelitis, periostitis, rheumatism and pain			X		X				X				X
Brandisia hancei Hook.f.	Brandisia	hancei Hook.f.	Paulowniaceae	China	whole plant	CE	Staphylococcus aureus (MRSA)	+	MIC	64	µg/mL	N	480	jaundice, boils, swelling, tuberculosis injury hematemesis, osteomyelitis, periostitis, rheumatism and pain			X		X	X			X				X
Brassica rapa L.	Brassica	rapa L.	Brassicaceae	India	seed	CM	Pseudomonas aeruginosa	-	MIC	250	µg/mL	N	49	exacerbations, cancer and tumors						X				X
Brassica rapa L.	Brassica	rapa L.	Brassicaceae	India	seed	CA	Pseudomonas aeruginosa	-	MIC	250	µg/mL	N	49	exacerbations, cancer and tumors						X				X
Brassica rapa L.	Brassica	rapa L.	Brassicaceae	India	seed	CM	Staphylococcus aureus	+	MIC	250	µg/mL	N	49	exacerbations, cancer and tumors						X				X
Bridelia cathartica Bertol.	Bridelia	cathartica Bertol.	Phyllanthaceae	Mozambique	root	CDichl	Enterococcus faecalis	+	MIC	7.5	µg/mL	N	278	diarrhea, gonorrhea, fever					X		X
Bridelia cathartica Bertol.	Bridelia	cathartica Bertol.	Phyllanthaceae	Mozambique	root	CM	Enterococcus faecalis	+	MIC	7.5	µg/mL	N	278	diarrhea, gonorrhea, fever					X		X
Bridelia cathartica Bertol.	Bridelia	cathartica Bertol.	Phyllanthaceae	Mozambique	root	CM	Staphylococcus aureus	+	MIC	7.5	µg/mL	N	278	diarrhea, gonorrhea, fever					X		X
Bridelia cathartica Bertol.	Bridelia	cathartica Bertol.	Phyllanthaceae	Mozambique	root	CM	Micrococcus luteus	+	MIC	15	µg/mL	N	278	diarrhea, gonorrhea, fever					X		X
Bridelia cathartica Bertol.	Bridelia	cathartica Bertol.	Phyllanthaceae	Mozambique	root	CHex	Micrococcus luteus	+	MIC	125	µg/mL	N	278	diarrhea, gonorrhea, fever					X		X
Bridelia cathartica Bertol.	Bridelia	cathartica Bertol.	Phyllanthaceae	Mozambique	root	CEtOAc	Micrococcus luteus	+	MIC	125	µg/mL	N	278	diarrhea, gonorrhea, fever					X		X
Bridelia cathartica Bertol.	Bridelia	cathartica Bertol.	Phyllanthaceae	Mozambique	root	CM	Pseudomonas aeruginosa	-	MIC	125	µg/mL	N	278	diarrhea, gonorrhea, fever					X		X
Bridelia cathartica Bertol.	Bridelia	cathartica Bertol.	Phyllanthaceae	Mozambique	root	CHex	Staphylococcus aureus	+	MIC	125	µg/mL	N	278	diarrhea, gonorrhea, fever					X		X
Bridelia cathartica Bertol.	Bridelia	cathartica Bertol.	Phyllanthaceae	Mozambique	root	CDichl	Staphylococcus aureus	+	MIC	125	µg/mL	N	278	diarrhea, gonorrhea, fever					X		X
Bridelia cathartica Bertol.	Bridelia	cathartica Bertol.	Phyllanthaceae	Mozambique	root	CEtOAc	Enterococcus faecalis	+	MIC	250	µg/mL	N	278	diarrhea, gonorrhea, fever					X		X
Bridelia cathartica Bertol.	Bridelia	cathartica Bertol.	Phyllanthaceae	Mozambique	root	CHex	Klebsiella pneumoniae	-	MIC	250	µg/mL	N	278	diarrhea, gonorrhea, fever					X		X
Bridelia cathartica Bertol.	Bridelia	cathartica Bertol.	Phyllanthaceae	Mozambique	root	CDichl	Klebsiella pneumoniae	-	MIC	250	µg/mL	N	278	diarrhea, gonorrhea, fever					X		X
Bridelia cathartica Bertol.	Bridelia	cathartica Bertol.	Phyllanthaceae	Mozambique	root	CEtOAc	Klebsiella pneumoniae	-	MIC	250	µg/mL	N	278	diarrhea, gonorrhea, fever					X		X
Bridelia cathartica Bertol.	Bridelia	cathartica Bertol.	Phyllanthaceae	Mozambique	root	CM	Klebsiella pneumoniae	-	MIC	250	µg/mL	N	278	diarrhea, gonorrhea, fever					X		X
Bridelia cathartica Bertol.	Bridelia	cathartica Bertol.	Phyllanthaceae	Mozambique	root	CEtOAc	Staphylococcus aureus	+	MIC	250	µg/mL	N	278	diarrhea, gonorrhea, fever					X		X
Bridelia cathartica Bertol.	Bridelia	cathartica Bertol.	Phyllanthaceae	South Africa	leaf	CM/Chl (1:1)	Moraxella catarrhalis	-	MIC	500	µg/mL	N	470	Respiratory infections													X
Bridelia ferruginea Benth.	Bridelia	ferruginea Benth.	Phyllanthaceae	Ghana	stem bark	CHex	Mycobacterium ulcerans	+	MIC	250	µg/mL	N	444	Buruli ulcer, wound			X
Bridelia micrantha (Hochst.) Baill.	Bridelia	micrantha (Hochst.) Baill.	Euphorbiaceae	South Africa	bark	CA	Cutibacterium acnes	+	MIC	250	µg/mL	N	273	burn and wound treatment			X
Bridelia micrantha (Hochst.) Baill.	Bridelia	micrantha (Hochst.) Baill.	Euphorbiaceae	South Africa	leaf	CA	Brevibacterium agri	+	MIC	500	µg/mL	N	273	burn and wound treatment			X
Bromus inermis Leyss.	Bromus	inermis Leyss.	Poaceae	Iran (Isfahan)	Inflorescence	CHex	Staphylococcus aureus	+	MIC	60	µg/mL	N	25	antimicrobial						X
Bromus inermis Leyss.	Bromus	inermis Leyss.	Poaceae	Iran (Isfahan)	Inflorescence	CHex	Staphylococcus aureus (MRSA)	+	MIC	125	µg/mL	N	25	antimicrobial						X
Bromus inermis Leyss.	Bromus	inermis Leyss.	Poaceae	Iran (Isfahan)	Inflorescence	CHex	Enterococcus faecium (VRE)	+	MIC	500	µg/mL	N	25	antimicrobial						X
Bryophyllum fedtschenkoi (Raym.-Hamet & H.Perrier) Lauz.-March.	Bryophyllum	fedtschenkoi (Raym.-Hamet & H.Perrier) Lauz.-March.	Crassulaceae	Brazil	whole plant	CE	Acinetobacter baumannii	-	MIC	128	µg/mL	N	376	traditional medicine in the tropics, analgesic										X
Bryophyllum fedtschenkoi (Raym.-Hamet & H.Perrier) Lauz.-March.	Bryophyllum	fedtschenkoi (Raym.-Hamet & H.Perrier) Lauz.-March.	Crassulaceae	Brazil	whole plant	CE	Pseudomonas aeruginosa	-	MIC	128	µg/mL	N	376	traditional medicine in the tropics, analgesic										X
Bryophyllum fedtschenkoi (Raym.-Hamet & H.Perrier) Lauz.-March.	Bryophyllum	fedtschenkoi (Raym.-Hamet & H.Perrier) Lauz.-March.	Crassulaceae	Brazil	whole plant	CE	Staphylococcus aureus	+	MIC	256	µg/mL	N	376	traditional medicine in the tropics, analgesic										X
Buchanania arborescens (Blume) Blume	Buchanania	arborescens (Blume) Blume	Anacardiaceae	Indonesia	leaf	CE	Bacillus subtilis	+	MIC	250	µg/mL	N	3	NS	X
Buchanania cochinchinensis (Lour.) M.R.Almeida	Buchanania	cochinchinensis (Lour.) M.R.Almeida	Anacardiaceae	India	bark	CM	Staphylococcus aureus	+	MIC	187	µg/mL	N	358	NS	X
Buchanania cochinchinensis (Lour.) M.R.Almeida	Buchanania	cochinchinensis (Lour.) M.R.Almeida	Anacardiaceae	India	bark	CM	Bacillus cereus	+	MIC	312	µg/mL	N	358	NS	X
Bulbine narcissifolia Salm-Dyck	Bulbine	narcissifolia Salm-Dyck	Xanthorrhoeaceae	Lesotho	Root	CA	Neisseria gonorrhoeae	-	MIC	30	µg/mL	N	399	STIs								X
Bulbine narcissifolia Salm-Dyck	Bulbine	narcissifolia Salm-Dyck	Xanthorrhoeaceae	Lesotho	Root	CDichl/M (1:1)	Neisseria gonorrhoeae	-	MIC	40	µg/mL	N	399	STIs								X
Caesalpinia crista L.	Caesalpinia	crista L.	Fabaceae	Bangladesh	leaf	CM	Staphylococcus aureus	+	MIC	159.5	µg/mL	N	8	antipyretic, gynecological disorders, skin infections, constipation, rheumatism			X		X	X		X	X
Caesalpinia crista L.	Caesalpinia	crista L.	Fabaceae	Bangladesh	leaf	CM	Escherichia coli	-	MIC	192.2	µg/mL	N	8	antipyretic, gynecological disorders, skin infections, constipation, rheumatism			X		X	X		X	X
Caesalpinia crista L.	Caesalpinia	crista L.	Fabaceae	Bangladesh	leaf	CM	Bacillus cereus	+	MIC	247	µg/mL	N	8	antipyretic, gynecological disorders, skin infections, constipation, rheumatism			X		X	X		X	X
Caesalpinia crista L.	Caesalpinia	crista L.	Fabaceae	Bangladesh	leaf	CM	Bacillus subtilis	+	MIC	300.7	µg/mL	N	8	antipyretic, gynecological disorders, skin infections, constipation, rheumatism			X		X	X		X	X
Caesalpinia crista L.	Caesalpinia	crista L.	Fabaceae	Bangladesh	leaf	CM	Pseudomonas aeruginosa	-	MIC	301.3	µg/mL	N	8	antipyretic, gynecological disorders, skin infections, constipation, rheumatism			X		X	X		X	X
Caesalpinia crista L.	Caesalpinia	crista L.	Fabaceae	Bangladesh	leaf	CM	Bacillus megaterium	+	MIC	319	µg/mL	N	8	antipyretic, gynecological disorders, skin infections, constipation, rheumatism			X		X	X		X	X
Caesalpinia crista L.	Caesalpinia	crista L.	Fabaceae	Bangladesh	leaf	CM	Micrococcus sp.	+	MIC	443	µg/mL	N	8	antipyretic, gynecological disorders, skin infections, constipation, rheumatism			X		X	X		X	X
Caesalpinia crista L.	Caesalpinia	crista L.	Fabaceae	India	seed	CM	Staphylococcus aureus	+	MIC	64	µg/mL	N	241	antimalarial, anthelmintic, antipyretic, anti-inflammatory						X
Caesalpinia crista L.	Caesalpinia	crista L.	Fabaceae	India	seed	Fr.	Staphylococcus aureus	+	MIC	64	µg/mL	N	241	antimalarial, anthelmintic, antipyretic, anti-inflammatory						X
Caesalpinia crista L.	Caesalpinia	crista L.	Fabaceae	India	seed	Fr.	Staphylococcus aureus (MRSA)	+	MIC	64	µg/mL	N	241	antimicrobial, anthelmintic, antipyretic, anti-inflammatory, antimalarial agent						X
Caesalpinia crista L.	Caesalpinia	crista L.	Fabaceae	India	seed	Fr.	Staphylococcus aureus (MSSA)	+	MIC	64	µg/mL	N	241	antimicrobial, anthelmintic, antipyretic, anti-inflammatory, antimalarial agent						X
Caesalpinia crista L.	Caesalpinia	crista L.	Fabaceae	India	seed	CM	Acinetobacter baumannii	-	MIC	128	µg/mL	N	241	antimalarial, anthelmintic, antipyretic, anti-inflammatory						X
Caesalpinia crista L.	Caesalpinia	crista L.	Fabaceae	India	seed	Fr.	Pseudomonas aeruginosa	-	MIC	128	µg/mL	N	241	antimicrobial, anthelmintic, antipyretic, anti-inflammatory, antimalarial agent						X
Caesalpinia crista L.	Caesalpinia	crista L.	Fabaceae	India	seed	CM	Staphylococcus aureus (MRSA)	+	MIC	128	µg/mL	N	241	antimicrobial, anthelmintic, antipyretic, anti-inflammatory, antimalarial agent						X
Caesalpinia crista L.	Caesalpinia	crista L.	Fabaceae	India	seed	Fr.	Streptococcus pneumoniae	+	MIC	128	µg/mL	N	241	antimalarial, anthelmintic, antipyretic, anti-inflammatory						X
Caesalpinia crista L.	Caesalpinia	crista L.	Fabaceae	India	seed	Fr.	Streptococcus pyogenes	+	MIC	128	µg/mL	N	241	antimalarial, anthelmintic, antipyretic, anti-inflammatory						X
Caesalpinia crista L.	Caesalpinia	crista L.	Fabaceae	India	seed	Fr.	Streptoccocus sp.	+	MIC	128	µg/mL	N	241	antimalarial, anthelmintic, antipyretic, anti-inflammatory						X
Caesalpinia crista L.	Caesalpinia	crista L.	Fabaceae	India	seed	CM	Streptoccocus sp.	+	MIC	128	µg/mL	N	241	antimicrobial, anthelmintic, antipyretic, anti-inflammatory, antimalarial agent						X
Caesalpinia crista L.	Caesalpinia	crista L.	Fabaceae	India	seed	Fr.	Acinetobacter baumannii	-	MIC	256	µg/mL	N	241	antimicrobial, anthelmintic, antipyretic, anti-inflammatory, antimalarial agent						X
Caesalpinia crista L.	Caesalpinia	crista L.	Fabaceae	India	seed	CM	Escherichia coli	-	MIC	256	µg/mL	N	241	antimicrobial, anthelmintic, antipyretic, anti-inflammatory, antimalarial agent						X
Caesalpinia crista L.	Caesalpinia	crista L.	Fabaceae	India	seed	Fr.	Escherichia coli	-	MIC	256	µg/mL	N	241	antimicrobial, anthelmintic, antipyretic, anti-inflammatory, antimalarial agent						X
Caesalpinia crista L.	Caesalpinia	crista L.	Fabaceae	India	seed	CM	Pseudomonas aeruginosa	-	MIC	256	µg/mL	N	241	antimalarial, anthelmintic, antipyretic, anti-inflammatory						X
Caesalpinia crista L.	Caesalpinia	crista L.	Fabaceae	India	seed	CM	Streptococcus pneumoniae	+	MIC	256	µg/mL	N	241	antimicrobial, anthelmintic, antipyretic, anti-inflammatory, antimalarial agent						X
Caesalpinia sappan L.	Caesalpinia	sappan L.	Fabaceae	Thailand	heartwood	CE	Cutibacterium acnes	+	MIC	62.5	µg/mL	N	131	heartwood used as a coloring agent in food, beverages, cosmetics, and garments	X
Caesalpinia sappan L.	Caesalpinia	sappan L.	Fabaceae	Thailand	heartwood	CE	Cutibacterium acnes	+	MIC	62.5	µg/mL	N	334	NS	X
Caesalpinia sappan L.	Caesalpinia	sappan L.	Fabaceae	Thailand	heartwood	CE	Staphylococcus epidermidis	+	MIC	125	µg/mL	N	334	NS	X
Caesalpinia sappan L.	Caesalpinia	sappan L.	Fabaceae	Thailand	heartwood	CE	Staphylococcus aureus	+	MIC	250	µg/mL	N	334	NS	X
Caesalpinia sappan L.	Caesalpinia	sappan L.	Fabaceae	Thailand	heartwood	Fr.	Bacillus subtilis	+	MIC	62.5	µg/mL	N	335	emmenagogue, anti-inflammatory and hemostatic agent		X				X		X
Caesalpinia sappan L.	Caesalpinia	sappan L.	Fabaceae	Thailand	heartwood	Fr.	Staphylococcus epidermidis	+	MIC	62.5	µg/mL	N	335	emmenagogue, anti-inflammatory and hemostatic agent		X				X		X
Caesalpinia sappan L.	Caesalpinia	sappan L.	Fabaceae	Thailand	heartwood	CE	Bacillus subtilis	+	MIC	125	µg/mL	N	335	emmenagogue, anti-inflammatory and hemostatic agent		X				X		X
Caesalpinia sappan L.	Caesalpinia	sappan L.	Fabaceae	Thailand	heartwood	Fr.	Staphylococcus aureus	+	MIC	125	µg/mL	N	335	emmenagogue, anti-inflammatory and hemostatic agent		X				X		X
Caesalpinia sappan L.	Caesalpinia	sappan L.	Fabaceae	Thailand	heartwood	CE	Staphylococcus epidermidis	+	MIC	125	µg/mL	N	335	emmenagogue, anti-inflammatory and hemostatic agent		X				X		X
Caesalpinia sappan L.	Caesalpinia	sappan L.	Fabaceae	Thailand	heartwood	CE	Pseudomonas aeruginosa	-	MIC	250	µg/mL	N	335	emmenagogue, anti-inflammatory and hemostatic agent		X				X		X
Caesalpinia sappan L.	Caesalpinia	sappan L.	Fabaceae	Thailand	heartwood	Fr.	Pseudomonas aeruginosa	-	MIC	250	µg/mL	N	335	emmenagogue, anti-inflammatory and hemostatic agent		X				X		X
Caesalpinia sappan L.	Caesalpinia	sappan L.	Fabaceae	Thailand	heartwood	CE	Salmonella typhimurium	-	MIC	250	µg/mL	N	335	emmenagogue, anti-inflammatory and hemostatic agent		X				X		X
Caesalpinia sappan L.	Caesalpinia	sappan L.	Fabaceae	Thailand	heartwood	Fr.	Salmonella typhimurium	-	MIC	250	µg/mL	N	335	emmenagogue, anti-inflammatory and hemostatic agent		X				X		X
Caesalpinia sappan L.	Caesalpinia	sappan L.	Fabaceae	Thailand	heartwood	CE	Staphylococcus aureus	+	MIC	250	µg/mL	N	335	emmenagogue, anti-inflammatory and hemostatic agent		X				X		X
Caesalpinia sappan L.	Caesalpinia	sappan L.	Fabaceae	Thailand	heartwood	Fr.	Escherichia coli	-	MIC	500	µg/mL	N	335	emmenagogue, anti-inflammatory and hemostatic agent		X				X		X
Callicarpa tomentosa (L.) L.	Callicarpa	tomentosa (L.) L.	Lamiaceae	Malaysia	bark	Fr.	Staphylococcus aureus (MRSA)	+	MIC	64	µg/mL	N	104	treatments of abdominal troubles, fever, syphilis and diarrhea			X			X					X		X
Callicarpa tomentosa (L.) L.	Callicarpa	tomentosa (L.) L.	Lamiaceae	Malaysia	bark	CM	Staphylococcus aureus (MRSA)	+	MIC	128	µg/mL	N	104	treatments of abdominal troubles, fever, syphilis and diarrhea			X			X					X		X
Callicarpa tomentosa (L.) L.	Callicarpa	tomentosa (L.) L.	Lamiaceae	Malaysia	bark	CM	Staphylococcus aureus (MSSA)	+	MIC	128	µg/mL	N	104	treatments of abdominal troubles, fever, syphilis and diarrhea			X			X					X		X
Callicarpa tomentosa (L.) L.	Callicarpa	tomentosa (L.) L.	Lamiaceae	Malaysia	bark	Fr.	Staphylococcus aureus (MSSA)	+	MIC	128	µg/mL	N	104	treatments of abdominal troubles, fever, syphilis and diarrhea			X			X					X		X
Callitris columellaris F.Muell.	Callitris	columellaris F.Muell.	Cupressaceae	Australia	leaf	CE	Campylobacter jejuni	-	MIC	256	µg/mL	N	243	NS	X
Calophyllum brasiliense Cambess.	Calophyllum	brasiliense Cambess.	Clusiaceae	Brazil	leaf	CE	Mycobacterium tuberculosis	+	MIC	62.5	µg/mL	N	367	NS	X					X
Calpurnia aurea (Aiton) Benth.	Calpurnia	aurea (Aiton) Benth.	Fabaceae	Ethiopia	root	CM	Mycobacterium bovis	+	MIC	12.5	µg/mL	N	175	lung TB treatment													X
Calpurnia aurea (Aiton) Benth.	Calpurnia	aurea (Aiton) Benth.	Fabaceae	Ethiopia	root	CM	Mycobacterium tuberculosis	+	MIC	25	µg/mL	N	175	lung TB treatment						X							X
Camellia oleifera Abel	Camellia	oleifera Abel	Theaceae	China	seed	Fr.	Escherichia coli	-	MIC	31.3	µg/mL	N	202	NS	X
Camellia oleifera Abel	Camellia	oleifera Abel	Theaceae	China	seed	Fr.	Staphylococcus aureus	+	MIC	31.3	µg/mL	N	202	NS	X
Camellia oleifera Abel	Camellia	oleifera Abel	Theaceae	China	seed	Fr.	Bacillus subtilis	+	MIC	62.5	µg/mL	N	202	NS	X
Camellia sinensis (L.) Kuntze	Camellia	sinensis (L.) Kuntze	Theaceae	Cameroon	leaf	CM	Klebsiella pneumoniae	-	MIC	64	µg/mL	Y	142	Digestive aid, blood purification, antipyretic, strengthening teeth and bones, boost immune system, enhancing heart function, anti-aging, food poisoning, antiviral, and lowering blood sugar levels		X		X	X	X			X			X
Camellia sinensis (L.) Kuntze	Camellia	sinensis (L.) Kuntze	Theaceae	Cameroon	leaf	CM	Enterobacter cloacae	-	MIC	256	µg/mL	Y	142	Digestive aid, blood purification, antipyretic, strengthening teeth and bones, boost immune system, enhancing heart function, anti-aging, food poisoning, antiviral, and lowering blood sugar levels		X		X	X	X			X			X
Camellia sinensis (L.) Kuntze	Camellia	sinensis (L.) Kuntze	Theaceae	Cameroon	leaf	CM	Escherichia coli	-	MIC	256	µg/mL	Y	142	Digestive aid, blood purification, antipyretic, strengthening teeth and bones, boost immune system, enhancing heart function, anti-aging, food poisoning, antiviral, and lowering blood sugar levels		X		X	X	X			X			X
Camellia sinensis (L.) Kuntze	Camellia	sinensis (L.) Kuntze	Theaceae	Pakistan	leaf	CA	Staphylococcus aureus	+	MIC	190	µg/mL	N	160	NS	X
Camellia sinensis (L.) Kuntze	Camellia	sinensis (L.) Kuntze	Theaceae	Pakistan	leaf	CM	Staphylococcus aureus	+	MIC	390	µg/mL	N	160	NS	X
Camellia sinensis (L.) Kuntze	Camellia	sinensis (L.) Kuntze	Theaceae	Thailand	leaf	CE	Shigella spp.	-	MIC	20	µg/mL	Y	365	NS	X
Camellia sinensis (L.) Kuntze	Camellia	sinensis (L.) Kuntze	Theaceae	Indonesia	leaf	CA	Staphylococcus aureus (MRSA)	+	MIC	400	µg/mL	N	483	NS	X
Camellia sinensis (L.) Kuntze	Camellia	sinensis (L.) Kuntze	Theaceae	China	leaf (non fermented)	CA/E	Porphyromonas gingivalis	-	MIC	200	µg/mL	N	475	reducing the risk of CVD and cancer, oral health benefits		X				X						X
Camellia sinensis (L.) Kuntze	Camellia	sinensis (L.) Kuntze	Theaceae	China	leaf (semi fermented)	CA/E	Porphyromonas gingivalis	-	MIC	200	µg/mL	N	475	reducing the risk of CVD and cancer, oral health benefits		X				X						X
Camellia sinensis (L.) Kuntze	Camellia	sinensis (L.) Kuntze	Theaceae	China	leaf (fermented)	CA/E	Porphyromonas gingivalis	-	MIC	500	µg/mL	N	475	reducing the risk of CVD and cancer, oral health benefits		X				X						X
Canarium luzonicum (Blume) A.Gray	Canarium	luzonicum (Blume) A.Gray	Burseraceae	NS	resin	EO	Staphylococcus aureus	+	MIC	400	µg/mL	N	440	NS	X
Canarium schweinfurtii Engl.	Canarium	schweinfurtii Engl.	Burseraceae	Cameroon	fruit	CM	Escherichia coli	-	MIC	64	µg/mL	N	141	NS	X
Canarium schweinfurtii Engl.	Canarium	schweinfurtii Engl.	Burseraceae	Cameroon	fruit	CM	Enterobacter aerogenes	-	MIC	128	µg/mL	N	141	NS	X
Canarium schweinfurtii Engl.	Canarium	schweinfurtii Engl.	Burseraceae	Cameroon	fruit	CM	Klebsiella pneumoniae	-	MIC	256	µg/mL	N	141	NS	X
Canarium schweinfurtii Engl.	Canarium	schweinfurtii Engl.	Burseraceae	Cameroon	fruit	CM	Providencia stuartii	-	MIC	256	µg/mL	N	141	NS	X
Canarium schweinfurtii Engl.	Canarium	schweinfurtii Engl.	Burseraceae	Cameroon	bark	CM	Providencia stuartii	-	MIC	256	µg/mL	N	401	NS	X
Canthium inerme (L.f.) Kuntze	Canthium	inerme (L.f.) Kuntze	Rubiaceae	South Africa	twig	CDichl/M	Brevibacterium agri	+	MIC	30	µg/mL	N	327	NS	X
Canthium inerme (L.f.) Kuntze	Canthium	inerme (L.f.) Kuntze	Rubiaceae	South Africa	twig	CDichl/M	Pseudomonas aeruginosa	-	MIC	250	µg/mL	N	327	NS	X
Canthium inerme (L.f.) Kuntze	Canthium	inerme (L.f.) Kuntze	Rubiaceae	South Africa	twig	CDichl/M	Brevibacterium linens	+	MIC	500	µg/mL	N	327	NS	X
Canthium spinosum (Klotzsch ex Eckl. & Zeyh.) Kuntze	Canthium	spinosum (Klotzsch ex Eckl. & Zeyh.) Kuntze	Rubiaceae	South Africa	leaf	CE	Staphylococcus aureus	+	MIC	390	µg/mL	N	346	diarrhea					X
Capparis decidua (Forssk.) Edgew.	Capparis	decidua (Forssk.) Edgew.	Capparaceae	Pakistan	stem bark	CM	Bacillus subtilis	+	MIC	128.9	µg/mL	N	191	NS	X
Capparis decidua (Forssk.) Edgew.	Capparis	decidua (Forssk.) Edgew.	Capparaceae	Pakistan	fruit	CM	Bacillus subtilis	+	MIC	134.2	µg/mL	N	191	NS	X
Capparis decidua (Forssk.) Edgew.	Capparis	decidua (Forssk.) Edgew.	Capparaceae	Pakistan	fruit	CE	Bacillus subtilis	+	MIC	156.7	µg/mL	N	191	NS	X
Capparis decidua (Forssk.) Edgew.	Capparis	decidua (Forssk.) Edgew.	Capparaceae	Pakistan	fruit	CM	Escherichia coli	-	MIC	158.3	µg/mL	N	191	NS	X
Capparis decidua (Forssk.) Edgew.	Capparis	decidua (Forssk.) Edgew.	Capparaceae	Pakistan	root	CM	Escherichia coli	-	MIC	163.7	µg/mL	N	191	NS	X
Capparis decidua (Forssk.) Edgew.	Capparis	decidua (Forssk.) Edgew.	Capparaceae	Pakistan	stem bark	CE	Bacillus subtilis	+	MIC	179.1	µg/mL	N	191	NS	X
Capparis decidua (Forssk.) Edgew.	Capparis	decidua (Forssk.) Edgew.	Capparaceae	Pakistan	root	CE	Escherichia coli	-	MIC	179.6	µg/mL	N	191	NS	X
Capparis decidua (Forssk.) Edgew.	Capparis	decidua (Forssk.) Edgew.	Capparaceae	Pakistan	root	CM	Staphylococcus aureus	+	MIC	182.3	µg/mL	N	191	NS	X
Capparis decidua (Forssk.) Edgew.	Capparis	decidua (Forssk.) Edgew.	Capparaceae	Pakistan	fruit	CE	Escherichia coli	-	MIC	188.9	µg/mL	N	191	NS	X
Capparis decidua (Forssk.) Edgew.	Capparis	decidua (Forssk.) Edgew.	Capparaceae	Pakistan	root	CE	Staphylococcus aureus	+	MIC	189.3	µg/mL	N	191	NS	X
Capparis decidua (Forssk.) Edgew.	Capparis	decidua (Forssk.) Edgew.	Capparaceae	Pakistan	fruit	CM	Pasteurella multocida	-	MIC	191.9	µg/mL	N	191	NS	X
Capparis decidua (Forssk.) Edgew.	Capparis	decidua (Forssk.) Edgew.	Capparaceae	Pakistan	root	CM	Bacillus subtilis	+	MIC	197.7	µg/mL	N	191	NS	X
Capparis decidua (Forssk.) Edgew.	Capparis	decidua (Forssk.) Edgew.	Capparaceae	Pakistan	stem bark	CM	Pasteurella multocida	-	MIC	199	µg/mL	N	191	NS	X
Capparis decidua (Forssk.) Edgew.	Capparis	decidua (Forssk.) Edgew.	Capparaceae	Pakistan	root	CM	Pasteurella multocida	-	MIC	204.8	µg/mL	N	191	NS	X
Capparis decidua (Forssk.) Edgew.	Capparis	decidua (Forssk.) Edgew.	Capparaceae	Pakistan	stem bark	CM	Escherichia coli	-	MIC	212.3	µg/mL	N	191	NS	X
Capparis decidua (Forssk.) Edgew.	Capparis	decidua (Forssk.) Edgew.	Capparaceae	Pakistan	fruit	CAcet	Bacillus subtilis	+	MIC	212.8	µg/mL	N	191	NS	X
Capparis decidua (Forssk.) Edgew.	Capparis	decidua (Forssk.) Edgew.	Capparaceae	Pakistan	stem bark	CE	Pasteurella multocida	-	MIC	213.2	µg/mL	N	191	NS	X
Capparis decidua (Forssk.) Edgew.	Capparis	decidua (Forssk.) Edgew.	Capparaceae	Pakistan	root	CAcet	Escherichia coli	-	MIC	221.7	µg/mL	N	191	NS	X
Capparis decidua (Forssk.) Edgew.	Capparis	decidua (Forssk.) Edgew.	Capparaceae	Pakistan	fruit	CM	Staphylococcus aureus	+	MIC	231.1	µg/mL	N	191	NS	X
Capparis decidua (Forssk.) Edgew.	Capparis	decidua (Forssk.) Edgew.	Capparaceae	Pakistan	root	CE	Bacillus subtilis	+	MIC	232.3	µg/mL	N	191	NS	X
Capparis decidua (Forssk.) Edgew.	Capparis	decidua (Forssk.) Edgew.	Capparaceae	Pakistan	root	CE	Pasteurella multocida	-	MIC	232.7	µg/mL	N	191	NS	X
Capparis decidua (Forssk.) Edgew.	Capparis	decidua (Forssk.) Edgew.	Capparaceae	Pakistan	stem bark	CAcet	Bacillus subtilis	+	MIC	233.4	µg/mL	N	191	NS	X
Capparis decidua (Forssk.) Edgew.	Capparis	decidua (Forssk.) Edgew.	Capparaceae	Pakistan	fruit	CE	Pasteurella multocida	-	MIC	233.7	µg/mL	N	191	NS	X
Capparis decidua (Forssk.) Edgew.	Capparis	decidua (Forssk.) Edgew.	Capparaceae	Pakistan	stem bark	CM	Staphylococcus aureus	+	MIC	236.7	µg/mL	N	191	NS	X
Capparis decidua (Forssk.) Edgew.	Capparis	decidua (Forssk.) Edgew.	Capparaceae	Pakistan	stem bark	CE	Staphylococcus aureus	+	MIC	241.2	µg/mL	N	191	NS	X
Capparis decidua (Forssk.) Edgew.	Capparis	decidua (Forssk.) Edgew.	Capparaceae	Pakistan	fruit	CAcet	Escherichia coli	-	MIC	260.1	µg/mL	N	191	NS	X
Capparis decidua (Forssk.) Edgew.	Capparis	decidua (Forssk.) Edgew.	Capparaceae	Pakistan	root	CAcet	Staphylococcus aureus	+	MIC	263.4	µg/mL	N	191	NS	X
Capparis decidua (Forssk.) Edgew.	Capparis	decidua (Forssk.) Edgew.	Capparaceae	Pakistan	stem bark	CE	Escherichia coli	-	MIC	268.9	µg/mL	N	191	NS	X
Capparis decidua (Forssk.) Edgew.	Capparis	decidua (Forssk.) Edgew.	Capparaceae	Pakistan	fruit	CE	Staphylococcus aureus	+	MIC	269.9	µg/mL	N	191	NS	X
Capparis decidua (Forssk.) Edgew.	Capparis	decidua (Forssk.) Edgew.	Capparaceae	Pakistan	fruit	CAcet	Pasteurella multocida	-	MIC	285.7	µg/mL	N	191	NS	X
Capparis decidua (Forssk.) Edgew.	Capparis	decidua (Forssk.) Edgew.	Capparaceae	Pakistan	root	CAcet	Pasteurella multocida	-	MIC	286.4	µg/mL	N	191	NS	X
Capparis decidua (Forssk.) Edgew.	Capparis	decidua (Forssk.) Edgew.	Capparaceae	Pakistan	stem bark	CAcet	Pasteurella multocida	-	MIC	296.7	µg/mL	N	191	NS	X
Capparis decidua (Forssk.) Edgew.	Capparis	decidua (Forssk.) Edgew.	Capparaceae	Pakistan	stem bark	CAcet	Staphylococcus aureus	+	MIC	303.4	µg/mL	N	191	NS	X
Capparis decidua (Forssk.) Edgew.	Capparis	decidua (Forssk.) Edgew.	Capparaceae	Pakistan	stem bark	CAcet	Escherichia coli	-	MIC	310.1	µg/mL	N	191	NS	X
Capparis decidua (Forssk.) Edgew.	Capparis	decidua (Forssk.) Edgew.	Capparaceae	Pakistan	fruit	CAcet	Staphylococcus aureus	+	MIC	316.4	µg/mL	N	191	NS	X
Capparis decidua (Forssk.) Edgew.	Capparis	decidua (Forssk.) Edgew.	Capparaceae	Pakistan	root	CAcet	Bacillus subtilis	+	MIC	318.1	µg/mL	N	191	NS	X
Capparis spinosa L.	Capparis	spinosa L.	Capparaceae	Pakistan	fruit	CM	Staphylococcus aureus	+	MIC	110.9	µg/mL	Y	191	NS	X
Capparis spinosa L.	Capparis	spinosa L.	Capparaceae	Pakistan	fruit	CM	Pasteurella multocida	-	MIC	120.1	µg/mL	Y	191	NS	X
Capparis spinosa L.	Capparis	spinosa L.	Capparaceae	Pakistan	stem bark	CM	Bacillus subtilis	+	MIC	123.2	µg/mL	Y	191	NS	X
Capparis spinosa L.	Capparis	spinosa L.	Capparaceae	Pakistan	fruit	CE	Staphylococcus aureus	+	MIC	125.6	µg/mL	Y	191	NS	X
Capparis spinosa L.	Capparis	spinosa L.	Capparaceae	Pakistan	fruit	CM	Bacillus subtilis	+	MIC	126.7	µg/mL	Y	191	NS	X
Capparis spinosa L.	Capparis	spinosa L.	Capparaceae	Pakistan	stem bark	CM	Pasteurella multocida	-	MIC	126.7	µg/mL	Y	191	NS	X
Capparis spinosa L.	Capparis	spinosa L.	Capparaceae	Pakistan	root	CM	Escherichia coli	-	MIC	142.6	µg/mL	Y	191	NS	X
Capparis spinosa L.	Capparis	spinosa L.	Capparaceae	Pakistan	stem bark	CM	Staphylococcus aureus	+	MIC	145.2	µg/mL	Y	191	NS	X
Capparis spinosa L.	Capparis	spinosa L.	Capparaceae	Pakistan	root	CM	Staphylococcus aureus	+	MIC	156.7	µg/mL	Y	191	NS	X
Capparis spinosa L.	Capparis	spinosa L.	Capparaceae	Pakistan	root	CM	Bacillus subtilis	+	MIC	157.8	µg/mL	Y	191	NS	X
Capparis spinosa L.	Capparis	spinosa L.	Capparaceae	Pakistan	stem bark	CE	Pasteurella multocida	-	MIC	158.3	µg/mL	Y	191	NS	X
Capparis spinosa L.	Capparis	spinosa L.	Capparaceae	Pakistan	stem bark	CE	Bacillus subtilis	+	MIC	159.7	µg/mL	Y	191	NS	X
Capparis spinosa L.	Capparis	spinosa L.	Capparaceae	Pakistan	fruit	CE	Bacillus subtilis	+	MIC	160.1	µg/mL	Y	191	NS	X
Capparis spinosa L.	Capparis	spinosa L.	Capparaceae	Pakistan	fruit	CE	Pasteurella multocida	-	MIC	176.7	µg/mL	Y	191	NS	X
Capparis spinosa L.	Capparis	spinosa L.	Capparaceae	Pakistan	stem bark	CM	Escherichia coli	-	MIC	184.6	µg/mL	Y	191	NS	X
Capparis spinosa L.	Capparis	spinosa L.	Capparaceae	Pakistan	stem bark	CE	Staphylococcus aureus	+	MIC	189.1	µg/mL	Y	191	NS	X
Capparis spinosa L.	Capparis	spinosa L.	Capparaceae	Pakistan	root	CE	Escherichia coli	-	MIC	194.1	µg/mL	Y	191	NS	X
Capparis spinosa L.	Capparis	spinosa L.	Capparaceae	Pakistan	root	CE	Staphylococcus aureus	+	MIC	198.7	µg/mL	Y	191	NS	X
Capparis spinosa L.	Capparis	spinosa L.	Capparaceae	Pakistan	stem bark	CAcet	Bacillus subtilis	+	MIC	207.8	µg/mL	Y	191	NS	X
Capparis spinosa L.	Capparis	spinosa L.	Capparaceae	Pakistan	root	CM	Pasteurella multocida	-	MIC	207.9	µg/mL	Y	191	NS	X
Capparis spinosa L.	Capparis	spinosa L.	Capparaceae	Pakistan	root	CAcet	Escherichia coli	-	MIC	229.6	µg/mL	Y	191	NS	X
Capparis spinosa L.	Capparis	spinosa L.	Capparaceae	Pakistan	root	CE	Bacillus subtilis	+	MIC	231.4	µg/mL	Y	191	NS	X
Capparis spinosa L.	Capparis	spinosa L.	Capparaceae	Pakistan	root	CE	Pasteurella multocida	-	MIC	231.4	µg/mL	Y	191	NS	X
Capparis spinosa L.	Capparis	spinosa L.	Capparaceae	Pakistan	fruit	CAcet	Pasteurella multocida	-	MIC	234.9	µg/mL	Y	191	NS	X
Capparis spinosa L.	Capparis	spinosa L.	Capparaceae	Pakistan	stem bark	CE	Escherichia coli	-	MIC	236.2	µg/mL	Y	191	NS	X
Capparis spinosa L.	Capparis	spinosa L.	Capparaceae	Pakistan	stem bark	CAcet	Pasteurella multocida	-	MIC	246.7	µg/mL	Y	191	NS	X
Capparis spinosa L.	Capparis	spinosa L.	Capparaceae	Pakistan	fruit	CM	Escherichia coli	-	MIC	253.2	µg/mL	Y	191	NS	X
Capparis spinosa L.	Capparis	spinosa L.	Capparaceae	Pakistan	fruit	CAcet	Bacillus subtilis	+	MIC	253.9	µg/mL	Y	191	NS	X
Capparis spinosa L.	Capparis	spinosa L.	Capparaceae	Pakistan	stem bark	CAcet	Staphylococcus aureus	+	MIC	256.7	µg/mL	Y	191	NS	X
Capparis spinosa L.	Capparis	spinosa L.	Capparaceae	Pakistan	root	CAcet	Pasteurella multocida	-	MIC	264.8	µg/mL	Y	191	NS	X
Capparis spinosa L.	Capparis	spinosa L.	Capparaceae	Pakistan	fruit	CE	Escherichia coli	-	MIC	266.7	µg/mL	Y	191	NS	X
Capparis spinosa L.	Capparis	spinosa L.	Capparaceae	Pakistan	fruit	CAcet	Staphylococcus aureus	+	MIC	272.2	µg/mL	Y	191	NS	X
Capparis spinosa L.	Capparis	spinosa L.	Capparaceae	Pakistan	root	CAcet	Staphylococcus aureus	+	MIC	277.1	µg/mL	Y	191	NS	X
Capparis spinosa L.	Capparis	spinosa L.	Capparaceae	Pakistan	stem bark	CAcet	Escherichia coli	-	MIC	278.9	µg/mL	Y	191	NS	X
Capparis spinosa L.	Capparis	spinosa L.	Capparaceae	Pakistan	root	CAcet	Bacillus subtilis	+	MIC	282.6	µg/mL	Y	191	NS	X
Capparis spinosa L.	Capparis	spinosa L.	Capparaceae	Pakistan	fruit	CAcet	Escherichia coli	-	MIC	306.9	µg/mL	Y	191	NS	X
Capsicum annuum L.	Capsicum	annuum L.	Solanaceae	Ivory Coast	fruit	CM	Vibrio cholerae	-	MIC	200	µg/mL	Y	232	diarrhea, dysentery					X
Capsicum annuum L.	Capsicum	annuum L.	Solanaceae	Ivory Coast	fruit	CA	Vibrio cholerae	-	MIC	250	µg/mL	Y	232	diarrhea, dysentery					X
Capsicum annuum L.	Capsicum	annuum L.	Solanaceae	Ivory Coast	fruit	CA	Salmonella typhimurium	-	MIC	500	µg/mL	Y	232	diarrhea, dysentery					X
Capsicum annuum L.	Capsicum	annuum L.	Solanaceae	Ivory Coast	fruit	CM	Salmonella typhimurium	-	MIC	500	µg/mL	Y	232	diarrhea, dysentery					X
Capsicum annuum L.	Capsicum	annuum L.	Solanaceae	Ivory Coast	fruit	CA	Staphylococcus aureus	+	MIC	500	µg/mL	Y	232	diarrhea, dysentery					X
Capsicum annuum L.	Capsicum	annuum L.	Solanaceae	Ivory Coast	fruit	CM	Staphylococcus aureus	+	MIC	500	µg/mL	Y	232	diarrhea, dysentery					X
Capsicum annuum L.	Capsicum	annuum L.	Solanaceae	Cameroon	fruit	CM	Enterobacter aerogenes	-	MIC	256	µg/mL	N	340	wound, male virility, laxative, relieve muscle, joint, and toothache pain, to treat cough, asthma, and sore throat			X		X	X	X		X			X	X
Capsicum annuum L.	Capsicum	annuum L.	Solanaceae	Cameroon	fruit	CM	Klebsiella pneumoniae	-	MIC	256	µg/mL	N	340	wound, male virility, laxative, relieve muscle, joint, and toothache pain, to treat cough, asthma, and sore throat
Carica papaya L.	Carica	papaya L.	Caricaceae	Nigeria (Awka)	leaf	CE	Pseudomonas aeruginosa	-	MIC	6.25	µg/mL	N	45	analgesic, cardiotonic, digestive, emenagogue, vermifuge, amebicide, febrifuge, laxative, stomachic		X			X	X		X
Carica papaya L.	Carica	papaya L.	Caricaceae	Nigeria (Awka)	leaf	CE	Salmonella typhi	-	MIC	6.25	µg/mL	N	45	analgesic, cardiotonic, digestive, emenagogue, vermifuge, amebicide, febrifuge, laxative, stomachic		X			X	X		X
Carica papaya L.	Carica	papaya L.	Caricaceae	Nigeria (Awka)	leaf	CE	Staphylococcus aureus	+	MIC	6.25	µg/mL	N	45	analgesic, cardiotonic, digestive, emenagogue, vermifuge, amebicide, febrifuge, laxative, stomachic		X			X	X		X
Carica papaya L.	Carica	papaya L.	Caricaceae	Nigeria (Awka)	leaf	CE	Escherichia coli	-	MIC	12.5	µg/mL	N	45	analgesic, cardiotonic, digestive, emenagogue, vermifuge, amebicide, febrifuge, laxative, stomachic		X			X	X		X
Carica papaya L.	Carica	papaya L.	Caricaceae	Nigeria (Awka)	leaf	CE	Klebsiella pneumoniae	-	MIC	25	µg/mL	N	45	analgesic, cardiotonic, digestive, emenagogue, vermifuge, amebicide, febrifuge, laxative, stomachic		X			X	X		X
Carica papaya L.	Carica	papaya L.	Caricaceae	South Africa	leaf	CM/Dichl	Neisseria gonorrhoeae	-	MIC	250	µg/mL	N	323	treatment for gonnorhoeazeae, veneral disease, STIs, candida						X		X
Carica papaya L.	Carica	papaya L.	Caricaceae	South Africa	leaf	CA	Oligella ureolytica	-	MIC	380	µg/mL	N	323	treatment for gonnorhoeazeae, veneral disease, STIs, candida						X		X
Carica papaya L.	Carica	papaya L.	Caricaceae	South Africa	leaf	CA	Ureaplasma urealyticum	-	MIC	380	µg/mL	N	323	treatment for gonnorhoeazeae, veneral disease, STIs, candida						X		X
Carica papaya L.	Carica	papaya L.	Caricaceae	South Africa	leaf	CM/Dichl	Oligella ureolytica	-	MIC	500	µg/mL	N	323	treatment for gonnorhoeazeae, veneral disease, STIs, candida						X		X
Carica papaya L.	Carica	papaya L.	Caricaceae	South Africa	leaf	CM/Dichl	Ureaplasma urealyticum	-	MIC	500	µg/mL	N	323	treatment for gonnorhoeazeae, veneral disease, STIs, candida						X		X
Carica papaya L.	Carica	papaya L.	Caricaceae	Ghana	leaf	CE	Mycobacterium ulcerans	+	MIC	250	µg/mL	Y	444	Buruli ulcer, wound			X
Carica papaya L.	Carica	papaya L.	Caricaceae	Ghana	stem bark	CE	Mycobacterium ulcerans	+	MIC	250	µg/mL	Y	444	Buruli ulcer, wound			X
Caryocar brasiliense A.St.-Hil.	Caryocar	brasiliense A.St.-Hil.	Caryocaraceae	Brazil	leaf	CE	Escherichia coli	-	MIC	270	µg/mL	N	125	NS	X
Caryocar brasiliense A.St.-Hil.	Caryocar	brasiliense A.St.-Hil.	Caryocaraceae	Brazil	leaf	CE	Staphylococcus haemolyticus	+	MIC	270	µg/mL	N	375	NS	X
Caryocar brasiliense A.St.-Hil.	Caryocar	brasiliense A.St.-Hil.	Caryocaraceae	Brazil	leaf	CE	Staphylococcus haemolyticus	+	MIC	270	µg/mL	N	375	NS	X
Caryocar brasiliense A.St.-Hil.	Caryocar	brasiliense A.St.-Hil.	Caryocaraceae	Brazil	leaf	CE	Staphylococcus aureus	+	MIC	270	µg/mL	N	375	NS	X
Caryocar brasiliense A.St.-Hil.	Caryocar	brasiliense A.St.-Hil.	Caryocaraceae	Brazil	leaf	CE	Staphylococcus aureus	+	MIC	270	µg/mL	N	375	NS	X
Cassia abbreviata Oliv.	Cassia	abbreviata Oliv.	Fabaceae	Mozambique	stem bark	CM	Staphylococcus aureus	+	MIC	15	µg/mL	N	278	venereal disease, diarrhea					X					X
Cassia abbreviata Oliv.	Cassia	abbreviata Oliv.	Fabaceae	Mozambique	stem bark	CEtOAc	Micrococcus luteus	+	MIC	31	µg/mL	N	278	venereal disease, diarrhea					X					X
Cassia abbreviata Oliv.	Cassia	abbreviata Oliv.	Fabaceae	Mozambique	stem bark	CM	Micrococcus luteus	+	MIC	31	µg/mL	N	278	venereal disease, diarrhea					X					X
Cassia abbreviata Oliv.	Cassia	abbreviata Oliv.	Fabaceae	Mozambique	stem bark	CHex	Micrococcus luteus	+	MIC	62.5	µg/mL	N	278	venereal disease, diarrhea					X					X
Cassia abbreviata Oliv.	Cassia	abbreviata Oliv.	Fabaceae	Mozambique	stem bark	CDichl	Micrococcus luteus	+	MIC	62.5	µg/mL	N	278	venereal disease, diarrhea					X					X
Cassia abbreviata Oliv.	Cassia	abbreviata Oliv.	Fabaceae	Mozambique	stem bark	CM	Klebsiella pneumoniae	-	MIC	125	µg/mL	N	278	venereal disease, diarrhea					X					X
Cassia abbreviata Oliv.	Cassia	abbreviata Oliv.	Fabaceae	Mozambique	stem bark	CM	Pseudomonas aeruginosa	-	MIC	125	µg/mL	N	278	venereal disease, diarrhea					X					X
Cassia abbreviata Oliv.	Cassia	abbreviata Oliv.	Fabaceae	Mozambique	stem bark	CDichl	Enterococcus faecalis	+	MIC	250	µg/mL	N	278	venereal disease, diarrhea					X					X
Cassia abbreviata Oliv.	Cassia	abbreviata Oliv.	Fabaceae	Mozambique	stem bark	CEtOAc	Enterococcus faecalis	+	MIC	250	µg/mL	N	278	venereal disease, diarrhea					X					X
Cassia abbreviata Oliv.	Cassia	abbreviata Oliv.	Fabaceae	Mozambique	stem bark	CM	Enterococcus faecalis	+	MIC	250	µg/mL	N	278	venereal disease, diarrhea					X					X
Cassia abbreviata Oliv.	Cassia	abbreviata Oliv.	Fabaceae	Mozambique	stem bark	CHex	Klebsiella pneumoniae	-	MIC	250	µg/mL	N	278	venereal disease, diarrhea					X					X
Cassia abbreviata Oliv.	Cassia	abbreviata Oliv.	Fabaceae	Mozambique	stem bark	CDichl	Klebsiella pneumoniae	-	MIC	250	µg/mL	N	278	venereal disease, diarrhea					X					X
Cassia abbreviata Oliv.	Cassia	abbreviata Oliv.	Fabaceae	Mozambique	stem bark	CEtOAc	Klebsiella pneumoniae	-	MIC	250	µg/mL	N	278	venereal disease, diarrhea					X					X
Cassia abbreviata Oliv.	Cassia	abbreviata Oliv.	Fabaceae	South Africa	stem bark	CChl	Mycoplasma hominis	-	MIC	50	µg/mL	N	303	malaria and diabetes				X		X
Cassia abbreviata Oliv.	Cassia	abbreviata Oliv.	Fabaceae	South Africa	fruit	CEtOAc	Mycoplasma hominis	-	MIC	100	µg/mL	N	303	malaria and diabetes				X		X
Cassia abbreviata Oliv.	Cassia	abbreviata Oliv.	Fabaceae	South Africa	leaf	CA	Proteus mirabilis	-	MIC	100	µg/mL	N	303	malaria and diabetes				X		X
Cassia abbreviata Oliv.	Cassia	abbreviata Oliv.	Fabaceae	South Africa	stem bark	CM	Micrococcus luteus	+	MIC	200	µg/mL	N	303	malaria and diabetes				X		X
Cassia abbreviata Oliv.	Cassia	abbreviata Oliv.	Fabaceae	South Africa	fruit	CChl	Moraxella catarrhalis	-	MIC	200	µg/mL	N	303	malaria and diabetes				X		X
Cassia abbreviata Oliv.	Cassia	abbreviata Oliv.	Fabaceae	South Africa	leaf	CA	Moraxella catarrhalis	-	MIC	200	µg/mL	N	303	malaria and diabetes				X		X
Cassia abbreviata Oliv.	Cassia	abbreviata Oliv.	Fabaceae	South Africa	leaf	CAcet	Mycoplasma hominis	-	MIC	200	µg/mL	N	303	malaria and diabetes				X		X
Cassia abbreviata Oliv.	Cassia	abbreviata Oliv.	Fabaceae	South Africa	leaf	CM	Staphylococcus aureus	+	MIC	200	µg/mL	N	303	malaria and diabetes				X		X
Cassia abbreviata Oliv.	Cassia	abbreviata Oliv.	Fabaceae	South Africa	leaf	CAcet	Staphylococcus aureus	+	MIC	200	µg/mL	N	303	malaria and diabetes				X		X
Cassia abbreviata Oliv.	Cassia	abbreviata Oliv.	Fabaceae	South Africa	leaf	CA	Staphylococcus aureus	+	MIC	200	µg/mL	N	303	malaria and diabetes				X		X
Cassia abbreviata Oliv.	Cassia	abbreviata Oliv.	Fabaceae	South Africa	leaf	CM	Mycoplasma hominis	-	MIC	230	µg/mL	N	303	malaria and diabetes				X		X
Cassia abbreviata Oliv.	Cassia	abbreviata Oliv.	Fabaceae	South Africa	leaf	CA	Micrococcus luteus	+	MIC	260	µg/mL	N	303	malaria and diabetes				X		X
Cassia abbreviata Oliv.	Cassia	abbreviata Oliv.	Fabaceae	South Africa	stem bark	CEtOAc	Micrococcus luteus	+	MIC	330	µg/mL	N	303	malaria and diabetes				X		X
Cassia abbreviata Oliv.	Cassia	abbreviata Oliv.	Fabaceae	South Africa	fruit	CM	Micrococcus luteus	+	MIC	330	µg/mL	N	303	malaria and diabetes				X		X
Cassia abbreviata Oliv.	Cassia	abbreviata Oliv.	Fabaceae	South Africa	fruit	CM	Moraxella catarrhalis	-	MIC	330	µg/mL	N	303	malaria and diabetes				X		X
Cassia abbreviata Oliv.	Cassia	abbreviata Oliv.	Fabaceae	South Africa	fruit	CEtOAc	Proteus mirabilis	-	MIC	330	µg/mL	N	303	malaria and diabetes				X		X
Cassia abbreviata Oliv.	Cassia	abbreviata Oliv.	Fabaceae	South Africa	stem bark	CM	Staphylococcus aureus	+	MIC	330	µg/mL	N	303	malaria and diabetes				X		X
Cassia abbreviata Oliv.	Cassia	abbreviata Oliv.	Fabaceae	South Africa	fruit	CEtOAc	Staphylococcus aureus	+	MIC	330	µg/mL	N	303	malaria and diabetes				X		X
Cassia abbreviata Oliv.	Cassia	abbreviata Oliv.	Fabaceae	South Africa	leaf	CM	Micrococcus luteus	+	MIC	390	µg/mL	N	303	malaria and diabetes				X		X
Cassia abbreviata Oliv.	Cassia	abbreviata Oliv.	Fabaceae	South Africa	leaf	CEtOAc	Micrococcus luteus	+	MIC	390	µg/mL	N	303	malaria and diabetes				X		X
Cassia abbreviata Oliv.	Cassia	abbreviata Oliv.	Fabaceae	South Africa	stem bark	CEtOAc	Staphylococcus aureus	+	MIC	460	µg/mL	N	303	malaria and diabetes				X		X
Cassia fistula L.	Cassia	fistula L.	Fabaceae	India	leaf	CM	Staphylococcus aureus	+	MIC	94	µg/mL	Y	358	NS	X
Cassia fistula L.	Cassia	fistula L.	Fabaceae	India	leaf	CM	Bacillus cereus	+	MIC	312	µg/mL	Y	358	NS	X
Cassine glauca (Rottb.) Kuntze	Cassine	glauca (Rottb.) Kuntze	Celastraceae	India	leaf	CE	Corynebacterium sp.	+	MIC	250	µg/mL	N	302	cough, swellings, menstrual disorders													X
Cassine glauca (Rottb.) Kuntze	Cassine	glauca (Rottb.) Kuntze	Celastraceae	India	leaf	CE	Escherichia coli	-	MIC	250	µg/mL	N	302	cough, swellings, menstrual disorders							X	X
Cassine glauca (Rottb.) Kuntze	Cassine	glauca (Rottb.) Kuntze	Celastraceae	India	leaf	CE	Pseudomonas aeruginosa	-	MIC	250	µg/mL	N	302	cough, swellings, menstrual disorders							X	X
Cassinopsis ilicifolia (Hochst.) Sleumer	Cassinopsis	ilicifolia (Hochst.) Sleumer	Icacinaceae	South Africa	leaf	CE	Enterococcus faecalis	+	MIC	190	µg/mL	N	346	diarrhea and inflammation of ear					X								X
Cassinopsis ilicifolia (Hochst.) Sleumer	Cassinopsis	ilicifolia (Hochst.) Sleumer	Icacinaceae	South Africa	leaf	CE	Staphylococcus aureus	+	MIC	390	µg/mL	N	346	diarrhea and inflammation of ear					X								X
Cassytha glabella R. Br.	Cassytha	glabella R. Br.	Lauraceae	Australia (New South Wales)	whole plant	CE	Staphylococcus aureus (MRSA)	+	MIC	500	µg/mL	N	15	rheumatism, fever									X
Catharanthus roseus (L.) G.Don	Catharanthus	roseus (L.) G.Don	Apocynaceae	South Africa	root	CM/Dichl (1:1)	Shigella flexneri	-	MIC	410	µg/mL	Y	452	diarrhea					X
Catharanthus roseus (L.) G.Don	Catharanthus	roseus (L.) G.Don	Apocynaceae	Cameroon	leaf	CM	Escherichia coli	-	MIC	128	µg/mL	Y	459	NS	X
Catharanthus roseus (L.) G.Don	Catharanthus	roseus (L.) G.Don	Apocynaceae	Cameroon	leaf	CM	Staphylococcus aureus (MRSA)	+	MIC	128	µg/mL	Y	459	NS	X
Catharanthus roseus (L.) G.Don	Catharanthus	roseus (L.) G.Don	Apocynaceae	Cameroon	leaf	CM	Enterobacter aerogenes	-	MIC	256	µg/mL	Y	459	NS	X
Catharanthus roseus (L.) G.Don	Catharanthus	roseus (L.) G.Don	Apocynaceae	Cameroon	leaf	CM	Enterobacter cloacae	-	MIC	256	µg/mL	Y	459	NS	X
Catharanthus roseus (L.) G.Don	Catharanthus	roseus (L.) G.Don	Apocynaceae	Cameroon	stem	CM	Escherichia coli	-	MIC	256	µg/mL	Y	459	NS	X
Catharanthus roseus (L.) G.Don	Catharanthus	roseus (L.) G.Don	Apocynaceae	Cameroon	leaf	CM	Providencia stuartii	-	MIC	256	µg/mL	Y	459	NS	X
Catharanthus roseus (L.) G.Don	Catharanthus	roseus (L.) G.Don	Apocynaceae	Cameroon	stem	CM	Providencia stuartii	-	MIC	256	µg/mL	Y	459	NS	X
Catharanthus roseus (L.) G.Don	Catharanthus	roseus (L.) G.Don	Apocynaceae	Cameroon	stem	CM	Pseudomonas aeruginosa	-	MIC	256	µg/mL	Y	459	NS	X
Catunaregam spinosa Thunb	Catunaregam	spinosa Thunb	Rubiaceae	Zimbabwe	bark, leaf	CM	Staphylococcus aureus	+	MIC	260	µg/mL	N	329	skeletal disorders									X
Catunaregam spinosa Thunb	Catunaregam	spinosa Thunb	Rubiaceae	Zimbabwe	bark, leaf	CAcet	Pseudomonas aeruginosa	-	MIC	310	µg/mL	N	329	skeletal disorders									X
Catunaregam spinosa Thunb	Catunaregam	spinosa Thunb	Rubiaceae	Zimbabwe	bark, leaf	CAcet	Staphylococcus aureus	+	MIC	420	µg/mL	N	329	skeletal disorders									X
Celastrus paniculatus Willd.	Celastrus	paniculatus Willd.	Celastraceae	India	leaf	CM	Bacillus cereus	+	MIC	500	µg/mL	N	358	NS	X
Celastrus paniculatus Willd.	Celastrus	paniculatus Willd.	Celastraceae	India	leaf	CM	Vibrio cholerae	-	MIC	500	µg/mL	N	358	NS	X
Centaurea ragusina L.	Centaurea	ragusina L.	Asteraceae	Croatia	flower	EO	Bacillus cereus	+	MIC	16	µg/mL	N	368	Infectious diseases						X
Centaurea ragusina L.	Centaurea	ragusina L.	Asteraceae	Croatia	flower	EO	Cronobacter sakazakii	-	MIC	32	µg/mL	N	368	Infectious diseases						X
Centaurea ragusina L.	Centaurea	ragusina L.	Asteraceae	Croatia	flower	EO	Enterococcus faecalis	+	MIC	32	µg/mL	N	368	Infectious diseases						X
Centaurea ragusina L.	Centaurea	ragusina L.	Asteraceae	Croatia	flower	EO	Staphylococcus aureus	+	MIC	32	µg/mL	N	368	Infectious diseases						X
Centaurea ragusina L.	Centaurea	ragusina L.	Asteraceae	Croatia	flower	EO	Clostridium perfringens	+	MIC	64	µg/mL	N	368	Infectious diseases						X
Centaurea ragusina L.	Centaurea	ragusina L.	Asteraceae	Croatia	leaf	EO	Clostridium perfringens	+	MIC	64	µg/mL	N	368	Infectious diseases						X
Centaurea ragusina L.	Centaurea	ragusina L.	Asteraceae	Croatia	leaf	EO	Enterococcus faecalis	+	MIC	64	µg/mL	N	368	Infectious diseases						X
Centaurea ragusina L.	Centaurea	ragusina L.	Asteraceae	Croatia	leaf	EO	Escherichia coli	-	MIC	64	µg/mL	N	368	Infectious diseases						X
Centaurea ragusina L.	Centaurea	ragusina L.	Asteraceae	Croatia	leaf	EO	Klebsiella pneumoniae	-	MIC	64	µg/mL	N	368	Infectious diseases						X
Centaurea ragusina L.	Centaurea	ragusina L.	Asteraceae	Croatia	flower	EO	Klebsiella pneumoniae	-	MIC	64	µg/mL	N	368	Infectious diseases						X
Centaurea ragusina L.	Centaurea	ragusina L.	Asteraceae	Croatia	leaf	EO	Staphylococcus aureus	+	MIC	64	µg/mL	N	368	Infectious diseases						X
Centaurea ragusina L.	Centaurea	ragusina L.	Asteraceae	Croatia	leaf	EO	Bacillus cereus	+	MIC	128	µg/mL	N	368	Infectious diseases						X
Centaurea ragusina L.	Centaurea	ragusina L.	Asteraceae	Croatia	leaf	EO	Cronobacter sakazakii	-	MIC	128	µg/mL	N	368	Infectious diseases						X
Centaurea ragusina L.	Centaurea	ragusina L.	Asteraceae	Croatia	flower	EO	Escherichia coli	-	MIC	128	µg/mL	N	368	Infectious diseases						X
Centaurea ragusina L.	Centaurea	ragusina L.	Asteraceae	Croatia	flower	EO	Pseudomonas aeruginosa	-	MIC	128	µg/mL	N	368	Infectious diseases						X
Centaurea ragusina L.	Centaurea	ragusina L.	Asteraceae	Croatia	leaf	EO	Pseudomonas aeruginosa	-	MIC	128	µg/mL	N	368	Infectious diseases						X
Cephalanthus natalensis Oliv.	Cephalanthus	natalensis Oliv.	Rubiaceae	South Africa	leaf	CAcet	Mycobacterium tuberculosis	+	MIC	40	µg/mL	N	36	NS	X
Cephalanthus natalensis Oliv.	Cephalanthus	natalensis Oliv.	Rubiaceae	South Africa	leaf	CAcet	Mycobacterium aurum	+	MIC	100	µg/mL	N	36	NS	X
Cephalanthus natalensis Oliv.	Cephalanthus	natalensis Oliv.	Rubiaceae	South Africa	leaf	CAcet	Mycobacterium smegmatis	+	MIC	170	µg/mL	N	36	NS	X
Cephalanthus natalensis Oliv.	Cephalanthus	natalensis Oliv.	Rubiaceae	South Africa	leaf	CAcet	Mycobacterium bovis	+	MIC	470	µg/mL	N	36	NS	X
Cephalanthus natalensis Oliv.	Cephalanthus	natalensis Oliv.	Rubiaceae	South Africa	leaf	CAcet	Micrococcus luteus	+	MIC	17	µg/mL	N	37	NS	X
Cephalanthus natalensis Oliv.	Cephalanthus	natalensis Oliv.	Rubiaceae	South Africa	leaf	CAcet	Mycobacterium tuberculosis	+	MIC	40	µg/mL	N	37	NS	X
Cephalanthus natalensis Oliv.	Cephalanthus	natalensis Oliv.	Rubiaceae	South Africa	leaf	CAcet	Mycobacterium aurum	+	MIC	100	µg/mL	N	37	NS	X
Ceratonia siliqua L.	Ceratonia	siliqua L.	Fabaceae	Italy	leaf	CM	Listeria monocytogenes	+	MIC	28.12	µg/mL	Y	12	anti-diarrheal, diuretic, antioxidant					X	X	X
Chamaemelum nobile (L.) All.	Chamaemelum	nobile (L.) All.	Asteraceae	NS	flower	EO	Staphylococcus aureus	+	MIC	200	µg/mL	Y	440	NS	X
Chiliadenus iphionoides (Boiss. & Blanche) Brullo	Chiliadenus	iphionoides (Boiss. & Blanche) Brullo	Asteraceae	Jordan	NS	CE	Enterococcus faecium	+	MIC	130	µg/mL	N	287	management of infectious diseases						X
Chilocarpus costatus Miq.	Chilocarpus	costatus Miq.	Anacardiaceae	Malaysia	NS	CChl	Staphylococcus epidermidis	+	MIC	187.5	µg/mL	N	338	used against L. donovani and P. falciparum						X
Chromolaena laevigata (Lam.) R.M. King & H. Rob.	Chromolaena	laevigata (Lam.) R.M. King & H. Rob.	Asteraceae	Brazil	stem	EO	Staphylococcus aureus	+	MIC	62.5	µg/mL	N	319	treatment of lesions, oral thrush			X									X
Chromolaena laevigata (Lam.) R.M. King & H. Rob.	Chromolaena	laevigata (Lam.) R.M. King & H. Rob.	Asteraceae	Brazil	leaf	EO	Staphylococcus aureus	+	MIC	62.5	µg/mL	N	319	treatment of lesions, oral thrush			X									X
Chromolaena laevigata (Lam.) R.M. King & H. Rob.	Chromolaena	laevigata (Lam.) R.M. King & H. Rob.	Asteraceae	Brazil	stem	EO	Escherichia coli	-	MIC	500	µg/mL	N	319	treatment of lesions, oral thrush			X									X
Chromolaena laevigata (Lam.) R.M. King & H. Rob.	Chromolaena	laevigata (Lam.) R.M. King & H. Rob.	Asteraceae	Brazil	leaf	EO	Escherichia coli	-	MIC	500	µg/mL	N	319	treatment of lesions, oral thrush			X									X
Chromolaena laevigata (Lam.) R.M. King & H. Rob.	Chromolaena	laevigata (Lam.) R.M. King & H. Rob.	Asteraceae	Brazil	stem	EO	Pseudomonas aeruginosa	-	MIC	500	µg/mL	N	319	treatment of lesions, oral thrush			X									X
Chromolaena laevigata (Lam.) R.M. King & H. Rob.	Chromolaena	laevigata (Lam.) R.M. King & H. Rob.	Asteraceae	Brazil	leaf	EO	Pseudomonas aeruginosa	-	MIC	500	µg/mL	N	319	treatment of lesions, oral thrush			X									X
Chromolaena laevigata (Lam.) R.M. King & H. Rob.	Chromolaena	laevigata (Lam.) R.M. King & H. Rob.	Asteraceae	Brazil	capitula	EO	Staphylococcus aureus	+	MIC	500	µg/mL	N	319	treatment of lesions, oral thrush			X									X
Chrysopogon zizanioides (L.) Roberty	Chrysopogon	zizanioides (L.) Roberty	Lamiaceae	NS	root	EO	Staphylococcus aureus	+	MIC	50	µg/mL	N	440	NS	X
Cienfuegosia digitata Cav.	Cienfuegosia	digitata Cav.	Malvaceae	Burkina Faso	NS	Fr.	Staphylococcus aureus (MRSA)	+	MIC	25	µg/mL	N	235	infections, cough, dysentery, diarrhea, fever, malaria					X	X							X
Cinnamomum altissimum Kosterm.	Cinnamomum	altissimum Kosterm.	Lauraceae	Malaysia	stem bark	EO	Staphylococcus aureus (MRSA)	+	MIC	156.25	µg/mL	N	82	treat wound infections			X
Cinnamomum bejohlgota (Buch.-Ham.) Sweet	Cinnamomum	bejohlgota (Buch.-Ham.) Sweet	Lauraceae	Thailand	wood	NS	Streptococcus pyogenes	+	MIC	125	µg/mL	N	264	NS	X
Cinnamomum bejohlgota (Buch.-Ham.) Sweet	Cinnamomum	bejohlgota (Buch.-Ham.) Sweet	Lauraceae	Thailand	bark	NS	Streptococcus pyogenes	+	MIC	250	µg/mL	N	264	NS	X
Cinnamomum camphora (L.) J.Presl	Cinnamomum	camphora (L.) J.Presl	Lauraceae	Nepal	leaf, seed, bark	CE	Streptococcus pyogenes	+	MIC	49	µg/mL	N	286	antiseptic, bronchitis, bronchopneumonia, epilepsy						X				X			X
Cinnamomum camphora (L.) J.Presl	Cinnamomum	camphora (L.) J.Presl	Lauraceae	Vietnam	branch, leaf	CM	Bacillus subtilis	+	MIC	125	µg/mL	N	462	abdominal pain, antiseptic, antiinflammatory					X	X
Cinnamomum camphora (L.) J.Presl	Cinnamomum	camphora (L.) J.Presl	Lauraceae	Vietnam	branch, leaf	CM	Bacillus cereus	+	MIC	250	µg/mL	N	462	abdominal pain, antiseptic, antiinflammatory					X	X
Cinnamomum camphora (L.) J.Presl	Cinnamomum	camphora (L.) J.Presl	Lauraceae	Vietnam	branch, leaf	CM	Staphylococcus aureus	+	MIC	500	µg/mL	N	462	abdominal pain, antiseptic, antiinflammatory					X	X
Cinnamomum cassia (L.) J.Presl	Cinnamomum	cassia (L.) J.Presl	Lauraceae	Italy	leaf	EO	Staphylococcus aureus	+	MIC	12.5	μL/mL	Y	84	NS	X
Cinnamomum cassia (L.) J.Presl	Cinnamomum	cassia (L.) J.Presl	Lauraceae	NS	branch	EO	Escherichia coli	-	MIC	50	µg/mL	Y	440	NS	X
Cinnamomum cassia (L.) J.Presl	Cinnamomum	cassia (L.) J.Presl	Lauraceae	NS	branch	EO	Staphylococcus aureus	+	MIC	50	µg/mL	Y	440	NS	X
Cinnamomum crassinervium Miq.	Cinnamomum	crassinervium Miq.	Lauraceae	Malaysia	bark	EO	Listeria monocytogenes	+	MIC	63	µg/mL	N	448	food and beverage industries as food flavoring, food additives, against meat spoilage organisms, fungitoxic properties against respiratory tract mycoses						X
Cinnamomum crassinervium Miq.	Cinnamomum	crassinervium Miq.	Lauraceae	Malaysia	bark	EO	Salmonella enteritidis	-	MIC	125	µg/mL	N	448	food and beverage industries as food flavoring, food additives, against meat spoilage organisms, fungitoxic properties against respiratory tract mycoses						X
Cinnamomum crassinervium Miq.	Cinnamomum	crassinervium Miq.	Lauraceae	Malaysia	bark	EO	Salmonella typhimurium	-	MIC	125	µg/mL	N	448	food and beverage industries as food flavoring, food additives, against meat spoilage organisms, fungitoxic properties against respiratory tract mycoses						X
Cinnamomum crassinervium Miq.	Cinnamomum	crassinervium Miq.	Lauraceae	Malaysia	bark	EO	Staphylococcus aureus	+	MIC	125	µg/mL	N	448	food and beverage industries as food flavoring, food additives, against meat spoilage organisms, fungitoxic properties against respiratory tract mycoses						X
Cinnamomum cuspidatum Miq.	Cinnamomum	cuspidatum Miq.	Lauraceae	Malaysia	bark	EO	Listeria monocytogenes	+	MIC	63	µg/mL	N	448	food and beverage industries as food flavoring, food additives, against meat spoilage organisms, fungitoxic properties against respiratory tract mycoses						X
Cinnamomum cuspidatum Miq.	Cinnamomum	cuspidatum Miq.	Lauraceae	Malaysia	bark	EO	Staphylococcus aureus	+	MIC	250	µg/mL	N	448	food and beverage industries as food flavoring, food additives, against meat spoilage organisms, fungitoxic properties against respiratory tract mycoses						X
Cinnamomum cuspidatum Miq.	Cinnamomum	cuspidatum Miq.	Lauraceae	Malaysia	bark	EO	Salmonella enteritidis	-	MIC	500	µg/mL	N	448	food and beverage industries as food flavoring, food additives, against meat spoilage organisms, fungitoxic properties against respiratory tract mycoses						X
Cinnamomum cuspidatum Miq.	Cinnamomum	cuspidatum Miq.	Lauraceae	Malaysia	bark	EO	Salmonella typhimurium	-	MIC	500	µg/mL	N	448	food and beverage industries as food flavoring, food additives, against meat spoilage organisms, fungitoxic properties against respiratory tract mycoses						X
Cinnamomum impressicostatum Kosterm.	Cinnamomum	impressicostatum Kosterm.	Lauraceae	Malaysia	stem bark	CA	Staphylococcus aureus (MRSA)	+	MIC	19.53	µg/mL	N	82	treat wound infections			X
Cinnamomum impressicostatum Kosterm.	Cinnamomum	impressicostatum Kosterm.	Lauraceae	Malaysia	stem bark	EO	Staphylococcus aureus (MRSA)	+	MIC	156.25	µg/mL	N	82	treat wound infections			X
Cinnamomum iners Reinw. ex Blume	Cinnamomum	iners Reinw. ex Blume	Lauraceae	Malaysia	stem bark	CEtOAc	Staphylococcus aureus (MRSA)	+	MIC	156.25	µg/mL	N	82	treat wound infections			X
Cinnamomum javanicum Blume	Cinnamomum	javanicum Blume	Lauraceae	Malaysia	bark	EO	Listeria monocytogenes	+	MIC	125	µg/mL	N	448	food and beverage industries as food flavoring, food additives, against meat spoilage organisms, fungitoxic properties against respiratory tract mycoses						X
Cinnamomum javanicum Blume	Cinnamomum	javanicum Blume	Lauraceae	Malaysia	bark	EO	Salmonella enteritidis	-	MIC	250	µg/mL	N	448	food and beverage industries as food flavoring, food additives, against meat spoilage organisms, fungitoxic properties against respiratory tract mycoses						X
Cinnamomum javanicum Blume	Cinnamomum	javanicum Blume	Lauraceae	Malaysia	bark	EO	Salmonella typhimurium	-	MIC	250	µg/mL	N	448	food and beverage industries as food flavoring, food additives, against meat spoilage organisms, fungitoxic properties against respiratory tract mycoses						X
Cinnamomum javanicum Blume	Cinnamomum	javanicum Blume	Lauraceae	Malaysia	bark	EO	Staphylococcus aureus	+	MIC	250	µg/mL	N	448	food and beverage industries as food flavoring, food additives, against meat spoilage organisms, fungitoxic properties against respiratory tract mycoses						X
Cinnamomum javanicum Blume	Cinnamomum	javanicum Blume	Lauraceae	Singapore	leaf, stem	CAcet/M/A (2:2:1)	Listeria monocytogenes	+	MIC	130	µg/mL	N	472	stomach ache, fatigue, chest pain, spleen diseases		X			X	X
Cinnamomum longepaniculatum (Gamble) N. Chao ex H.W.	Cinnamomum	longepaniculatum (Gamble) N. Chao ex H.W.	Lauraceae	China	leaf	EO	Escherichia coli	-	MIC	3.125	µg/mL	N	261	NS	X
Cinnamomum longepaniculatum (Gamble) N. Chao ex H.W.	Cinnamomum	longepaniculatum (Gamble) N. Chao ex H.W.	Lauraceae	China	leaf	EO	Salmonella enteritidis	-	MIC	6.25	µg/mL	N	261	NS	X
Cinnamomum longepaniculatum (Gamble) N. Chao ex H.W.	Cinnamomum	longepaniculatum (Gamble) N. Chao ex H.W.	Lauraceae	China	leaf	EO	Staphylococcus aureus	+	MIC	6.25	µg/mL	N	261	NS	X
Cinnamomum politum Miq.	Cinnamomum	politum Miq.	Lauraceae	Malaysia	bark	EO	Listeria monocytogenes	+	MIC	250	µg/mL	N	448	food and beverage industries as food flavoring, food additives, against meat spoilage organisms, fungitoxic properties against respiratory tract mycoses						X
Cinnamomum politum Miq.	Cinnamomum	politum Miq.	Lauraceae	Malaysia	bark	EO	Salmonella typhimurium	-	MIC	250	µg/mL	N	448	food and beverage industries as food flavoring, food additives, against meat spoilage organisms, fungitoxic properties against respiratory tract mycoses						X
Cinnamomum politum Miq.	Cinnamomum	politum Miq.	Lauraceae	Malaysia	bark	EO	Salmonella enteritidis	-	MIC	500	µg/mL	N	448	food and beverage industries as food flavoring, food additives, against meat spoilage organisms, fungitoxic properties against respiratory tract mycoses						X
Cinnamomum politum Miq.	Cinnamomum	politum Miq.	Lauraceae	Malaysia	bark	EO	Staphylococcus aureus	+	MIC	500	µg/mL	N	448	food and beverage industries as food flavoring, food additives, against meat spoilage organisms, fungitoxic properties against respiratory tract mycoses						X
Cinnamomum porrectum (Roxb.) Kosterm.	Cinnamomum	porrectum (Roxb.) Kosterm.	Lauraceae	Thailand	wood	NS	Streptococcus pyogenes	+	MIC	250	µg/mL	N	264	NS	X
Cinnamomum porrectum (Roxb.) Kosterm.	Cinnamomum	porrectum (Roxb.) Kosterm.	Lauraceae	Thailand	bark	NS	Streptococcus pyogenes	+	MIC	500	µg/mL	N	264	NS	X
Cinnamomum racemosum Kosterm	Cinnamomum	racemosum Kosterm	Lauraceae	Malaysia	bark	EO	Listeria monocytogenes	+	MIC	500	µg/mL	N	448	food and beverage industries as food flavoring, food additives, against meat spoilage organisms, fungitoxic properties against respiratory tract mycoses						X
Cinnamomum sp.	Cinnamomum	sp.	Lauraceae	Malaysia	bark	EO	Listeria monocytogenes	+	MIC	125	µg/mL	N	448	food and beverage industries as food flavoring, food additives, against meat spoilage organisms, fungitoxic properties against respiratory tract mycoses						X
Cinnamomum sp.	Cinnamomum	sp.	Lauraceae	Malaysia	bark	EO	Salmonella enteritidis	-	MIC	250	µg/mL	N	448	food and beverage industries as food flavoring, food additives, against meat spoilage organisms, fungitoxic properties against respiratory tract mycoses						X
Cinnamomum sp.	Cinnamomum	sp.	Lauraceae	Malaysia	bark	EO	Salmonella typhimurium	-	MIC	250	µg/mL	N	448	food and beverage industries as food flavoring, food additives, against meat spoilage organisms, fungitoxic properties against respiratory tract mycoses						X
Cinnamomum sp.	Cinnamomum	sp.	Lauraceae	Malaysia	bark	EO	Staphylococcus aureus	+	MIC	250	µg/mL	N	448	food and beverage industries as food flavoring, food additives, against meat spoilage organisms, fungitoxic properties against respiratory tract mycoses						X
Cinnamomum verum J.Presl	Cinnamomum	verum J.Presl	Lauraceae	Iran	NS	EO	Bacillus cereus	+	MIC	312	µg/mL	N	26	antibacterial						X
Cinnamomum verum J.Presl	Cinnamomum	verum J.Presl	Lauraceae	Iran	NS	EO	Listeria monocytogenes	+	MIC	312	µg/mL	N	26	antibacterial						X
Cinnamomum verum J.Presl	Cinnamomum	verum J.Presl	Lauraceae	Brazil	bark	EO	Escherichia coli	-	MIC	250	µg/mL	Y	53	antifungal, anti-parasitic, antibacterial, larvicidal properties					X	X
Cinnamomum verum J.Presl	Cinnamomum	verum J.Presl	Lauraceae	Brazil	bark	EO	Salmonella enteritidis	-	MIC	250	µg/mL	Y	53	antifungal, anti-parasitic, antibacterial, larvicidal properties					X	X
Cinnamomum verum J.Presl	Cinnamomum	verum J.Presl	Lauraceae	Brazil	bark	EO	Salmonella sp.	-	MIC	250	µg/mL	Y	53	antifungal, anti-parasitic, antibacterial, larvicidal properties					X	X
Cinnamomum verum J.Presl	Cinnamomum	verum J.Presl	Lauraceae	Brazil	bark	EO	Salmonella typhimurium	-	MIC	250	µg/mL	Y	53	antifungal, anti-parasitic, antibacterial, larvicidal properties					X	X
Cinnamomum verum J.Presl	Cinnamomum	verum J.Presl	Lauraceae	Brazil	bark	EO	Staphylococcus aureus	+	MIC	250	µg/mL	Y	53	antifungal, anti-parasitic, antibacterial, larvicidal properties					X	X
Cinnamomum verum J.Presl	Cinnamomum	verum J.Presl	Lauraceae	Brazil	bark	EO	Staphylococcus aureus (MRSA)	+	MIC	250	µg/mL	Y	53	antifungal, anti-parasitic, antibacterial, larvicidal properties					X	X
Cinnamomum verum J.Presl	Cinnamomum	verum J.Presl	Lauraceae	NS	NS	EO	Actinomyces naeslundii	+	MIC	125	µg/mL	N	56	NS	X
Cinnamomum verum J.Presl	Cinnamomum	verum J.Presl	Lauraceae	NS	NS	EO	Fusobacterium nucleatum	-	MIC	125	µg/mL	N	56	NS	X
Cinnamomum verum J.Presl	Cinnamomum	verum J.Presl	Lauraceae	NS	NS	EO	Prevotella nigrescens	-	MIC	125	µg/mL	N	56	NS	X
Cinnamomum verum J.Presl	Cinnamomum	verum J.Presl	Lauraceae	NS	NS	EO	Streptococcus mutans	+	MIC	200	µg/mL	N	56	NS	X
Cinnamomum verum J.Presl	Cinnamomum	verum J.Presl	Lauraceae	Spain	NS	EO	Acinetobacter baumannii	-	MIC	200	µg/mL	Y	59	NS	X
Cinnamomum verum J.Presl	Cinnamomum	verum J.Presl	Lauraceae	Spain	NS	EO	Citrobacter freundii	-	MIC	200	µg/mL	Y	59	NS	X
Cinnamomum verum J.Presl	Cinnamomum	verum J.Presl	Lauraceae	Spain	NS	EO	Enterobacter cloacae	-	MIC	200	µg/mL	Y	59	NS	X
Cinnamomum verum J.Presl	Cinnamomum	verum J.Presl	Lauraceae	Spain	NS	EO	Escherichia coli	-	MIC	200	µg/mL	Y	59	NS	X
Cinnamomum verum J.Presl	Cinnamomum	verum J.Presl	Lauraceae	Spain	NS	EO	Morganella morganii	-	MIC	200	µg/mL	Y	59	NS	X
Cinnamomum verum J.Presl	Cinnamomum	verum J.Presl	Lauraceae	Spain	NS	EO	Proteus mirabilis	-	MIC	200	µg/mL	Y	59	NS	X
Cinnamomum verum J.Presl	Cinnamomum	verum J.Presl	Lauraceae	Spain	NS	EO	Proteus penneri	-	MIC	200	µg/mL	Y	59	NS	X
Cinnamomum verum J.Presl	Cinnamomum	verum J.Presl	Lauraceae	Spain	NS	EO	Salmonella enterica	-	MIC	200	µg/mL	Y	59	NS	X
Cinnamomum verum J.Presl	Cinnamomum	verum J.Presl	Lauraceae	Spain	NS	EO	Klebsiella oxytoca	-	MIC	400	µg/mL	Y	59	NS	X
Cinnamomum verum J.Presl	Cinnamomum	verum J.Presl	Lauraceae	Spain	NS	EO	Klebsiella pneumoniae	-	MIC	400	µg/mL	Y	59	NS	X
Cinnamomum verum J.Presl	Cinnamomum	verum J.Presl	Lauraceae	Spain	NS	EO	Pseudomonas aeruginosa	-	MIC	400	µg/mL	Y	59	NS	X
Cinnamomum verum J.Presl	Cinnamomum	verum J.Presl	Lauraceae	Spain	NS	EO	Serratia marcescens	-	MIC	400	µg/mL	Y	59	NS	X
Cinnamomum verum J.Presl	Cinnamomum	verum J.Presl	Lauraceae	Brazil	leaf	EO	Fusobacterium nucleatum	-	MIC	250	µg/mL	N	66	antimicrobial activity against oral biofilms												X
Cinnamomum verum J.Presl	Cinnamomum	verum J.Presl	Lauraceae	Brazil	leaf	EO	Porphyromonas gingivalis	-	MIC	250	µg/mL	N	66	antimicrobial activity against oral biofilms												X
Cinnamomum verum J.Presl	Cinnamomum	verum J.Presl	Lauraceae	Brazil	leaf	EO	Streptococcus mitis	+	MIC	500	µg/mL	N	66	antimicrobial activity against oral biofilms												X
Cinnamomum verum J.Presl	Cinnamomum	verum J.Presl	Lauraceae	Brazil	leaf	EO	Streptococcus sanguinis	+	MIC	500	µg/mL	N	66	antimicrobial activity against oral biofilms												X
Cinnamomum verum J.Presl	Cinnamomum	verum J.Presl	Lauraceae	Thailand	bark	CA	Acinetobacter baumannii	-	MIC	250	µg/mL	Y	207	NS	X
Cinnamomum verum J.Presl	Cinnamomum	verum J.Presl	Lauraceae	Thailand	bark	CA	Acinetobacter baumannii	-	MIC	250	µg/mL	Y	207	NS	X
Cinnamomum verum J.Presl	Cinnamomum	verum J.Presl	Lauraceae	Pakistan	bark	CE	Staphylococcus aureus (VRSA)	+	MIC	128	µg/mL	Y	262	NS	X
Cinnamomum verum J.Presl	Cinnamomum	verum J.Presl	Lauraceae	NS	NS	EO	Haemophilus ducreyi	-	MIC	103	µg/mL	N	268	NS	X
Cinnamomum verum J.Presl	Cinnamomum	verum J.Presl	Lauraceae	NS	NS	EO	Haemophilus ducreyi	-	MIC	260	µg/mL	N	268	NS	X
Cinnamomum verum J.Presl	Cinnamomum	verum J.Presl	Lauraceae	Ethiopia	bark	EO	Streptococcus sp.	+	MIC	0.63	μL/mL	Y	325	NS	X
Cinnamomum verum J.Presl	Cinnamomum	verum J.Presl	Lauraceae	Ethiopia	bark	EO	Bacillus spp.	+	MIC	1.25	μL/mL	Y	325	NS	X
Cinnamomum verum J.Presl	Cinnamomum	verum J.Presl	Lauraceae	Ethiopia	bark	EO	Escherichia coli	-	MIC	1.25	μL/mL	Y	325	NS	X
Cinnamomum verum J.Presl	Cinnamomum	verum J.Presl	Lauraceae	Ethiopia	bark	EO	Shigella spp.	-	MIC	1.25	μL/mL	Y	325	NS	X
Cinnamomum verum J.Presl	Cinnamomum	verum J.Presl	Lauraceae	Cameroon	bark	CM	Enterobacter aerogenes	-	MIC	256	µg/mL	N	400	Digestive disorders, anti dysentery, laxative					X
Cinnamomum verum J.Presl	Cinnamomum	verum J.Presl	Lauraceae	Cameroon	bark	CM	Klebsiella pneumoniae	-	MIC	256	µg/mL	N	400	Digestive disorders, anti dysentery, laxative					X
Cinnamomum verum J.Presl	Cinnamomum	verum J.Presl	Lauraceae	Cameroon	bark	CM	Providencia stuartii	-	MIC	256	µg/mL	N	400	Digestive disorders, anti dysentery, laxative					X
Cinnamomum verum J.Presl	Cinnamomum	verum J.Presl	Lauraceae	NS	bark	EO	Escherichia coli	-	MIC	50	µg/mL	Y	440	NS	X
Cinnamomum verum J.Presl	Cinnamomum	verum J.Presl	Lauraceae	NS	bark	EO	Staphylococcus aureus	+	MIC	50	µg/mL	Y	440	NS	X
Cinnamomum verum J.Presl	Cinnamomum	verum J.Presl	Lauraceae	NS	bark	EO	Staphylococcus aureus	+	MIC	0.78	μL/mL	Y	447	NS	X
Cinnamomum verum J.Presl	Cinnamomum	verum J.Presl	Lauraceae	NS	bark	EO	Staphylococcus hyicus	+	MIC	0.78	μL/mL	Y	447	NS	X
Cinnamomum verum J.Presl	Cinnamomum	verum J.Presl	Lauraceae	Cameroon	leaf	CM	Escherichia coli	-	MIC	64	µg/mL	N	458	cancer						X
Cissampelos capensis L. f.	Cissampelos	capensis L. f.	Menispermaceae	South Africa	leaf	CDichl	Cutibacterium acnes	+	MIC	250	µg/mL	N	273	boil, snakebite, ulcer, syphilis sores			X					X
Cissampelos capensis L. f.	Cissampelos	capensis L. f.	Menispermaceae	South Africa	leaf	CA	Cutibacterium acnes	+	MIC	500	µg/mL	N	273	boil, snakebite, ulcer, syphilis sores			X					X
Cissampelos hirta Klotzsch	Cissampelos	hirta Klotzsch	Menispermaceae	South Africa	whole plant	CM/Dichl (1:1)	Shigella flexneri	-	MIC	380	µg/mL	N	452	diarrhea					X
Cissampelos hirta Klotzsch	Cissampelos	hirta Klotzsch	Menispermaceae	South Africa	whole plant	CM/Dichl (1:1)	Enterococcus faecalis	+	MIC	420	µg/mL	N	452	diarrhea					X
Cissampelos pareira L.	Cissampelos	pareira L.	Menispermaceae	India	leaf	CM	Bacillus cereus	+	MIC	500	µg/mL	N	358	NS	X
Cissampelos pareira L.	Cissampelos	pareira L.	Menispermaceae	India	leaf	CM	Shigella flexneri	-	MIC	500	µg/mL	N	358	NS	X
Cissus quadrangularis L	Cissus	quadrangularis L	Vitaceae	Zimbabwe	stem	CAcet	Staphylococcus aureus	+	MIC	210	µg/mL	Y	329	Fungicidal, antihelmintic, wound healing and antiinflamatory						X
Cissus quadrangularis L	Cissus	quadrangularis L	Vitaceae	Zimbabwe	stem	CM	Staphylococcus aureus	+	MIC	420	µg/mL	Y	329	Fungicidal, antihelmintic, wound healing and antiinflamatory						X
Cissus welwitschii (Baker) Planch.	Cissus	welwitschii (Baker) Planch.	Vitaceae	Zimbabwe	leaf	CM	Escherichia coli	-	MIC	500	µg/mL	N	315	cancer						X
Cistus ladaniferus Stokes	Cistus	ladaniferus Stokes	Cistaceae	NS	branch, leaf	EO	Staphylococcus aureus	+	MIC	400	µg/mL	N	440	NS	X
Cistus monspeliensis L.	Cistus	monspeliensis L.	Cistaceae	Italy	aerial part	CM	Staphylococcus aureus	+	IC50	5.3	µg/mL	N	284	NS	X
Cistus monspeliensis L.	Cistus	monspeliensis L.	Cistaceae	Italy	aerial part	CM	Staphylococcus epidermidis	+	IC50	12.4	µg/mL	N	284	NS	X
Cistus monspeliensis L.	Cistus	monspeliensis L.	Cistaceae	Italy	aerial part	CM	Klebsiella pneumoniae	-	IC50	64.65	µg/mL	N	284	NS	X
Cistus salviifolius L.	Cistus	salviifolius L.	Cistaceae	Italy	aerial part	CM	Staphylococcus aureus	+	IC50	9	µg/mL	N	284	NS	X
Cistus salviifolius L.	Cistus	salviifolius L.	Cistaceae	Italy	aerial part	CM	Staphylococcus epidermidis	+	IC50	29.5	µg/mL	N	284	NS	X
Cistus salviifolius L.	Cistus	salviifolius L.	Cistaceae	Italy	aerial part	CM	Klebsiella pneumoniae	-	IC50	97.5	µg/mL	N	284	NS	X
Citharexylum flexuosum (Ruiz & Pav.) D.Do	Citharexylum	flexuosum (Ruiz & Pav.) D.Do	Verbenaceae	Cameroon	Bark	CM	Escherichia coli	-	MIC	128	µg/mL	N	461	antimycobacterial, antibacterial, antioxidant						X
Citharexylum flexuosum (Ruiz & Pav.) D.Do	Citharexylum	flexuosum (Ruiz & Pav.) D.Do	Verbenaceae	Cameroon	leaf	CM	Pseudomonas aeruginosa	-	MIC	128	µg/mL	N	461	antimycobacterial, antibacterial, antioxidant (Camaroon)						X
Citharexylum flexuosum (Ruiz & Pav.) D.Do	Citharexylum	flexuosum (Ruiz & Pav.) D.Do	Verbenaceae	Cameroon	leaf	CM	Staphylococcus aureus	+	MIC	128	µg/mL	N	461	antimycobacterial, antibacterial, antioxidant						X
Citharexylum flexuosum (Ruiz & Pav.) D.Do	Citharexylum	flexuosum (Ruiz & Pav.) D.Do	Verbenaceae	Cameroon	leaf	CM	Enterobacter aerogenes	-	MIC	256	µg/mL	N	461	antimycobacterial, antibacterial, antioxidant						X
Citharexylum flexuosum (Ruiz & Pav.) D.Do	Citharexylum	flexuosum (Ruiz & Pav.) D.Do	Verbenaceae	Cameroon	leaf	CM	Enterobacter cloacae	-	MIC	256	µg/mL	N	461	antimycobacterial, antibacterial, antioxidant						X
Citharexylum flexuosum (Ruiz & Pav.) D.Do	Citharexylum	flexuosum (Ruiz & Pav.) D.Do	Verbenaceae	Cameroon	leaf	CM	Escherichia coli	-	MIC	256	µg/mL	N	461	antimycobacterial, antibacterial, antioxidant						X
Citharexylum flexuosum (Ruiz & Pav.) D.Do	Citharexylum	flexuosum (Ruiz & Pav.) D.Do	Verbenaceae	Cameroon	leaf	CM	Providencia stuartii	-	MIC	256	µg/mL	N	461	antimycobacterial, antibacterial, antioxidant						X
Citharexylum spinosum L.	Citharexylum	spinosum L.	Verbenaceae	Egypt	leaf	CChl	Escherichia coli	-	MIC	128	µg/mL	N	41	NS	X
Citharexylum spinosum L.	Citharexylum	spinosum L.	Verbenaceae	Egypt	leaf	CChl	Pectobacterium atrosepticum	-	MIC	500	µg/mL	N	41	NS	X
Citrullus colocynthis (L.) Schrad.	Citrullus	colocynthis (L.) Schrad.	Cucurbitaceae	India	aerial part	Fr.	Mycobacterium tuberculosis (MDR)	+	MIC	31.2	µg/mL	N	295	treatment of tuberculosis and bacterial infections						X
Citrullus colocynthis (L.) Schrad.	Citrullus	colocynthis (L.) Schrad.	Cucurbitaceae	India	aerial part	Fr.	Mycobacterium tuberculosis (Non-MDR)	+	MIC	31.2	µg/mL	N	295	treatment of tuberculosis and bacterial infections						X
Citrullus colocynthis (L.) Schrad.	Citrullus	colocynthis (L.) Schrad.	Cucurbitaceae	India	aerial part	Fr.	Mycobacterium tuberculosis (XDR)	+	MIC	31.2	µg/mL	N	295	treatment of tuberculosis and bacterial infections						X
Citrullus colocynthis (L.) Schrad.	Citrullus	colocynthis (L.) Schrad.	Cucurbitaceae	India	fruit	CM	Pseudomonas aeruginosa	-	MIC	12.5	µg/mL	N	420	treatment of constipation, edema, bacterial infections, cancer and diabetes		X		X	X	X
Citrullus colocynthis (L.) Schrad.	Citrullus	colocynthis (L.) Schrad.	Cucurbitaceae	India	fruit	CM	Staphylococcus aureus	+	MIC	12.5	µg/mL	N	420	treatment of constipation, edema, bacterial infections, cancer and diabetes		X		X	X	X
Citrullus colocynthis (L.) Schrad.	Citrullus	colocynthis (L.) Schrad.	Cucurbitaceae	India	fruit	CM	Escherichia coli	-	MIC	25	µg/mL	N	420	treatment of constipation, edema, bacterial infections, cancer and diabetes		X		X	X	X
Citrullus colocynthis (L.) Schrad.	Citrullus	colocynthis (L.) Schrad.	Cucurbitaceae	India	fruit	Fr.	Klebsiella pneumoniae	-	MIC	25	µg/mL	N	420	treatment of constipation, edema, bacterial infections, cancer and diabetes		X		X	X	X
Citrullus colocynthis (L.) Schrad.	Citrullus	colocynthis (L.) Schrad.	Cucurbitaceae	India	fruit	CM	Proteus mirabilis	-	MIC	25	µg/mL	N	420	treatment of constipation, edema, bacterial infections, cancer and diabetes		X		X	X	X
Citrullus colocynthis (L.) Schrad.	Citrullus	colocynthis (L.) Schrad.	Cucurbitaceae	India	fruit	Fr.	Pseudomonas aeruginosa	-	MIC	25	µg/mL	N	420	treatment of constipation, edema, bacterial infections, cancer and diabetes		X		X	X	X
Citrullus colocynthis (L.) Schrad.	Citrullus	colocynthis (L.) Schrad.	Cucurbitaceae	India	fruit	Fr.	Staphylococcus aureus	+	MIC	25	µg/mL	N	420	treatment of constipation, edema, bacterial infections, cancer and diabetes		X		X	X	X
Citrullus colocynthis (L.) Schrad.	Citrullus	colocynthis (L.) Schrad.	Cucurbitaceae	India	fruit	Fr.	Escherichia coli	-	MIC	50	µg/mL	N	420	treatment of constipation, edema, bacterial infections, cancer and diabetes		X		X	X	X
Citrullus colocynthis (L.) Schrad.	Citrullus	colocynthis (L.) Schrad.	Cucurbitaceae	India	fruit	CM	Klebsiella pneumoniae	-	MIC	50	µg/mL	N	420	treatment of constipation, edema, bacterial infections, cancer and diabetes		X		X	X	X
Citrullus colocynthis (L.) Schrad.	Citrullus	colocynthis (L.) Schrad.	Cucurbitaceae	India	fruit	Fr.	Proteus mirabilis	-	MIC	50	µg/mL	N	420	treatment of constipation, edema, bacterial infections, cancer and diabetes		X		X	X	X
Citrus aurantiifolia (Christm.) Swingle	Citrus	aurantiifolia (Christm.) Swingle	Rutaceae	Nigeria	fruit	CM	Bacillus subtilis	+	MIC	157	µg/mL	N	154	anticancer, cellulite, antibacterial, antitumor, antifungal, insomnia, nervous exhaustion			X			X				X
Citrus aurantiifolia (Christm.) Swingle	Citrus	aurantiifolia (Christm.) Swingle	Rutaceae	Nigeria	fruit	CM	Bacillus cereus	+	MIC	313	µg/mL	N	154	anticancer, cellulite, antibacterial, antitumor, antifungal, insomnia, nervous exhaustion			X			X				X
Citrus aurantiifolia (Christm.) Swingle	Citrus	aurantiifolia (Christm.) Swingle	Rutaceae	Nigeria	fruit (juice)	CM	Bacillus cereus	+	MIC	313	µg/mL	N	154	anticancer, cellulite, antibacterial, antitumor, antifungal, insomnia, nervous exhaustion			X			X				X
Citrus aurantiifolia (Christm.) Swingle	Citrus	aurantiifolia (Christm.) Swingle	Rutaceae	Brazil	leaf	EO	Streptococcus mutans	+	MIC	20	µg/mL	Y	259	NS	X
Citrus aurantiifolia (Christm.) Swingle	Citrus	aurantiifolia (Christm.) Swingle	Rutaceae	Brazil	fruit peel	EO	Streptococcus mutans	+	MIC	20	µg/mL	Y	259	NS	X
Citrus aurantiifolia (Christm.) Swingle	Citrus	aurantiifolia (Christm.) Swingle	Rutaceae	Brazil	leaf	EO	Lactobacillus casei	+	MIC	31.25	µg/mL	Y	259	NS	X
Citrus aurantiifolia (Christm.) Swingle	Citrus	aurantiifolia (Christm.) Swingle	Rutaceae	Brazil	fruit peel	EO	Lactobacillus casei	+	MIC	31.25	µg/mL	Y	259	NS	X
Citrus aurantiifolia (Christm.) Swingle	Citrus	aurantiifolia (Christm.) Swingle	Rutaceae	Brazil	leaf	EO	Streptococcus sobrinus	+	MIC	100	µg/mL	Y	259	NS	X
Citrus aurantiifolia (Christm.) Swingle	Citrus	aurantiifolia (Christm.) Swingle	Rutaceae	Brazil	fruit (peel)	EO	Streptococcus sobrinus	+	MIC	100	µg/mL	Y	259	NS	X
Citrus aurantiifolia (Christm.) Swingle	Citrus	aurantiifolia (Christm.) Swingle	Rutaceae	Brazil	leaf	EO	Streptococcus mitis	+	MIC	200	µg/mL	Y	259	NS	X
Citrus aurantiifolia (Christm.) Swingle	Citrus	aurantiifolia (Christm.) Swingle	Rutaceae	Brazil	fruit (peel)	EO	Streptococcus mitis	+	MIC	200	µg/mL	Y	259	NS	X
Citrus aurantiifolia (Christm.) Swingle	Citrus	aurantiifolia (Christm.) Swingle	Rutaceae	Brazil	fruit (peel)	EO	Streptococcus salivarius	+	MIC	200	µg/mL	Y	259	NS	X
Citrus aurantiifolia (Christm.) Swingle	Citrus	aurantiifolia (Christm.) Swingle	Rutaceae	Brazil	leaf	EO	Streptococcus sanguinis	+	MIC	200	µg/mL	Y	259	NS	X
Citrus aurantiifolia (Christm.) Swingle	Citrus	aurantiifolia (Christm.) Swingle	Rutaceae	Brazil	fruit (peel)	EO	Streptococcus sanguinis	+	MIC	200	µg/mL	Y	259	NS	X
Citrus aurantiifolia (Christm.) Swingle	Citrus	aurantiifolia (Christm.) Swingle	Rutaceae	Brazil	leaf	EO	Streptococcus salivarius	+	MIC	400	µg/mL	Y	259	NS	X
Citrus limon (L.) Osbeck	Citrus	limon (L.) Osbeck	Rutaceae	Italy	fruit (juice)	None	Helicobacter pylori	-	MIC	25	μL/mL	Y	166	NS	X
Citrus limon (L.) Osbeck	Citrus	limon (L.) Osbeck	Rutaceae	Italy	fruit (juice)	None	Helicobacter pylori	-	MIC	50	μL/mL	Y	166	NS	X
Citrus limon (L.) Osbeck	Citrus	limon (L.) Osbeck	Rutaceae	South Africa	leaf	CM	Mycobacterium smegmatis	+	MIC	300	µg/mL	Y	234	Tuberculosis related symptoms such as persistent coughing, weight loss, sweating at night and blood in the sputum						X							X
Citrus limon (L.) Osbeck	Citrus	limon (L.) Osbeck	Rutaceae	South Africa	leaf	CDichl	Mycobacterium smegmatis	+	MIC	300	µg/mL	Y	234	Tuberculosis related symptoms such as persistent coughing, weight loss, sweating at night and blood in the sputum						X							X
Citrus limon (L.) Osbeck	Citrus	limon (L.) Osbeck	Rutaceae	Ethiopia	peel	EO	Bacillus spp.	+	MIC	2.5	μL/mL	Y	325	NS	X
Citrus limon (L.) Osbeck	Citrus	limon (L.) Osbeck	Rutaceae	Ethiopia	peel	EO	Escherichia coli	-	MIC	2.5	μL/mL	Y	325	NS	X
Citrus limon (L.) Osbeck	Citrus	limon (L.) Osbeck	Rutaceae	Ethiopia	peel	EO	Shigella spp.	-	MIC	2.5	μL/mL	Y	325	NS	X
Citrus limon (L.) Osbeck	Citrus	limon (L.) Osbeck	Rutaceae	Ethiopia	peel	EO	Streptococcus sp.	+	MIC	2.5	μL/mL	Y	325	NS	X
Citrus maxima (Burm.) Merr.	Citrus	maxima (Burm.) Merr.	Rutaceae	Cameroon	leaf	CM	Enterobacter aerogenes	-	MIC	128	µg/mL	Y	326	NS	X
Citrus maxima (Burm.) Merr.	Citrus	maxima (Burm.) Merr.	Rutaceae	Cameroon	pericarp	CM	Klebsiella pneumoniae	-	MIC	128	µg/mL	Y	326	NS	X
Citrus maxima (Burm.) Merr.	Citrus	maxima (Burm.) Merr.	Rutaceae	Vietnam	leaf, fruit peel	CM	Bacillus cereus	+	MIC	500	µg/mL	Y	462	influenza, headache, abdonimal pain, cough, indigestion					X	X				X			X
Citrus sinensis (L.) Osbeck	Citrus	sinensis (L.) Osbeck	Rutaceae	Tunisia	leaf	EO	Legionella pneumophila	-	MIC	110	µg/mL	N	92	NS	X
Citrus sinensis (L.) Osbeck	Citrus	sinensis (L.) Osbeck	Rutaceae	Cameroon	peel	CM	Escherichia coli	-	MIC	32	µg/mL	Y	142	constipation, cramps, colic, diarrhea, bronchitis, tuberculosis, cough, cold, obesity, menstrual disorder, angina, hypertension, anxiety, depression, and stress, used to soothe sore throats, indigestion, relieve intestinal gas and bloating and resolve phlegm and as an additive for flavoring to our foods		X			X	X		X		X			X
Citrus sinensis (L.) Osbeck	Citrus	sinensis (L.) Osbeck	Rutaceae	Cameroon	peel	CM	Enterobacter aerogenes	-	MIC	128	µg/mL	Y	142	constipation, cramps, colic, diarrhea, bronchitis, tuberculosis, cough, cold, obesity, menstrual disorder, angina, hypertension, anxiety, depression, and stress; used to soothe sore throats, indigestion, relieve intestinal gas and bloating and resolve phlegm and as an additive for flavoring to our foods		X			X	X		X		X			X
Citrus sinensis (L.) Osbeck	Citrus	sinensis (L.) Osbeck	Rutaceae	Cameroon	peel	CM	Klebsiella pneumoniae	-	MIC	128	µg/mL	Y	142	constipation, cramps, colic, diarrhea, bronchitis, tuberculosis, cough, cold, obesity, menstrual disorder, angina, hypertension, anxiety, depression, and stress; used to soothe sore throats, indigestion, relieve intestinal gas and bloating and resolve phlegm and as an additive for flavoring to our foods		X			X	X		X		X			X
Citrus sinensis (L.) Osbeck	Citrus	sinensis (L.) Osbeck	Rutaceae	Cameroon	peel	CM	Providencia stuartii	-	MIC	128	µg/mL	Y	142	constipation, cramps, colic, diarrhea, bronchitis, tuberculosis, cough, cold, obesity, menstrual disorder, angina, hypertension, anxiety, depression, and stress; used to soothe sore throats, indigestion, relieve intestinal gas and bloating and resolve phlegm and as an additive for flavoring to our foods		X			X	X		X		X			X
Citrus sinensis (L.) Osbeck	Citrus	sinensis (L.) Osbeck	Rutaceae	Cameroon	peel	CM	Pseudomonas aeruginosa	-	MIC	128	µg/mL	Y	142	constipation, cramps, colic, diarrhea, bronchitis, tuberculosis, cough, cold, obesity, menstrual disorder, angina, hypertension, anxiety, depression, and stress; used to soothe sore throats, indigestion, relieve intestinal gas and bloating and resolve phlegm and as an additive for flavoring to our foods		X			X	X		X		X			X
Citrus sinensis (L.) Osbeck	Citrus	sinensis (L.) Osbeck	Rutaceae	Cameroon	peel	CM	Enterobacter cloacae	-	MIC	256	µg/mL	Y	142	constipation, cramps, colic, diarrhea, bronchitis, tuberculosis, cough, cold, obesity, menstrual disorder, angina, hypertension, anxiety, depression, and stress; used to soothe sore throats, indigestion, relieve intestinal gas and bloating and resolve phlegm and as an additive for flavoring to our foods		X			X	X		X		X			X
Cladanthus arabicus (L.) Cass.	Cladanthus	arabicus (L.) Cass.	Asteraceae	Morocco	aerial part	EO	Escherichia coli	-	MIC	200	µg/mL	N	9	NS	X
Cladanthus arabicus (L.) Cass.	Cladanthus	arabicus (L.) Cass.	Asteraceae	Morocco	aerial part	EO	Enterobacter cloacae	-	MIC	400	µg/mL	N	9	NS	X
Cladanthus mixtus (L.) Chevall.	Cladanthus	mixtus (L.) Chevall.	Asteraceae	France (Corsica)	aerial part	Fr.	Staphylococcus aureus	+	MIC	82.5	µg/mL	N	117	fever and gastric diseases					X	X
Cladanthus mixtus (L.) Chevall.	Cladanthus	mixtus (L.) Chevall.	Asteraceae	France (Corsica)	aerial part	Fr.	Citrobacter freundii	-	MIC	85.8	µg/mL	N	117	fever and gastric diseases					X	X
Cladanthus mixtus (L.) Chevall.	Cladanthus	mixtus (L.) Chevall.	Asteraceae	France (Corsica)	aerial part	Fr.	Enterococcus faecalis	+	MIC	85.8	µg/mL	N	117	fever and gastric diseases					X	X
Cladanthus mixtus (L.) Chevall.	Cladanthus	mixtus (L.) Chevall.	Asteraceae	France (Corsica)	aerial part	Fr.	Escherichia coli	-	MIC	85.8	µg/mL	N	117	fever and gastric diseases					X	X
Cladanthus mixtus (L.) Chevall.	Cladanthus	mixtus (L.) Chevall.	Asteraceae	France (Corsica)	aerial part	Fr.	Klebsiella pneumoniae	-	MIC	85.8	µg/mL	N	117	fever and gastric diseases					X	X
Cladanthus mixtus (L.) Chevall.	Cladanthus	mixtus (L.) Chevall.	Asteraceae	France (Corsica)	aerial part	Fr.	Listeria monocytogenes	+	MIC	85.8	µg/mL	N	117	fever and gastric diseases					X	X
Cladanthus mixtus (L.) Chevall.	Cladanthus	mixtus (L.) Chevall.	Asteraceae	France (Corsica)	aerial part	Fr.	Staphylococcus aureus	+	MIC	85.8	µg/mL	N	117	fever and gastric diseases					X	X
Cladanthus mixtus (L.) Chevall.	Cladanthus	mixtus (L.) Chevall.	Asteraceae	France (Corsica)	aerial part	Fr.	Bacillus cereus	+	MIC	88.5	µg/mL	N	117	fever and gastric diseases					X	X
Cladanthus mixtus (L.) Chevall.	Cladanthus	mixtus (L.) Chevall.	Asteraceae	France (Corsica)	aerial part	EO	Citrobacter freundii	-	MIC	90	µg/mL	N	117	fever and gastric diseases					X	X
Cladanthus mixtus (L.) Chevall.	Cladanthus	mixtus (L.) Chevall.	Asteraceae	France (Corsica)	aerial part	EO	Enterococcus faecalis	+	MIC	90	µg/mL	N	117	fever and gastric diseases					X	X
Cladanthus mixtus (L.) Chevall.	Cladanthus	mixtus (L.) Chevall.	Asteraceae	France (Corsica)	aerial part	EO	Escherichia coli	-	MIC	90	µg/mL	N	117	fever and gastric diseases					X	X
Cladanthus mixtus (L.) Chevall.	Cladanthus	mixtus (L.) Chevall.	Asteraceae	France (Corsica)	aerial part	EO	Klebsiella pneumoniae	-	MIC	90	µg/mL	N	117	fever and gastric diseases					X	X
Cladanthus mixtus (L.) Chevall.	Cladanthus	mixtus (L.) Chevall.	Asteraceae	France (Corsica)	aerial part	EO	Listeria monocytogenes	+	MIC	90	µg/mL	N	117	fever and gastric diseases					X	X
Cladanthus mixtus (L.) Chevall.	Cladanthus	mixtus (L.) Chevall.	Asteraceae	France (Corsica)	aerial part	EO	Staphylococcus aureus	+	MIC	90	µg/mL	N	117	fever and gastric diseases					X	X
Cladanthus mixtus (L.) Chevall.	Cladanthus	mixtus (L.) Chevall.	Asteraceae	Morocco	leaf, stem	EO	Bacillus subtilis	+	MIC	20	μL/mL	N	352	NS	X
Cladanthus mixtus (L.) Chevall.	Cladanthus	mixtus (L.) Chevall.	Asteraceae	Morocco	leaf, stem	EO	Staphylococcus aureus	+	MIC	20	μL/mL	N	352	NS	X
Clausena anisata (Willd.) Hook.f. ex Benth.	Clausena	anisata (Willd.) Hook.f. ex Benth.	Rutaceae	Cameroon	root	CE	Providencia stuartii	-	MIC	128	µg/mL	N	429	fungal, bacterial and viral infections						X
Clausena anisata (Willd.) Hook.f. ex Benth.	Clausena	anisata (Willd.) Hook.f. ex Benth.	Rutaceae	Cameroon	root	CE	Enterobacter aerogenes	-	MIC	256	µg/mL	N	429	fungal, bacterial and viral infections						X
Clausena anisata (Willd.) Hook.f. ex Benth.	Clausena	anisata (Willd.) Hook.f. ex Benth.	Rutaceae	Cameroon	leaf	CE	Escherichia coli	-	MIC	256	µg/mL	N	429	fungal, bacterial and viral infections						X
Clausena anisata (Willd.) Hook.f. ex Benth.	Clausena	anisata (Willd.) Hook.f. ex Benth.	Rutaceae	Cameroon	root	CE	Escherichia coli	-	MIC	256	µg/mL	N	429	fungal, bacterial and viral infections						X
Clausena anisata (Willd.) Hook.f. ex Benth.	Clausena	anisata (Willd.) Hook.f. ex Benth.	Rutaceae	Cameroon	leaf	CE	Klebsiella pneumoniae	-	MIC	256	µg/mL	N	429	fungal, bacterial and viral infections						X
Clausena anisata (Willd.) Hook.f. ex Benth.	Clausena	anisata (Willd.) Hook.f. ex Benth.	Rutaceae	Cameroon	root	CE	Klebsiella pneumoniae	-	MIC	256	µg/mL	N	429	fungal, bacterial and viral infections						X
Clausena anisata (Willd.) Hook.f. ex Benth.	Clausena	anisata (Willd.) Hook.f. ex Benth.	Rutaceae	Cameroon	leaf	CE	Providencia stuartii	-	MIC	256	µg/mL	N	429	fungal, bacterial and viral infections						X
Cleistochlamys kirkii (Benth.) Oliv.	Cleistochlamys	kirkii (Benth.) Oliv.	Annonaceae	Mozambique	root bark	CM	Staphylococcus aureus	+	MIC	7.5	µg/mL	N	362	wound infections, tuberculosis, rheumatism						X			X
Cleistochlamys kirkii (Benth.) Oliv.	Cleistochlamys	kirkii (Benth.) Oliv.	Annonaceae	Mozambique	root bark	CDichl	Staphylococcus aureus	+	MIC	15	µg/mL	N	362	wound infections, tuberculosis, rheumatism						X			X
Cleistochlamys kirkii (Benth.) Oliv.	Cleistochlamys	kirkii (Benth.) Oliv.	Annonaceae	Mozambique	root bark	CM	Enterococcus faecalis	+	MIC	30	µg/mL	N	362	wound infections, tuberculosis, rheumatism						X			X
Cleistochlamys kirkii (Benth.) Oliv.	Cleistochlamys	kirkii (Benth.) Oliv.	Annonaceae	Mozambique	root bark	CEtOAc	Staphylococcus aureus	+	MIC	30	µg/mL	N	362	wound infections, tuberculosis, rheumatism						X			X
Cleistochlamys kirkii (Benth.) Oliv.	Cleistochlamys	kirkii (Benth.) Oliv.	Annonaceae	Mozambique	root bark	CEtOAc	Enterococcus faecalis	+	MIC	125	µg/mL	N	362	wound infections, tuberculosis, rheumatism						X			X
Cleistochlamys kirkii (Benth.) Oliv.	Cleistochlamys	kirkii (Benth.) Oliv.	Annonaceae	Mozambique	root bark	CDichl	Enterococcus faecalis	+	MIC	250	µg/mL	N	362	wound infections, tuberculosis, rheumatism						X			X
Cleistopholis patens (Benth.) Engl. & Diels	Cleistopholis	patens (Benth.) Engl. & Diels	Annonaceae	Cameroon	stem bark	CDichl	Mycobacterium smegmatis	+	MIC	125	µg/mL	N	444	Buruli ulcer, wound			X
Cleistopholis patens (Benth.) Engl. & Diels	Cleistopholis	patens (Benth.) Engl. & Diels	Annonaceae	Cameroon	twig	CE	Mycobacterium smegmatis	+	MIC	125	µg/mL	N	444	Buruli ulcer, wound			X
Cleistopholis patens (Benth.) Engl. & Diels	Cleistopholis	patens (Benth.) Engl. & Diels	Annonaceae	Cameroon	stem bark	CDichl	Mycobacterium ulcerans	+	MIC	125	µg/mL	N	444	Buruli ulcer, wound			X
Clematis vitalba L.	Clematis	vitalba L.	Ranunculaceae	Vietnam	stem	CM	Bacillus cereus	+	MIC	250	µg/mL	N	462	indigestion, diuretic, galactagogue				X	X		X
Clematis vitalba L.	Clematis	vitalba L.	Ranunculaceae	Vietnam	stem	CM	Bacillus subtilis	+	MIC	500	µg/mL	N	462	indigestion, diuretic, galactagogue				X	X		X
Clematis vitalba L.	Clematis	vitalba L.	Ranunculaceae	Vietnam	stem	CM	Staphylococcus aureus	+	MIC	500	µg/mL	N	462	indigestion, diuretic, galactagogue				X	X		X
Cleome spinosa Jacq.	Cleome	spinosa Jacq.	Cleomaceae	Brazil	root	CCyclo	Bacillus subtilis	+	MIC	90	µg/mL	N	111	asthma, cough, bronchitis, fever						X							X
Cleome spinosa Jacq.	Cleome	spinosa Jacq.	Cleomaceae	Brazil	root	CChl	Bacillus subtilis	+	MIC	90	µg/mL	N	111	asthma, cough, bronchitis, fever						X							X
Cleome spinosa Jacq.	Cleome	spinosa Jacq.	Cleomaceae	Brazil	leaf	CCyclo	Staphylococcus aureus	+	MIC	90	µg/mL	N	111	asthma, cough, bronchitis, fever						X							X
Cleome spinosa Jacq.	Cleome	spinosa Jacq.	Cleomaceae	Brazil	leaf	CCyclo	Bacillus subtilis	+	MIC	190	µg/mL	N	111	asthma, cough, bronchitis, fever						X							X
Cleome spinosa Jacq.	Cleome	spinosa Jacq.	Cleomaceae	Brazil	root	CCyclo	Micrococcus luteus	+	MIC	390	µg/mL	N	111	asthma, cough, bronchitis, fever						X							X
Cleome spinosa Jacq.	Cleome	spinosa Jacq.	Cleomaceae	Brazil	root	CChl	Micrococcus luteus	+	MIC	390	µg/mL	N	111	asthma, cough, bronchitis, fever						X							X
Cleome spinosa Jacq.	Cleome	spinosa Jacq.	Cleomaceae	Brazil	root	CM	Micrococcus luteus	+	MIC	390	µg/mL	N	111	asthma, cough, bronchitis, fever						X							X
Cleome viscosa L.	Cleome	viscosa L.	Cleomaceae	India	leaf	CM	Bacillus cereus	+	MIC	500	µg/mL	N	358	NS	X
Cleome viscosa L.	Cleome	viscosa L.	Cleomaceae	India	leaf	CM	Shigella flexneri	-	MIC	500	µg/mL	N	358	NS	X
Clerodendrum indicum (L.) Kuntze	Clerodendrum	indicum (L.) Kuntze	Lamiaceae	India	leaf	CM	Shigella flexneri	-	MIC	250	µg/mL	N	358	NS	X
Clerodendrum indicum (L.) Kuntze	Clerodendrum	indicum (L.) Kuntze	Lamiaceae	India	leaf	CM	Staphylococcus aureus	+	MIC	250	µg/mL	N	358	NS	X
Clerodendrum indicum (L.) Kuntze	Clerodendrum	indicum (L.) Kuntze	Lamiaceae	India	leaf	CM	Vibrio cholerae	-	MIC	500	µg/mL	N	358	NS	X
Clinopodium nepeta subsp. glandulosum (Req.) Govaerts	Clinopodium	nepeta subsp. glandulosum (Req.) Govaerts	Lamiaceae	Algeria	aerial part	EO	Enterococcus faecalis	+	MIC	0.07	μL/mL	N	74	NS	X
Clinopodium nepeta subsp. glandulosum (Req.) Govaerts	Clinopodium	nepeta subsp. glandulosum (Req.) Govaerts	Lamiaceae	Algeria	aerial part	EO	Klebsiella pneumoniae	-	MIC	0.07	μL/mL	N	74	NS	X
Clinopodium nepeta subsp. glandulosum (Req.) Govaerts	Clinopodium	nepeta subsp. glandulosum (Req.) Govaerts	Lamiaceae	Algeria	aerial part	EO	Salmonella enterica	-	MIC	0.15	μL/mL	N	74	NS	X
Clinopodium nepeta subsp. glandulosum (Req.) Govaerts	Clinopodium	nepeta subsp. glandulosum (Req.) Govaerts	Lamiaceae	Algeria	aerial part	EO	Listeria innocua	+	MIC	0.62	μL/mL	N	74	NS	X
Clinopodium nepeta subsp. glandulosum (Req.) Govaerts	Clinopodium	nepeta subsp. glandulosum (Req.) Govaerts	Lamiaceae	Algeria	aerial part	EO	Staphylococcus aureus (MSSA)	+	MIC	1.25	μL/mL	N	74	NS	X
Clinopodium nepeta subsp. glandulosum (Req.) Govaerts	Clinopodium	nepeta subsp. glandulosum (Req.) Govaerts	Lamiaceae	Algeria	aerial part	EO	Pseudomonas aeruginosa	-	MIC	5	μL/mL	N	74	NS	X
Clinopodium nepeta subsp. glandulosum (Req.) Govaerts	Clinopodium	nepeta subsp. glandulosum (Req.) Govaerts	Lamiaceae	Algeria	aerial part	EO	Staphylococcus aureus (MRSA)	+	MIC	10	μL/mL	N	74	NS	X
Clinopodium taxifolium (Kunth) Govaerts	Clinopodium	taxifolium (Kunth) Govaerts	Lamiaceae	Ecuador	aerial part	CM	Klebsiella pneumoniae	-	MIC	0.5	µg/mL	N	311	inflammations, flatulence, stomach pain, malaria and cough					X	X							X
Clinopodium taxifolium (Kunth) Govaerts	Clinopodium	taxifolium (Kunth) Govaerts	Lamiaceae	Ecuador	aerial part	CEtOAc	Pseudomonas aeruginosa	-	MIC	1	µg/mL	N	311	inflammations, flatulence, stomach pain, malaria and cough					X	X							X
Clinopodium taxifolium (Kunth) Govaerts	Clinopodium	taxifolium (Kunth) Govaerts	Lamiaceae	Ecuador	aerial part	EO	Escherichia coli	-	MIC	1.95	µg/mL	N	311	inflammations, flatulence, stomach pain, malaria and cough					X	X							X
Clinopodium taxifolium (Kunth) Govaerts	Clinopodium	taxifolium (Kunth) Govaerts	Lamiaceae	Ecuador	aerial part	EO	Micrococcus luteus	+	MIC	5	µg/mL	N	311	inflammations, flatulence, stomach pain, malaria and cough					X	X							X
Clinopodium taxifolium (Kunth) Govaerts	Clinopodium	taxifolium (Kunth) Govaerts	Lamiaceae	Ecuador	aerial part	EO	Staphylococcus aureus	+	MIC	5	µg/mL	N	311	inflammations, flatulence, stomach pain, malaria and cough					X	X							X
Clinopodium taxifolium (Kunth) Govaerts	Clinopodium	taxifolium (Kunth) Govaerts	Lamiaceae	Ecuador	aerial part	EO	Enterococcus faecalis	+	MIC	10	µg/mL	N	311	inflammations, flatulence, stomach pain, malaria and cough					X	X							X
Clinopodium taxifolium (Kunth) Govaerts	Clinopodium	taxifolium (Kunth) Govaerts	Lamiaceae	Ecuador	aerial part	EO	Proteus vulgaris	-	MIC	15.62	µg/mL	N	311	inflammations, flatulence, stomach pain, malaria and cough					X	X							X
Clinopodium taxifolium (Kunth) Govaerts	Clinopodium	taxifolium (Kunth) Govaerts	Lamiaceae	Ecuador	aerial part	EO	Pseudomonas aeruginosa	-	MIC	15.62	µg/mL	N	311	inflammations, flatulence, stomach pain, malaria and cough					X	X							X
Clinopodium taxifolium (Kunth) Govaerts	Clinopodium	taxifolium (Kunth) Govaerts	Lamiaceae	Ecuador	aerial part	CHex	Klebsiella pneumoniae	-	MIC	250	µg/mL	N	311	inflammations, flatulence, stomach pain, malaria and cough					X	X							X
Clinopodium vulgare L.	Clinopodium	vulgare L.	Lamiaceae	Iran	leaf	EO	Staphylococcus aureus	+	MIC	0.5	µg/mL	N	6	treatment against infectious disease						X
Clinopodium vulgare L.	Clinopodium	vulgare L.	Lamiaceae	Iran	leaf	EO	Streptococcus pneumoniae	+	MIC	1	µg/mL	N	6	treatment against infectious disease						X
Clinopodium vulgare L.	Clinopodium	vulgare L.	Lamiaceae	Iran	leaf	EO	Escherichia coli	-	MIC	2	µg/mL	N	6	treatment against infectious disease						X
Clinopodium vulgare L.	Clinopodium	vulgare L.	Lamiaceae	Iran	leaf	EO	Pseudomonas aeruginosa	-	MIC	2	µg/mL	N	6	treatment against infectious disease						X
Clinopodium vulgare L.	Clinopodium	vulgare L.	Lamiaceae	Iran	leaf	EO	Salmonella typhi	-	MIC	8	µg/mL	N	6	treatment against infectious disease						X
Clinopodium vulgare L.	Clinopodium	vulgare L.	Lamiaceae	Iran	leaf	EO	Klebsiella pneumoniae	-	MIC	16	µg/mL	N	6	treatment against infectious disease						X
Clinopodium vulgare L.	Clinopodium	vulgare L.	Lamiaceae	Iran	leaf	EO	Listeria monocytogenes	+	MIC	16	µg/mL	N	6	treatment against infectious disease						X
Clutia abyssinica Jaub. & Spach	Clutia	abyssinica Jaub. & Spach	Peraceae	Ethiopia	root	CE	Streptococcus pyogenes	+	MIC	256	µg/mL	N	272	bloody diarrhea, diarrhea, gastritis, constipation, skin infection			X		X
Cocos nucifera L.	Cocos	nucifera L.	Arecaceae	Nigeria (Osun)	seed husk	CHex	Enterococcus faecalis	+	MIC	160	µg/mL	N	14	diarrhea and diabetes				X	X
Cocos nucifera L.	Cocos	nucifera L.	Arecaceae	Nigeria (Osun)	seed husk	CEtOAc	Enterococcus faecalis	+	MIC	160	µg/mL	N	14	diarrhea and diabetes				X	X
Cocos nucifera L.	Cocos	nucifera L.	Arecaceae	Nigeria (Osun)	seed husk	CBuOH	Enterococcus faecalis	+	MIC	160	µg/mL	N	14	diarrhea and diabetes				X	X
Cocos nucifera L.	Cocos	nucifera L.	Arecaceae	Nigeria (Osun)	seed husk	CA	Enterococcus faecalis	+	MIC	160	µg/mL	N	14	diarrhea and diabetes				X	X
Cocos nucifera L.	Cocos	nucifera L.	Arecaceae	Nigeria (Osun)	leaf	CA	Enterococcus faecalis	+	MIC	390	µg/mL	N	14	diarrhea and diabetes				X	X
Coleus vettiveroides (Jacob) N.P.Singh & B.D.Sharma	Coleus	vettiveroides (Jacob) N.P.Singh & B.D.Sharma	Lamiaceae	India	root	EO	Staphylococcus aureus	+	MIC	40	µg/mL	N	394	hyperdipsia, burning sensation, strangury, leprosy, skin diseases, leucoderma, fever, vomiting, diarrhea and ulcers			X	X	X		X			X
Coleus vettiveroides (Jacob) N.P.Singh & B.D.Sharma	Coleus	vettiveroides (Jacob) N.P.Singh & B.D.Sharma	Lamiaceae	India	root	EO	Staphylococcus aureus (MSSA)	+	MIC	160	µg/mL	N	394	hyperdipsia, burning sensation, strangury, leprosy, skin diseases, leucoderma, fever, vomiting, diarrhea and ulcers			X	X	X		X			X
Coleus vettiveroides (Jacob) N.P.Singh & B.D.Sharma	Coleus	vettiveroides (Jacob) N.P.Singh & B.D.Sharma	Lamiaceae	India	root	EO	Klebsiella pneumoniae	-	MIC	320	µg/mL	N	394	hyperdipsia, burning sensation, strangury, leprosy, skin diseases, leucoderma, fever, vomiting, diarrhea and ulcers			X	X	X		X			X
Coleus vettiveroides (Jacob) N.P.Singh & B.D.Sharma	Coleus	vettiveroides (Jacob) N.P.Singh & B.D.Sharma	Lamiaceae	India	root	EO	Pseudomonas aeruginosa	-	MIC	320	µg/mL	N	394	hyperdipsia, burning sensation, strangury, leprosy, skin diseases, leucoderma, fever, vomiting, diarrhea and ulcers			X	X	X		X			X
Collaea argentina Griseb.	Collaea	argentina Griseb.	Fabaceae	Argentina	NS	CE	Staphylococcus aureus (MRSA)	+	MIC	500	µg/mL	N	91	NS	X
Colocasia esculenta (L.) Schott	Colocasia	esculenta (L.) Schott	Araceae	Cameroon	leaf	CM	Escherichia coli	-	MIC	256	µg/mL	N	141	NS	X
Colocasia esculenta (L.) Schott	Colocasia	esculenta (L.) Schott	Araceae	Cameroon	leaf	CM	Klebsiella pneumoniae	-	MIC	256	µg/mL	N	141	NS	X
Combretum album Pers.	Combretum	album Pers.	Combretaceae	India (West Bengal)	leaf	CE	Pseudomonas aeruginosa	-	MIC	5	µg/mL	N	81	diarrhea, inflammation, digestive disorder, diuretic problem, bilious haematuric malarial fever					X	X	X
Combretum album Pers.	Combretum	album Pers.	Combretaceae	India (West Bengal)	leaf	CE	Bacillus licheniformis	+	MIC	5	µg/mL	N	81	diarrhea, inflammation, digestive disorder, diuretic problem, bilious haematuric malarial fever					X	X	X
Combretum album Pers.	Combretum	album Pers.	Combretaceae	India (West Bengal)	leaf	CE	Pseudomonas putida	-	MIC	10	µg/mL	N	81	diarrhea, inflammation, digestive disorder, diuretic problem, bilious haematuric malarial fever					X	X	X
Combretum album Pers.	Combretum	album Pers.	Combretaceae	India (West Bengal)	leaf	CA	Pseudomonas aeruginosa	-	MIC	15	µg/mL	N	81	diarrhea, inflammation, digestive disorder, diuretic problem, bilious haematuric malarial fever					X	X	X
Combretum album Pers.	Combretum	album Pers.	Combretaceae	India (West Bengal)	leaf	CA	Bacillus licheniformis	+	MIC	15	µg/mL	N	81	diarrhea, inflammation, digestive disorder, diuretic problem, bilious haematuric malarial fever					X	X	X
Combretum album Pers.	Combretum	album Pers.	Combretaceae	India (West Bengal)	leaf	CE	Escherichia coli	-	MIC	15	µg/mL	N	81	diarrhea, inflammation, digestive disorder, diuretic problem, bilious haematuric malarial fever					X	X	X
Combretum album Pers.	Combretum	album Pers.	Combretaceae	India (West Bengal)	leaf	CE	Pseudomonas fluorescens	-	MIC	15	µg/mL	N	81	diarrhea, inflammation, digestive disorder, diuretic problem, bilious haematuric malarial fever					X	X	X
Combretum album Pers.	Combretum	album Pers.	Combretaceae	India (West Bengal)	leaf	CE	Bacillus subtilis	+	MIC	15	µg/mL	N	81	diarrhea, inflammation, digestive disorder, diuretic problem, bilious haematuric malarial fever					X	X	X
Combretum album Pers.	Combretum	album Pers.	Combretaceae	India (West Bengal)	leaf	CA	Pseudomonas putida	-	MIC	20	µg/mL	N	81	diarrhea, inflammation, digestive disorder, diuretic problem, bilious haematuric malarial fever					X	X	X
Combretum album Pers.	Combretum	album Pers.	Combretaceae	India (West Bengal)	leaf	CA	Escherichia coli	-	MIC	20	µg/mL	N	81	diarrhea, inflammation, digestive disorder, diuretic problem, bilious haematuric malarial fever					X	X	X
Combretum album Pers.	Combretum	album Pers.	Combretaceae	India (West Bengal)	leaf	CE	Bacillus mycoides	+	MIC	20	µg/mL	N	81	diarrhea, inflammation, digestive disorder, diuretic problem, bilious haematuric malarial fever					X	X	X
Combretum album Pers.	Combretum	album Pers.	Combretaceae	India (West Bengal)	leaf	CA	Bacillus mycoides	+	MIC	25	µg/mL	N	81	diarrhea, inflammation, digestive disorder, diuretic problem, bilious haematuric malarial fever					X	X	X
Combretum album Pers.	Combretum	album Pers.	Combretaceae	India (West Bengal)	leaf	CA	Pseudomonas fluorescens	-	MIC	25	µg/mL	N	81	diarrhea, inflammation, digestive disorder, diuretic problem, bilious haematuric malarial fever					X	X	X
Combretum album Pers.	Combretum	album Pers.	Combretaceae	India (West Bengal)	leaf	CA	Bacillus subtilis	+	MIC	25	µg/mL	N	81	diarrhea, inflammation, digestive disorder, diuretic problem, bilious haematuric malarial fever					X	X	X
Combretum apiculatum Sond.	Combretum	apiculatum Sond.	Combretaceae	Namibia	bark, root, leaf	CE	Escherichia coli	-	MIC	62.5	µg/mL	N	205	NS	X
Combretum apiculatum Sond.	Combretum	apiculatum Sond.	Combretaceae	Namibia	bark, root, leaf	CE	Staphylococcus aureus	+	MIC	250	µg/mL	N	205	NS	X
Combretum apiculatum Sond.	Combretum	apiculatum Sond.	Combretaceae	Namibia	bark, root, leaf	CE	Listeria monocytogenes	+	MIC	500	µg/mL	N	205	NS	X
Combretum comosum var. hispidum (M.A.Lawson) Jongkind	Combretum	comosum var. hispidum (M.A.Lawson) Jongkind	Combretaceae	Cameroon	leaf	CM	Enterobacter aerogenes	-	MIC	256	µg/mL	N	432	stomach aches, diarrhea, gastro-intestinal disorders, liver complaints, skin infections, urinary tract infections			X		X		X
Combretum edwardsii Exell	Combretum	edwardsii Exell	Combretaceae	South Africa	leaf	Fr.	Staphylococcus aureus	+	MIC	195	µg/mL	N	103	NS	X
Combretum edwardsii Exell	Combretum	edwardsii Exell	Combretaceae	South Africa	leaf	Fr.	Escherichia coli	-	MIC	390	µg/mL	N	103	NS	X
Combretum indicum (L.) DeFilipps	Combretum	indicum (L.) DeFilipps	Combretaceae	Thailand	flower	NS	Streptococcus pyogenes	+	MIC	250	µg/mL	N	264	NS	X
Combretum kraussii Hochst.	Combretum	kraussii Hochst.	Combretaceae	South Africa	leaf	Fr.	Staphylococcus aureus	+	MIC	390	µg/mL	N	103	antiseptic, wound, eye infections			X			X					X
Combretum micranthum G.Don	Combretum	micranthum G.Don	Combretaceae	Benin	leaf	CE	Clostridium difficile	+	MIC	18.7	µg/mL	N	52	antitumor, infected wounds, anti-inflammatory, indigestion, nausea			X		X	X
Combretum micranthum G.Don	Combretum	micranthum G.Don	Combretaceae	Benin	leaf	CE	Staphylococcus aureus (MSSA)	+	MIC	18.7	µg/mL	N	52	antitumor, infected wounds, anti-inflammatory, indigestion, nausea			X		X	X
Combretum micranthum G.Don	Combretum	micranthum G.Don	Combretaceae	Benin	leaf	CE	Staphylococcus xylosus	+	MIC	37.5	µg/mL	N	52	antitumor, infected wounds, anti-inflammatory, indigestion, nausea			X		X	X
Combretum micranthum G.Don	Combretum	micranthum G.Don	Combretaceae	Benin	leaf	CE	Clostridium difficile	+	MIC	156	µg/mL	N	52	antitumor, infected wounds, anti-inflammatory, indigestion, nausea			X		X	X
Combretum molle R.Br. ex G.Don	Combretum	molle R.Br. ex G.Don	Combretaceae	Cameroon	whole plant	CM	Enterobacter aerogenes	-	MIC	128	µg/mL	N	159	skin infections, gut, urogenital system, upper respiratory tract, gonorrhea, infections conditions, constipation, and dysentary			X		X	X	X	X					X
Combretum molle R.Br. ex G.Don	Combretum	molle R.Br. ex G.Don	Combretaceae	Cameroon	whole plant	CM	Escherichia coli	-	MIC	256	µg/mL	N	159	skin infections, gut, urogenital system, upper respiratory tract, gonorrhea, infections conditions, constipation, and dysentary			X		X	X	X	X					X
Combretum molle R.Br. ex G.Don	Combretum	molle R.Br. ex G.Don	Combretaceae	Cameroon	whole plant	CM	Klebsiella pneumoniae	-	MIC	256	µg/mL	N	159	skin infections, gut, urogenital system, upper respiratory tract, gonorrhea, infections conditions, constipation, and dysentary			X		X	X	X	X					X
Combretum vendae A.E.van Wyk	Combretum	vendae A.E.van Wyk	Combretaceae	South Africa	leaf	CDichl	Enterococcus faecalis	+	MIC	80	µg/mL	N	233	pneumonia, syphilis, colds, chest coughs, fever and mumps			X			X							X
Combretum vendae A.E.van Wyk	Combretum	vendae A.E.van Wyk	Combretaceae	South Africa	leaf	CAcet	Enterococcus faecalis	+	MIC	80	µg/mL	N	233	pneumonia, syphilis, colds, chest coughs, fever and mumps			X			X							X
Combretum vendae A.E.van Wyk	Combretum	vendae A.E.van Wyk	Combretaceae	South Africa	leaf	CDichl	Escherichia coli	-	MIC	80	µg/mL	N	233	pneumonia, syphilis, colds, chest coughs, fever and mumps			X			X							X
Combretum vendae A.E.van Wyk	Combretum	vendae A.E.van Wyk	Combretaceae	South Africa	leaf	CAcet	Staphylococcus aureus	+	MIC	80	µg/mL	N	233	pneumonia, syphilis, colds, chest coughs, fever and mumps			X			X							X
Combretum vendae A.E.van Wyk	Combretum	vendae A.E.van Wyk	Combretaceae	South Africa	leaf	CM	Escherichia coli	-	MIC	160	µg/mL	N	233	pneumonia, syphilis, colds, chest coughs, fever and mumps			X			X							X
Combretum vendae A.E.van Wyk	Combretum	vendae A.E.van Wyk	Combretaceae	South Africa	leaf	CDichl	Staphylococcus aureus	+	MIC	160	µg/mL	N	233	pneumonia, syphilis, colds, chest coughs, fever and mumps			X			X							X
Combretum vendae A.E.van Wyk	Combretum	vendae A.E.van Wyk	Combretaceae	South Africa	leaf	CChl	Enterococcus faecalis	+	MIC	320	µg/mL	N	233	pneumonia, syphilis, colds, chest coughs, fever and mumps			X			X							X
Combretum vendae A.E.van Wyk	Combretum	vendae A.E.van Wyk	Combretaceae	South Africa	leaf	CAcet	Escherichia coli	-	MIC	320	µg/mL	N	233	pneumonia, syphilis, colds, chest coughs, fever and mumps			X			X							X
Combretum vendae A.E.van Wyk	Combretum	vendae A.E.van Wyk	Combretaceae	South Africa	leaf	CChl	Escherichia coli	-	MIC	320	µg/mL	N	233	pneumonia, syphilis, colds, chest coughs, fever and mumps			X			X							X
Combretum vendae A.E.van Wyk	Combretum	vendae A.E.van Wyk	Combretaceae	South Africa	leaf	CChl	Staphylococcus aureus	+	MIC	320	µg/mL	N	233	pneumonia, syphilis, colds, chest coughs, fever and mumps			X			X							X
Combretum zeyheri Sond.	Combretum	zeyheri Sond.	Combretaceae	Zimbabwe	leaf	CE	Mycobacterium smegmatis	+	MIC	125	µg/mL	N	341	Tuberculosis associated symptoms: sore throats, fever, chest coughs						X							X
Commiphora gileadensis (L.) C.Chr.	Commiphora	gileadensis (L.) C.Chr.	Burseraceae	Saudi Arabia	stem	CM	Fusobacterium nucleatum	-	MIC	50	µg/mL	N	18	incense plant, antimycobacterial properties						X
Commiphora gileadensis (L.) C.Chr.	Commiphora	gileadensis (L.) C.Chr.	Burseraceae	Saudi Arabia	stem	CM	Lactobacillus casei	+	MIC	50	µg/mL	N	18	incense plant, antimycobacterial properties						X
Commiphora gileadensis (L.) C.Chr.	Commiphora	gileadensis (L.) C.Chr.	Burseraceae	Saudi Arabia	stem	CM	Staphylococcus aureus	+	MIC	50	µg/mL	N	18	incense plant, antimycobacterial properties						X
Commiphora gileadensis (L.) C.Chr.	Commiphora	gileadensis (L.) C.Chr.	Burseraceae	Saudi Arabia	stem	CM	Staphylococcus epidermidis	+	MIC	50	µg/mL	N	18	incense plant, antimycobacterial properties						X
Commiphora gileadensis (L.) C.Chr.	Commiphora	gileadensis (L.) C.Chr.	Burseraceae	Saudi Arabia	stem	CM	Streptococcus mutans	+	MIC	100	µg/mL	N	18	incense plant, antimycobacterial properties						X
Commiphora gileadensis (L.) C.Chr.	Commiphora	gileadensis (L.) C.Chr.	Burseraceae	Saudi Arabia	stem	CM	Streptococcus salivarius	+	MIC	100	µg/mL	N	18	incense plant, antimycobacterial properties						X
Commiphora leptophloeos (Mart.) J.B.Gillett	Commiphora	leptophloeos (Mart.) J.B.Gillett	Burseraceae	Brazil	stem bark	CM	Micrococcus luteus	+	MIC	97	µg/mL	N	128	infectious and inflammatory diseases						X
Commiphora leptophloeos (Mart.) J.B.Gillett	Commiphora	leptophloeos (Mart.) J.B.Gillett	Burseraceae	Brazil	stem bark	CChl	Micrococcus luteus	+	MIC	195	µg/mL	N	128	infectious and inflammatory diseases						X
Commiphora myrrha (Nees) Engl.	Commiphora	myrrha (Nees) Engl.	Burseraceae	Ethiopia	resin	EO	Bacillus cereus	+	MIC	400	µg/mL	Y	126	for infected teeth, intestinal worms, embalming, wounds, mouthwash for gingivitis and ulcers			X		X							X
Commiphora myrrha (Nees) Engl.	Commiphora	myrrha (Nees) Engl.	Burseraceae	Ethiopia	resin	EO	Pseudomonas aeruginosa	-	MIC	500	µg/mL	Y	126	for infected teeth, intestinal worms, embalming, wounds, mouthwash for gingivitis and ulcers			X		X							X
Commiphora myrrha (Nees) Engl.	Commiphora	myrrha (Nees) Engl.	Burseraceae	NS	branch, leaf	EO	Staphylococcus aureus	+	MIC	100	µg/mL	Y	440	NS	X
Commiphora myrrha (Nees) Engl.	Commiphora	myrrha (Nees) Engl.	Burseraceae	NS	oleogum	EO	Staphylococcus aureus	+	MIC	25	μL/mL	Y	447	NS	X
Commiphora myrrha (Nees) Engl.	Commiphora	myrrha (Nees) Engl.	Burseraceae	NS	oleogum	EO	Staphylococcus hyicus	+	MIC	25	μL/mL	Y	447	NS	X
Connarus favosus Planch.	Connarus	favosus Planch.	Connaraceae	Brazil	bark	CA	Pseudomonas fluorescens	-	MIC	15.6	µg/mL	N	112	snakebite			X
Connarus favosus Planch.	Connarus	favosus Planch.	Connaraceae	Brazil	bark	CA	Yersinia enterocolitica	-	MIC	15.6	µg/mL	N	112	snakebite			X
Connarus favosus Planch.	Connarus	favosus Planch.	Connaraceae	Brazil	bark	CA	Morganella morganii	-	MIC	250	µg/mL	N	112	snakebite			X
Connarus favosus Planch.	Connarus	favosus Planch.	Connaraceae	Brazil	bark	CA	Serratia marcescens	-	MIC	250	µg/mL	N	112	snakebite			X
Conostomium natalense (Hochst.) Bremek.	Conostomium	natalense (Hochst.) Bremek.	Rubiaceae	South Africa	leaf	CEtOAc	Enterococcus faecalis	+	MIC	90	µg/mL	N	346	diarrhea, emetics					X
Copaifera duckei Dwyer	Copaifera	duckei Dwyer	Fabaceae	Brazil	oleoresin	None	Staphylococcus aureus	+	MIC	25	µg/mL	N	457	NS	X
Copaifera duckei Dwyer	Copaifera	duckei Dwyer	Fabaceae	Brazil	oleoresin	None	Staphylococcus epidermidis	+	MIC	100	µg/mL	N	457	NS	X
Copaifera duckei Dwyer	Copaifera	duckei Dwyer	Fabaceae	Brazil	oleoresin	None	Escherichia coli	-	MIC	400	µg/mL	N	457	NS	X
Copaifera langsdorffii Desf.	Copaifera	langsdorffii Desf.	Fabaceae	Brazil	oleoresin	None	Listeria monocytogenes	+	MIC	400	µg/mL	N	163	NS	X
Copaifera oblongifolia Mart.	Copaifera	oblongifolia Mart.	Fabaceae	Brazil	oleoresin	None	Peptostreptococcus micros	+	MIC	25	µg/mL	N	110	anti-inflammatory, anticancer, antioxidant, anthelmintic, antimicrobial, antiulcer, antitetanus, urinary antiseptic			X		X	X			X
Copaifera oblongifolia Mart.	Copaifera	oblongifolia Mart.	Fabaceae	Brazil	oleoresin	None	Porphyromonas gingivalis	-	MIC	50	µg/mL	N	110	anti-inflammatory, anticancer, antioxidant, anthelmintic, antimicrobial, antiulcer, antitetanus, urinary antiseptic			X		X	X			X
Copaifera oblongifolia Mart.	Copaifera	oblongifolia Mart.	Fabaceae	Brazil	oleoresin	None	Streptococcus mitis	+	MIC	50	µg/mL	N	110	anti-inflammatory, anticancer, antioxidant, anthelmintic, antimicrobial, antiulcer, antitetanus, urinary antiseptic			X		X	X			X
Copaifera oblongifolia Mart.	Copaifera	oblongifolia Mart.	Fabaceae	Brazil	oleoresin	None	Aggregatibacter actinomycetemcomitans	-	MIC	100	µg/mL	N	110	anti-inflammatory, anticancer, antioxidant, anthelmintic, antimicrobial, antiulcer, antitetanus, urinary antiseptic			X		X	X			X
Copaifera oblongifolia Mart.	Copaifera	oblongifolia Mart.	Fabaceae	Brazil	oleoresin	None	Lactobacillus casei	+	MIC	100	µg/mL	N	110	anti-inflammatory, anticancer, antioxidant, anthelmintic, antimicrobial, antiulcer, antitetanus, urinary antiseptic			X		X	X			X
Copaifera oblongifolia Mart.	Copaifera	oblongifolia Mart.	Fabaceae	Brazil	oleoresin	None	Streptococcus mutans	+	MIC	100	µg/mL	N	110	anti-inflammatory, anticancer, antioxidant, anthelmintic, antimicrobial, antiulcer, antitetanus, urinary antiseptic			X		X	X			X
Copaifera oblongifolia Mart.	Copaifera	oblongifolia Mart.	Fabaceae	Brazil	oleoresin	None	Streptococcus salivarius	+	MIC	100	µg/mL	N	110	anti-inflammatory, anticancer, antioxidant, anthelmintic, antimicrobial, antiulcer, antitetanus, urinary antiseptic			X		X	X			X
Copaifera oblongifolia Mart.	Copaifera	oblongifolia Mart.	Fabaceae	Brazil	oleoresin	None	Streptococcus sanguinis	+	MIC	100	µg/mL	N	110	anti-inflammatory, anticancer, antioxidant, anthelmintic, antimicrobial, antiulcer, antitetanus, urinary antiseptic			X		X	X			X
Copaifera oblongifolia Mart.	Copaifera	oblongifolia Mart.	Fabaceae	Brazil	oleoresin	None	Streptococcus sobrinus	+	MIC	400	µg/mL	N	110	anti-inflammatory, anticancer, antioxidant, anthelmintic, antimicrobial, antiulcer, antitetanus, urinary antiseptic			X		X	X			X
Copaifera oblongifolia Mart.	Copaifera	oblongifolia Mart.	Fabaceae	Brazil	oleoresin	None	Escherichia coli	-	MIC	400	µg/mL	N	457	NS	X
Copaifera oblongifolia Mart.	Copaifera	oblongifolia Mart.	Fabaceae	Brazil	oleoresin	None	Staphylococcus aureus	+	MIC	400	µg/mL	N	457	NS	X
Copaifera paupera (Herzog) Dwyer	Copaifera	paupera (Herzog) Dwyer	Fabaceae	Brazil	oleoresin	None	Listeria monocytogenes	+	MIC	12.5	µg/mL	N	163	NS	X
Copaifera paupera (Herzog) Dwyer	Copaifera	paupera (Herzog) Dwyer	Fabaceae	Brazil	oleoresin	None	Bacillus cereus	+	MIC	100	µg/mL	N	163	NS	X
Copaifera paupera (Herzog) Dwyer	Copaifera	paupera (Herzog) Dwyer	Fabaceae	Brazil	oleoresin	None	Staphylococcus aureus	+	MIC	100	µg/mL	N	163	NS	X
Copaifera pubiflora Benth.	Copaifera	pubiflora Benth.	Fabaceae	Brazil	oleoresin	None	Listeria monocytogenes	+	MIC	12.5	µg/mL	N	163	NS	X
Copaifera pubiflora Benth.	Copaifera	pubiflora Benth.	Fabaceae	Brazil	oleoresin	None	Bacillus cereus	+	MIC	25	µg/mL	N	163	NS	X
Copaifera pubiflora Benth.	Copaifera	pubiflora Benth.	Fabaceae	Brazil	oleoresin	None	Staphylococcus aureus	+	MIC	50	µg/mL	N	163	NS	X
Copaifera reticulata Ducke	Copaifera	reticulata Ducke	Fabaceae	Brazil	oleoresin	None	Porphyromonas gingivalis	-	MIC	6.25	µg/mL	N	55	NS	X
Copaifera reticulata Ducke	Copaifera	reticulata Ducke	Fabaceae	Brazil	oleoresin	None	Streptococcus mitis	+	MIC	25	µg/mL	N	55	NS	X
Copaifera reticulata Ducke	Copaifera	reticulata Ducke	Fabaceae	Brazil	oleoresin	None	Streptococcus salivarius	+	MIC	25	µg/mL	N	55	NS	X
Copaifera reticulata Ducke	Copaifera	reticulata Ducke	Fabaceae	Brazil	oleoresin	None	Streptococcus sanguinis	+	MIC	25	µg/mL	N	55	NS	X
Copaifera reticulata Ducke	Copaifera	reticulata Ducke	Fabaceae	Brazil	oleoresin	None	Actinomyces naeslundii	+	MIC	50	µg/mL	N	55	NS	X
Copaifera reticulata Ducke	Copaifera	reticulata Ducke	Fabaceae	Brazil	oleoresin	None	Fusobacterium nucleatum	-	MIC	50	µg/mL	N	55	NS	X
Copaifera reticulata Ducke	Copaifera	reticulata Ducke	Fabaceae	Brazil	oleoresin	None	Prevotella nigrescens	-	MIC	50	µg/mL	N	55	NS	X
Copaifera reticulata Ducke	Copaifera	reticulata Ducke	Fabaceae	Brazil	oleoresin	None	Streptococcus mutans	+	MIC	50	µg/mL	N	55	NS	X
Copaifera reticulata Ducke	Copaifera	reticulata Ducke	Fabaceae	Brazil	oleoresin	None	Streptococcus sobrinus	+	MIC	50	µg/mL	N	55	NS	X
Copaifera reticulata Ducke	Copaifera	reticulata Ducke	Fabaceae	Brazil	oleoresin	None	Enterococcus faecalis	+	MIC	100	µg/mL	N	55	NS	X
Copaifera reticulata Ducke	Copaifera	reticulata Ducke	Fabaceae	Brazil	oleoresin	None	Listeria monocytogenes	+	MIC	25	µg/mL	N	163	NS	X
Copaifera reticulata Ducke	Copaifera	reticulata Ducke	Fabaceae	Brazil	oleoresin	None	Bacillus cereus	+	MIC	100	µg/mL	N	163	NS	X
Copaifera reticulata Ducke	Copaifera	reticulata Ducke	Fabaceae	Brazil	oleoresin	None	Staphylococcus aureus	+	MIC	100	µg/mL	N	163	NS	X
Copaifera reticulata Ducke	Copaifera	reticulata Ducke	Fabaceae	Brazil	oleoresin	None	Staphylococcus aureus	+	MIC	50	µg/mL	N	457	NS	X
Copaifera reticulata Ducke	Copaifera	reticulata Ducke	Fabaceae	Brazil	oleoresin	None	Staphylococcus epidermidis	+	MIC	100	µg/mL	N	457	NS	X
Cordia curassavica (Jacq.) Roem. & Schult.	Cordia	curassavica (Jacq.) Roem. & Schult.	Boraginaceae	Brazil	leaf	CHex	Staphylococcus aureus	+	MIC	250	µg/mL	N	290	topical anti-inflammatory						X
Cordia curassavica (Jacq.) Roem. & Schult.	Cordia	curassavica (Jacq.) Roem. & Schult.	Boraginaceae	Brazil	leaf	Fr.	Escherichia coli	-	MIC	256	µg/mL	N	291	NS	X
Cordia curassavica (Jacq.) Roem. & Schult.	Cordia	curassavica (Jacq.) Roem. & Schult.	Boraginaceae	Brazil	leaf	Fr.	Pseudomonas aeruginosa	-	MIC	256	µg/mL	N	291	NS	X
Cordia curassavica (Jacq.) Roem. & Schult.	Cordia	curassavica (Jacq.) Roem. & Schult.	Boraginaceae	Brazil	leaf	Fr.	Staphylococcus aureus	+	MIC	256	µg/mL	N	291	NS	X
Coriandrum sativum L.	Coriandrum	sativum L.	Apiaceae	Brazil	leaf	EO	Fusobacterium nucleatum	-	MIC	15	µg/mL	N	66	antimicrobial activity against oral biofilms												X
Coriandrum sativum L.	Coriandrum	sativum L.	Apiaceae	Brazil	leaf	EO	Streptococcus mitis	+	MIC	62	µg/mL	N	66	antimicrobial activity against oral biofilms												X
Coriandrum sativum L.	Coriandrum	sativum L.	Apiaceae	Brazil	leaf	EO	Porphyromonas gingivalis	-	MIC	125	µg/mL	N	66	antimicrobial activity against oral biofilms												X
Coriandrum sativum L.	Coriandrum	sativum L.	Apiaceae	Brazil	leaf	EO	Streptococcus sanguinis	+	MIC	250	µg/mL	N	66	antimicrobial activity against oral biofilms												X
Coriandrum sativum L.	Coriandrum	sativum L.	Apiaceae	Croatia	NS	EO	Escherichia coli	-	MIC	0.4	μL/mL	Y	72	carminative, spasmolytic, digestive, antimicrobial					X	X			X
Coriandrum sativum L.	Coriandrum	sativum L.	Apiaceae	Croatia	NS	EO	Staphylococcus aureus	+	MIC	2.8	μL/mL	Y	72	carminative, spasmolytic, digestive, antimicrobial					X	X			X
Coriandrum sativum L.	Coriandrum	sativum L.	Apiaceae	Croatia	NS	EO	Proteus mirabilis	-	MIC	11.4	μL/mL	Y	72	carminative, spasmolytic, digestive, antimicrobial					X	X			X
Coriandrum sativum L.	Coriandrum	sativum L.	Apiaceae	Pakistan	stem bark	CE	Staphylococcus aureus (VRSA)	+	MIC	128	µg/mL	Y	262	NS	X
Coriandrum sativum L.	Coriandrum	sativum L.	Apiaceae	Thailand	fruit	NS	Streptococcus pyogenes	+	MIC	62.5	µg/mL	N	264	NS	X
Coriandrum sativum L.	Coriandrum	sativum L.	Apiaceae	India	seed	CM	Bacillus subtilis	+	MIC	62.5	µg/mL	Y	439	fertility, alcohol dependency, brain tumors, GI secretion, sedative, carminative					X	X		X		X
Coriandrum sativum L.	Coriandrum	sativum L.	Apiaceae	India	seed	CAcet	Escherichia coli	-	MIC	62.5	µg/mL	Y	439	fertility, alcohol dependency, brain tumors, GI secretion, sedative, carminative					X	X		X		X
Coriandrum sativum L.	Coriandrum	sativum L.	Apiaceae	India	seed	CM	Proteus mirabilis	-	MIC	62.5	µg/mL	Y	439	fertility, alcohol dependency, brain tumors, GI secretion, sedative, carminative					X	X		X		X
Coriandrum sativum L.	Coriandrum	sativum L.	Apiaceae	India	seed	CM	Staphylococcus aureus	+	MIC	62.5	µg/mL	Y	439	fertility, alcohol dependency, brain tumors, GI secretion, sedative, carminative					X	X		X		X
Coriandrum sativum L.	Coriandrum	sativum L.	Apiaceae	India	seed	CAcet	Staphylococcus aureus	+	MIC	62.5	µg/mL	Y	439	fertility, alcohol dependency, brain tumors, GI secretion, sedative, carminative					X	X		X		X
Coriandrum sativum L.	Coriandrum	sativum L.	Apiaceae	India	seed	CAcet	Bacillus subtilis	+	MIC	125	µg/mL	Y	439	fertility, alcohol dependency, brain tumors, GI secretion, sedative, carminative					X	X		X		X
Coriandrum sativum L.	Coriandrum	sativum L.	Apiaceae	India	seed	CA	Bacillus subtilis	+	MIC	125	µg/mL	Y	439	fertility, alcohol dependency, brain tumors, GI secretion, sedative, carminative					X	X		X		X
Coriandrum sativum L.	Coriandrum	sativum L.	Apiaceae	India	seed	CM	Escherichia coli	-	MIC	125	µg/mL	Y	439	fertility, alcohol dependency, brain tumors, GI secretion, sedative, carminative					X	X		X		X
Coriandrum sativum L.	Coriandrum	sativum L.	Apiaceae	India	seed	CE	Escherichia coli	-	MIC	125	µg/mL	Y	439	fertility, alcohol dependency, brain tumors, GI secretion, sedative, carminative					X	X		X		X
Coriandrum sativum L.	Coriandrum	sativum L.	Apiaceae	India	seed	CA	Escherichia coli	-	MIC	125	µg/mL	Y	439	fertility, alcohol dependency, brain tumors, GI secretion, sedative, carminative					X	X		X		X
Coriandrum sativum L.	Coriandrum	sativum L.	Apiaceae	India	seed	CM	Klebsiella pneumoniae	-	MIC	125	µg/mL	Y	439	fertility, alcohol dependency, brain tumors, GI secretion, sedative, carminative					X	X		X		X
Coriandrum sativum L.	Coriandrum	sativum L.	Apiaceae	India	seed	CE	Klebsiella pneumoniae	-	MIC	125	µg/mL	Y	439	fertility, alcohol dependency, brain tumors, GI secretion, sedative, carminative					X	X		X		X
Coriandrum sativum L.	Coriandrum	sativum L.	Apiaceae	India	seed	CAcet	Klebsiella pneumoniae	-	MIC	125	µg/mL	Y	439	fertility, alcohol dependency, brain tumors, GI secretion, sedative, carminative					X	X		X		X
Coriandrum sativum L.	Coriandrum	sativum L.	Apiaceae	India	seed	CAcet	Proteus mirabilis	-	MIC	125	µg/mL	Y	439	fertility, alcohol dependency, brain tumors, GI secretion, sedative, carminative					X	X		X		X
Coriandrum sativum L.	Coriandrum	sativum L.	Apiaceae	India	seed	CM	Pseudomonas aeruginosa	-	MIC	125	µg/mL	Y	439	fertility, alcohol dependency, brain tumors, GI secretion, sedative, carminative					X	X		X		X
Coriandrum sativum L.	Coriandrum	sativum L.	Apiaceae	India	seed	CA	Pseudomonas aeruginosa	-	MIC	125	µg/mL	Y	439	fertility, alcohol dependency, brain tumors, GI secretion, sedative, carminative					X	X		X		X
Coriandrum sativum L.	Coriandrum	sativum L.	Apiaceae	India	seed	CM	Salmonella typhi	-	MIC	125	µg/mL	Y	439	fertility, alcohol dependency, brain tumors, GI secretion, sedative, carminative					X	X		X		X
Coriandrum sativum L.	Coriandrum	sativum L.	Apiaceae	India	seed	CE	Salmonella typhi	-	MIC	125	µg/mL	Y	439	fertility, alcohol dependency, brain tumors, GI secretion, sedative, carminative					X	X		X		X
Coriandrum sativum L.	Coriandrum	sativum L.	Apiaceae	India	seed	CAcet	Salmonella typhi	-	MIC	125	µg/mL	Y	439	fertility, alcohol dependency, brain tumors, GI secretion, sedative, carminative					X	X		X		X
Coriandrum sativum L.	Coriandrum	sativum L.	Apiaceae	India	seed	CE	Bacillus subtilis	+	MIC	250	µg/mL	Y	439	fertility, alcohol dependency, brain tumors, GI secretion, sedative, carminative					X	X		X		X
Coriandrum sativum L.	Coriandrum	sativum L.	Apiaceae	India	seed	CEtOAc	Bacillus subtilis	+	MIC	250	µg/mL	Y	439	fertility, alcohol dependency, brain tumors, GI secretion, sedative, carminative					X	X		X		X
Coriandrum sativum L.	Coriandrum	sativum L.	Apiaceae	India	seed	CEtOAc	Escherichia coli	-	MIC	250	µg/mL	Y	439	fertility, alcohol dependency, brain tumors, GI secretion, sedative, carminative					X	X		X		X
Coriandrum sativum L.	Coriandrum	sativum L.	Apiaceae	India	seed	CEtOAc	Klebsiella pneumoniae	-	MIC	250	µg/mL	Y	439	fertility, alcohol dependency, brain tumors, GI secretion, sedative, carminative					X	X		X		X
Coriandrum sativum L.	Coriandrum	sativum L.	Apiaceae	India	seed	CA	Klebsiella pneumoniae	-	MIC	250	µg/mL	Y	439	fertility, alcohol dependency, brain tumors, GI secretion, sedative, carminative					X	X		X		X
Coriandrum sativum L.	Coriandrum	sativum L.	Apiaceae	India	seed	CE	Proteus mirabilis	-	MIC	250	µg/mL	Y	439	fertility, alcohol dependency, brain tumors, GI secretion, sedative, carminative					X	X		X		X
Coriandrum sativum L.	Coriandrum	sativum L.	Apiaceae	India	seed	CEtOAc	Proteus mirabilis	-	MIC	250	µg/mL	Y	439	fertility, alcohol dependency, brain tumors, GI secretion, sedative, carminative					X	X		X		X
Coriandrum sativum L.	Coriandrum	sativum L.	Apiaceae	India	seed	CA	Proteus mirabilis	-	MIC	250	µg/mL	Y	439	fertility, alcohol dependency, brain tumors, GI secretion, sedative, carminative					X	X		X		X
Coriandrum sativum L.	Coriandrum	sativum L.	Apiaceae	India	seed	CAcet	Pseudomonas aeruginosa	-	MIC	250	µg/mL	Y	439	fertility, alcohol dependency, brain tumors, GI secretion, sedative, carminative					X	X		X		X
Coriandrum sativum L.	Coriandrum	sativum L.	Apiaceae	India	seed	CE	Pseudomonas aeruginosa	-	MIC	250	µg/mL	Y	439	fertility, alcohol dependency, brain tumors, GI secretion, sedative, carminative					X	X		X		X
Coriandrum sativum L.	Coriandrum	sativum L.	Apiaceae	India	seed	CEtOAc	Pseudomonas aeruginosa	-	MIC	250	µg/mL	Y	439	fertility, alcohol dependency, brain tumors, GI secretion, sedative, carminative					X	X		X		X
Coriandrum sativum L.	Coriandrum	sativum L.	Apiaceae	India	seed	CEtOAc	Salmonella typhi	-	MIC	250	µg/mL	Y	439	fertility, alcohol dependency, brain tumors, GI secretion, sedative, carminative					X	X		X		X
Coriandrum sativum L.	Coriandrum	sativum L.	Apiaceae	India	seed	CA	Salmonella typhi	-	MIC	250	µg/mL	Y	439	fertility, alcohol dependency, brain tumors, GI secretion, sedative, carminative					X	X		X		X
Coriandrum sativum L.	Coriandrum	sativum L.	Apiaceae	India	seed	CE	Staphylococcus aureus	+	MIC	250	µg/mL	Y	439	fertility, alcohol dependency, brain tumors, GI secretion, sedative, carminative					X	X		X		X
Coriandrum sativum L.	Coriandrum	sativum L.	Apiaceae	India	seed	CEtOAc	Staphylococcus aureus	+	MIC	250	µg/mL	Y	439	fertility, alcohol dependency, brain tumors, GI secretion, sedative, carminative					X	X		X		X
Coriandrum sativum L.	Coriandrum	sativum L.	Apiaceae	India	seed	CA	Staphylococcus aureus	+	MIC	250	µg/mL	Y	439	fertility, alcohol dependency, brain tumors, GI secretion, sedative, carminative					X	X		X		X
Coriandrum sativum L.	Coriandrum	sativum L.	Apiaceae	Croatia	seed	EO	Staphylococcus aureus	+	MIC	6.25	μL/mL	Y	447	carminative, spasmolytic, digestive, antimicrobial					X	X			X
Coriandrum sativum L.	Coriandrum	sativum L.	Apiaceae	Croatia	seed	EO	Staphylococcus hyicus	+	MIC	6.25	μL/mL	Y	447	carminative, spasmolytic, digestive, antimicrobial					X	X			X
Corymbia citriodora (Hook.) K.D.Hill & L.A.S.Johnson	Corymbia	citriodora (Hook.) K.D.Hill & L.A.S.Johnson	Myrtaceae	Egypt	leaf	EO	Escherichia coli	-	MIC	60	µg/mL	N	389	anti-inflammatory, analgesic, respiratory infections						X				X			X
Corymbia citriodora (Hook.) K.D.Hill & L.A.S.Johnson	Corymbia	citriodora (Hook.) K.D.Hill & L.A.S.Johnson	Myrtaceae	Egypt	leaf	EO	Bacillus cereus	+	MIC	80	µg/mL	N	389	anti-inflammatory, analgesic, respiratory infections						X				X			X
Corymbia citriodora (Hook.) K.D.Hill & L.A.S.Johnson	Corymbia	citriodora (Hook.) K.D.Hill & L.A.S.Johnson	Myrtaceae	Egypt	leaf	EO	Pectobacterium carotovorum	-	MIC	160	µg/mL	N	389	anti-inflammatory, analgesic, respiratory infections						X				X			X
Corymbia citriodora (Hook.) K.D.Hill & L.A.S.Johnson	Corymbia	citriodora (Hook.) K.D.Hill & L.A.S.Johnson	Myrtaceae	Egypt	leaf	EO	Pectobacterium atrosepticum	-	MIC	170	µg/mL	N	389	anti-inflammatory, analgesic, respiratory infections						X				X			X
Corymbia citriodora (Hook.) K.D.Hill & L.A.S.Johnson	Corymbia	citriodora (Hook.) K.D.Hill & L.A.S.Johnson	Myrtaceae	Egypt	leaf	EO	Staphylococcus aureus	+	MIC	200	µg/mL	N	389	anti-inflammatory, analgesic, respiratory infections						X				X			X
Corymbia torelliana (F.Muell.) K.D.Hill & L.A.S.Johnson	Corymbia	torelliana (F.Muell.) K.D.Hill & L.A.S.Johnson	Myrtaceae	Nigeria	leaf	CHex	Mycobacterium tuberculosis	+	MIC	8	µg/mL	N	254	cold, cough, influenza, toothache, fever, sore throat, infections						X						X	X
Corymbia torelliana (F.Muell.) K.D.Hill & L.A.S.Johnson	Corymbia	torelliana (F.Muell.) K.D.Hill & L.A.S.Johnson	Myrtaceae	Nigeria	stem bark	CChl	Mycobacterium tuberculosis	+	MIC	18.8	µg/mL	N	254	cold, cough, influenza, toothache, fever, sore throat, infections						X						X	X
Corymbia torelliana (F.Muell.) K.D.Hill & L.A.S.Johnson	Corymbia	torelliana (F.Muell.) K.D.Hill & L.A.S.Johnson	Myrtaceae	Nigeria	leaf	CChl	Mycobacterium tuberculosis	+	MIC	28.2	µg/mL	N	254	cold, cough, influenza, toothache, fever, sore throat, infections						X						X	X
Corymbia torelliana (F.Muell.) K.D.Hill & L.A.S.Johnson	Corymbia	torelliana (F.Muell.) K.D.Hill & L.A.S.Johnson	Myrtaceae	Nigeria	stem bark	CHex	Mycobacterium tuberculosis	+	MIC	29.9	µg/mL	N	254	cold, cough, influenza, toothache, fever, sore throat, infections						X						X	X
Cota altissima (L.) J.Gay.	Cota	altissima (L.) J.Gay.	Asteraceae	Iran	aerial part	EO	Bacillus subtilis	+	MIC	3.13	μL/mL	N	391	NS	X
Cota altissima (L.) J.Gay.	Cota	altissima (L.) J.Gay.	Asteraceae	Iran	aerial part	EO	Pseudomonas aeruginosa	-	MIC	3.13	μL/mL	N	391	NS	X
Cota altissima (L.) J.Gay.	Cota	altissima (L.) J.Gay.	Asteraceae	Iran	aerial part	EO	Staphylococcus aureus	+	MIC	3.13	μL/mL	N	391	NS	X
Cota altissima (L.) J.Gay.	Cota	altissima (L.) J.Gay.	Asteraceae	Iran	aerial part	EO	Staphylococcus epidermidis	+	MIC	3.13	μL/mL	N	391	NS	X
Cota altissima (L.) J.Gay.	Cota	altissima (L.) J.Gay.	Asteraceae	Iran	aerial part	EO	Escherichia coli	-	MIC	6.25	μL/mL	N	391	NS	X
Cota altissima (L.) J.Gay.	Cota	altissima (L.) J.Gay.	Asteraceae	Iran	aerial part	EO	Klebsiella pneumoniae	-	MIC	6.25	μL/mL	N	391	NS	X
Cota palaestina Reut. ex Unger & Kotschy	Cota	palaestina Reut. ex Unger & Kotschy	Asteraceae	Jordan	flower	EO	Staphylococcus epidermidis	+	MIC	6	µg/mL	N	57	anti-inflammatory, antioxidant, antibacterial, antispasmodic					X				X
Cota palaestina Reut. ex Unger & Kotschy	Cota	palaestina Reut. ex Unger & Kotschy	Asteraceae	Jordan	flower	EO	Staphylococcus aureus	+	MIC	10	µg/mL	N	57	anti-inflammatory, antioxidant, antibacterial, antispasmodic					X				X
Cota palaestina Reut. ex Unger & Kotschy	Cota	palaestina Reut. ex Unger & Kotschy	Asteraceae	Jordan	flower	EO	Bacillus subtilis	+	MIC	25	µg/mL	N	57	anti-inflammatory, antioxidant, antibacterial, antispasmodic					X				X
Cota palaestina Reut. ex Unger & Kotschy	Cota	palaestina Reut. ex Unger & Kotschy	Asteraceae	Jordan	flower	EO	Escherichia coli	-	MIC	53	µg/mL	N	57	anti-inflammatory, antioxidant, antibacterial, antispasmodic					X				X
Cota palaestina Reut. ex Unger & Kotschy	Cota	palaestina Reut. ex Unger & Kotschy	Asteraceae	Jordan	flower	EO	Pseudomonas aeruginosa	-	MIC	75	µg/mL	N	57	anti-inflammatory, antioxidant, antibacterial, antispasmodic					X				X
Cotinus coggygria Scop.	Cotinus	coggygria Scop.	Anacardiaceae	Bulgaria	leaf	CM	Staphylococcus aureus (MRSA)	+	MIC	156	µg/mL	N	373	anti-inflammatory, antimicrobial, wound-healing, hepatobiliary disorders, hepatitis, fever reduction			X		X	X
Cotinus coggygria Scop.	Cotinus	coggygria Scop.	Anacardiaceae	Bulgaria	leaf	CM	Staphylococcus aureus (MSSA)	+	MIC	156	µg/mL	N	373	anti-inflammatory, antimicrobial, wound-healing, hepatobiliary disorders, hepatitis, fever reduction			X		X	X
Cotinus coggygria Scop.	Cotinus	coggygria Scop.	Anacardiaceae	Bulgaria	leaf	CM	Staphylococcus aureus	+	MIC	313	µg/mL	N	373	anti-inflammatory, antimicrobial, wound-healing, hepatobiliary disorders, hepatitis, fever reduction			X		X	X
Cotyledon orbiculata L.	Cotyledon	orbiculata L.	Crassulaceae	South Africa	leaf	CDichl	Cutibacterium acnes	+	MIC	250	µg/mL	N	273	wart removal						X
Cotyledon orbiculata L.	Cotyledon	orbiculata L.	Crassulaceae	South Africa	leaf	CDichl	Staphylococcus epidermidis	+	MIC	380	µg/mL	N	273	wart removal			X
Cotyledon orbiculata L.	Cotyledon	orbiculata L.	Crassulaceae	South Africa	leaf	CDichl	Pseudomonas aeruginosa	-	MIC	500	µg/mL	N	273	wart removal			X
Coula edulis Baill.	Coula	edulis Baill.	Olacaceae	Cameroon	fruit	CM	Escherichia coli	-	MIC	32	µg/mL	N	142	dysentery, stimulate appetite, counteract anemia		X		X	X
Coula edulis Baill.	Coula	edulis Baill.	Olacaceae	Cameroon	fruit	CM	Klebsiella pneumoniae	-	MIC	32	µg/mL	N	142	dysentery, stimulate appetite, counteract anemia		X		X	X
Coula edulis Baill.	Coula	edulis Baill.	Olacaceae	Cameroon	fruit	CM	Enterobacter aerogenes	-	MIC	64	µg/mL	N	142	dysentery, stimulate appetite, counteract anemia		X		X	X
Coula edulis Baill.	Coula	edulis Baill.	Olacaceae	Cameroon	fruit	CM	Providencia stuartii	-	MIC	128	µg/mL	N	142	dysentery, stimulate appetite, counteract anemia		X		X	X
Crassula multicava Lem.	Crassula	multicava Lem.	Crassulaceae	South Africa	whole plant	CEtOAc	Enterococcus faecalis	+	MIC	90	µg/mL	N	346	emetic					X
Cratoxylum formosum subsp. pruniflorum (Kurz) Gogelein	Cratoxylum	formosum subsp. pruniflorum (Kurz) Gogelein	Hypericaceae	Vietnam	leaf	CM	Bacillus cereus	+	MIC	125	µg/mL	N	462	digestive aid					X
Cratoxylum formosum subsp. pruniflorum (Kurz) Gogelein	Cratoxylum	formosum subsp. pruniflorum (Kurz) Gogelein	Hypericaceae	Vietnam	leaf	CM	Bacillus subtilis	+	MIC	125	µg/mL	N	462	digestive aid					X
Cratoxylum formosum subsp. pruniflorum (Kurz) Gogelein	Cratoxylum	formosum subsp. pruniflorum (Kurz) Gogelein	Hypericaceae	Vietnam	leaf	CM	Staphylococcus aureus	+	MIC	125	µg/mL	N	462	digestive aid					X
Cremaspora triflora (Thonn.) K.Schum.	Cremaspora	triflora (Thonn.) K.Schum.	Rubiaceae	South Africa	leaf	CAcet	Mycobacterium aurum	+	MIC	156	µg/mL	N	36	NS	X
Cremaspora triflora (Thonn.) K.Schum.	Cremaspora	triflora (Thonn.) K.Schum.	Rubiaceae	South Africa	leaf	CAcet	Mycobacterium tuberculosis	+	MIC	160	µg/mL	N	36	NS	X
Cremaspora triflora (Thonn.) K.Schum.	Cremaspora	triflora (Thonn.) K.Schum.	Rubiaceae	South Africa	leaf	CAcet	Mycobacterium bovis	+	MIC	190	µg/mL	N	36	NS	X
Cremaspora triflora (Thonn.) K.Schum.	Cremaspora	triflora (Thonn.) K.Schum.	Rubiaceae	South Africa	leaf	CAcet	Mycobacterium smegmatis	+	MIC	312	µg/mL	N	36	NS	X
Cremaspora triflora (Thonn.) K.Schum.	Cremaspora	triflora (Thonn.) K.Schum.	Rubiaceae	South Africa	leaf	CAcet	Mycobacterium tuberculosis	+	MIC	78	µg/mL	N	37	NS	X
Cremaspora triflora (Thonn.) K.Schum.	Cremaspora	triflora (Thonn.) K.Schum.	Rubiaceae	South Africa	leaf	CAcet	Mycobacterium aurum	+	MIC	100	µg/mL	N	37	NS	X
Cremaspora triflora (Thonn.) K.Schum.	Cremaspora	triflora (Thonn.) K.Schum.	Rubiaceae	South Africa	leaf	CAcet	Mycobacterium smegmatis	+	MIC	230	µg/mL	N	37	NS	X
Cremaspora triflora (Thonn.) K.Schum.	Cremaspora	triflora (Thonn.) K.Schum.	Rubiaceae	South Africa	leaf	CA	Mycobacterium fortuitum	+	MIC	20	µg/mL	N	149	NS	X
Cremaspora triflora (Thonn.) K.Schum.	Cremaspora	triflora (Thonn.) K.Schum.	Rubiaceae	South Africa	leaf	CA	Mycobacterium smegmatis	+	MIC	40	µg/mL	N	149	NS	X
Cremaspora triflora (Thonn.) K.Schum.	Cremaspora	triflora (Thonn.) K.Schum.	Rubiaceae	South Africa	leaf	CA	Mycobacterium aurum	+	MIC	80	µg/mL	N	149	NS	X
Crinum angustum Steud.	Crinum	angustum Steud.	Amaryllidaceae	Italy	whole plant	CM	Staphylococcus aureus (MRSA)	+	IC50	78	µg/mL	N	203	NS	X
Crinum purpurascens Herb.	Crinum	purpurascens Herb.	Amaryllidaceae	Cameroon	leaf	CM	Escherichia coli	-	MIC	128	µg/mL	N	461	antibacterial						X
Crinum purpurascens Herb.	Crinum	purpurascens Herb.	Amaryllidaceae	Cameroon	leaf	CM	Staphylococcus aureus	+	MIC	128	µg/mL	N	461	antibacterial						X
Crinum purpurascens Herb.	Crinum	purpurascens Herb.	Amaryllidaceae	Cameroon	leaf	CM	Enterobacter aerogenes	-	MIC	256	µg/mL	N	461	antibacterial						X
Crinum purpurascens Herb.	Crinum	purpurascens Herb.	Amaryllidaceae	Cameroon	leaf	CM	Klebsiella pneumoniae	-	MIC	256	µg/mL	N	461	antibacterial						X
Croton bonplandianus Baill.	Croton	bonplandianus Baill.	Euphorbiaceae	India	aerial part	CA	Bacillus subtilis	+	MIC	128	µg/mL	N	418	high blood pressure, treatment of skin diseases, antiseptic, antidote		X	X			X
Croton bonplandianus Baill.	Croton	bonplandianus Baill.	Euphorbiaceae	India	aerial part	CE	Bacillus subtilis	+	MIC	128	µg/mL	N	418	high blood pressure, treatment of skin diseases, antiseptic, antidote		X	X			X
Croton bonplandianus Baill.	Croton	bonplandianus Baill.	Euphorbiaceae	India	aerial part	CA	Escherichia coli	-	MIC	128	µg/mL	N	418	high blood pressure, treatment of skin diseases, antiseptic, antidote		X	X			X
Croton bonplandianus Baill.	Croton	bonplandianus Baill.	Euphorbiaceae	India	aerial part	CE	Escherichia coli	-	MIC	128	µg/mL	N	418	high blood pressure, treatment of skin diseases, antiseptic, antidote		X	X			X
Croton bonplandianus Baill.	Croton	bonplandianus Baill.	Euphorbiaceae	India	aerial part	CA	Staphylococcus aureus	+	MIC	128	µg/mL	N	418	high blood pressure, treatment of skin diseases, antiseptic, antidote		X	X			X
Croton bonplandianus Baill.	Croton	bonplandianus Baill.	Euphorbiaceae	India	aerial part	CE	Staphylococcus aureus	+	MIC	128	µg/mL	N	418	high blood pressure, treatment of skin diseases, antiseptic, antidote		X	X			X
Croton bonplandianus Baill.	Croton	bonplandianus Baill.	Euphorbiaceae	India	aerial part	CA	Salmonella typhimurium	-	MIC	256	µg/mL	N	418	high blood pressure, treatment of skin diseases, antiseptic, antidote		X	X			X
Croton bonplandianus Baill.	Croton	bonplandianus Baill.	Euphorbiaceae	India	aerial part	CE	Salmonella typhimurium	-	MIC	256	µg/mL	N	418	high blood pressure, treatment of skin diseases, antiseptic, antidote		X	X			X
Croton cajucara Benth.	Croton	cajucara Benth.	Euphorbiaceae	Brazil	leaf	EO	Staphylococcus aureus (MRSA)	+	MIC	0.001	µg/mL	N	46	diarrhea, fever, hepatitis, malaria					X	X
Croton cajucara Benth.	Croton	cajucara Benth.	Euphorbiaceae	Brazil	leaf	EO	Mycobacterium tuberculosis	+	MIC	4.88	µg/mL	N	46	diarrhea, fever, hepatitis, malaria					X	X
Croton cajucara Benth.	Croton	cajucara Benth.	Euphorbiaceae	Brazil	leaf	EO	Mycobacterium smegmatis	+	MIC	39.06	µg/mL	N	46	diarrhea, fever, hepatitis, malaria					X	X
Croton campestris A.St.-Hil.	Croton	campestris A.St.-Hil.	Euphorbiaceae	Brazil	root bark	EO	Staphylococcus aureus	+	MIC	1.56	µg/mL	N	148	treatment for syphilis			X
Croton gratissimus Burch.	Croton	gratissimus Burch.	Euphorbiaceae	Sudan	stem	EO	Bacillus subtilis	+	MIC	16	µg/mL	N	468	cough, malaria						X							X
Croton gratissimus Burch.	Croton	gratissimus Burch.	Euphorbiaceae	Sudan	stem	EO	Escherichia coli	-	MIC	16	µg/mL	N	468	cough, malaria						X							X
Croton gratissimus Burch.	Croton	gratissimus Burch.	Euphorbiaceae	Sudan	stem	EO	Staphylococcus aureus	+	MIC	16	µg/mL	N	468	cough, malaria						X							X
Croton gratissimus Burch.	Croton	gratissimus Burch.	Euphorbiaceae	Sudan	stem	EO	Pseudomonas aeruginosa	-	MIC	250	µg/mL	N	468	cough, malaria						X							X
Croton heliotropiifolius Kunth	Croton	heliotropiifolius Kunth	Euphorbiaceae	Brazil	aerial part	EO	Bacillus subtilis	+	MIC	62.5	µg/mL	N	35	suspected bactericidal/larvicidal properties and GI disturbances					X	X
Croton heliotropiifolius Kunth	Croton	heliotropiifolius Kunth	Euphorbiaceae	Brazil	aerial part	CA	Staphylococcus aureus	+	MIC	500	µg/mL	N	35	suspected bactericidal/larvicidal properties and GI disturbances					X	X
Croton macrostachyus Hochst. ex Delile	Croton	macrostachyus Hochst. ex Delile	Euphorbiaceae	Ethiopia	leaf	CM	Mycobacterium tuberculosis	+	MIC	12.5	µg/mL	N	175	Tuberculosis treatment						X
Croton macrostachyus Hochst. ex Delile	Croton	macrostachyus Hochst. ex Delile	Euphorbiaceae	Ethiopia	leaf	CM	Mycobacterium bovis	+	MIC	25	µg/mL	N	175	Tuberculosis treatment						X
Croton macrostachyus Hochst. ex Delile	Croton	macrostachyus Hochst. ex Delile	Euphorbiaceae	Ethiopia	leaf, twig	CE	Streptococcus pyogenes	+	MIC	256	µg/mL	N	272	Tinea versicolor, diarrhea, eczema, allergic rashes, Athlete’s foot, gonorrhoea			X		X	X
Croton macrostachyus Hochst. ex Delile	Croton	macrostachyus Hochst. ex Delile	Euphorbiaceae	Cameroon	leaf	CM	Enterobacter aerogenes	-	MIC	128	µg/mL	N	459	NS	X
Croton macrostachyus Hochst. ex Delile	Croton	macrostachyus Hochst. ex Delile	Euphorbiaceae	Cameroon	leaf	CM	Enterobacter cloacae	-	MIC	256	µg/mL	N	459	NS	X
Croton macrostachyus Hochst. ex Delile	Croton	macrostachyus Hochst. ex Delile	Euphorbiaceae	Cameroon	leaf	CM	Escherichia coli	-	MIC	256	µg/mL	N	459	NS	X
Croton macrostachyus Hochst. ex Delile	Croton	macrostachyus Hochst. ex Delile	Euphorbiaceae	Cameroon	leaf	CM	Klebsiella pneumoniae	-	MIC	256	µg/mL	N	459	NS	X
Croton macrostachyus Hochst. ex Delile	Croton	macrostachyus Hochst. ex Delile	Euphorbiaceae	Cameroon	leaf	CM	Providencia stuartii	-	MIC	256	µg/mL	N	459	NS	X
Croton macrostachyus Hochst. ex Delile	Croton	macrostachyus Hochst. ex Delile	Euphorbiaceae	Cameroon	leaf	CM	Pseudomonas aeruginosa	-	MIC	256	µg/mL	N	459	NS	X
Croton macrostachyus Hochst. ex Delile	Croton	macrostachyus Hochst. ex Delile	Euphorbiaceae	Cameroon	leaf	CM	Staphylococcus aureus	+	MIC	256	µg/mL	N	459	NS	X
Croton macrostachyus Hochst. ex Delile	Croton	macrostachyus Hochst. ex Delile	Euphorbiaceae	Cameroon	leaf	CM	Staphylococcus aureus (MRSA)	+	MIC	256	µg/mL	N	459	NS	X
Cucurbita maxima Duchesne	Cucurbita	maxima Duchesne	Cucurbitaceae	Cameroon	bean	CM	Klebsiella pneumoniae	-	MIC	128	µg/mL	Y	326	NS	X
Cucurbita maxima Duchesne	Cucurbita	maxima Duchesne	Cucurbitaceae	Cameroon	bean	CM	Staphylococcus aureus (MRSA)	+	MIC	128	µg/mL	Y	463	NS	X
Cucurbita maxima Duchesne	Cucurbita	maxima Duchesne	Cucurbitaceae	Cameroon	bean	CM	Staphylococcus aureus (MSSA)	+	MIC	256	µg/mL	Y	463	NS	X
Cucurbita pepo L.	Cucurbita	pepo L.	Cucurbitaceae	Cameroon	leaf	CM	Enterobacter aerogenes	-	MIC	128	µg/mL	N	340	anthelmintic, hypertension, erysipelas, enteritis, dyspepsia, stomach disorders, jaundice		X	X		X
Cucurbita pepo L.	Cucurbita	pepo L.	Cucurbitaceae	Cameroon	leaf	CM	Enterobacter aerogenes	-	MIC	128	µg/mL	N	340	anthelmintic, hypertension, erysipelas, enteritis, dyspepsia, stomach disorders, jaundice		X	X		X
Cucurbita pepo L.	Cucurbita	pepo L.	Cucurbitaceae	Cameroon	leaf	CM	Enterobacter cloacae	-	MIC	128	µg/mL	N	340	anthelmintic, hypertension, erysipelas, enteritis, dyspepsia, stomach disorders, jaundice		X	X		X
Cucurbita pepo L.	Cucurbita	pepo L.	Cucurbitaceae	Cameroon	leaf	CM	Escherichia coli	-	MIC	256	µg/mL	N	340	anthelmintic, hypertension, erysipelas, enteritis, dyspepsia, stomach disorders, jaundice		X	X		X
Cucurbita pepo L.	Cucurbita	pepo L.	Cucurbitaceae	Cameroon	leaf	CM	Klebsiella pneumoniae	-	MIC	256	µg/mL	N	340	anthelmintic, hypertension, erysipelas, enteritis, dyspepsia, stomach disorders, jaundice		X	X		X
Cucurbita pepo L.	Cucurbita	pepo L.	Cucurbitaceae	Cameroon	leaf	CM	Klebsiella pneumoniae	-	MIC	256	µg/mL	N	340	anthelmintic, hypertension, erysipelas, enteritis, dyspepsia, stomach disorders, jaundice		X	X		X
Cucurbita pepo L.	Cucurbita	pepo L.	Cucurbitaceae	Cameroon	leaf	CM	Providencia stuartii	-	MIC	256	µg/mL	N	340	anthelmintic, hypertension, erysipelas, enteritis, dyspepsia, stomach disorders, jaundice		X	X		X
Cucurbita pepo L.	Cucurbita	pepo L.	Cucurbitaceae	Cameroon	leaf	CM	Pseudomonas aeruginosa	-	MIC	256	µg/mL	N	340	anthelmintic, hypertension, erysipelas, enteritis, dyspepsia, stomach disorders, jaundice		X	X		X
Cullen australasicum (Schltdl.) J.W. Grimes	Cullen	australasicum (Schltdl.) J.W. Grimes	Fabaceae	Australia	leaf	CE	Campylobacter jejuni	-	MIC	128	µg/mL	N	243	NS	X
Cullen discolor (Domin) J.W.Grimes	Cullen	discolor (Domin) J.W.Grimes	Fabaceae	Australia	leaf	CE	Campylobacter jejuni	-	MIC	256	µg/mL	N	243	NS	X
Cuminum cyminum L.	Cuminum	cyminum L.	Apiaceae	Iran	seed	EO	Endodontic anaerobic bacterial mixture	N/A	MIC	14	µg/mL	N	1	antioxidant, antibacterial, antifungal, analgesic						X				X
Cuminum cyminum L.	Cuminum	cyminum L.	Apiaceae	Iran	seed	EO	Endodontic aerobic bacterial mixture	N/A	MIC	89	µg/mL	N	1	antioxidant, antibacterial, antifungal, analgesic						X				X
Cuminum cyminum L.	Cuminum	cyminum L.	Apiaceae	Iran	seed	EO	Enterococcus faecalis	+	MIC	185	µg/mL	N	1	antioxidant, antibacterial, antifungal, analgesic						X				X
Cuminum cyminum L.	Cuminum	cyminum L.	Apiaceae	Bangladesh	seed	EO	Bacillus megaterium	+	MIC	62.5	µg/mL	N	24	carminative, stomach pain, appetite stimulant				X	X
Cuminum cyminum L.	Cuminum	cyminum L.	Apiaceae	Bangladesh	seed	EO	Bacillus simplex	+	MIC	62.5	µg/mL	N	24	carminative, stomach pain, appetite stimulant				X	X
Cuminum cyminum L.	Cuminum	cyminum L.	Apiaceae	Bangladesh	seed	CChl	Bacillus simplex	+	MIC	62.5	µg/mL	N	24	carminative, stomach pain, appetite stimulant				X	X
Cuminum cyminum L.	Cuminum	cyminum L.	Apiaceae	Bangladesh	seed	CHex	Bacillus simplex	+	MIC	62.5	µg/mL	N	24	carminative, stomach pain, appetite stimulant				X	X
Cuminum cyminum L.	Cuminum	cyminum L.	Apiaceae	Bangladesh	seed	CE	Paenibacillus sp.	var	MIC	62.5	µg/mL	N	24	carminative, stomach pain, appetite stimulant				X	X
Cuminum cyminum L.	Cuminum	cyminum L.	Apiaceae	Bangladesh	seed	CChl	Terribacillus sp.	+	MIC	62.5	µg/mL	N	24	carminative, stomach pain, appetite stimulant				X	X
Cuminum cyminum L.	Cuminum	cyminum L.	Apiaceae	Bangladesh	seed	CEtOAc	Terribacillus sp.	+	MIC	62.5	µg/mL	N	24	carminative, stomach pain, appetite stimulant				X	X
Cuminum cyminum L.	Cuminum	cyminum L.	Apiaceae	Bangladesh	seed	EO	Bacillus cereus	+	MIC	125	µg/mL	N	24	carminative, stomach pain, appetite stimulant				X	X
Cuminum cyminum L.	Cuminum	cyminum L.	Apiaceae	Bangladesh	seed	CE	Bacillus cereus	+	MIC	125	µg/mL	N	24	carminative, stomach pain, appetite stimulant				X	X
Cuminum cyminum L.	Cuminum	cyminum L.	Apiaceae	Bangladesh	seed	CChl	Bacillus megaterium	+	MIC	125	µg/mL	N	24	carminative, stomach pain, appetite stimulant				X	X
Cuminum cyminum L.	Cuminum	cyminum L.	Apiaceae	Bangladesh	seed	CHex	Bacillus megaterium	+	MIC	125	µg/mL	N	24	carminative, stomach pain, appetite stimulant				X	X
Cuminum cyminum L.	Cuminum	cyminum L.	Apiaceae	Bangladesh	seed	CE	Bacillus simplex	+	MIC	125	µg/mL	N	24	carminative, stomach pain, appetite stimulant				X	X
Cuminum cyminum L.	Cuminum	cyminum L.	Apiaceae	Bangladesh	seed	EO	Terribacillus sp.	+	MIC	125	µg/mL	N	24	carminative, stomach pain, appetite stimulant				X	X
Cuminum cyminum L.	Cuminum	cyminum L.	Apiaceae	Bangladesh	seed	CEtOAc	Bacillus cereus	+	MIC	250	µg/mL	N	24	carminative, stomach pain, appetite stimulant				X	X
Cuminum cyminum L.	Cuminum	cyminum L.	Apiaceae	Bangladesh	seed	CEtOAc	Bacillus megaterium	+	MIC	250	µg/mL	N	24	carminative, stomach pain, appetite stimulant				X	X
Cuminum cyminum L.	Cuminum	cyminum L.	Apiaceae	Bangladesh	seed	EO	Paenibacillus sp.	var	MIC	250	µg/mL	N	24	carminative, stomach pain, appetite stimulant				X	X
Cuminum cyminum L.	Cuminum	cyminum L.	Apiaceae	Bangladesh	seed	CHex	Paenibacillus sp.	var	MIC	250	µg/mL	N	24	carminative, stomach pain, appetite stimulant				X	X
Cuminum cyminum L.	Cuminum	cyminum L.	Apiaceae	Bangladesh	seed	CChl	Paenibacillus sp.	var	MIC	250	µg/mL	N	24	carminative, stomach pain, appetite stimulant				X	X
Cuminum cyminum L.	Cuminum	cyminum L.	Apiaceae	Bangladesh	seed	CHex	Paenibacillus sp.	var	MIC	250	µg/mL	N	24	carminative, stomach pain, appetite stimulant				X	X
Cuminum cyminum L.	Cuminum	cyminum L.	Apiaceae	Bangladesh	seed	CE	Terribacillus sp.	+	MIC	250	µg/mL	N	24	carminative, stomach pain, appetite stimulant				X	X
Cuminum cyminum L.	Cuminum	cyminum L.	Apiaceae	Bangladesh	seed	CHex	Terribacillus sp.	+	MIC	250	µg/mL	N	24	carminative, stomach pain, appetite stimulant				X	X
Cuminum cyminum L.	Cuminum	cyminum L.	Apiaceae	Bangladesh	seed	CChl	Bacillus cereus	+	MIC	500	µg/mL	N	24	carminative, stomach pain, appetite stimulant				X	X
Cuminum cyminum L.	Cuminum	cyminum L.	Apiaceae	Bangladesh	seed	CHex	Bacillus cereus	+	MIC	500	µg/mL	N	24	carminative, stomach pain, appetite stimulant				X	X
Cuminum cyminum L.	Cuminum	cyminum L.	Apiaceae	Bangladesh	seed	CE	Bacillus megaterium	+	MIC	500	µg/mL	N	24	carminative, stomach pain, appetite stimulant				X	X
Cuminum cyminum L.	Cuminum	cyminum L.	Apiaceae	Bangladesh	seed	CEtOAc	Bacillus simplex	+	MIC	500	µg/mL	N	24	carminative, stomach pain, appetite stimulant				X	X
Cuminum cyminum L.	Cuminum	cyminum L.	Apiaceae	Bangladesh	seed	CEtOAc	Paenibacillus sp.	var	MIC	500	µg/mL	N	24	carminative, stomach pain, appetite stimulant				X	X
Cuminum cyminum L.	Cuminum	cyminum L.	Apiaceae	Bangladesh	seed	EO	Paenibacillus sp.	var	MIC	500	µg/mL	N	24	carminative, stomach pain, appetite stimulant				X	X
Cuminum cyminum L.	Cuminum	cyminum L.	Apiaceae	Bangladesh	seed	CE	Paenibacillus sp.	var	MIC	500	µg/mL	N	24	carminative, stomach pain, appetite stimulant				X	X
Cuminum cyminum L.	Cuminum	cyminum L.	Apiaceae	Bangladesh	seed	CEtOAc	Paenibacillus sp.	var	MIC	500	µg/mL	N	24	carminative, stomach pain, appetite stimulant				X	X
Cuminum cyminum L.	Cuminum	cyminum L.	Apiaceae	Bangladesh	seed	CChl	Paenibacillus sp.	var	MIC	500	µg/mL	N	24	carminative, stomach pain, appetite stimulant				X	X
Cupressus macrocarpa Hartw	Cupressus	macrocarpa Hartw	Cupressaceae	Egypt	branchlet	EO	Escherichia coli	-	MIC	70	µg/mL	N	389	rheumatism, whooping cough, and styptic problems		X							X				X
Cupressus macrocarpa Hartw	Cupressus	macrocarpa Hartw	Cupressaceae	Egypt	branchlet	EO	Bacillus cereus	+	MIC	120	µg/mL	N	389	rheumatism, whooping cough, and styptic problems		X							X				X
Cupressus macrocarpa Hartw	Cupressus	macrocarpa Hartw	Cupressaceae	Egypt	branchlet	EO	Pectobacterium carotovorum	-	MIC	130	µg/mL	N	389	rheumatism, whooping cough, and styptic problems		X							X				X
Cupressus macrocarpa Hartw	Cupressus	macrocarpa Hartw	Cupressaceae	Egypt	branchlet	EO	Pectobacterium atrosepticum	-	MIC	170	µg/mL	N	389	rheumatism, whooping cough, and styptic problems		X							X				X
Cupressus macrocarpa Hartw	Cupressus	macrocarpa Hartw	Cupressaceae	Egypt	branchlet	EO	Staphylococcus aureus	+	MIC	250	µg/mL	N	389	rheumatism, whooping cough, and styptic problems		X							X				X
Cupressus sempervirens L.	Cupressus	sempervirens L.	Cupressaceae	Italy	leaf	EO	Staphylococcus aureus	+	MIC	50	μL/mL	N	84	NS	X
Cupressus sempervirens L.	Cupressus	sempervirens L.	Cupressaceae	U.S.A. (Mississippi)	fruit	CE	Staphylococcus aureus (MRSA)	+	IC50	11.45	µg/mL	N	474	cold, flu, sore throat, rheumatism						X			X				X
Cupressus sempervirens L.	Cupressus	sempervirens L.	Cupressaceae	U.S.A. (Mississippi)	fruit	CE	Staphylococcus aureus (MSSA)	+	IC50	12.48	µg/mL	N	474	cold, flu, sore throat, rheumatism						X			X				X
Curculigo orchioides Gaertn.	Curculigo	orchioides Gaertn.	Hypoxidaceae	Nepal	rhizome	CE	Streptococcus pyogenes	+	MIC	49	µg/mL	Y	286	Diarrhea, dysentery, demulcent, diuretic, skin disease			X		X		X						X
Curculigo orchioides Gaertn.	Curculigo	orchioides Gaertn.	Hypoxidaceae	China	whole plant	CE	Staphylococcus aureus (MRSA)	+	MIC	256	µg/mL	Y	480	diarrhea, ulcer, pus, and muscles atrophy			X		X				X
Curcuma aromatica Salisb	Curcuma	aromatica Salisb	Zingiberaceae	Bangladesh	rhizome	CPEt	Bacillus subtilis	+	MIC	30	µg/mL	N	407	remove blood stasis, treat cancers and angiogenesis, prevention of Alzheimer's		X				X				X
Curcuma aromatica Salisb	Curcuma	aromatica Salisb	Zingiberaceae	Bangladesh	rhizome	CChl	Bacillus subtilis	+	MIC	60	µg/mL	N	407	remove blood stasis, treat cancers and angiogenesis, prevention of Alzheimer's		X				X				X
Curcuma aromatica Salisb	Curcuma	aromatica Salisb	Zingiberaceae	Bangladesh	rhizome	CPEt	Staphylococcus aureus	+	MIC	60	µg/mL	N	407	remove blood stasis, treat cancers and angiogenesis, prevention of Alzheimer's		X				X				X
Curcuma aromatica Salisb	Curcuma	aromatica Salisb	Zingiberaceae	Bangladesh	rhizome	CPEt	Shigella dysenteriae	-	MIC	130	µg/mL	N	407	remove blood stasis, treat cancers and angiogenesis, prevention of Alzheimer's		X				X				X
Curcuma aromatica Salisb	Curcuma	aromatica Salisb	Zingiberaceae	Bangladesh	rhizome	CChl	Staphylococcus aureus	+	MIC	130	µg/mL	N	407	remove blood stasis, treat cancers and angiogenesis, prevention of Alzheimer's		X				X				X
Curcuma aromatica Salisb	Curcuma	aromatica Salisb	Zingiberaceae	Bangladesh	rhizome	CPEt	Pseudomonas aeruginosa	-	MIC	250	µg/mL	N	407	remove blood stasis, treat cancers and angiogenesis, prevention of Alzheimer's		X				X				X
Curcuma aromatica Salisb	Curcuma	aromatica Salisb	Zingiberaceae	Bangladesh	rhizome	CChl	Shigella dysenteriae	-	MIC	250	µg/mL	N	407	remove blood stasis, treat cancers and angiogenesis, prevention of Alzheimer's		X				X				X
Curcuma aromatica Salisb	Curcuma	aromatica Salisb	Zingiberaceae	Bangladesh	rhizome	CPEt	Shigella sonnei	-	MIC	250	µg/mL	N	407	remove blood stasis, treat cancers and angiogenesis, prevention of Alzheimer's		X				X				X
Curcuma aromatica Salisb	Curcuma	aromatica Salisb	Zingiberaceae	Bangladesh	rhizome	CChl	Shigella sonnei	-	MIC	250	µg/mL	N	407	remove blood stasis, treat cancers and angiogenesis, prevention of Alzheimer's		X				X				X
Curcuma aromatica Salisb	Curcuma	aromatica Salisb	Zingiberaceae	Bangladesh	rhizome	CChl	Pseudomonas aeruginosa	-	MIC	500	µg/mL	N	407	remove blood stasis, treat cancers and angiogenesis, prevention of Alzheimer's		X				X				X
Curcuma longa L.	Curcuma	longa L.	Zingiberaceae	India	rhizome	CA	Proteus mirabilis	-	MIC	5.92	µg/mL	N	96	treat infectious diseases hepatic diseases, heumatism and anorexia					X	X			X	X
Curcuma longa L.	Curcuma	longa L.	Zingiberaceae	India	rhizome	CA	Bacillus subtilis	+	MIC	6.5	µg/mL	N	96	treat infectious diseases hepatic diseases, heumatism and anorexia					X	X			X	X
Curcuma longa L.	Curcuma	longa L.	Zingiberaceae	India	rhizome	CE	Proteus mirabilis	-	MIC	6.52	µg/mL	N	96	treat infectious diseases hepatic diseases, heumatism and anorexia					X	X			X	X
Curcuma longa L.	Curcuma	longa L.	Zingiberaceae	India	rhizome	CM	Bacillus subtilis	+	MIC	6.62	µg/mL	N	96	treat infectious diseases hepatic diseases, heumatism and anorexia					X	X			X	X
Curcuma longa L.	Curcuma	longa L.	Zingiberaceae	India	rhizome	CA	Staphylococcus aureus	+	MIC	6.77	µg/mL	N	96	treat infectious diseases hepatic diseases, heumatism and anorexia					X	X			X	X
Curcuma longa L.	Curcuma	longa L.	Zingiberaceae	India	rhizome	CA	Klebsiella pneumoniae	-	MIC	6.8	µg/mL	N	96	treat infectious diseases hepatic diseases, heumatism and anorexia					X	X			X	X
Curcuma longa L.	Curcuma	longa L.	Zingiberaceae	India	rhizome	CAcet	Pseudomonas aeruginosa	-	MIC	7.27	µg/mL	N	96	treat infectious diseases hepatic diseases, heumatism and anorexia					X	X			X	X
Curcuma longa L.	Curcuma	longa L.	Zingiberaceae	India	rhizome	CAcet	Bacillus subtilis	+	MIC	7.43	µg/mL	N	96	treat infectious diseases hepatic diseases, heumatism and anorexia					X	X			X	X
Curcuma longa L.	Curcuma	longa L.	Zingiberaceae	India	rhizome	CAcet	Escherichia coli	-	MIC	7.58	µg/mL	N	96	treat infectious diseases hepatic diseases, heumatism and anorexia					X	X			X	X
Curcuma longa L.	Curcuma	longa L.	Zingiberaceae	India	rhizome	CAcet	Proteus mirabilis	-	MIC	7.6	µg/mL	N	96	treat infectious diseases hepatic diseases, heumatism and anorexia					X	X			X	X
Curcuma longa L.	Curcuma	longa L.	Zingiberaceae	India	rhizome	CM	Pseudomonas aeruginosa	-	MIC	9.33	µg/mL	N	96	treat infectious diseases hepatic diseases, heumatism and anorexia					X	X			X	X
Curcuma longa L.	Curcuma	longa L.	Zingiberaceae	India	rhizome	CE	Pseudomonas aeruginosa	-	MIC	10.67	µg/mL	N	96	treat infectious diseases hepatic diseases, rheumatism and anorexia					X	X			X	X
Curcuma longa L.	Curcuma	longa L.	Zingiberaceae	India	rhizome	CE	Bacillus subtilis	+	MIC	11.64	µg/mL	N	96	treat infectious diseases hepatic diseases, heumatism and anorexia					X	X			X	X
Curcuma longa L.	Curcuma	longa L.	Zingiberaceae	India	rhizome	CE	Escherichia coli	-	MIC	12.09	µg/mL	N	96	treat infectious diseases hepatic diseases, heumatism and anorexia					X	X			X	X
Curcuma longa L.	Curcuma	longa L.	Zingiberaceae	India	rhizome	CE	Klebsiella pneumoniae	-	MIC	12.12	µg/mL	N	96	treat infectious diseases hepatic diseases, heumatism and anorexia					X	X			X	X
Curcuma longa L.	Curcuma	longa L.	Zingiberaceae	India	rhizome	CM	Klebsiella pneumoniae	-	MIC	12.13	µg/mL	N	96	treat infectious diseases hepatic diseases, heumatism and anorexia					X	X			X	X
Curcuma longa L.	Curcuma	longa L.	Zingiberaceae	India	rhizome	CM	Proteus mirabilis	-	MIC	12.43	µg/mL	N	96	treat infectious diseases hepatic diseases, heumatism and anorexia					X	X			X	X
Curcuma longa L.	Curcuma	longa L.	Zingiberaceae	India	rhizome	CE	Staphylococcus aureus	+	MIC	12.44	µg/mL	N	96	treat infectious diseases hepatic diseases, heumatism and anorexia					X	X			X	X
Curcuma longa L.	Curcuma	longa L.	Zingiberaceae	India	rhizome	CM	Escherichia coli	-	MIC	12.62	µg/mL	N	96	treat infectious diseases hepatic diseases, heumatism and anorexia					X	X			X	X
Curcuma longa L.	Curcuma	longa L.	Zingiberaceae	India	rhizome	CM	Staphylococcus aureus	+	MIC	12.68	µg/mL	N	96	treat infectious diseases hepatic diseases, heumatism and anorexia					X	X			X	X
Curcuma longa L.	Curcuma	longa L.	Zingiberaceae	India	rhizome	CA	Escherichia coli	-	MIC	12.73	µg/mL	N	96	treat infectious diseases hepatic diseases, heumatism and anorexia					X	X			X	X
Curcuma longa L.	Curcuma	longa L.	Zingiberaceae	India	rhizome	CA	Pseudomonas aeruginosa	-	MIC	14.08	µg/mL	N	96	treat infectious diseases hepatic diseases, heumatism and anorexia					X	X			X	X
Curcuma longa L.	Curcuma	longa L.	Zingiberaceae	India	rhizome	CAcet	Staphylococcus aureus	+	MIC	14.43	µg/mL	N	96	treat infectious diseases hepatic diseases, heumatism and anorexia					X	X			X	X
Curcuma longa L.	Curcuma	longa L.	Zingiberaceae	India	rhizome	CAcet	Klebsiella pneumoniae	-	MIC	14.72	µg/mL	N	96	treat infectious diseases hepatic diseases, heumatism and anorexia					X	X			X	X
Curcuma longa L.	Curcuma	longa L.	Zingiberaceae	Pakistan	root	CE	Staphylococcus aureus (VRSA)	+	MIC	12.44	µg/mL	Y	262	NS	X
Curcuma longa L.	Curcuma	longa L.	Zingiberaceae	Nepal	rhizome	CE	Enterococcus faecalis	+	MIC	98	µg/mL	Y	286	antiseptic, cuts, wounds, anthelmintic, jaundice, liver disorders			X		X	X
Curcuma mangga Valeton & Zijp	Curcuma	mangga Valeton & Zijp	Zingiberaceae	Indonesia	rhizome	CE	Staphylococcus aureus	+	MIC	256	µg/mL	N	378	NS	X
Curcuma zanthorrhiza Roxb.	Curcuma	zanthorrhiza Roxb.	Zingiberaceae	Indonesia	rhizome	CE	Staphylococcus aureus (MSSA)	+	MIC	256	µg/mL	Y	423	stomach disease, liver disorder, constipation, dysentary, diarrhea, children's fever, hemorrhoids					X	X
Curcuma zedoaria (Christm.) Roscoe	Curcuma	zedoaria (Christm.) Roscoe	Zingiberaceae	Thailand	rhizome	NS	Streptococcus pyogenes	+	MIC	500	µg/mL	N	264	NS	X
Curtisia dentata (Burm.f.) C.A.Sm.	Curtisia	dentata (Burm.f.) C.A.Sm.	Curtisiaceae	South Africa	leaf	CM	Mycobacterium tuberculosis	+	MIC	22.2	µg/mL	N	155	treats TB, stomach aches, and STIs					X	X
Curtisia dentata (Burm.f.) C.A.Sm.	Curtisia	dentata (Burm.f.) C.A.Sm.	Curtisiaceae	South Africa	leaf	CA	Mycobacterium tuberculosis	+	MIC	44.2	µg/mL	N	155	treats TB, stomach aches, and STIs					X	X
Curtisia dentata (Burm.f.) C.A.Sm.	Curtisia	dentata (Burm.f.) C.A.Sm.	Curtisiaceae	South Africa	leaf	CM	Staphylococcus aureus (MRSA)	+	MIC	78.12	µg/mL	N	333	diarrhea, stomach ailments, tanning					X	X
Curtisia dentata (Burm.f.) C.A.Sm.	Curtisia	dentata (Burm.f.) C.A.Sm.	Curtisiaceae	South Africa	stem bark	CM	Citrobacter freundii (chloramphenicol-R)	-	MIC	156.25	µg/mL	N	333	diarrhea, stomach ailments, tanning					X	X
Curtisia dentata (Burm.f.) C.A.Sm.	Curtisia	dentata (Burm.f.) C.A.Sm.	Curtisiaceae	South Africa	stem bark	CM	Escherichia coli (Beta-lactamase +)	-	MIC	156.25	µg/mL	N	333	diarrhea, stomach ailments, tanning					X	X
Curtisia dentata (Burm.f.) C.A.Sm.	Curtisia	dentata (Burm.f.) C.A.Sm.	Curtisiaceae	South Africa	stem bark	CM	Klebsiella pneumoniae (Ampicillin-R)	-	MIC	156.25	µg/mL	N	333	diarrhea, stomach ailments, tanning					X	X
Curtisia dentata (Burm.f.) C.A.Sm.	Curtisia	dentata (Burm.f.) C.A.Sm.	Curtisiaceae	South Africa	stem bark	CM	Pseudomonas aeruginosa (Carbenicillin-R)	-	MIC	156.25	µg/mL	N	333	diarrhea, stomach ailments, tanning					X	X
Curtisia dentata (Burm.f.) C.A.Sm.	Curtisia	dentata (Burm.f.) C.A.Sm.	Curtisiaceae	South Africa	stem bark	CM	Staphylococcus aureus (MRSA)	+	MIC	156.25	µg/mL	N	333	diarrhea, stomach ailments, tanning					X	X
Curtisia dentata (Burm.f.) C.A.Sm.	Curtisia	dentata (Burm.f.) C.A.Sm.	Curtisiaceae	South Africa	leaf	CM	Klebsiella pneumoniae (Ampicillin-R)	-	MIC	312.5	µg/mL	N	333	diarrhea, stomach ailments, tanning					X	X
Curtisia dentata (Burm.f.) C.A.Sm.	Curtisia	dentata (Burm.f.) C.A.Sm.	Curtisiaceae	South Africa	leaf	CM	Pseudomonas aeruginosa (Carbenicillin-R)	-	MIC	312.5	µg/mL	N	333	diarrhea, stomach ailments, tanning					X	X
Curtisia dentata (Burm.f.) C.A.Sm.	Curtisia	dentata (Burm.f.) C.A.Sm.	Curtisiaceae	South Africa	stem bark	CE	Enterococcus faecalis	+	MIC	19.5	µg/mL	N	354	stomach ailments, diarrhea, blood purifier, aphrodisiac		X			X		X			X
Curtisia dentata (Burm.f.) C.A.Sm.	Curtisia	dentata (Burm.f.) C.A.Sm.	Curtisiaceae	South Africa	stem bark	CE	Proteus vulgaris	-	MIC	19.5	µg/mL	N	354	stomach ailments, diarrhea, blood purifier, aphrodisiac		X			X		X			X
Curtisia dentata (Burm.f.) C.A.Sm.	Curtisia	dentata (Burm.f.) C.A.Sm.	Curtisiaceae	South Africa	stem bark	CE	Serratia marcescens	-	MIC	19.5	µg/mL	N	354	stomach ailments, diarrhea, blood purifier, aphrodisiac		X			X		X			X
Curtisia dentata (Burm.f.) C.A.Sm.	Curtisia	dentata (Burm.f.) C.A.Sm.	Curtisiaceae	South Africa	stem bark	CE	Staphylococcus aureus (MSSA)	+	MIC	19.5	µg/mL	N	354	stomach ailments, diarrhea, blood purifier, aphrodisiac		X			X		X			X
Curtisia dentata (Burm.f.) C.A.Sm.	Curtisia	dentata (Burm.f.) C.A.Sm.	Curtisiaceae	South Africa	stem bark	CE	Klebsiella pneumoniae	-	MIC	156.2	µg/mL	N	354	stomach ailments, diarrhea, blood purifier, aphrodisiac		X			X		X			X
Curtisia dentata (Burm.f.) C.A.Sm.	Curtisia	dentata (Burm.f.) C.A.Sm.	Curtisiaceae	South Africa	stem bark	CE	Bacillus cereus	+	MIC	312.5	µg/mL	N	354	stomach ailments, diarrhea, blood purifier, aphrodisiac		X			X		X			X
Curtisia dentata (Burm.f.) C.A.Sm.	Curtisia	dentata (Burm.f.) C.A.Sm.	Curtisiaceae	South Africa	stem bark	CE	Pseudomonas aeruginosa	-	MIC	312.5	µg/mL	N	354	stomach ailments, diarrhea, blood purifier, aphrodisiac		X			X		X			X
Curtisia dentata (Burm.f.) C.A.Sm.	Curtisia	dentata (Burm.f.) C.A.Sm.	Curtisiaceae	South Africa	leaf	CM	Staphylococcus aureus	+	MIC	310	µg/mL	N	419	management of cancer						X
Cymbopogon citratus (DC.) Stapf	Cymbopogon	citratus (DC.) Stapf	Poaceae	Brazil	leaf	EO	Fusobacterium nucleatum	-	MIC	250	µg/mL	N	66	antimicrobial activity against oral biofilms												X
Cymbopogon citratus (DC.) Stapf	Cymbopogon	citratus (DC.) Stapf	Poaceae	Brazil	leaf	EO	Porphyromonas gingivalis	-	MIC	250	µg/mL	N	66	antimicrobial activity against oral biofilms												X
Cymbopogon citratus (DC.) Stapf	Cymbopogon	citratus (DC.) Stapf	Poaceae	Brazil	leaf	EO	Streptococcus mitis	+	MIC	250	µg/mL	N	66	antimicrobial activity against oral biofilms												X
Cymbopogon citratus (DC.) Stapf	Cymbopogon	citratus (DC.) Stapf	Poaceae	Brazil	leaf	EO	Streptococcus sanguinis	+	MIC	500	µg/mL	N	66	antimicrobial activity against oral biofilms												X
Cymbopogon citratus (DC.) Stapf	Cymbopogon	citratus (DC.) Stapf	Poaceae	NS	leaf	EO	Staphylococcus aureus	+	MIC	100	µg/mL	N	440	NS	X
Cymbopogon citratus (DC.) Stapf	Cymbopogon	citratus (DC.) Stapf	Poaceae	NS	leaf	EO	Escherichia coli	-	MIC	400	µg/mL	N	440	NS	X
Cymbopogon martini (Roxb.) W.Watson	Cymbopogon	martini (Roxb.) W.Watson	Poaceae	Brazil	leaf	EO	Fusobacterium nucleatum	-	MIC	125	µg/mL	N	66	antimicrobial activity against oral biofilms												X
Cymbopogon martini (Roxb.) W.Watson	Cymbopogon	martini (Roxb.) W.Watson	Poaceae	Brazil	leaf	EO	Porphyromonas gingivalis	-	MIC	250	µg/mL	N	66	antimicrobial activity against oral biofilms												X
Cymbopogon martini (Roxb.) W.Watson	Cymbopogon	martini (Roxb.) W.Watson	Poaceae	Brazil	leaf	EO	Streptococcus mitis	+	MIC	250	µg/mL	N	66	antimicrobial activity against oral biofilms												X
Cymbopogon martini (Roxb.) W.Watson	Cymbopogon	martini (Roxb.) W.Watson	Poaceae	Brazil	leaf	EO	Streptococcus sanguinis	+	MIC	500	µg/mL	N	66	antimicrobial activity against oral biofilms												X
Cymbopogon martini (Roxb.) W.Watson	Cymbopogon	martini (Roxb.) W.Watson	Poaceae	NS	leaf	EO	Escherichia coli	-	MIC	200	µg/mL	N	440	NS	X
Cymbopogon martini (Roxb.) W.Watson	Cymbopogon	martini (Roxb.) W.Watson	Poaceae	NS	leaf	EO	Staphylococcus aureus	+	MIC	200	µg/mL	N	440	NS	X
Cymbopogon nardus (L.) Rendle	Cymbopogon	nardus (L.) Rendle	Poaceae	NS	leaf	EO	Escherichia coli	-	MIC	200	µg/mL	N	440	NS	X
Cymbopogon nardus (L.) Rendle	Cymbopogon	nardus (L.) Rendle	Poaceae	NS	leaf	EO	Staphylococcus aureus	+	MIC	200	µg/mL	N	440	NS	X
Cymbopogon schoenanthus L. Spreng	Cymbopogon	schoenanthus L. Spreng	Poaceae	Sudan	stem	EO	Bacillus subtilis	+	MIC	16	µg/mL	N	468	gout, prostate inflammation, stomach pain, kidney disease					X	X	X		X
Cymbopogon schoenanthus L. Spreng	Cymbopogon	schoenanthus L. Spreng	Poaceae	Sudan	stem	EO	Escherichia coli	-	MIC	16	µg/mL	N	468	gout, prostate inflammation, stomach pain, kidney disease					X	X	X		X
Cymbopogon schoenanthus L. Spreng	Cymbopogon	schoenanthus L. Spreng	Poaceae	Sudan	stem	EO	Staphylococcus aureus	+	MIC	16	µg/mL	N	468	gout, prostate inflammation, stomach pain, kidney disease					X	X	X		X
Cymbopogon winterianus Jowitt ex Bor	Cymbopogon	winterianus Jowitt ex Bor	Poaceae	Brazil	leaf	EO	Fusobacterium nucleatum	-	MIC	125	µg/mL	N	66	antimicrobial activity against oral biofilms												X
Cymbopogon winterianus Jowitt ex Bor	Cymbopogon	winterianus Jowitt ex Bor	Poaceae	Brazil	leaf	EO	Porphyromonas gingivalis	-	MIC	250	µg/mL	N	66	antimicrobial activity against oral biofilms												X
Cymbopogon winterianus Jowitt ex Bor	Cymbopogon	winterianus Jowitt ex Bor	Poaceae	Brazil	leaf	EO	Streptococcus mitis	+	MIC	250	µg/mL	N	66	antimicrobial activity against oral biofilms												X
Cymbopogon winterianus Jowitt ex Bor	Cymbopogon	winterianus Jowitt ex Bor	Poaceae	Brazil	leaf	EO	Streptococcus sanguinis	+	MIC	500	µg/mL	N	66	antimicrobial activity against oral biofilms												X
Cynanchum chinense R. Br.	Cynanchum	chinense R. Br.	Apocynaceae	China	leaf	EO	Pseudomonas aeruginosa	-	MIC	5	μL/mL	N	471	NS	X
Cynanchum chinense R. Br.	Cynanchum	chinense R. Br.	Apocynaceae	China	leaf	EO	Bacillus cereus	+	MIC	10	μL/mL	N	471	NS	X
Cynanchum chinense R. Br.	Cynanchum	chinense R. Br.	Apocynaceae	China	leaf	EO	Bacillus subtilis	+	MIC	10	μL/mL	N	471	NS	X
Cynanchum chinense R. Br.	Cynanchum	chinense R. Br.	Apocynaceae	China	leaf	EO	Proteus mirabilis	-	MIC	10	μL/mL	N	471	NS	X
Cynanchum chinense R. Br.	Cynanchum	chinense R. Br.	Apocynaceae	China	leaf	EO	Proteus vulgaris	-	MIC	10	μL/mL	N	471	NS	X
Cynanchum chinense R. Br.	Cynanchum	chinense R. Br.	Apocynaceae	China	leaf	EO	Escherichia coli	-	MIC	20	μL/mL	N	471	NS	X
Cynanchum chinense R. Br.	Cynanchum	chinense R. Br.	Apocynaceae	China	leaf	EO	Lactobacillus plantarum	+	MIC	20	μL/mL	N	471	NS	X
Cynanchum chinense R. Br.	Cynanchum	chinense R. Br.	Apocynaceae	China	leaf	EO	Salmonella enteritidis	-	MIC	20	μL/mL	N	471	NS	X
Cynanchum chinense R. Br.	Cynanchum	chinense R. Br.	Apocynaceae	China	leaf	EO	Shigella flexneri	-	MIC	20	μL/mL	N	471	NS	X
Cynanchum chinense R. Br.	Cynanchum	chinense R. Br.	Apocynaceae	China	leaf	EO	Shigella sonnei	-	MIC	20	μL/mL	N	471	NS	X
Cynanchum chinense R. Br.	Cynanchum	chinense R. Br.	Apocynaceae	China	leaf	EO	Staphylococcus aureus	+	MIC	20	μL/mL	N	471	NS	X
Cynanchum viminale (L.) L.	Cynanchum	viminale (L.) L.	Apocynaceae	South Africa	stem	CM/Dichl (1:1)	Shigella flexneri	-	MIC	500	µg/mL	N	452	diarrhea					X
Cynodon dactylon (L.) Pers.	Cynodon	dactylon (L.) Pers.	Poaceae	India	whole plant	CM	Pseudomonas aeruginosa	-	MIC	250	µg/mL	N	49	adhesion, wound healing, and improves skin texture			X
Cynodon dactylon (L.) Pers.	Cynodon	dactylon (L.) Pers.	Poaceae	India	whole plant	CA	Pseudomonas aeruginosa	-	MIC	250	µg/mL	N	49	adhesion, wound healing, and improves skin texture			X
Cynodon dactylon (L.) Pers.	Cynodon	dactylon (L.) Pers.	Poaceae	Nepal	whole plant	Fr.	Staphylococcus aureus	+	MIC	31	µg/mL	Y	286	Cuts, wounds, indigestion, genitourinary disorders			X		X		X
Cynodon dactylon (L.) Pers.	Cynodon	dactylon (L.) Pers.	Poaceae	Nepal	whole plant	Fr.	Escherichia coli	-	MIC	63	µg/mL	Y	286	Cuts, wounds, indigestion, genitourinary disorders			X		X		X
Cynodon dactylon (L.) Pers.	Cynodon	dactylon (L.) Pers.	Poaceae	Nepal	whole plant	Fr.	Staphylococcus aureus (MRSA)	+	MIC	63	µg/mL	Y	286	Cuts, wounds, indigestion, genitourinary disorders			X		X		X
Cynodon dactylon (L.) Pers.	Cynodon	dactylon (L.) Pers.	Poaceae	Nepal	whole plant	Fr.	Enterobacter cloacae	-	MIC	125	µg/mL	Y	286	Cuts, wounds, indigestion, genitourinary disorders			X		X		X
Cynodon dactylon (L.) Pers.	Cynodon	dactylon (L.) Pers.	Poaceae	Nepal	whole plant	CE	Staphylococcus aureus	+	MIC	195	µg/mL	Y	286	Cuts, wounds, indigestion, genitourinary disorders			X		X		X
Cynodon dactylon (L.) Pers.	Cynodon	dactylon (L.) Pers.	Poaceae	Nepal	whole plant	CE	Escherichia coli (extended-spectrum 𝛽-lactamase-producing)	-	MIC	250	µg/mL	Y	286	Cuts, wounds, indigestion, genitourinary disorders			X		X		X
Cynodon dactylon (L.) Pers.	Cynodon	dactylon (L.) Pers.	Poaceae	Nepal	whole plant	Fr.	Klebsiella pneumoniae (extended-spectrum 𝛽-lactamase-producing)	-	MIC	250	µg/mL	Y	286	Cuts, wounds, indigestion, genitourinary disorders			X		X		X
Cynodon dactylon (L.) Pers.	Cynodon	dactylon (L.) Pers.	Poaceae	Nepal	whole plant	CE	Staphylococcus aureus (MRSA)	+	MIC	391	µg/mL	Y	286	Cuts, wounds, indigestion, genitourinary disorders			X		X		X
Cynodon dactylon (L.) Pers.	Cynodon	dactylon (L.) Pers.	Poaceae	Nepal	whole plant	Fr.	Enterococcus faecalis	+	MIC	500	µg/mL	Y	286	Cuts, wounds, indigestion, genitourinary disorders			X		X		X
Cynodon dactylon (L.) Pers.	Cynodon	dactylon (L.) Pers.	Poaceae	Nepal	whole plant	Fr.	Salmonella typhimurium	-	MIC	500	µg/mL	Y	286	Cuts, wounds, indigestion, genitourinary disorders			X		X		X
Cynodon dactylon (L.) Pers.	Cynodon	dactylon (L.) Pers.	Poaceae	Nepal	whole plant	CA	Vibrio cholerae	-	MIC	500	µg/mL	Y	286	Cuts, wounds, indigestion, genitourinary disorders			X		X		X
Cynometra ramiflora L.	Cynometra	ramiflora L.	Fabaceae	Indonesia	leaf	CE	Bacillus subtilis	+	MIC	125	µg/mL	N	3	NS	X
Cynometra ramiflora L.	Cynometra	ramiflora L.	Fabaceae	Indonesia	leaf	CE	Escherichia coli	-	MIC	250	µg/mL	N	3	NS	X
Cyperus articulatus L.	Cyperus	articulatus L.	Cyperaceae	Brazil	bulb	EO	Fusobacterium nucleatum	-	MIC	250	µg/mL	N	66	antimicrobial activity against oral biofilms												X
Cyperus articulatus L.	Cyperus	articulatus L.	Cyperaceae	Brazil	bulb	EO	Porphyromonas gingivalis	-	MIC	250	µg/mL	N	66	antimicrobial activity against oral biofilms												X
Cyperus articulatus L.	Cyperus	articulatus L.	Cyperaceae	Brazil	bulb	EO	Streptococcus mitis	+	MIC	250	µg/mL	N	66	antimicrobial activity against oral biofilms												X
Cyperus articulatus L.	Cyperus	articulatus L.	Cyperaceae	Brazil	bulb	EO	Streptococcus sanguinis	+	MIC	250	µg/mL	N	66	antimicrobial activity against oral biofilms												X
Cyperus esculentus L.	Cyperus	esculentus L.	Cyperaceae	Cameroon	fruit	CM	Escherichia coli	-	MIC	256	µg/mL	N	400	NS	X
Cyperus rotundus L.	Cyperus	rotundus L.	Cyperaceae	Sudan	rhizome	EO	Staphylococcus aureus	+	MIC	16	µg/mL	N	468	stomach disorders, diarrhea, dyspepsia, dysentery, cholera, fevers					X	X
Cyperus rotundus L.	Cyperus	rotundus L.	Cyperaceae	Sudan	rhizome	EO	Bacillus subtilis	+	MIC	32	µg/mL	N	468	stomach disorders, diarrhea, dyspepsia, dysentery, cholera, fevers					X	X
Cyperus rotundus L.	Cyperus	rotundus L.	Cyperaceae	Sudan	rhizome	EO	Escherichia coli	-	MIC	32	µg/mL	N	468	stomach disorders, diarrhea, dyspepsia, dysentery, cholera, fevers					X	X
Cyperus rotundus L.	Cyperus	rotundus L.	Cyperaceae	Sudan	rhizome	EO	Pseudomonas aeruginosa	-	MIC	126	µg/mL	N	468	stomach disorders, diarrhea, dyspepsia, dysentery, cholera, fevers					X	X
Cytinus hypocistis (L.) L.	Cytinus	hypocistis (L.) L.	Cytinaceae	Italy	aerial part	CM	Staphylococcus aureus	+	IC50	1.04	µg/mL	N	284	NS	X
Cytinus hypocistis (L.) L.	Cytinus	hypocistis (L.) L.	Cytinaceae	Italy	aerial part	CM	Staphylococcus epidermidis	+	IC50	8	µg/mL	N	284	NS	X
Cytinus hypocistis (L.) L.	Cytinus	hypocistis (L.) L.	Cytinaceae	Italy	aerial part	CM	Klebsiella pneumoniae	-	IC50	28.5	µg/mL	N	284	NS	X
Cytinus hypocistis (L.) L.	Cytinus	hypocistis (L.) L.	Cytinaceae	Italy	aerial part	CM	Escherichia coli	-	IC50	75	µg/mL	N	284	NS	X
Dacryodes edulis (G.Don) H.J.Lam	Dacryodes	edulis (G.Don) H.J.Lam	Burseraceae	Cameroon	bark	CM	Enterobacter cloacae	-	MIC	128	µg/mL	N	326	NS	X
Dacryodes edulis (G.Don) H.J.Lam	Dacryodes	edulis (G.Don) H.J.Lam	Burseraceae	Cameroon	seed	CM	Enterobacter cloacae	-	MIC	128	µg/mL	N	326	NS	X
Dacryodes edulis (G.Don) H.J.Lam	Dacryodes	edulis (G.Don) H.J.Lam	Burseraceae	Cameroon	leaf	CM	Enterobacter cloacae	-	MIC	128	µg/mL	N	326	NS	X
Dacryodes edulis (G.Don) H.J.Lam	Dacryodes	edulis (G.Don) H.J.Lam	Burseraceae	Cameroon	leaf	CM	Enterobacter aerogenes	-	MIC	256	µg/mL	N	326	NS	X
Dacryodes edulis (G.Don) H.J.Lam	Dacryodes	edulis (G.Don) H.J.Lam	Burseraceae	Cameroon	seed	CM	Providencia stuartii	-	MIC	256	µg/mL	N	326	NS	X
Dacryodes edulis (G.Don) H.J.Lam	Dacryodes	edulis (G.Don) H.J.Lam	Burseraceae	Cameroon	seed	CM	Staphylococcus aureus	+	MIC	256	µg/mL	N	463	NS	X
Dacryodes edulis (G.Don) H.J.Lam	Dacryodes	edulis (G.Don) H.J.Lam	Burseraceae	Cameroon	seed	CM	Staphylococcus aureus (MRSA)	+	MIC	256	µg/mL	N	463	NS	X
Dacryodes edulis (G.Don) H.J.Lam	Dacryodes	edulis (G.Don) H.J.Lam	Burseraceae	Cameroon	bark	CM	Staphylococcus aureus (MRSA)	+	MIC	256	µg/mL	N	463	NS	X
Dacryodes edulis (G.Don) H.J.Lam	Dacryodes	edulis (G.Don) H.J.Lam	Burseraceae	Cameroon	leaf	CM	Staphylococcus aureus (MRSA)	+	MIC	256	µg/mL	N	463	NS	X
Dacryodes edulis (G.Don) H.J.Lam	Dacryodes	edulis (G.Don) H.J.Lam	Burseraceae	Cameroon	leaf	CM	Staphylococcus aureus (MSSA)	+	MIC	256	µg/mL	N	463	NS	X
Dalbergia latifolia Roxb.	Dalbergia	latifolia Roxb.	Fabaceae	Indonesia	leaf	CE	Bacillus subtilis	+	MIC	250	µg/mL	N	3	NS	X
Dalbergia latifolia Roxb.	Dalbergia	latifolia Roxb.	Fabaceae	Indonesia	leaf	CE	Escherichia coli	-	MIC	250	µg/mL	N	3	NS	X
Dalbergia obovata E.Mey.	Dalbergia	obovata E.Mey.	Fabaceae	South Africa	leaf	CM/Dichl (1:1)	Pseudomonas aeruginosa	-	MIC	156	µg/mL	N	327	NS	X
Dalbergia obovata E.Mey.	Dalbergia	obovata E.Mey.	Fabaceae	South Africa	leaf	CM/Dichl (1:1)	Brevibacterium agri	+	MIC	190	µg/mL	N	327	NS	X
Dalbergia obovata E.Mey.	Dalbergia	obovata E.Mey.	Fabaceae	South Africa	leaf	CM/Dichl (1:1)	Brevibacterium linens	+	MIC	500	µg/mL	N	327	NS	X
Daucus carota subsp. maximus (Desf.) Ball	Daucus	carota subsp. maximus (Desf.) Ball	Apiaceae	Italy	seed (green)	EO	Acinetobacter haemolyticus	-	MIC	1.25	μL/mL	N	171	NS	X
Daucus carota subsp. maximus (Desf.) Ball	Daucus	carota subsp. maximus (Desf.) Ball	Apiaceae	Italy	seed (green)	EO	Bacillus cereus	+	MIC	1.25	μL/mL	N	171	NS	X
Daucus carota subsp. maximus (Desf.) Ball	Daucus	carota subsp. maximus (Desf.) Ball	Apiaceae	Italy	seed (green)	EO	Staphylococcus warneri	+	MIC	1.25	μL/mL	N	171	NS	X
Daucus carota subsp. maximus (Desf.) Ball	Daucus	carota subsp. maximus (Desf.) Ball	Apiaceae	Italy	seed (green)	EO	Listeria monocytogenes	+	MIC	2.5	μL/mL	N	171	NS	X
Daucus littoralis Sm.	Daucus	littoralis Sm.	Apiaceae	Iran	aerial part	CM	Staphylococcus lugdunensis	+	MIC	312	µg/mL	N	4	antiseptic						X
Decaspermum fruticosum J.R.Forst. & G.Forst	Decaspermum	fruticosum J.R.Forst. & G.Forst	Myrtaceae	Indonesia	leaf	CE	Bacillus subtilis	+	MIC	125	µg/mL	N	3	NS	X
Decaspermum fruticosum J.R.Forst. & G.Forst	Decaspermum	fruticosum J.R.Forst. & G.Forst	Myrtaceae	Indonesia	leaf	CE	Escherichia coli	-	MIC	250	µg/mL	N	3	NS	X
Dennettia tripetala Baker f.	Dennettia	tripetala Baker f.	Annonaceae	Nigeria	fruit (ripe)	EO	Enterococcus faecium	+	MIC	50	µg/mL	N	347	condiment	X
Dennettia tripetala Baker f.	Dennettia	tripetala Baker f.	Annonaceae	Nigeria	fruit (ripe)	EO	Vibro spp.	-	MIC	50	µg/mL	N	347	condiment	X
Dennettia tripetala Baker f.	Dennettia	tripetala Baker f.	Annonaceae	Nigeria	fruit (ripe)	EO	Enterobacter cloacae	-	MIC	100	µg/mL	N	347	condiment	X
Dennettia tripetala Baker f.	Dennettia	tripetala Baker f.	Annonaceae	Nigeria	fruit (unripe)	EO	Enterobacter cloacae	-	MIC	100	µg/mL	N	347	condiment	X
Dennettia tripetala Baker f.	Dennettia	tripetala Baker f.	Annonaceae	Nigeria	fruit (unripe)	EO	Enterococcus faecium	+	MIC	100	µg/mL	N	347	condiment	X
Dennettia tripetala Baker f.	Dennettia	tripetala Baker f.	Annonaceae	Nigeria	fruit (ripe)	EO	Listeria ivanovii	+	MIC	100	µg/mL	N	347	condiment	X
Dennettia tripetala Baker f.	Dennettia	tripetala Baker f.	Annonaceae	Nigeria	fruit (ripe)	EO	Staphylococcus aureus	+	MIC	100	µg/mL	N	347	condiment	X
Dennettia tripetala Baker f.	Dennettia	tripetala Baker f.	Annonaceae	Nigeria	fruit (unripe)	EO	Vibro spp.	-	MIC	100	µg/mL	N	347	condiment	X
Dennettia tripetala Baker f.	Dennettia	tripetala Baker f.	Annonaceae	Nigeria	fruit (ripe)	EO	Escherichia coli	-	MIC	150	µg/mL	N	347	condiment	X
Dennettia tripetala Baker f.	Dennettia	tripetala Baker f.	Annonaceae	Nigeria	fruit (unripe)	EO	Listeria ivanovii	+	MIC	150	µg/mL	N	347	condiment	X
Dennettia tripetala Baker f.	Dennettia	tripetala Baker f.	Annonaceae	Nigeria	fruit (unripe)	EO	Staphylococcus aureus	+	MIC	150	µg/mL	N	347	condiment	X
Dennettia tripetala Baker f.	Dennettia	tripetala Baker f.	Annonaceae	Nigeria	fruit (unripe)	EO	Escherichia coli	-	MIC	200	µg/mL	N	347	condiment	X
Derris scandens (Roxb.) Benth.	Derris	scandens (Roxb.) Benth.	Fabaceae	Thailand	stem	NS	Streptococcus pyogenes	+	MIC	125	µg/mL	N	264	NS	X
Deverra denudata (Viv.) Pfisterer & Podlech	Deverra	denudata (Viv.) Pfisterer & Podlech	Apiaceae	Tunisia	aerial part	EO	Staphylococcus aureus (MRSA)	+	MIC	250	µg/mL	N	248	NS	X
Dianthus caryophyllus L.	Dianthus	caryophyllus L.	Caryophyllaceae	Iran	whole plant	EO	Escherichia coli	-	MIC	19.5	μL/mL	N	184	NS	X
Dichrostachys cinerea (L.) Wight & Arn.	Dichrostachys	cinerea (L.) Wight & Arn.	Fabaceae	South Africa	twig	CM/Dichl (1:1)	Pseudomonas aeruginosa	-	MIC	250	µg/mL	N	327	NS	X
Dicoma anomola Sond.	Dicoma	anomola Sond.	Asteraceae	South Africa	tuber	CDichl	Staphylococcus aureus	+	MIC	500	µg/mL	N	273	wounds, ulcers, ringworm, and head sores treatment			X		X	X
Dicoma anomola Sond.	Dicoma	anomola Sond.	Asteraceae	South Africa	tuber	CDichl	Staphylococcus aureus (GMRSA)	+	MIC	500	µg/mL	N	273	wounds, ulcers, ringworm, and head sores treatment			X		X	X
Dicoma anomola Sond.	Dicoma	anomola Sond.	Asteraceae	South Africa	tuber	CDichl	Staphylococcus aureus (MRSA)	+	MIC	500	µg/mL	N	273	wounds, ulcers, ringworm, and head sores treatment			X		X	X
Dicoma anomola Sond.	Dicoma	anomola Sond.	Asteraceae	South Africa	tuber	CDichl	Staphylococcus epidermidis	+	MIC	500	µg/mL	N	273	wounds, ulcers, ringworm, and head sores treatment			X		X	X
Dictamnus albus L.	Dictamnus	albus L.	Rutaceae	China	root	EO	Staphylococcus aureus	+	MIC	109	µg/mL	N	424	rheumatism, itching, jaundice, chronic hepatitis, skin diseases, and as anti-inflammatory agent			X		X	X			X
Dictamnus albus L.	Dictamnus	albus L.	Rutaceae	China	root	EO	Escherichia coli	-	MIC	225	µg/mL	N	424	rheumatism, itching, jaundice, chronic hepatitis, skin diseases, and as anti-inflammatory agent			X		X	X			X
Dillenia excelsa (Jack) Martelli ex Gilg.	Dillenia	excelsa (Jack) Martelli ex Gilg.	Dilleniaceae	Indonesia	leaf	CE	Escherichia coli	-	MIC	62.5	µg/mL	N	3	NS	X
Dillenia excelsa (Jack) Martelli ex Gilg.	Dillenia	excelsa (Jack) Martelli ex Gilg.	Dilleniaceae	Indonesia	leaf	CE	Bacillus subtilis	+	MIC	125	µg/mL	N	3	NS	X
Dimerostemma aspilioides (Griseb.) M.D.Moraes	Dimerostemma	aspilioides (Griseb.) M.D.Moraes	Asteraceae	Argentina	NS	CE	Staphylococcus aureus (MRSA)	+	MIC	500	µg/mL	N	91	NS	X
Dioscorea bulbifera L.	Dioscorea	bulbifera L.	Dioscoreaceae	Cameroon	bulb	Fr.	Escherichia coli	-	MIC	16	µg/mL	N	237	infections, conjunctivitis, diarrhea, dysentery				X	X		X
Dioscorea bulbifera L.	Dioscorea	bulbifera L.	Dioscoreaceae	Cameroon	bulb	Fr.	Mycobacterium tuberculosis	+	MIC	16	µg/mL	N	237	infections, conjunctivitis, diarrhea, dysentery				X	X		X
Dioscorea bulbifera L.	Dioscorea	bulbifera L.	Dioscoreaceae	Cameroon	bulb	Fr.	Enterobacter aerogenes	-	MIC	32	µg/mL	N	237	infections, conjunctivitis, diarrhea, dysentery				X	X		X
Dioscorea bulbifera L.	Dioscorea	bulbifera L.	Dioscoreaceae	Cameroon	bulb	Fr.	Klebsiella pneumoniae	-	MIC	32	µg/mL	N	237	infections, conjunctivitis, diarrhea, dysentery				X	X		X
Dioscorea bulbifera L.	Dioscorea	bulbifera L.	Dioscoreaceae	Cameroon	bulb	Fr.	Mycobacterium smegmatis	+	MIC	32	µg/mL	N	237	infections, conjunctivitis, diarrhea, dysentery				X	X		X
Dioscorea bulbifera L.	Dioscorea	bulbifera L.	Dioscoreaceae	Cameroon	bulb	Fr.	Pseudomonas aeruginosa	-	MIC	32	µg/mL	N	237	infections, conjunctivitis, diarrhea, dysentery				X	X		X
Dioscorea bulbifera L.	Dioscorea	bulbifera L.	Dioscoreaceae	Cameroon	bulb	CM	Enterobacter aerogenes	-	MIC	64	µg/mL	N	237	infections, conjunctivitis, diarrhea, dysentery				X	X		X
Dioscorea bulbifera L.	Dioscorea	bulbifera L.	Dioscoreaceae	Cameroon	bulb	CM	Escherichia coli	-	MIC	64	µg/mL	N	237	infections, conjunctivitis, diarrhea, dysentery				X	X		X
Dioscorea bulbifera L.	Dioscorea	bulbifera L.	Dioscoreaceae	Cameroon	bulb	CM	Klebsiella pneumoniae	-	MIC	64	µg/mL	N	237	infections, conjunctivitis, diarrhea, dysentery				X	X		X
Dioscorea bulbifera L.	Dioscorea	bulbifera L.	Dioscoreaceae	Cameroon	bulb	CM	Mycobacterium smegmatis	+	MIC	64	µg/mL	N	237	infections, conjunctivitis, diarrhea, dysentery				X	X		X
Dioscorea bulbifera L.	Dioscorea	bulbifera L.	Dioscoreaceae	Cameroon	bulb	CM	Mycobacterium tuberculosis	+	MIC	64	µg/mL	N	237	infections, conjunctivitis, diarrhea, dysentery				X	X		X
Dioscorea bulbifera L.	Dioscorea	bulbifera L.	Dioscoreaceae	Cameroon	bulb	CM	Pseudomonas aeruginosa	-	MIC	128	µg/mL	N	237	infections, conjunctivitis, diarrhea, dysentery				X	X		X
Dioscorea dregeana T. Durand & Schinz.	Dioscorea	dregeana T. Durand & Schinz.	Dioscoreaceae	South Africa	tuber	CDichl	Bacillus megaterium	+	MIC	250	µg/mL	N	273	treatment of cuts and sores			X
Diospyros anisandra S.F.Blake	Diospyros	anisandra S.F.Blake	Ebenaceae	Mexico	stem bark	CHex	Mycobacterium tuberculosis	+	MIC	3.13	µg/mL	N	445	NS	X
Diospyros anisandra S.F.Blake	Diospyros	anisandra S.F.Blake	Ebenaceae	Mexico	stem bark	CHex	Mycobacterium tuberculosis	+	MIC	6.25	µg/mL	N	445	NS	X
Diospyros bipindensis Gürke	Diospyros	bipindensis Gürke	Ebenaceae	Cameroon	bark	CHex	Streptococcus pyogenes	+	MIC	10	µg/mL	N	89	treatment of respiratory diseases													X
Diospyros bipindensis Gürke	Diospyros	bipindensis Gürke	Ebenaceae	Cameroon	bark	CEtOAc	Streptococcus pyogenes	+	MIC	20	µg/mL	N	89	treatment of respiratory diseases													X
Diospyros bipindensis Gürke	Diospyros	bipindensis Gürke	Ebenaceae	Cameroon	bark	CDichl	Staphylococcus aureus	+	MIC	30	µg/mL	N	89	treatment of respiratory diseases													X
Diospyros bipindensis Gürke	Diospyros	bipindensis Gürke	Ebenaceae	Cameroon	bark	CDichl	Streptococcus pneumoniae	+	MIC	30	µg/mL	N	89	treatment of respiratory diseases													X
Diospyros bipindensis Gürke	Diospyros	bipindensis Gürke	Ebenaceae	Cameroon	bark	CDichl	Streptococcus pyogenes	+	MIC	30	µg/mL	N	89	treatment of respiratory diseases													X
Diospyros bipindensis Gürke	Diospyros	bipindensis Gürke	Ebenaceae	Cameroon	bark	CHex	Staphylococcus aureus	+	MIC	70	µg/mL	N	89	treatment of respiratory diseases													X
Diospyros bipindensis Gürke	Diospyros	bipindensis Gürke	Ebenaceae	Cameroon	bark	CEtOAc	Staphylococcus aureus	+	MIC	70	µg/mL	N	89	treatment of respiratory diseases													X
Diospyros bipindensis Gürke	Diospyros	bipindensis Gürke	Ebenaceae	Cameroon	bark	CA	Streptococcus pneumoniae	+	MIC	70	µg/mL	N	89	treatment of respiratory diseases													X
Diospyros bipindensis Gürke	Diospyros	bipindensis Gürke	Ebenaceae	Cameroon	bark	CHex	Streptococcus pneumoniae	+	MIC	70	µg/mL	N	89	treatment of respiratory diseases													X
Diospyros bipindensis Gürke	Diospyros	bipindensis Gürke	Ebenaceae	Cameroon	bark	CEtOAc	Streptococcus pneumoniae	+	MIC	70	µg/mL	N	89	treatment of respiratory diseases													X
Diospyros bipindensis Gürke	Diospyros	bipindensis Gürke	Ebenaceae	Cameroon	bark	CA	Streptococcus pyogenes	+	MIC	70	µg/mL	N	89	treatment of respiratory diseases													X
Diospyros melanoxylon Roxb.	Diospyros	melanoxylon Roxb.	Ebenaceae	India	bark	CM	Bacillus cereus	+	MIC	130	µg/mL	N	358	NS	X
Diospyros melanoxylon Roxb.	Diospyros	melanoxylon Roxb.	Ebenaceae	India	bark	CM	Vibrio cholerae	-	MIC	170	µg/mL	N	358	NS	X
Diospyros melanoxylon Roxb.	Diospyros	melanoxylon Roxb.	Ebenaceae	India	bark	CM	Shigella flexneri	-	MIC	210	µg/mL	N	358	NS	X
Diospyros mespiliformis Hochst. ex A.DC.	Diospyros	mespiliformis Hochst. ex A.DC.	Ebenaceae	South Africa	leaf	CDichl	Cutibacterium acnes	+	MIC	50	µg/mL	N	273	skin rash and ringworm			X
Diospyros mespiliformis Hochst. ex A.DC.	Diospyros	mespiliformis Hochst. ex A.DC.	Ebenaceae	South Africa	leaf	CDichl	Bacillus megaterium	+	MIC	500	µg/mL	N	273	skin rash and ringworm			X
Dischistocalyx grandifolius C.B.Clarke	Dischistocalyx	grandifolius C.B.Clarke	Acanthaceae	Cameroon	whole plant	CM	Providencia stuartii	-	MIC	256	µg/mL	N	401	NS	X
Distephanus angulifolius (DC.) H.Rob. & B.Kahn	Distephanus	angulifolius (DC.) H.Rob. & B.Kahn	Asteraceae	South Africa	leaf	CDIchl	Staphylococcus aureus	+	MIC	160	µg/mL	N	102	inducing enemas, antimalarial properties				X	X		X
Dodonaea viscosa (L.) Jacq.	Dodonaea	viscosa (L.) Jacq.	Sapindaceae	Australia	leaf	CE	Campylobacter jejuni	-	MIC	256	µg/mL	N	243	NS	X
Dodonaea viscosa subsp. angustifolia (L.f.) J.G.West	Dodonaea	viscosa subsp. angustifolia (L.f.) J.G.West	Sapindaceae	South Africa	leaf	CA	Staphylococcus aureus	+	MIC	500	µg/mL	N	273	treatment for boil			X
Dodonaea viscosa subsp. angustifolia (L.f.) J.G.West	Dodonaea	viscosa subsp. angustifolia (L.f.) J.G.West	Sapindaceae	South Africa	leaf	CDichl	Staphylococcus aureus (MRSA)	+	MIC	500	µg/mL	N	273	treatment for boil			X
Dodonaea viscosa subsp. angustifolia (L.f.) J.G.West	Dodonaea	viscosa subsp. angustifolia (L.f.) J.G.West	Sapindaceae	South Africa	leaf	Fr.	Streptococcus mutans	+	MIC	100	µg/mL	N	331	NS	X
Dodonaea viscosa subsp. angustifolia (L.f.) J.G.West	Dodonaea	viscosa subsp. angustifolia (L.f.) J.G.West	Sapindaceae	South Africa	leaf	Fr.	Streptococcus mutans	+	MIC	390	µg/mL	N	331	NS	X
Doliocarpus dentatus (Aubl.) Standl.	Doliocarpus	dentatus (Aubl.) Standl.	Dilleniaceae	Brazil	leaf	CE	Mycobacterium tuberculosis	+	MIC	62.5	µg/mL	N	209	treats cystitis and inflamation			X			X
Dombeya rotundifolia (Hochst.) Planch.	Dombeya	rotundifolia (Hochst.) Planch.	Malvaceae	South Africa	leaf	CM	Staphylococcus aureus	+	MIC	39	µg/mL	N	31	NS	X
Dorema ammoniacum D.Don	Dorema	ammoniacum D.Don	Apiaceae	Iran	seed	CM	Staphylococcus aureus	+	MIC	78	µg/mL	N	4	respiratory infections													X
Dorema ammoniacum D.Don	Dorema	ammoniacum D.Don	Apiaceae	Iran	seed	CM	Staphylococcus lugdunensis	+	MIC	78	µg/mL	N	4	respiratory infections													X
Dorema ammoniacum D.Don	Dorema	ammoniacum D.Don	Apiaceae	Iran	seed	CM	Corynebacterium striatum	+	MIC	156	µg/mL	N	4	respiratory infections													X
Dorema ammoniacum D.Don	Dorema	ammoniacum D.Don	Apiaceae	Iran	seed	CM	Staphylococcus warneri	+	MIC	156	µg/mL	N	4	respiratory infections													X
Dorema ammoniacum D.Don	Dorema	ammoniacum D.Don	Apiaceae	Iran	seed	CM	Enterococcus faecalis	+	MIC	312	µg/mL	N	4	respiratory infections													X
Dorema ammoniacum D.Don	Dorema	ammoniacum D.Don	Apiaceae	Iran	seed	CM	Mycobacterium smegmatis	+	MIC	312	µg/mL	N	4	respiratory infections													X
Dorema ammoniacum D.Don	Dorema	ammoniacum D.Don	Apiaceae	Iran	seed	CM	Staphylococcus epidermidis	+	MIC	312	µg/mL	N	4	respiratory infections													X
Dorema ammoniacum D.Don	Dorema	ammoniacum D.Don	Apiaceae	Iran	seed	CM	Stenotrophomonas maltophilia	-	MIC	312	µg/mL	N	4	respiratory infections													X
Dorycnium hirsutum (L.) Ser.	Dorycnium	hirsutum (L.) Ser.	Fabaceae	Australia	leaf	CE	Campylobacter jejuni	-	MIC	64	µg/mL	N	243	NS	X
Dorycnium hirsutum (L.) Ser.	Dorycnium	hirsutum (L.) Ser.	Fabaceae	Australia	leaf	CE	Campylobacter coli	-	MIC	256	µg/mL	N	243	NS	X
Dracocephalum moldavica L.	Dracocephalum	moldavica L.	Lamiaceae	Iran	aerial part	EO	Staphylococcus aureus	+	MIC	120	µg/mL	N	147	liver and stomach disorders, headaches and congestion					X					X			X
Drimys brasiliensis subsp. sylvatica (A.St.-Hil.) Ehrend., Silberb.-Gottsb. & Gottsb.	Drimys	brasiliensis subsp. sylvatica (A.St.-Hil.) Ehrend., Silberb.-Gottsb. & Gottsb.	Winteraceae	Brazil	bark	CChl	Bacillus cereus	+	MIC	62.5	µg/mL	N	414	ulcers, respiratory infections, anti-inflammatory, analgesic, anti-neoplastic					X	X				X			X
Drimys brasiliensis subsp. sylvatica (A.St.-Hil.) Ehrend., Silberb.-Gottsb. & Gottsb.	Drimys	brasiliensis subsp. sylvatica (A.St.-Hil.) Ehrend., Silberb.-Gottsb. & Gottsb.	Winteraceae	Brazil	bark	CChl	Listeria monocytogenes	+	MIC	250	µg/mL	N	414	ulcers, respiratory infections, anti-inflammatory, analgesic, anti-neoplastic					X	X				X			X
Drimys brasiliensis subsp. sylvatica (A.St.-Hil.) Ehrend., Silberb.-Gottsb. & Gottsb.	Drimys	brasiliensis subsp. sylvatica (A.St.-Hil.) Ehrend., Silberb.-Gottsb. & Gottsb.	Winteraceae	Brazil	bark	CChl	Staphylococcus aureus	+	MIC	250	µg/mL	N	414	ulcers, respiratory infections, anti-inflammatory, analgesic, anti-neoplastic					X	X				X			X
Drimys brasiliensis subsp. sylvatica (A.St.-Hil.) Ehrend., Silberb.-Gottsb. & Gottsb.	Drimys	brasiliensis subsp. sylvatica (A.St.-Hil.) Ehrend., Silberb.-Gottsb. & Gottsb.	Winteraceae	Brazil	bark	CChl	Enterococcus faecalis	+	MIC	500	µg/mL	N	414	ulcers, respiratory infections, anti-inflammatory, analgesic, anti-neoplastic					X	X				X			X
Drimys brasiliensis subsp. sylvatica (A.St.-Hil.) Ehrend., Silberb.-Gottsb. & Gottsb.	Drimys	brasiliensis subsp. sylvatica (A.St.-Hil.) Ehrend., Silberb.-Gottsb. & Gottsb.	Winteraceae	Brazil	bark	CChl	Staphylococcus saprophyticus	+	MIC	500	µg/mL	N	414	ulcers, respiratory infections, anti-inflammatory, analgesic, anti-neoplastic					X	X				X			X
Drimys brasiliensis subsp. sylvatica (A.St.-Hil.) Ehrend., Silberb.-Gottsb. & Gottsb.	Drimys	brasiliensis subsp. sylvatica (A.St.-Hil.) Ehrend., Silberb.-Gottsb. & Gottsb.	Winteraceae	Brazil	bark	CChl	Streptococcus pneumoniae	+	MIC	500	µg/mL	N	414	ulcers, respiratory infections, anti-inflammatory, analgesic, anti-neoplastic					X	X				X			X
Drosera spatulata Labill.	Drosera	spatulata Labill.	Droseraceae	India	flower	CE	Staphylococcus aureus	+	MIC	300	µg/mL	N	134	various infectious diseases						X
Drosera spatulata Labill.	Drosera	spatulata Labill.	Droseraceae	India	flower	CE	Streptococcus pneumoniae	+	MIC	350	µg/mL	N	134	various infectious diseases						X
Drosera spatulata Labill.	Drosera	spatulata Labill.	Droseraceae	India	flower	CE	Klebsiella pneumoniae	-	MIC	450	µg/mL	N	134	various infectious diseases						X
Dryopteris sermatica O. Kze.	Dryopteris	sermatica O. Kze.	Polypodiaceae	Thailand	wood	NS	Streptococcus pyogenes	+	MIC	125	µg/mL	N	264	NS	X
Drypetes staudtii (Pax) Hutch.	Drypetes	staudtii (Pax) Hutch.	Putranjivaceae	Nigeria	stem, bark	CM	Staphylococcus aureus	+	MIC	64	µg/mL	N	189	Sinusitis, gonorrhea, dysentery, wounds			X		X			X					X
Drypetes staudtii (Pax) Hutch.	Drypetes	staudtii (Pax) Hutch.	Putranjivaceae	Nigeria	stem, bark	CM	Streptococcus agalactiae	+	MIC	64	µg/mL	N	189	Sinusitis, gonorrhea, dysentery, wounds			X		X			X					X
Drypetes staudtii (Pax) Hutch.	Drypetes	staudtii (Pax) Hutch.	Putranjivaceae	Nigeria	stem, bark	CM	Escherichia coli	-	MIC	128	µg/mL	N	189	Sinusitis, gonorrhea, dysentery, wounds			X		X			X					X
Drypetes staudtii (Pax) Hutch.	Drypetes	staudtii (Pax) Hutch.	Putranjivaceae	Nigeria	stem, bark	CM	Pseudomonas aeruginosa	-	MIC	128	µg/mL	N	189	Sinusitis, gonorrhea, dysentery, wounds			X		X			X					X
Duboisia hopwoodii (F.Muell.) F.Muell.	Duboisia	hopwoodii (F.Muell.) F.Muell.	Solanaceae	Australia	leaf	CE	Campylobacter jejuni	-	MIC	256	µg/mL	N	243	NS	X
Duranta erecta L.	Duranta	erecta L.	Verbenaceae	Egypt	leaf	CChl	Pectobacterium atrosepticum	-	MIC	128	µg/mL	N	41	NS	X
Duranta erecta L.	Duranta	erecta L.	Verbenaceae	Egypt	leaf	CChl	Pectobacterium carotovorum	-	MIC	128	µg/mL	N	41	NS	X
Duranta erecta L.	Duranta	erecta L.	Verbenaceae	Egypt	leaf	CChl	Escherichia coli	-	MIC	500	µg/mL	N	41	NS	X
Dysphania ambrosioides (L.) Mosyakin & Clemants	Dysphania	ambrosioides (L.) Mosyakin & Clemants	Amaranthaceae	South Africa	leaf	CDichl	Pseudomonas aeruginosa	-	MIC	250	µg/mL	N	273	treatment of eczema, wounds, and plant infections			X
Dysphania ambrosioides (L.) Mosyakin & Clemants	Dysphania	ambrosioides (L.) Mosyakin & Clemants	Amaranthaceae	South Africa	leaf	CDichl	Staphylococcus aureus (MRSA)	+	MIC	250	µg/mL	N	273	treatment of eczema, wounds, and plant infections			X
Dysphania ambrosioides (L.) Mosyakin & Clemants	Dysphania	ambrosioides (L.) Mosyakin & Clemants	Amaranthaceae	South Africa	leaf	CDichl	Cutibacterium acnes	+	MIC	400	µg/mL	N	273	treatment of eczema, wounds, and plant infections			X
Dysphania ambrosioides (L.) Mosyakin & Clemants	Dysphania	ambrosioides (L.) Mosyakin & Clemants	Amaranthaceae	South Africa	leaf	CDichl	Brevibacterium agri	+	MIC	500	µg/mL	N	273	treatment of eczema, wounds, and plant infections			X
Dysphania ambrosioides (L.) Mosyakin & Clemants	Dysphania	ambrosioides (L.) Mosyakin & Clemants	Amaranthaceae	South Africa	leaf	CDichl	Staphylococcus aureus (GMRSA)	+	MIC	500	µg/mL	N	273	treatment of eczema, wounds, and plant infections			X
Dysphania ambrosioides (L.) Mosyakin & Clemants	Dysphania	ambrosioides (L.) Mosyakin & Clemants	Amaranthaceae	South Africa	leaf	CDichl	Staphylococcus epidermidis	+	MIC	500	µg/mL	N	273	treatment of eczema, wounds, and plant infections			X
Dysphania ambrosioides (L.) Mosyakin & Clemants	Dysphania	ambrosioides (L.) Mosyakin & Clemants	Amaranthaceae	Portugal	aerial part	CM	Staphylococcus aureus	+	MIC	31	µg/mL	N	278	fever, abscess, leprosy			X			X
Dysphania ambrosioides (L.) Mosyakin & Clemants	Dysphania	ambrosioides (L.) Mosyakin & Clemants	Amaranthaceae	Portugal	aerial part	CDichl	Klebsiella pneumoniae	-	MIC	125	µg/mL	N	278	fever, abscess, leprosy			X			X
Dysphania ambrosioides (L.) Mosyakin & Clemants	Dysphania	ambrosioides (L.) Mosyakin & Clemants	Amaranthaceae	Portugal	aerial part	CDichl	Pseudomonas aeruginosa	-	MIC	125	µg/mL	N	278	fever, abscess, leprosy			X			X
Dysphania ambrosioides (L.) Mosyakin & Clemants	Dysphania	ambrosioides (L.) Mosyakin & Clemants	Amaranthaceae	Portugal	aerial part	CEtOAc	Pseudomonas aeruginosa	-	MIC	125	µg/mL	N	278	fever, abscess, leprosy			X			X
Dysphania ambrosioides (L.) Mosyakin & Clemants	Dysphania	ambrosioides (L.) Mosyakin & Clemants	Amaranthaceae	Portugal	aerial part	CHex	Staphylococcus aureus	+	MIC	125	µg/mL	N	278	fever, abscess, leprosy			X			X
Dysphania ambrosioides (L.) Mosyakin & Clemants	Dysphania	ambrosioides (L.) Mosyakin & Clemants	Amaranthaceae	Portugal	aerial part	CDichl	Staphylococcus aureus	+	MIC	125	µg/mL	N	278	fever, abscess, leprosy			X			X
Dysphania ambrosioides (L.) Mosyakin & Clemants	Dysphania	ambrosioides (L.) Mosyakin & Clemants	Amaranthaceae	Portugal	aerial part	CEtOAc	Staphylococcus aureus	+	MIC	250	µg/mL	N	278	fever, abscess, leprosy			X			X
Dysphania ambrosioides (L.) Mosyakin & Clemants	Dysphania	ambrosioides (L.) Mosyakin & Clemants	Amaranthaceae	South Africa	whole plant	CM/Dichl (1:1)	Proteus vulgaris	-	MIC	250	µg/mL	N	452	diarrhea					X
Dysphania ambrosioides (L.) Mosyakin & Clemants	Dysphania	ambrosioides (L.) Mosyakin & Clemants	Amaranthaceae	South Africa	whole plant	CM/Dichl (1:1)	Staphylococcus aureus	+	MIC	250	µg/mL	N	452	diarrhea					X
Dysphania ambrosioides (L.) Mosyakin & Clemants	Dysphania	ambrosioides (L.) Mosyakin & Clemants	Amaranthaceae	South Africa	whole plant	CM/Dichl (1:1)	Shigella flexneri	-	MIC	500	µg/mL	N	452	diarrhea					X
Echinacea purpurea (L.) Moench	Echinacea	purpurea (L.) Moench	Asteraceae	Canada	flower	CE	Streptococcus pyogenes	+	MIC	62.5	µg/mL	Y	466	NS	X
Echinacea purpurea (L.) Moench	Echinacea	purpurea (L.) Moench	Asteraceae	Canada	stem	CE	Streptococcus pyogenes	+	MIC	62.5	µg/mL	Y	466	NS	X
Echinophora platyloba DC.	Echinophora	platyloba DC.	Apiaceae	Iran	aerial part	EO	Listeria monocytogenes	+	MIC	336	µg/mL	N	383	NS	X
Echinophora platyloba DC.	Echinophora	platyloba DC.	Apiaceae	Iran	aerial part	EO	Staphylococcus aureus	+	MIC	448	µg/mL	N	383	NS	X
Echinophora platyloba DC.	Echinophora	platyloba DC.	Apiaceae	Iran	aerial part	EO	Escherichia coli	-	MIC	250	µg/mL	N	405	NS	X
Echinops giganteus A.Rich.	Echinops	giganteus A.Rich.	Asteraceae	Cameroon	root	CM	Mycobacterium tuberculosis	+	MIC	16	µg/mL	N	435	stomachache, carminative, reduces effects of alcohol, reduces asthma attacks, treats heart and gastric troubles		X			X	X							X
Echinops kebericho Mesfin	Echinops	kebericho Mesfin	Asteraceae	Ethiopia	root	CE	Staphylococcus aureus	+	MIC	3.12	µg/mL	N	29	fever, headache, stomachache, malaria, cough					X	X				X			X
Echinops kebericho Mesfin	Echinops	kebericho Mesfin	Asteraceae	Ethiopia	root	CM	Staphylococcus aureus	+	MIC	3.12	µg/mL	N	29	fever, headache, stomachache, malaria, cough					X	X				X			X
Echinops kebericho Mesfin	Echinops	kebericho Mesfin	Asteraceae	Ethiopia	root	CE	Enterococcus faecalis	+	MIC	12.5	µg/mL	N	29	fever, headache, stomachache, malaria, cough					X	X				X			X
Echinops kebericho Mesfin	Echinops	kebericho Mesfin	Asteraceae	Ethiopia	root	CM	Enterococcus faecalis	+	MIC	12.5	µg/mL	N	29	fever, headache, stomachache, malaria, cough					X	X				X			X
Echinops kebericho Mesfin	Echinops	kebericho Mesfin	Asteraceae	Ethiopia	root	CE	Escherichia coli	-	MIC	25	µg/mL	N	29	fever, headache, stomachache, malaria, cough					X	X				X			X
Echinops kebericho Mesfin	Echinops	kebericho Mesfin	Asteraceae	Ethiopia	root	CM	Escherichia coli	-	MIC	25	µg/mL	N	29	fever, headache, stomachache, malaria, cough					X	X				X			X
Echinops spinosissimus Turra	Echinops	spinosissimus Turra	Asteraceae	Tunisia	flower head	CHex	Bacillus subtilis	+	MIC	125	µg/mL	N	73	splenic diseases and sore throat migraine, diarrhea, heart pain, infections, intestinal worm infestation and hemorrhoids		X			X	X				X			X
Echinops spinosissimus Turra	Echinops	spinosissimus Turra	Asteraceae	Tunisia	flower head	CHex	Staphylococcus aureus	+	MIC	125	µg/mL	N	73	splenic diseases and sore throat migraine, diarrhea, heart pain, infections, intestinal worm infestation and hemorrhoids		X			X	X				X			X
Echinops spinosissimus Turra	Echinops	spinosissimus Turra	Asteraceae	Tunisia	flower head	CHex	Bacillus subtilis	+	MIC	250	µg/mL	N	73	splenic diseases and sore throat migraine, diarrhea, heart pain, infections, intestinal worm infestation and hemorrhoids		X			X	X				X			X
Echinops spinosissimus Turra	Echinops	spinosissimus Turra	Asteraceae	Tunisia	flower head	CHex	Micrococcus luteus	+	MIC	250	µg/mL	N	73	splenic diseases and sore throat migraine, diarrhea, heart pain, infections, intestinal worm infestation and hemorrhoids		X			X	X				X			X
Echinops spinosissimus Turra	Echinops	spinosissimus Turra	Asteraceae	Tunisia	flower head	CHex	Pseudomonas aeruginosa	-	MIC	500	µg/mL	N	73	splenic diseases and sore throat migraine, diarrhea, heart pain, infections, intestinal worm infestation and hemorrhoids		X			X	X				X			X
Echinops spinosissimus Turra	Echinops	spinosissimus Turra	Asteraceae	Tunisia	flower head	CHex	Salmonella enterica	-	MIC	500	µg/mL	N	73	splenic diseases and sore throat migraine, diarrhea, heart pain, infections, intestinal worm infestation and hemorrhoids		X			X	X				X			X
Echinops spinosissimus Turra subsp. spinosus	Echinops	spinosissimus Turra subsp. spinosus	Asteraceae	Tunisia	flower head	CHex	Escherichia coli	-	MIC	500	µg/mL	N	73	splenic diseases and sore throat migraine, diarrhea, heart pain, infections, intestinal worm infestation and hemorrhoids		X			X	X				X			X
Ekebergia capensis Sparrm.	Ekebergia	capensis Sparrm.	Meliaceae	Kenya	stem bark	CM/Dichl (1:1)	Mycoplasma mycoides	-	MIC	130	µg/mL	N	220	Livestock respiratory diseases	X
Ekebergia capensis Sparrm.	Ekebergia	capensis Sparrm.	Meliaceae	South Africa	bark	CDichl	Staphylococcus epidermidis	+	MIC	380	µg/mL	N	273	abcesses, boils, and acne			X
Ekebergia capensis Sparrm.	Ekebergia	capensis Sparrm.	Meliaceae	South Africa	leaf	CDichl	Staphylococcus aureus	+	MIC	500	µg/mL	N	273	abcesses, boils, and acne			X
Ekebergia capensis Sparrm.	Ekebergia	capensis Sparrm.	Meliaceae	South Africa	leaf	CDichl	Staphylococcus aureus (GMRSA)	+	MIC	500	µg/mL	N	273	abcesses, boils, and acne			X
Ekebergia capensis Sparrm.	Ekebergia	capensis Sparrm.	Meliaceae	South Africa	leaf	CDichl	Staphylococcus epidermidis	+	MIC	500	µg/mL	N	273	abcesses, boils, and acne			X
Elaeagnus rhamnoides (L.) A.Nelson	Elaeagnus	rhamnoides (L.) A.Nelson	Elaeagnaceae	China	fruit (pulp)	EO	Bacillus coagulans	+	MIC	100	µg/mL	Y	473	antioxidant, antitumor, immunomodulatory						X
Elaeagnus rhamnoides (L.) A.Nelson	Elaeagnus	rhamnoides (L.) A.Nelson	Elaeagnaceae	China	fruit (pulp)	EO	Bacillus subtilis	+	MIC	190	µg/mL	Y	473	antioxidant, antitumor, immunomodulatory						X
Elaeocarpus glaber Blume	Elaeocarpus	glaber Blume	Elaeocarpaceae	Indonesia	leaf	CE	Bacillus subtilis	+	MIC	62.5	µg/mL	N	3	NS	X
Elaeocarpus glaber Blume	Elaeocarpus	glaber Blume	Elaeocarpaceae	Indonesia	leaf	CE	Escherichia coli	-	MIC	250	µg/mL	N	3	NS	X
Elephantopus scaber L.	Elephantopus	scaber L.	Asteraceae	India	leaf	CM	Bacillus cereus	+	MIC	250	µg/mL	N	358	NS	X
Elephantopus scaber L.	Elephantopus	scaber L.	Asteraceae	India	leaf	CM	Vibrio cholerae	-	MIC	250	µg/mL	N	358	NS	X
Elephantorrhiza burkei Benth.	Elephantorrhiza	burkei Benth.	Fabaceae	South Africa	NS	CAcet	Staphylococcus aureus	+	MIC	195	µg/mL	N	277	diarrhea, dysentery, intestinal disorders, perforated peptic ulcers, abdominal pains, coughs, fever, chest complaints, pneumonia, haemorrhoids, dysmenorrhoea, syphilis, infertility, human immunodeficiency virus and acquired immunodeficiency syndrome (HIV and AIDS), hypertension, anaemia, and weakness		X			X	X	X	X	X				X
Elephantorrhiza burkei Benth.	Elephantorrhiza	burkei Benth.	Fabaceae	South Africa	NS	CAcet	Shigella flexneri	-	MIC	196	µg/mL	N	277	diarrhea, dysentery, intestinal disorders, perforated peptic ulcers, abdominal pains, coughs, fever, chest complaints, pneumonia, haemorrhoids, dysmenorrhoea, syphilis, infertility, human immunodeficiency virus and acquired immunodeficiency syndrome (HIV and AIDS), hypertension, anaemia, and weakness		X			X	X	X	X	X				X
Elephantorrhiza burkei Benth.	Elephantorrhiza	burkei Benth.	Fabaceae	South Africa	NS	CAcet	Campylobacter jejuni	-	MIC	390	µg/mL	N	277	diarrhea, dysentery, intestinal disorders, perforated peptic ulcers, abdominal pains, coughs, fever, chest complaints, pneumonia, haemorrhoids, dysmenorrhoea, syphilis, infertility, human immunodeficiency virus and acquired immunodeficiency syndrome (HIV and AIDS), hypertension, anaemia, and weakness		X			X	X	X	X	X				X
Elephantorrhiza burkei Benth.	Elephantorrhiza	burkei Benth.	Fabaceae	South Africa	NS	CAcet	Escherichia coli	-	MIC	390	µg/mL	N	277	diarrhea, dysentery, intestinal disorders, perforated peptic ulcers, abdominal pains, coughs, fever, chest complaints, pneumonia, haemorrhoids, dysmenorrhoea, syphilis, infertility, human immunodeficiency virus and acquired immunodeficiency syndrome (HIV and AIDS), hypertension, anaemia, and weakness		X			X	X	X	X	X				X
Elephantorrhiza elephantina (Burch.) Skeels	Elephantorrhiza	elephantina (Burch.) Skeels	Fabaceae	South Africa	root, rhizome	CDichl	Cutibacterium acnes	+	MIC	50	µg/mL	N	273	treat acne and other skin diseases			X
Elephantorrhiza elephantina (Burch.) Skeels	Elephantorrhiza	elephantina (Burch.) Skeels	Fabaceae	South Africa	leaf	CDichl	Staphylococcus epidermidis	+	MIC	380	µg/mL	N	273	treat acne and other skin diseases			X
Elephantorrhiza elephantina (Burch.) Skeels	Elephantorrhiza	elephantina (Burch.) Skeels	Fabaceae	South Africa	root, rhizome	CDichl	Bacillus megaterium	+	MIC	500	µg/mL	N	273	treat acne and other skin diseases			X
Elephantorrhiza elephantina (Burch.) Skeels	Elephantorrhiza	elephantina (Burch.) Skeels	Fabaceae	South Africa	root, rhizome	CA	Bacillus megaterium	+	MIC	500	µg/mL	N	273	treat acne and other skin diseases			X
Elephantorrhiza elephantina (Burch.) Skeels	Elephantorrhiza	elephantina (Burch.) Skeels	Fabaceae	South Africa	leaf	CDichl	Staphylococcus aureus	+	MIC	500	µg/mL	N	273	treat acne and other skin diseases			X
Elephantorrhiza elephantina (Burch.) Skeels	Elephantorrhiza	elephantina (Burch.) Skeels	Fabaceae	South Africa	root, rhizome	CDichl	Staphylococcus aureus	+	MIC	500	µg/mL	N	273	treat acne and other skin diseases			X
Elephantorrhiza elephantina (Burch.) Skeels	Elephantorrhiza	elephantina (Burch.) Skeels	Fabaceae	South Africa	leaf	CDichl	Staphylococcus aureus (GMRSA)	+	MIC	500	µg/mL	N	273	treat acne and other skin diseases			X
Elephantorrhiza elephantina (Burch.) Skeels	Elephantorrhiza	elephantina (Burch.) Skeels	Fabaceae	South Africa	root, rhizome	CDichl	Staphylococcus aureus (GMRSA)	+	MIC	500	µg/mL	N	273	treat acne and other skin diseases			X
Elephantorrhiza elephantina (Burch.) Skeels	Elephantorrhiza	elephantina (Burch.) Skeels	Fabaceae	South Africa	root, rhizome	CDichl	Staphylococcus aureus (MRSA)	+	MIC	500	µg/mL	N	273	treat acne and other skin diseases			X
Eleutherine bulbosa (Mill.) Urb.	Eleutherine	bulbosa (Mill.) Urb.	Iridaceae	Thailand	bulb	NS	Streptococcus pyogenes	+	MIC	170	µg/mL	N	264	NS	X
Eleutherine bulbosa (Mill.) Urb.	Eleutherine	bulbosa (Mill.) Urb.	Iridaceae	India	bulb	CM	Bacillus cereus	+	MIC	22	µg/mL	N	358	NS	X
Eleutherine bulbosa (Mill.) Urb.	Eleutherine	bulbosa (Mill.) Urb.	Iridaceae	India	bulb	CM	Staphylococcus aureus	+	MIC	62	µg/mL	N	358	NS	X
Eleutherine bulbosa (Mill.) Urb.	Eleutherine	bulbosa (Mill.) Urb.	Iridaceae	India	bulb	CM	Shigella flexneri	-	MIC	125	µg/mL	N	358	NS	X
Eleutherine bulbosa (Mill.) Urb.	Eleutherine	bulbosa (Mill.) Urb.	Iridaceae	India	bulb	CM	Vibrio cholerae	-	MIC	125	µg/mL	N	358	NS	X
Eleutherine bulbosa (Mill.) Urb.	Eleutherine	bulbosa (Mill.) Urb.	Iridaceae	Thailand	bulb	CE	Staphylococcus aureus	+	MIC	250	µg/mL	N	365	NS	X
Elionurus muticus (Spreng.) Kuntze	Elionurus	muticus (Spreng.) Kuntze	Poaceae	Brazil	leaf	EO	Fusobacterium nucleatum	-	MIC	250	µg/mL	N	66	antimicrobial activity against oral biofilms												X
Elionurus muticus (Spreng.) Kuntze	Elionurus	muticus (Spreng.) Kuntze	Poaceae	Brazil	leaf	EO	Porphyromonas gingivalis	-	MIC	250	µg/mL	N	66	antimicrobial activity against oral biofilms												X
Elionurus muticus (Spreng.) Kuntze	Elionurus	muticus (Spreng.) Kuntze	Poaceae	Brazil	leaf	EO	Streptococcus mitis	+	MIC	500	µg/mL	N	66	antimicrobial activity against oral biofilms												X
Elionurus muticus (Spreng.) Kuntze	Elionurus	muticus (Spreng.) Kuntze	Poaceae	Brazil	leaf	EO	Streptococcus sanguinis	+	MIC	500	µg/mL	N	66	antimicrobial activity against oral biofilms												X
Embelia ruminata (E.Mey. ex A.DC.) Mez	Embelia	ruminata (E.Mey. ex A.DC.) Mez	Primulaceae	South Africa	leaf	CA	Staphylococcus aureus (GMRSA)	+	MIC	250	µg/mL	N	273	treat open wounds and leprosy			X
Embelia ruminata (E.Mey. ex A.DC.) Mez	Embelia	ruminata (E.Mey. ex A.DC.) Mez	Primulaceae	South Africa	leaf	CDichl	Staphylococcus epidermidis	+	MIC	380	µg/mL	N	273	treat open wounds and leprosy			X
Embelia schimperi Vatke	Embelia	schimperi Vatke	Primulaceae	Ethiopia	leaf, twig	CE	Bacillus cereus	+	MIC	64	µg/mL	N	272	Taeniasis, diarrhea, ascariasis, constipation, Tape worm, and leprosy			X		X
Embelia schimperi Vatke	Embelia	schimperi Vatke	Primulaceae	Ethiopia	leaf, twig	CE	Listeria monocytogenes	+	MIC	64	µg/mL	N	272	Taeniasis, diarrhea, ascariasis, constipation, Tape worm, and leprosy			X		X
Embelia schimperi Vatke	Embelia	schimperi Vatke	Primulaceae	Ethiopia	leaf, twig	CE	Streptococcus pyogenes	+	MIC	64	µg/mL	N	272	Taeniasis, diarrhea, ascariasis, constipation, Tape worm, and leprosy			X		X
Embelia schimperi Vatke	Embelia	schimperi Vatke	Primulaceae	Ethiopia	seed, fruit	CE	Bacillus cereus	+	MIC	128	µg/mL	N	272	Taeniasis, diarrhea, ascariasis, constipation, Tape worm, and leprosy			X		X
Embelia schimperi Vatke	Embelia	schimperi Vatke	Primulaceae	Ethiopia	seed, fruit	CE	Streptococcus pyogenes	+	MIC	128	µg/mL	N	272	Taeniasis, diarrhea, ascariasis, constipation, Tape worm, and leprosy			X		X
Embelia schimperi Vatke	Embelia	schimperi Vatke	Primulaceae	Ethiopia	seed, fruit	CE	Listeria monocytogenes	+	MIC	256	µg/mL	N	272	Taeniasis, diarrhea, ascariasis, constipation, Tape worm, and leprosy			X		X
Embelia schimperi Vatke	Embelia	schimperi Vatke	Primulaceae	Ethiopia	leaf, twig	CE	Staphylococcus epidermidis	+	MIC	256	µg/mL	N	272	Taeniasis, diarrhea, ascariasis, constipation, Tape worm, and leprosy			X		X
Embelia schimperi Vatke	Embelia	schimperi Vatke	Primulaceae	Ethiopia	leaf, twig	CE	Staphylococcus aureus (MRSA)	+	MIC	128	µg/mL	Y	379	antibacterial, anthelmintic					X	X
Embelia schimperi Vatke	Embelia	schimperi Vatke	Primulaceae	Ethiopia	leaf, twig	CE	Staphylococcus aureus (Tetracycline-R)	+	MIC	128	µg/mL	Y	379	antibacterial, anthelmintic					X	X
Embelia schimperi Vatke	Embelia	schimperi Vatke	Primulaceae	Ethiopia	leaf, twig	CE	Staphylococcus aureus (Tetracycline-R)	+	MIC	170.67	µg/mL	Y	379	antibacterial, anthelmintic					X	X
Embelia schimperi Vatke	Embelia	schimperi Vatke	Primulaceae	Ethiopia	leaf, twig	CE	Staphylococcus aureus	+	MIC	256	µg/mL	Y	379	antibacterial, anthelmintic					X	X
Embelia schimperi Vatke	Embelia	schimperi Vatke	Primulaceae	Ethiopia	leaf, twig	CE	Staphylococcus aureus	+	MIC	256	µg/mL	Y	379	antibacterial, anthelmintic					X	X
Embelia schimperi Vatke	Embelia	schimperi Vatke	Primulaceae	Ethiopia	leaf, twig	CE	Staphylococcus aureus (MDR)	+	MIC	256	µg/mL	Y	379	antibacterial, anthelmintic					X	X
Embelia schimperi Vatke	Embelia	schimperi Vatke	Primulaceae	Ethiopia	seed	CE	Staphylococcus aureus	+	MIC	341.33	µg/mL	Y	379	antibacterial, anthelmintic					X	X
Embelia schimperi Vatke	Embelia	schimperi Vatke	Primulaceae	Ethiopia	seed	CE	Staphylococcus aureus (MDR)	+	MIC	341.33	µg/mL	Y	379	antibacterial, anthelmintic					X	X
Ephedra alata subsp. alenda (Stapf) Trab.	Ephedra	alata subsp. alenda (Stapf) Trab.	Ephedraceae	Tunisia	aerial part	CE	Moraxella catarrhalis	-	MIC	230	µg/mL	N	356	NS	X
Ephedra major subsp. procera (C.A.Mey.) Bornm.	Ephedra	major subsp. procera (C.A.Mey.) Bornm.	Ephedraceae	Iran	aerial part	CE	Bacillus cereus	+	MIC	250	µg/mL	N	129	NS	X
Ephedra major subsp. procera (C.A.Mey.) Bornm.	Ephedra	major subsp. procera (C.A.Mey.) Bornm.	Ephedraceae	Iran	aerial part	CE	Enterobacter aerogenes	-	MIC	250	µg/mL	N	129	NS	X
Ephedra major subsp. procera (C.A.Mey.) Bornm.	Ephedra	major subsp. procera (C.A.Mey.) Bornm.	Ephedraceae	Iran	aerial part	CE	Proteus vulgaris	-	MIC	250	µg/mL	N	129	NS	X
Ephedra major subsp. procera (C.A.Mey.) Bornm.	Ephedra	major subsp. procera (C.A.Mey.) Bornm.	Ephedraceae	Iran	aerial part	CE	Pseudomonas aeruginosa	-	MIC	500	µg/mL	N	129	NS	X
Ephedra major subsp. procera (C.A.Mey.) Bornm.	Ephedra	major subsp. procera (C.A.Mey.) Bornm.	Ephedraceae	Iran	aerial part	CE	Staphylococcus aureus	+	MIC	500	µg/mL	N	129	NS	X
Eremophila alternifolia R.Br.	Eremophila	alternifolia R.Br.	Scrophulariaceae	Australia	leaf	CAcet	Staphylococcus aureus	+	MIC	78	µg/mL	N	71	cold, influenza, sore throat, pain, headaches										X			X
Eremophila bignoniiflora (Benth.) F.Muell.	Eremophila	bignoniiflora (Benth.) F.Muell.	Scrophulariaceae	Australia	leaf	CE	Campylobacter jejuni	-	MIC	256	µg/mL	N	243	NS	X
Eremophila caerulea (S.Moore) Diels	Eremophila	caerulea (S.Moore) Diels	Scrophulariaceae	Australia	leaf	CE	Campylobacter jejuni	-	MIC	256	µg/mL	N	243	NS	X
Eremophila fraseri F.Muell.	Eremophila	fraseri F.Muell.	Scrophulariaceae	Australia	leaf	CE	Campylobacter jejuni	-	MIC	256	µg/mL	N	243	NS	X
Eremophila galeata Chinnock	Eremophila	galeata Chinnock	Scrophulariaceae	Australia	leaf	CE	Campylobacter jejuni	-	MIC	256	µg/mL	N	243	NS	X
Eremophila glabra (R.Br.) Ostenf.	Eremophila	glabra (R.Br.) Ostenf.	Scrophulariaceae	Australia	leaf	CE	Campylobacter jejuni	-	MIC	64	µg/mL	N	243	NS	X
Eremophila glabra (R.Br.) Ostenf.	Eremophila	glabra (R.Br.) Ostenf.	Scrophulariaceae	Australia	leaf	CE	Campylobacter coli	-	MIC	256	µg/mL	N	243	NS	X
Eremophila granitica S.Moore	Eremophila	granitica S.Moore	Scrophulariaceae	Australia	leaf	CE	Campylobacter jejuni	-	MIC	256	µg/mL	N	243	NS	X
Eremophila maculata P.J.Müll.	Eremophila	maculata P.J.Müll.	Scrophulariaceae	Australia	leaf	CE	Campylobacter jejuni	-	MIC	128	µg/mL	N	243	NS	X
Eremophila oldfieldii subsp. angustifolia (S.Moore) Chinnock	Eremophila	oldfieldii subsp. angustifolia (S.Moore) Chinnock	Scrophulariaceae	Australia	leaf	CE	Campylobacter jejuni	-	MIC	256	µg/mL	N	243	NS	X
Eruca vesicaria (L.) Cav.	Eruca	vesicaria (L.) Cav.	Brassicaceae	Saudi Arabia	seed	CEtOAc	Bacillus subtilis	+	MIC	400	µg/mL	N	377	diuretic, laxative, aphrodisiac, treats eye infections, stomach and kidney disorders, anti-cancer					X	X	X			X	X
Eruca vesicaria (L.) Cav.	Eruca	vesicaria (L.) Cav.	Brassicaceae	Saudi Arabia	seed	CEtOAc	Escherichia coli	-	MIC	400	µg/mL	N	377	diuretic, laxative, aphrodisiac, treats eye infections, stomach and kidney disorders, anti-cancer					X	X	X			X	X
Eruca vesicaria (L.) Cav.	Eruca	vesicaria (L.) Cav.	Brassicaceae	Saudi Arabia	seed	CEtOAc	Staphylococcus aureus (MSSA)	+	MIC	400	µg/mL	N	377	diuretic, laxative, aphrodisiac, treats eye infections, stomach and kidney disorders, anti-cancer					X	X	X			X	X
Erycibe paniculata Roxb.	Erycibe	paniculata Roxb.	Convolvulaceae	India	leaf	CM	Bacillus cereus	+	MIC	500	µg/mL	N	358	NS	X
Erycibe paniculata Roxb.	Erycibe	paniculata Roxb.	Convolvulaceae	India	leaf	CM	Staphylococcus aureus	+	MIC	500	µg/mL	N	358	NS	X
Eryngium amethystinum L.	Eryngium	amethystinum L.	Apiaceae	Serbia	aerial part	EO	Staphylococcus aureus	+	MIC	2	µg/mL	N	289	diuretic and laxative					X
Eryngium amethystinum L.	Eryngium	amethystinum L.	Apiaceae	Serbia	root	EO	Enterococcus faecalis	+	MIC	7	µg/mL	N	289	diuretic and laxative					X
Eryngium amethystinum L.	Eryngium	amethystinum L.	Apiaceae	Serbia	root	EO	Staphylococcus aureus	+	MIC	7	µg/mL	N	289	diuretic and laxative					X
Eryngium amethystinum L.	Eryngium	amethystinum L.	Apiaceae	Serbia	aerial part	EO	Enterococcus faecalis	+	MIC	150	µg/mL	N	289	diuretic and laxative					X
Eryngium amethystinum L.	Eryngium	amethystinum L.	Apiaceae	Serbia	aerial part	CEtOAc	Klebsiella pneumoniae	-	MIC	310	µg/mL	N	289	diuretic and laxative					X
Eryngium amethystinum L.	Eryngium	amethystinum L.	Apiaceae	Serbia	aerial part	CEtOAc	Staphylococcus epidermidis	+	MIC	310	µg/mL	N	289	diuretic and laxative					X
Eryngium campestre L	Eryngium	campestre L	Apiaceae	Serbia	aerial part	CAcet	Proteus mirabilis	-	MIC	4	µg/mL	N	289	antitussive, diuretic, aperitif, stimulant, aphrodisiac					X		X	X		X			X
Eryngium campestre L	Eryngium	campestre L	Apiaceae	Serbia	aerial part	EO	Staphylococcus aureus	+	MIC	4	µg/mL	N	289	antitussive, diuretic, aperitif, stimulant, aphrodisiac					X		X	X		X			X
Eryngium campestre L	Eryngium	campestre L	Apiaceae	Serbia	aerial part	EO	Enterococcus faecalis	+	MIC	7	µg/mL	N	289	antitussive, diuretic, aperitif, stimulant, aphrodisiac					X		X	X		X			X
Eryngium campestre L	Eryngium	campestre L	Apiaceae	Serbia	aerial part	CEtOAc	Proteus mirabilis	-	MIC	7	µg/mL	N	289	antitussive, diuretic, aperitif, stimulant, aphrodisiac					X		X	X		X			X
Eryngium campestre L	Eryngium	campestre L	Apiaceae	Serbia	root	EO	Staphylococcus aureus	+	MIC	7	µg/mL	N	289	antitussive, diuretic, aperitif, stimulant, aphrodisiac					X		X	X		X			X
Eryngium campestre L	Eryngium	campestre L	Apiaceae	Serbia	aerial part	CEtOAc	Escherichia coli	-	MIC	10	µg/mL	N	289	antitussive, diuretic, aperitif, stimulant, aphrodisiac					X		X	X		X			X
Eryngium campestre L	Eryngium	campestre L	Apiaceae	Serbia	aerial part	CAcet	Escherichia coli	-	MIC	10	µg/mL	N	289	antitussive, diuretic, aperitif, stimulant, aphrodisiac					X		X	X		X			X
Eryngium campestre L	Eryngium	campestre L	Apiaceae	Serbia	aerial part	CAcet	Staphylococcus aureus	+	MIC	10	µg/mL	N	289	antitussive, diuretic, aperitif, stimulant, aphrodisiac					X		X	X		X			X
Eryngium campestre L	Eryngium	campestre L	Apiaceae	Serbia	aerial part, root	EO	Staphylococcus epidermidis	+	MIC	10	µg/mL	N	289	antitussive, diuretic, aperitif, stimulant, aphrodisiac					X		X	X		X			X
Eryngium campestre L	Eryngium	campestre L	Apiaceae	Serbia	aerial part, root	CEtOAc	Staphylococcus aureus	+	MIC	30	µg/mL	N	289	antitussive, diuretic, aperitif, stimulant, aphrodisiac					X		X	X		X			X
Eryngium campestre L	Eryngium	campestre L	Apiaceae	Serbia	aerial part	CA	Escherichia coli	-	MIC	70	µg/mL	N	289	antitussive, diuretic, aperitif, stimulant, aphrodisiac					X		X	X		X			X
Eryngium campestre L	Eryngium	campestre L	Apiaceae	Serbia	aerial part	CM	Escherichia coli	-	MIC	70	µg/mL	N	289	antitussive, diuretic, aperitif, stimulant, aphrodisiac					X		X	X		X			X
Eryngium campestre L	Eryngium	campestre L	Apiaceae	Serbia	aerial part, root	EO	Staphylococcus epidermidis	+	MIC	70	µg/mL	N	289	antitussive, diuretic, aperitif, stimulant, aphrodisiac					X		X	X		X			X
Eryngium campestre L	Eryngium	campestre L	Apiaceae	Serbia	root	EO	Enterococcus faecalis	+	MIC	150	µg/mL	N	289	antitussive, diuretic, aperitif, stimulant, aphrodisiac					X		X	X		X			X
Eryngium campestre L	Eryngium	campestre L	Apiaceae	Serbia	aerial part	EO	Escherichia coli	-	MIC	310	µg/mL	N	289	antitussive, diuretic, aperitif, stimulant, aphrodisiac					X		X	X		X			X
Eryngium campestre L	Eryngium	campestre L	Apiaceae	Serbia	root	EO	Escherichia coli	-	MIC	310	µg/mL	N	289	antitussive, diuretic, aperitif, stimulant, aphrodisiac					X		X	X		X			X
Eryngium glomeratum Lam.	Eryngium	glomeratum Lam.	Apiaceae	Tunisia	aerial part	EO	Pseudomonas aeruginosa	-	MIC	2	µg/mL	N	250	diuretic, appetite stimulant, laxative, antinociceptive or anti‐inflammatory remedies and for the treatment of hypertension, gastrointestinal problems, asthma, burns, fevers, diarrhea, malaria		X	X		X	X	X			X			X
Eryngium glomeratum Lam.	Eryngium	glomeratum Lam.	Apiaceae	Tunisia	aerial part	EO	Stenotrophomonas maltophilia	-	MIC	2	µg/mL	N	250	diuretic, appetite stimulant, laxative, antinociceptive or anti‐inflammatory remedies and for the treatment of hypertension, gastrointestinal problems, asthma, burns, fevers, diarrhea, malaria		X	X		X	X	X			X			X
Eryngium glomeratum Lam.	Eryngium	glomeratum Lam.	Apiaceae	Tunisia	aerial part	EO	Streptococcus agalactiae	+	MIC	2	µg/mL	N	250	diuretic, appetite stimulant, laxative, antinociceptive or anti‐inflammatory remedies and for the treatment of hypertension, gastrointestinal problems, asthma, burns, fevers, diarrhea, malaria		X	X		X	X	X			X			X
Eryngium glomeratum Lam.	Eryngium	glomeratum Lam.	Apiaceae	Tunisia	aerial part	EO	Streptococcus dysgalactiae	+	MIC	39	µg/mL	N	250	diuretic, appetite stimulant, laxative, antinociceptive or anti‐inflammatory remedies and for the treatment of hypertension, gastrointestinal problems, asthma, burns, fevers, diarrhea, malaria		X	X		X	X	X			X			X
Eryngium glomeratum Lam.	Eryngium	glomeratum Lam.	Apiaceae	Tunisia	aerial part	EO	Corynebacterium sp.	+	MIC	78	µg/mL	N	250	diuretic, appetite stimulant, laxative, antinociceptive or anti‐inflammatory remedies and for the treatment of hypertension, gastrointestinal problems, asthma, burns, fevers, diarrhea, malaria		X	X		X	X	X			X			X
Eryngium glomeratum Lam.	Eryngium	glomeratum Lam.	Apiaceae	Tunisia	aerial part	EO	Staphylococcus epidermidis	+	MIC	78	µg/mL	N	250	diuretic, appetite stimulant, laxative, antinociceptive or anti‐inflammatory remedies and for the treatment of hypertension, gastrointestinal problems, asthma, burns, fevers, diarrhea, malaria		X	X		X	X	X			X			X
Eryngium glomeratum Lam.	Eryngium	glomeratum Lam.	Apiaceae	Tunisia	aerial part	EO	Staphylococcus lugdunensis	+	MIC	78	µg/mL	N	250	diuretic, appetite stimulant, laxative, antinociceptive or anti‐inflammatory remedies and for the treatment of hypertension, gastrointestinal problems, asthma, burns, fevers, diarrhea, malaria		X	X		X	X	X			X			X
Eryngium glomeratum Lam.	Eryngium	glomeratum Lam.	Apiaceae	Tunisia	aerial part	EO	Staphylococcus warneri	+	MIC	156	µg/mL	N	250	diuretic, appetite stimulant, laxative, antinociceptive or anti‐inflammatory remedies and for the treatment of hypertension, gastrointestinal problems, asthma, burns, fevers, diarrhea, malaria		X	X		X	X	X			X			X
Eryngium glomeratum Lam.	Eryngium	glomeratum Lam.	Apiaceae	Tunisia	aerial part	EO	Enterococcus faecalis	+	MIC	312	µg/mL	N	250	diuretic, appetite stimulant, laxative, antinociceptive or anti‐inflammatory remedies and for the treatment of hypertension, gastrointestinal problems, asthma, burns, fevers, diarrhea, malaria		X	X		X	X	X			X			X
Eryngium glomeratum Lam.	Eryngium	glomeratum Lam.	Apiaceae	Tunisia	aerial part	EO	Mycobacterium smegmatis	+	MIC	312	µg/mL	N	250	diuretic, appetite stimulant, laxative, antinociceptive or anti‐inflammatory remedies and for the treatment of hypertension, gastrointestinal problems, asthma, burns, fevers, diarrhea, malaria		X	X		X	X	X			X			X
Eryngium glomeratum Lam.	Eryngium	glomeratum Lam.	Apiaceae	Tunisia	aerial part	EO	Staphylococcus aureus	+	MIC	312	µg/mL	N	250	diuretic, appetite stimulant, laxative, antinociceptive or anti‐inflammatory remedies and for the treatment of hypertension, gastrointestinal problems, asthma, burns, fevers, diarrhea, malaria		X	X		X	X	X			X			X
Eryngium palmatum Pančić & Vis.	Eryngium	palmatum Pančić & Vis.	Apiaceae	Serbia	aerial part	CEtOAc	Proteus mirabilis	-	MIC	4	µg/mL	N	289	NS	X
Eryngium palmatum Pančić & Vis.	Eryngium	palmatum Pančić & Vis.	Apiaceae	Serbia	aerial part	EO	Enterococcus faecalis	+	MIC	7	µg/mL	N	289	NS	X
Eryngium palmatum Pančić & Vis.	Eryngium	palmatum Pančić & Vis.	Apiaceae	Serbia	root	EO	Staphylococcus aureus	+	MIC	7	µg/mL	N	289	NS	X
Eryngium palmatum Pančić & Vis.	Eryngium	palmatum Pančić & Vis.	Apiaceae	Serbia	aerial part	CEtOAc	Enterococcus faecalis	+	MIC	10	µg/mL	N	289	NS	X
Eryngium palmatum Pančić & Vis.	Eryngium	palmatum Pančić & Vis.	Apiaceae	Serbia	aerial part	CEtOAc	Escherichia coli	-	MIC	10	µg/mL	N	289	NS	X
Eryngium palmatum Pančić & Vis.	Eryngium	palmatum Pančić & Vis.	Apiaceae	Serbia	aerial part	EO	Escherichia coli	-	MIC	10	µg/mL	N	289	NS	X
Eryngium palmatum Pančić & Vis.	Eryngium	palmatum Pančić & Vis.	Apiaceae	Serbia	aerial part	CAcet	Proteus mirabilis	-	MIC	10	µg/mL	N	289	NS	X
Eryngium palmatum Pančić & Vis.	Eryngium	palmatum Pančić & Vis.	Apiaceae	Serbia	aerial part	EO	Staphylococcus aureus	+	MIC	10	µg/mL	N	289	NS	X
Eryngium palmatum Pančić & Vis.	Eryngium	palmatum Pančić & Vis.	Apiaceae	Serbia	aerial part	CEtOAc	Staphylococcus aureus	+	MIC	20	µg/mL	N	289	NS	X
Eryngium palmatum Pančić & Vis.	Eryngium	palmatum Pančić & Vis.	Apiaceae	Serbia	aerial part	CAcet	Enterococcus faecalis	+	MIC	30	µg/mL	N	289	NS	X
Eryngium palmatum Pančić & Vis.	Eryngium	palmatum Pančić & Vis.	Apiaceae	Serbia	aerial part	CAcet	Staphylococcus aureus	+	MIC	30	µg/mL	N	289	NS	X
Eryngium palmatum Pančić & Vis.	Eryngium	palmatum Pančić & Vis.	Apiaceae	Serbia	aerial part	CA	Escherichia coli	-	MIC	70	µg/mL	N	289	NS	X
Eryngium palmatum Pančić & Vis.	Eryngium	palmatum Pančić & Vis.	Apiaceae	Serbia	aerial part	CM	Escherichia coli	-	MIC	70	µg/mL	N	289	NS	X
Eryngium palmatum Pančić & Vis.	Eryngium	palmatum Pančić & Vis.	Apiaceae	Serbia	aerial part	CAcet	Escherichia coli	-	MIC	70	µg/mL	N	289	NS	X
Eryngium palmatum Pančić & Vis.	Eryngium	palmatum Pančić & Vis.	Apiaceae	Serbia	aerial part	CM	Proteus mirabilis	-	MIC	70	µg/mL	N	289	NS	X
Eryngium palmatum Pančić & Vis.	Eryngium	palmatum Pančić & Vis.	Apiaceae	Serbia	root	EO	Enterococcus faecalis	+	MIC	150	µg/mL	N	289	NS	X
Eryngium palmatum Pančić & Vis.	Eryngium	palmatum Pančić & Vis.	Apiaceae	Serbia	aerial part	CAcet	Klebsiella pneumoniae	-	MIC	310	µg/mL	N	289	NS	X
Eryngium palmatum Pančić & Vis.	Eryngium	palmatum Pančić & Vis.	Apiaceae	Serbia	aerial part	CEtOAc	Pseudomonas aeruginosa	-	MIC	310	µg/mL	N	289	NS	X
Eryngium palmatum Pančić & Vis.	Eryngium	palmatum Pančić & Vis.	Apiaceae	Serbia	aerial part	EO	Staphylococcus epidermidis	+	MIC	310	µg/mL	N	289	NS	X
Eryngium pusillum L.	Eryngium	pusillum L.	Apiaceae	Tunisia	aerial part	EO	Stenotrophomonas maltophilia	-	MIC	150	µg/mL	N	250	diuretic, appetite stimulant, laxative, antinociceptive or anti‐inflammatory remedies and for the treatment of hypertension, gastrointestinal problems, asthma, burns, fevers, diarrhea, malaria		X	X		X	X	X			X			X
Eryngium pusillum L.	Eryngium	pusillum L.	Apiaceae	Tunisia	aerial part	EO	Pseudomonas aeruginosa	-	MIC	310	µg/mL	N	250	diuretic, appetite stimulant, laxative, antinociceptive or anti‐inflammatory remedies and for the treatment of hypertension, gastrointestinal problems, asthma, burns, fevers, diarrhea, malaria		X	X		X	X	X			X			X
Eryngium pusillum L.	Eryngium	pusillum L.	Apiaceae	Tunisia	aerial part	EO	Staphylococcus epidermidis	+	MIC	310	µg/mL	N	250	diuretic, appetite stimulant, laxative, antinociceptive or anti‐inflammatory remedies and for the treatment of hypertension, gastrointestinal problems, asthma, burns, fevers, diarrhea, malaria		X	X		X	X	X			X			X
Eryngium pusillum L.	Eryngium	pusillum L.	Apiaceae	Tunisia	aerial part	EO	Staphylococcus lugdunensis	+	MIC	500	µg/mL	N	250	diuretic, appetite stimulant, laxative, antinociceptive or anti‐inflammatory remedies and for the treatment of hypertension, gastrointestinal problems, asthma, burns, fevers, diarrhea, malaria		X	X		X	X	X			X			X
Eryngium pusillum L.	Eryngium	pusillum L.	Apiaceae	Tunisia	aerial part	EO	Streptococcus agalactiae	+	MIC	500	µg/mL	N	250	diuretic, appetite stimulant, laxative, antinociceptive or anti‐inflammatory remedies and for the treatment of hypertension, gastrointestinal problems, asthma, burns, fevers, diarrhea, malaria		X	X		X	X	X			X			X
Erythrina caffra Thunb.	Erythrina	caffra Thunb.	Fabaceae	South Africa	root	CM/Chl (1:1)	Moraxella catarrhalis	-	MIC	100	µg/mL	N	470	respiratory infections													X
Erythrina caffra Thunb.	Erythrina	caffra Thunb.	Fabaceae	South Africa	root	CM/Chl (1:1)	Staphylococcus aureus	+	MIC	150	µg/mL	N	470	respiratory infections													X
Erythrina lysistemon Hutch.	Erythrina	lysistemon Hutch.	Fabaceae	South Africa	leaf	CDichl	Pseudomonas aeruginosa	-	MIC	200	µg/mL	N	273	sores, abcesses, and open wounds			X
Erythrina lysistemon Hutch.	Erythrina	lysistemon Hutch.	Fabaceae	South Africa	leaf	CDichl	Staphylococcus aureus	+	MIC	200	µg/mL	N	273	sores, abcesses, and open wounds			X
Erythrina lysistemon Hutch.	Erythrina	lysistemon Hutch.	Fabaceae	South Africa	leaf	CDichl	Staphylococcus aureus (GMRSA)	+	MIC	200	µg/mL	N	273	sores, abcesses, and open wounds			X
Erythrina lysistemon Hutch.	Erythrina	lysistemon Hutch.	Fabaceae	South Africa	leaf	CDichl	Staphylococcus aureus (MRSA)	+	MIC	200	µg/mL	N	273	sores, abcesses, and open wounds			X
Erythrina lysistemon Hutch.	Erythrina	lysistemon Hutch.	Fabaceae	South Africa	leaf	CDichl	Staphylococcus epidermidis	+	MIC	200	µg/mL	N	273	sores, abcesses, and open wounds			X
Erythrina signmoidea Hua	Erythrina	signmoidea Hua	Fabaceae	Cameroon	bark	CM	Enterobacter aerogenes	-	MIC	16	µg/mL	N	138	antidote for stings and bites, diuretic, febrifuge, treat arthritis, rheumatism, pulmonary troubles, stomach troubles, infectious and kidney diseases			X		X	X	X		X
Erythrina signmoidea Hua	Erythrina	signmoidea Hua	Fabaceae	Cameroon	bark	CM	Escherichia coli	-	MIC	16	µg/mL	N	138	antidote for stings and bites, diuretic, febrifuge, treat arthritis, rheumatism, pulmonary troubles, stomach troubles, infectious and kidney diseases			X		X	X	X		X
Erythrina signmoidea Hua	Erythrina	signmoidea Hua	Fabaceae	Cameroon	bark	CM	Klebsiella pneumoniae	-	MIC	16	µg/mL	N	138	antidote for stings and bites, diuretic, febrifuge, treat arthritis, rheumatism, pulmonary troubles, stomach troubles, infectious and kidney diseases			X		X	X	X		X
Erythrina signmoidea Hua	Erythrina	signmoidea Hua	Fabaceae	Cameroon	leaf	CM	Escherichia coli	-	MIC	32	µg/mL	N	138	antidote for stings and bites, diuretic, febrifuge, treat arthritis, rheumatism, pulmonary troubles, stomach troubles, infectious and kidney diseases			X		X	X	X		X
Erythrina signmoidea Hua	Erythrina	signmoidea Hua	Fabaceae	Cameroon	bark	CM	Providencia stuartii	-	MIC	32	µg/mL	N	138	antidote for stings and bites, diuretic, febrifuge, treat arthritis, rheumatism, pulmonary troubles, stomach troubles, infectious and kidney diseases			X		X	X	X		X
Erythrina signmoidea Hua	Erythrina	signmoidea Hua	Fabaceae	Cameroon	leaf	CM	Klebsiella pneumoniae	-	MIC	128	µg/mL	N	138	antidote for stings and bites, diuretic, febrifuge, treat arthritis, rheumatism, pulmonary troubles, stomach troubles, infectious and kidney diseases			X		X	X	X		X
Erythrina signmoidea Hua	Erythrina	signmoidea Hua	Fabaceae	Cameroon	leaf	CM	Providencia stuartii	-	MIC	128	µg/mL	N	138	antidote for stings and bites, diuretic, febrifuge, treat arthritis, rheumatism, pulmonary troubles, stomach troubles, infectious and kidney diseases			X		X	X	X		X
Erythrina signmoidea Hua	Erythrina	signmoidea Hua	Fabaceae	Cameroon	bark	CM	Pseudomonas aeruginosa	-	MIC	256	µg/mL	N	138	antidote for stings and bites, diuretic, febrifuge, treat arthritis, rheumatism, pulmonary troubles, stomach troubles, infectious and kidney diseases			X		X	X	X		X
Erythrophleum lasianthum Corbishley	Erythrophleum	lasianthum Corbishley	Fabaceae	South Africa	stem	CM	Staphylococcus aureus (MRSA)	+	MIC	39.06	µg/mL	N	333	Fever, dermatitis, wounds, rheumatism, syphilis, gonorrhea, leprosy, tuberculosis, bronchitis, angina		X	X			X		X	X
Erythrophleum lasianthum Corbishley	Erythrophleum	lasianthum Corbishley	Fabaceae	South Africa	stem	CM	Escherichia coli (Beta-lactamase +)	-	MIC	156.25	µg/mL	N	333	Fever, dermatitis, wounds, rheumatism, syphilis, gonorrhea, leprosy, tuberculosis, bronchitis, angina		X	X			X		X	X
Erythrophleum lasianthum Corbishley	Erythrophleum	lasianthum Corbishley	Fabaceae	South Africa	leaf	CM	Klebsiella pneumoniae (Ampicillin-R)	-	MIC	156.25	µg/mL	N	333	Fever, dermatitis, wounds, rheumatism, syphilis, gonorrhea, leprosy, tuberculosis, bronchitis, angina		X	X			X		X	X
Erythrophleum lasianthum Corbishley	Erythrophleum	lasianthum Corbishley	Fabaceae	South Africa	stem	CM	Pseudomonas aeruginosa	-	MIC	156.25	µg/mL	N	333	Fever, dermatitis, wounds, rheumatism, syphilis, gonorrhea, leprosy, tuberculosis, bronchitis, angina		X	X			X		X	X				X
Erythrophleum lasianthum Corbishley	Erythrophleum	lasianthum Corbishley	Fabaceae	South Africa	leaf	CM	Citrobacter freundii (chloramphenicol-R)	-	MIC	312.5	µg/mL	N	333	Fever, dermatitis, wounds, rheumatism, syphilis, gonorrhea, leprosy, tuberculosis, bronchitis, angina		X	X			X		X	X				X
Erythrophleum lasianthum Corbishley	Erythrophleum	lasianthum Corbishley	Fabaceae	South Africa	stem	CM	Citrobacter freundii (chloramphenicol-R)	-	MIC	312.5	µg/mL	N	333	Fever, dermatitis, wounds, rheumatism, syphilis, gonorrhea, leprosy, tuberculosis, bronchitis, angina		X	X			X		X	X				X
Erythrophleum lasianthum Corbishley	Erythrophleum	lasianthum Corbishley	Fabaceae	South Africa	stem	CM	Klebsiella pneumoniae (Ampicillin-R)	-	MIC	312.5	µg/mL	N	333	Fever, dermatitis, wounds, rheumatism, syphilis, gonorrhea, leprosy, tuberculosis, bronchitis, angina		X	X			X		X	X				X
Erythrophleum lasianthum Corbishley	Erythrophleum	lasianthum Corbishley	Fabaceae	South Africa	leaf	CM	Staphylococcus aureus (MRSA)	+	MIC	312.5	µg/mL	N	333	Fever, dermatitis, wounds, rheumatism, syphilis, gonorrhea, leprosy, tuberculosis, bronchitis, angina		X	X			X		X	X				X
Etlingera coccinea (Blume) S.Sakai & Nagam.	Etlingera	coccinea (Blume) S.Sakai & Nagam.	Zingiberaceae	Malaysia	leaf	CHex	Bacillus cereus	+	MIC	16	µg/mL	N	114	wounds, stomach aches, food poisoning, urine cleanser			X		X		X
Etlingera coccinea (Blume) S.Sakai & Nagam.	Etlingera	coccinea (Blume) S.Sakai & Nagam.	Zingiberaceae	Malaysia	leaf	CHex	Bacillus subtilis	+	MIC	16	µg/mL	N	114	wounds, stomach aches, food poisoning, urine cleanser			X		X		X
Etlingera coccinea (Blume) S.Sakai & Nagam.	Etlingera	coccinea (Blume) S.Sakai & Nagam.	Zingiberaceae	Malaysia	leaf	CHex	Staphylococcus epidermidis	+	MIC	16	µg/mL	N	114	wounds, stomach aches, food poisoning, urine cleanser			X		X		X
Etlingera coccinea (Blume) S.Sakai & Nagam.	Etlingera	coccinea (Blume) S.Sakai & Nagam.	Zingiberaceae	Malaysia	leaf	CHex	Streptococcus pneumoniae	+	MIC	16	µg/mL	N	114	wounds, stomach aches, food poisoning, urine cleanser			X		X		X
Etlingera coccinea (Blume) S.Sakai & Nagam.	Etlingera	coccinea (Blume) S.Sakai & Nagam.	Zingiberaceae	Malaysia	leaf	CDichl	Bacillus cereus	+	MIC	31	µg/mL	N	114	wounds, stomach aches, food poisoning, urine cleanser			X		X		X
Etlingera coccinea (Blume) S.Sakai & Nagam.	Etlingera	coccinea (Blume) S.Sakai & Nagam.	Zingiberaceae	Malaysia	leaf	CEtOAc	Bacillus cereus	+	MIC	31	µg/mL	N	114	wounds, stomach aches, food poisoning, urine cleanser			X		X		X
Etlingera coccinea (Blume) S.Sakai & Nagam.	Etlingera	coccinea (Blume) S.Sakai & Nagam.	Zingiberaceae	Malaysia	leaf	CDichl	Bacillus subtilis	+	MIC	31	µg/mL	N	114	wounds, stomach aches, food poisoning, urine cleanser			X		X		X
Etlingera coccinea (Blume) S.Sakai & Nagam.	Etlingera	coccinea (Blume) S.Sakai & Nagam.	Zingiberaceae	Malaysia	leaf	CEtOAc	Bacillus subtilis	+	MIC	31	µg/mL	N	114	wounds, stomach aches, food poisoning, urine cleanser			X		X		X
Etlingera coccinea (Blume) S.Sakai & Nagam.	Etlingera	coccinea (Blume) S.Sakai & Nagam.	Zingiberaceae	Malaysia	leaf	CDichl	Enterococcus faecalis	+	MIC	31	µg/mL	N	114	wounds, stomach aches, food poisoning, urine cleanser			X		X		X
Etlingera coccinea (Blume) S.Sakai & Nagam.	Etlingera	coccinea (Blume) S.Sakai & Nagam.	Zingiberaceae	Malaysia	leaf	CHex	Staphylococcus aureus	+	MIC	31	µg/mL	N	114	wounds, stomach aches, food poisoning, urine cleanser			X		X		X
Etlingera coccinea (Blume) S.Sakai & Nagam.	Etlingera	coccinea (Blume) S.Sakai & Nagam.	Zingiberaceae	Malaysia	leaf	CDichl	Staphylococcus epidermidis	+	MIC	31	µg/mL	N	114	wounds, stomach aches, food poisoning, urine cleanser			X		X		X
Etlingera coccinea (Blume) S.Sakai & Nagam.	Etlingera	coccinea (Blume) S.Sakai & Nagam.	Zingiberaceae	Malaysia	leaf	CEtOAc	Staphylococcus epidermidis	+	MIC	31	µg/mL	N	114	wounds, stomach aches, food poisoning, urine cleanser			X		X		X
Etlingera coccinea (Blume) S.Sakai & Nagam.	Etlingera	coccinea (Blume) S.Sakai & Nagam.	Zingiberaceae	Malaysia	leaf	CDichl	Streptococcus pneumoniae	+	MIC	31	µg/mL	N	114	wounds, stomach aches, food poisoning, urine cleanser			X		X		X
Etlingera coccinea (Blume) S.Sakai & Nagam.	Etlingera	coccinea (Blume) S.Sakai & Nagam.	Zingiberaceae	Malaysia	leaf	CEtOAc	Streptococcus pneumoniae	+	MIC	31	µg/mL	N	114	wounds, stomach aches, food poisoning, urine cleanser			X		X		X
Etlingera coccinea (Blume) S.Sakai & Nagam.	Etlingera	coccinea (Blume) S.Sakai & Nagam.	Zingiberaceae	Malaysia	stem	CHex	Bacillus cereus	+	MIC	63	µg/mL	N	114	wounds, stomach aches, food poisoning, urine cleanser			X		X		X
Etlingera coccinea (Blume) S.Sakai & Nagam.	Etlingera	coccinea (Blume) S.Sakai & Nagam.	Zingiberaceae	Malaysia	stem	CDichl	Bacillus cereus	+	MIC	63	µg/mL	N	114	wounds, stomach aches, food poisoning, urine cleanser			X		X		X
Etlingera coccinea (Blume) S.Sakai & Nagam.	Etlingera	coccinea (Blume) S.Sakai & Nagam.	Zingiberaceae	Malaysia	stem	CHex	Bacillus subtilis	+	MIC	63	µg/mL	N	114	wounds, stomach aches, food poisoning, urine cleanser			X		X		X
Etlingera coccinea (Blume) S.Sakai & Nagam.	Etlingera	coccinea (Blume) S.Sakai & Nagam.	Zingiberaceae	Malaysia	stem	CDichl	Bacillus subtilis	+	MIC	63	µg/mL	N	114	wounds, stomach aches, food poisoning, urine cleanser			X		X		X
Etlingera coccinea (Blume) S.Sakai & Nagam.	Etlingera	coccinea (Blume) S.Sakai & Nagam.	Zingiberaceae	Malaysia	leaf	CHex	Enterococcus faecalis	+	MIC	63	µg/mL	N	114	wounds, stomach aches, food poisoning, urine cleanser			X		X		X
Etlingera coccinea (Blume) S.Sakai & Nagam.	Etlingera	coccinea (Blume) S.Sakai & Nagam.	Zingiberaceae	Malaysia	leaf	CDichl	Staphylococcus aureus	+	MIC	63	µg/mL	N	114	wounds, stomach aches, food poisoning, urine cleanser			X		X		X
Etlingera coccinea (Blume) S.Sakai & Nagam.	Etlingera	coccinea (Blume) S.Sakai & Nagam.	Zingiberaceae	Malaysia	leaf	CEtOAc	Staphylococcus aureus	+	MIC	63	µg/mL	N	114	wounds, stomach aches, food poisoning, urine cleanser			X		X		X
Etlingera coccinea (Blume) S.Sakai & Nagam.	Etlingera	coccinea (Blume) S.Sakai & Nagam.	Zingiberaceae	Malaysia	stem	CHex	Staphylococcus epidermidis	+	MIC	63	µg/mL	N	114	wounds, stomach aches, food poisoning, urine cleanser			X		X		X
Etlingera coccinea (Blume) S.Sakai & Nagam.	Etlingera	coccinea (Blume) S.Sakai & Nagam.	Zingiberaceae	Malaysia	stem	CDichl	Staphylococcus epidermidis	+	MIC	63	µg/mL	N	114	wounds, stomach aches, food poisoning, urine cleanser			X		X		X
Etlingera coccinea (Blume) S.Sakai & Nagam.	Etlingera	coccinea (Blume) S.Sakai & Nagam.	Zingiberaceae	Malaysia	stem	CHex	Streptococcus pneumoniae	+	MIC	63	µg/mL	N	114	wounds, stomach aches, food poisoning, urine cleanser			X		X		X
Etlingera coccinea (Blume) S.Sakai & Nagam.	Etlingera	coccinea (Blume) S.Sakai & Nagam.	Zingiberaceae	Malaysia	stem	CDichl	Streptococcus pneumoniae	+	MIC	63	µg/mL	N	114	wounds, stomach aches, food poisoning, urine cleanser			X		X		X
Etlingera coccinea (Blume) S.Sakai & Nagam.	Etlingera	coccinea (Blume) S.Sakai & Nagam.	Zingiberaceae	Malaysia	leaf	CEtOAc	Enterococcus faecalis	+	MIC	125	µg/mL	N	114	wounds, stomach aches, food poisoning, urine cleanser			X		X		X
Etlingera coccinea (Blume) S.Sakai & Nagam.	Etlingera	coccinea (Blume) S.Sakai & Nagam.	Zingiberaceae	Malaysia	stem	CHex	Enterococcus faecalis	+	MIC	125	µg/mL	N	114	wounds, stomach aches, food poisoning, urine cleanser			X		X		X
Etlingera coccinea (Blume) S.Sakai & Nagam.	Etlingera	coccinea (Blume) S.Sakai & Nagam.	Zingiberaceae	Malaysia	stem	CDichl	Enterococcus faecalis	+	MIC	125	µg/mL	N	114	wounds, stomach aches, food poisoning, urine cleanser			X		X		X
Etlingera coccinea (Blume) S.Sakai & Nagam.	Etlingera	coccinea (Blume) S.Sakai & Nagam.	Zingiberaceae	Malaysia	stem	CHex	Staphylococcus aureus	+	MIC	125	µg/mL	N	114	wounds, stomach aches, food poisoning, urine cleanser			X		X		X
Etlingera coccinea (Blume) S.Sakai & Nagam.	Etlingera	coccinea (Blume) S.Sakai & Nagam.	Zingiberaceae	Malaysia	stem	CDichl	Staphylococcus aureus	+	MIC	125	µg/mL	N	114	wounds, stomach aches, food poisoning, urine cleanser			X		X		X
Etlingera coccinea (Blume) S.Sakai & Nagam.	Etlingera	coccinea (Blume) S.Sakai & Nagam.	Zingiberaceae	Malaysia	rhizome	CHex	Staphylococcus aureus	+	MIC	500	µg/mL	N	114	wounds, stomach aches, food poisoning, urine cleanser			X		X		X
Etlingera elatior (Jack) R.M. Sm.	Etlingera	elatior (Jack) R.M. Sm.	Zingiberaceae	Brazil	root	EO	Fusobacterium nucleatum	-	MIC	125	µg/mL	N	66	antimicrobial activity against oral biofilms												X
Etlingera elatior (Jack) R.M. Sm.	Etlingera	elatior (Jack) R.M. Sm.	Zingiberaceae	Brazil	root	EO	Porphyromonas gingivalis	-	MIC	125	µg/mL	N	66	antimicrobial activity against oral biofilms												X
Etlingera pubescens (B.L.Burtt & R.M.Sm.) R.M.Sm.	Etlingera	pubescens (B.L.Burtt & R.M.Sm.) R.M.Sm.	Zingiberaceae	Malaysia	leaf	CM	Bacillus cereus	+	MIC	125	µg/mL	N	115	antihyperuricemic, antioxidant, chemotherapeutic, headaches						X			X	X
Etlingera pubescens (B.L.Burtt & R.M.Sm.) R.M.Sm.	Etlingera	pubescens (B.L.Burtt & R.M.Sm.) R.M.Sm.	Zingiberaceae	Malaysia	leaf	CM	Bacillus subtilis	+	MIC	125	µg/mL	N	115	antihyperuricemic, antioxidant, chemotherapeutic, headaches						X			X	X
Etlingera pubescens (B.L.Burtt & R.M.Sm.) R.M.Sm.	Etlingera	pubescens (B.L.Burtt & R.M.Sm.) R.M.Sm.	Zingiberaceae	Malaysia	stem	CM	Enterococcus faecalis	+	MIC	125	µg/mL	N	115	antihyperuricemic, antioxidant, chemotherapeutic, headaches						X			X	X
Etlingera pubescens (B.L.Burtt & R.M.Sm.) R.M.Sm.	Etlingera	pubescens (B.L.Burtt & R.M.Sm.) R.M.Sm.	Zingiberaceae	Malaysia	leaf	CM	Staphylococcus aureus	+	MIC	125	µg/mL	N	115	antihyperuricemic, antioxidant, chemotherapeutic, headaches						X			X	X
Etlingera pubescens (B.L.Burtt & R.M.Sm.) R.M.Sm.	Etlingera	pubescens (B.L.Burtt & R.M.Sm.) R.M.Sm.	Zingiberaceae	Malaysia	stem	CM	Bacillus cereus	+	MIC	250	µg/mL	N	115	antihyperuricemic, antioxidant, chemotherapeutic, headaches						X			X	X
Etlingera pubescens (B.L.Burtt & R.M.Sm.) R.M.Sm.	Etlingera	pubescens (B.L.Burtt & R.M.Sm.) R.M.Sm.	Zingiberaceae	Malaysia	stem	CM	Bacillus subtilis	+	MIC	250	µg/mL	N	115	antihyperuricemic, antioxidant, chemotherapeutic, headaches						X			X	X
Etlingera pubescens (B.L.Burtt & R.M.Sm.) R.M.Sm.	Etlingera	pubescens (B.L.Burtt & R.M.Sm.) R.M.Sm.	Zingiberaceae	Malaysia	stem	CM	Staphylococcus aureus	+	MIC	250	µg/mL	N	115	antihyperuricemic, antioxidant, chemotherapeutic, headaches						X			X	X
Etlingera pubescens (B.L.Burtt & R.M.Sm.) R.M.Sm.	Etlingera	pubescens (B.L.Burtt & R.M.Sm.) R.M.Sm.	Zingiberaceae	Malaysia	leaf	CM	Staphylococcus epidermidis	+	MIC	250	µg/mL	N	115	antihyperuricemic, antioxidant, chemotherapeutic, headaches						X			X	X
Etlingera pubescens (B.L.Burtt & R.M.Sm.) R.M.Sm.	Etlingera	pubescens (B.L.Burtt & R.M.Sm.) R.M.Sm.	Zingiberaceae	Malaysia	leaf	CM	Streptococcus pneumoniae	+	MIC	250	µg/mL	N	115	antihyperuricemic, antioxidant, chemotherapeutic, headaches						X			X	X
Etlingera pubescens (B.L.Burtt & R.M.Sm.) R.M.Sm.	Etlingera	pubescens (B.L.Burtt & R.M.Sm.) R.M.Sm.	Zingiberaceae	Malaysia	leaf	CM	Enterococcus faecalis	+	MIC	500	µg/mL	N	115	antihyperuricemic, antioxidant, chemotherapeutic, headaches						X			X	X
Etlingera sessilanthera R.M.Sm.	Etlingera	sessilanthera R.M.Sm.	Zingiberaceae	Malaysia	rhizome	CHex	Bacillus cereus	+	MIC	125	µg/mL	N	114	antimicrobial						X
Etlingera sessilanthera R.M.Sm.	Etlingera	sessilanthera R.M.Sm.	Zingiberaceae	Malaysia	rhizome	CHex	Bacillus subtilis	+	MIC	500	µg/mL	N	114	antimicrobial						X
Eucalyptus camaldulensis Dehnh.	Eucalyptus	camaldulensis Dehnh.	Myrtaceae	Ethiopia	leaf	CM	Mycobacterium tuberculosis	+	MIC	6.25	µg/mL	N	175	Cough and tuberculosis treatment						X							X
Eucalyptus camaldulensis Dehnh.	Eucalyptus	camaldulensis Dehnh.	Myrtaceae	Ethiopia	leaf	CM	Mycobacterium bovis	+	MIC	52.2	µg/mL	N	175	Cough and tuberculosis treatment						X							X
Eucalyptus camaldulensis Dehnh.	Eucalyptus	camaldulensis Dehnh.	Myrtaceae	Nigeria	stem bark	CHex	Mycobacterium tuberculosis	+	MIC	4	µg/mL	N	254	cold, cough, influenza, toothache, fever, sore throat, infections						X						X	X
Eucalyptus camaldulensis Dehnh.	Eucalyptus	camaldulensis Dehnh.	Myrtaceae	Nigeria	leaf	CHex	Mycobacterium tuberculosis	+	MIC	24.2	µg/mL	N	254	cold, cough, influenza, toothache, fever, sore throat, infections						X						X	X
Eucalyptus camaldulensis Dehnh.	Eucalyptus	camaldulensis Dehnh.	Myrtaceae	Nigeria	leaf	CChl	Mycobacterium tuberculosis	+	MIC	26.8	µg/mL	N	254	cold, cough, influenza, toothache, fever, sore throat, infections						X						X	X
Eucalyptus camaldulensis Dehnh.	Eucalyptus	camaldulensis Dehnh.	Myrtaceae	Nigeria	stem bark	CChl	Mycobacterium tuberculosis	+	MIC	40.8	µg/mL	N	254	cold, cough, influenza, toothache, fever, sore throat, infections						X						X	X
Eucalyptus camaldulensis Dehnh.	Eucalyptus	camaldulensis Dehnh.	Myrtaceae	Nigeria	leaf	CM	Mycobacterium tuberculosis	+	MIC	52.2	µg/mL	N	254	cold, cough, influenza, toothache, fever, sore throat, infections						X						X	X
Eucalyptus camaldulensis Dehnh.	Eucalyptus	camaldulensis Dehnh.	Myrtaceae	South Africa	bark	CDichl	Cutibacterium acnes	+	MIC	100	µg/mL	N	273	acne			X
Eucalyptus camaldulensis Dehnh.	Eucalyptus	camaldulensis Dehnh.	Myrtaceae	South Africa	bark	CA	Bacillus megaterium	+	MIC	200	µg/mL	N	273	acne			X
Eucalyptus camaldulensis Dehnh.	Eucalyptus	camaldulensis Dehnh.	Myrtaceae	South Africa	bark	CDichl	Bacillus megaterium	+	MIC	250	µg/mL	N	273	acne			X
Eucalyptus camaldulensis Dehnh.	Eucalyptus	camaldulensis Dehnh.	Myrtaceae	South Africa	bark	CDichl	Staphylococcus aureus (GMRSA)	+	MIC	250	µg/mL	N	273	acne			X
Eucalyptus camaldulensis Dehnh.	Eucalyptus	camaldulensis Dehnh.	Myrtaceae	South Africa	bark	CDichl	Staphylococcus aureus	+	MIC	500	µg/mL	N	273	acne			X
Eucalyptus camaldulensis Dehnh.	Eucalyptus	camaldulensis Dehnh.	Myrtaceae	South Africa	bark	CDichl	Staphylococcus aureus (MRSA)	+	MIC	500	µg/mL	N	273	acne			X
Eucalyptus camaldulensis Dehnh.	Eucalyptus	camaldulensis Dehnh.	Myrtaceae	South Africa	bark	CDichl	Staphylococcus epidermidis	+	MIC	500	µg/mL	N	273	acne			X
Eucalyptus camaldulensis Dehnh.	Eucalyptus	camaldulensis Dehnh.	Myrtaceae	Ethiopia	leaf	EO	Bacillus spp.	+	MIC	5	μL/mL	N	325	NS	X
Eucalyptus camaldulensis Dehnh.	Eucalyptus	camaldulensis Dehnh.	Myrtaceae	Ethiopia	leaf	EO	Escherichia coli	-	MIC	5	μL/mL	N	325	NS	X
Eucalyptus camaldulensis Dehnh.	Eucalyptus	camaldulensis Dehnh.	Myrtaceae	Ethiopia	leaf	EO	Shigella spp.	-	MIC	5	μL/mL	N	325	NS	X
Eucalyptus camaldulensis Dehnh.	Eucalyptus	camaldulensis Dehnh.	Myrtaceae	Egypt	leaf	EO	Bacillus subtilis	+	MIC	250	µg/mL	N	388	NS	X
Eucalyptus camaldulensis Dehnh.	Eucalyptus	camaldulensis Dehnh.	Myrtaceae	Egypt	leaf	EO	Pseudomonas aeruginosa	-	MIC	500	µg/mL	N	388	NS	X
[truncated: 2,944 more rows]

## Sheet: References
Reference Number*	Reference
*These reference numbers do not correspond to reference numbers in other supplemental data or the text of the manuscript.
1	Abbaszadegan, A.; Ghahramani, Y.; Gholami, A.; Kazemi, A.; Ghasemi, Y.; Ghareghan, R.; Ghareghan, M.; Iraji, A., Antimicrobial and Cytotoxic Activity of Cuminum cyminum as an Intracanal Medicament Compared to Chlorhexidine Gel. Iran. Endod. J. 2016, 11 (1), 44-50.
2	Abdolrahimzadeh, H.; Bolandparvaz, S.; Abbasi, H. R.; Dehghankhalili, M.; Paydar, S.; Dehghanian, A.; Hafez Ghoran, S.; Asadollahi, M.; Zare, M., Antimicrobial Survey of Local Herbal Drugs against Acinetobacter baumannii Isolated from Patients Admitted to a Level-I Trauma Center. Bull. Emerg. Trauma 2018, 6 (4), 355-362.
3	Abdulah, R.; Milanda, T.; Sugijanto, M.; Barliana, M. I.; Diantini, A.; Supratman, U.; Subarnas, A., Antibacterial Properties of Selected Plants Consumed by Primates against Escherichia coli and Bacillus subtilis. Southeast Asian J. Trop. Med. Public Health 2017, 48 (1), 109-16.
4	Abedini, A.; Roumy, V.; Mahieux, S.; Gohari, A.; Farimani, M. M.; Riviere, C.; Samaillie, J.; Sahpaz, S.; Bailleul, F.; Neut, C.; Hennebelle, T., Antimicrobial Activity of Selected Iranian Medicinal Plants against a Broad Spectrum of Pathogenic and Drug-Multiresistant Microorganisms. Lett. Appl. Microbiol. 2014, 59 (4), 412-421.
5	Abiodun, O. O.; Sood, S.; Osiyemi, O. A.; Agnihotri, V. K.; Gulati, A.; Ajaiyeoba, E. O.; Singh, B., In Vitro Antimicrobial Activity of Crude Ethanol Extracts and Fractions of Terminalia catappa and Vitex doniana. Afr. J. Med. Med. Sci. 2015, 44 (1), 21-6.
6	Abolfazl, M.; Hadi, A.; Frhad, M.; Hossein, N., In Vitro Antibacterial Activity and Phytochemical Analysis of Some Medicinal Plants. J. Med. Plants Res. 2014, 8 (3), 186-194, 8.
7	Acimovic, M. G.; Pavlovic, S. D.; Varga, A. O.; Filipovic, V. M.; Cvetkovic, M. T.; Stankovic, J. M.; Cabarkapa, I. S., Chemical Composition and Antibacterial Activity of Angelica archangelica Root Essential Oil. Nat. Prod. Commun. 2017, 12 (2), 205-206.
8	Afrin, S.; Pervin, R.; Sabrin, F.; Sohrab, M. H.; Rony, S. R.; Islam, M. E.; Islam, K. D.; Billah, M. M., Assessment of Antioxidant, Antibacterial, and Preliminary Cytotoxic Activity of Chloroform and Methanol Extracts of Caesalpinia crista L. Leaf. Bangladesh J. Bot. 2016, 45 (5), 1061-1068.
9	Aghraz, A.; Benameur, Q.; Gervasi, T.; Ait Dra, L.; Ben-Mahdi, M. H.; Larhsini, M.; Markouk, M.; Cicero, N., Antibacterial Activity of Cladanthus arabicus and Bubonium imbricatum Essential Oils Alone and in Combination with Conventional Antibiotics Against Enterobacteriaceae Isolates. Lett. Appl. Microbiol. 2018, 67 (2), 175-182.
10	Ahmed, S.; Liu, H.; Ahmad, A.; Akram, W.; Abdelrahman, E. K. N.; Ran, F.; Ou, W.; Dong, S.; Cai, Q.; Zhang, Q.; Li, X.; Hu, S.; Hu, X., Characterization of Anti-bacterial Compounds from the Seed Coat of Chinese Windmill Palm Tree (Trachycarpus fortunei). Front. Microbiol. 2017, 8, 1894.
11	Aires, A.; Dias, C.; Carvalho, R.; Saavedra, M. J., Analysis of Glycosylated Flavonoids Extracted from Sweet-Cherry Stems, as Antibacterial Agents against Pathogenic Escherichia coli Isolate. Acta Biochim. Pol. 2017, 64 (2), 265-271.
12	Aissani, N.; Coroneo, V.; Fattouch, S.; Caboni, P., Inhibitory Effect of Carob (Ceratonia siliqua) Leaves Methanolic Extract on Listeria monocytogenes. J. Agric. Food Chem. 2012, 60 (40), 9954-8.
13	Akarca, G., Composition and Antibacterial Effect on Food Borne Pathogens of Hibiscus surrattensis L. Calyces Essential Oil. Ind. Crops Prod. 2019, 137, 285-289.
14	Akinpelu, D. A.; Alayande, K. A.; Aiyegoro, O. A.; Okoh, A. I.; Akinpelu, O. F., Probable Mechanisms of Biocidal Action of Cocos nucifera Husk Extract and Fractions on Bacteria Isolates. BMC Complement. Altern. Med. 2015, 15, 116.
15	Akter, K.; Barnes, E. C.; Brophy, J. J.; Harrington, D.; Community Elders, Y.; Vemulpad, S. R.; Jamie, J. F., Phytochemical Profile and Antibacterial and Antioxidant Activities of Medicinal Plants Used by Aboriginal People of New South Wales, Australia. J. Evidence-Based Complementary Altern. Med. 2016, 2016, 4683059.
16	Al Ghasham, A.; Al Muzaini, M.; Qureshi, K. A.; Elhassan, G. O.; Khan, R. A.; Farhana, S. A.; Hashmi, S.; El-Agamy, E.; Abdallah, W. E., Phytochemical Screening, Antioxidant and Antimicrobial Activities of Methanolic Extract of Ziziphus mauritiana Lam. Leaves Collected from Unaizah, Saudi Arabia. Int. J. Pharm. Res. Allied Sci. 2017, 6 (3), 33-46.
17	Al-Azzawi, A.; Alguboori, A.; Hachim, M. Y.; Najat, M.; Al, S. A.; Sad, M., Preliminary Phytochemical and Antibacterial Screening of Sesuvium portulacastrum in the United Arab Emirates. Pharmacogn. Res. 2012, 4 (4), 219-24.
18	Al-sieni, A. I. I., The Antibacterial Activity of Traditionally Used Salvadora persica L. (miswak) and Commiphora gileadensis (palsam) in Saudi Arabia. Afr. J. Tradit., Complementary Altern. Med. 2014, 11 (1), 23-7.
19	Albadawi, D. A.; Mothana, R. A.; Khaled, J. M.; Ashour, A. E.; Kumar, A.; Ahmad, S. F.; Al-Said, M. S.; Al-Rehaily, A. J.; Almusayeib, N. M., Antimicrobial, Anticancer, and Antioxidant Compounds from Premna resinosa growing in Saudi Arabia. Pharm. Biol. 2017, 55 (1), 1759-1766.
20	Aldulaimi, O., Screening of Fruits of Seven Plants Indicated for Medicinal Use in Iraq. Pharmacogn. Mag. 2017, 13 (Suppl 2), S189-s195.
21	Aleixo, A. A.; Camargos, V. N.; dos Santos Pereira Andrade, A. C.; Herrera, K. M. S.; Maciel de Azambuja Ribeiro, R. I.; dos Santos, K. M.; Teixeira de Magalhaes, J.; Magalhaes, J. C.; dos Santos Lima, L. A. R.; Ferreira, J. M. S., Antibacterial and Cytotoxic Antibacterial Potential of Ethanol Extract and Fractions from Aristolochia galeata Mart. ex Zucc. J. Med. Plants Res. 2014, 8 (7), 326-330,…
22	Alharbi, N. S.; Khaled, J. M.; Alzaharni, K. E.; Mothana, R. A.; Alsaid, M. S.; Alhoshan, M.; Dass, L. A.; Kadaikunnan, S.; Alobaidi, A. S., Effects of Piper cubeba L. Essential Oil on Methicillin-Resistant Staphylococcus aureus: an AFM and TEM Study. J. Mol. Recognit. 2017, 30 (1).
23	Ali, M. Y.; Rahman, M. M.; Rahman, A.; Basaglia, M.; Sultana, T.; Casella, S., Isolation of Bacillus spp. from Soil and an Evaluation of Their Sensitivity Towards Different Extracts and Essential Oils of Cumin (Cuminum cyminum L.). J. Agric. Sci. Technol. (Tehran, Islamic Repub. Iran) 2014, 16 (3), 623-633.
24	Ali, N. A. A.; Wursterb, M.; Denkert, A.; Arnold, N.; Fadail, I.; Al-Didamony, G.; Lindequist, U.; Wessjohann, L.; Setzer, W. N., Chemical Composition, Antimicrobial, Antioxidant and Cytotoxic Activity of Essential Oils of Plectranthus cylindraceus and Meriandra benghalensis from Yemen. Nat. Prod. Commun. 2012, 7 (8), 1099-102
25	Aliahmadi, A.; Sonboli, A.; Mirzajani, F.; Ghassempour, A., Bioassay Guided Fractionation of an Anti-Methicillin-Resistant Staphylococcus aureus Flavonoid From Bromus inermis Leyss Inflorescences. Jundishapur J. Microbiol. 2014, 7 (12), e12739.
26	Aliakbarlu, J.; Sadaghiani, S. K.; Mohammadi, S., Comparative Evaluation of Antioxidant and Anti Food-borne Bacterial Activities of Essential Oils from Some Spices Commonly Consumed in Iran. Food Sci. Biotechnol. 2013, 22 (6), 1487-1493.
27	Almalki, M. A., In-Vitro Antibacterial, Antifungal, Antibiofilm, and Antioxidant Potentials of Isopimpinellin Recovered from Citrullus colocynthis. Int. J. Pharm. Pharm. Sci. 2016, 8 (4), 117-122.
28	Amabye, T. G., Evaluation of Physiochemical, Phytochemical, Antioxidant and Antimicrobial Screening Parameters of Amaranthus spinosus leaves. Nat. Prod. Chem. Res. 2016, 4 (1), 1000199/1-1000199/5.
29	Ameya, G.; Gure, A.; Dessalegn, E., Antimicrobial Activity of Echinops kebericho against Human Pathogenic Bacteria and Fungi. Afr. J. Tradit., Complementary Altern. Med. 2016, 13 (6), 199-203.
30	Aminnezhad, S.; Kermanshahi, R. K.; Ranjbar, R., Effect of Althaea officinalis Extract on Growth and Biofilm Formation in Pseudomonas aeruginosa. J. Pure Appl. Microbiol. 2016, 10 (3), 1857-1863.
31	Amoo, S. O.; Aremu, A. O.; Moyo, M.; Van Staden, J., Assessment of Long-Term Storage on Antimicrobial and Cyclooxygenase-Inhibitory Properties of South African Medicinal Plants. Phytother. Res. 2013, 27 (7), 1029-1035.
32	Amoo, S. O.; Van Staden, J., Pharmacological Properties and In Vitro Shoot Production of Barleria argillicola - A Critically Endangered South African Species. S. Afr. J. Bot. 2013, 85, 87-93.
33	Anlas, C.; Bakirel, T.; Ustun-Alkan, F.; Celik, B.; Baran, M. Y.; Ustuner, O.; Kuruuzum-Uz, A., In Vitro Evaluation of the Therapeutic Potential of Anatolian Kermes Oak (Quercus coccifera L.) as an Alternative Wound Healing Agent. Ind. Crops Prod. 2019, 137, 24-32.
34	Araujo, R. C.; Neves, F. A.; Formagio, A. S.; Kassuya, C. A.; Stefanello, M. E.; Souza, V. V.; Pavan, F. R.; Croda, J., Evaluation of the Anti-Mycobacterium tuberculosis Activity and In Vivo Acute Toxicity of Annona sylvatic. BMC Complement. Altern. Med, 2014, 14, 209.
35	Araujo, F. M.; Dantas, M. C. S. M.; e. Silva, L. S.; Aona, L. Y. S.; Tavares, I. F.; de Souza-Neta, L. C., Antibacterial Activity and Chemical Composition of the Essential Oil of Croton heliotropiifolius Kunth from Amargosa, Bahia, Brazil. Ind. Crops Prod. 2017, 105, 203-206.
36	Aro, A. O.; Dzoyem, J. P.; Hlokwe, T. M.; Madoroba, E.; Eloff, J. N.; McGaw, L. J., Some South African Rubiaceae Tree Leaf Extracts Have Antimycobacterial Activity Against Pathogenic and Non-pathogenic Mycobacterium Species. Phytother. Res. 2015, 29 (7), 1004-10.
37	Aro, A. O.; Dzoyem, J. P.; Eloff, J. N.; McGaw, L. J., Extracts of Six Rubiaceae Species Combined with Rifampicin Have Good In Vitro Synergistic Antimycobacterial Activity and Good Anti-Inflammatory and Antioxidant Activities. BMC Complement. Altern. Med. 2016, 16 (1), 385.
38	Aro, A. O.; Dzoyem, J. P.; Awouafack, M. D.; Selepe, M. A.; Eloff, J. N.; McGaw, L. J., Fractions and Isolated Compounds from Oxyanthus speciosus subsp. stenocarpus (Rubiaceae) Have Promising Antimycobacterial and Intracellular Activity. BMC Complement. Altern. Med. 2019, 19 (1), 108.
39	Arshad, M. S.; Hussain, I.; Mahmood, M. S.; Khan, M. N., Evaluation of Antimicrobial Potential of Acacia nilotica (Kikar) against Oral Pathogens Associated with Caries and Periodontitis. Pak. J. Agric. Sci. 2017, 54 (2), 423-430.
40	Ashafa, A. O. T., Medicinal Potential of Morella serata (Lam.) Killick (Myricaceae) Root Extracts: Biological and Pharmacological Activities. BMC Complement. Altern. Med. 2013, 13, 163
41	Ashmawy, N. A.; Salem, M. Z. M.; El-Hefny, M.; Abd, E.-K. M. S. M.; El-Shanhorey, N. A.; Mohamed, A. A.; Salem, A. Z. M., Antibacterial Activity of the Bioactive Compounds Identified in Three Woody Plants Against Some Pathogenic Bacteria. Microb. Pathog. 2018, 121, 331-340.
42	Ashraf, S.; Anjum, A. A.; Ahmad, A.; Firyal, S.; Sana, S.; Latif, A. A., In Vitro Activity of Nigella sativa Against Antibiotic Resistant Salmonella enterica. Environ. Toxicol. Pharmacol. 2018, 58, 54-58.
43	Askun, T.; Tekwu, E. M.; Satil, F.; Modanlioglu, S.; Aydeniz, H., Preliminary Antimycobacterial Study on Selected Turkish plants (Lamiaceae) against Mycobacterium tuberculosis and Search for Some Phenolic Constituents. BMC Complement. Altern. Med. 2013, 13, 365.
44	Asres, K.; Tadesse, S.; Mazumder, A.; Bucar, F., Essential Oil of Plectranthus cylindraceus Hochst. ex. Benth from Ethiopia: Chemical Composition and Antimicrobial Activity. J. Essent. Oil-Bear. Plants 2013, 16 (2), 136-143.
45	Awah, N. S.; Agu, K. C.; Iikedinma, J. C.; Uzoechi, A. N.; Eneite, H. C.; Victor-Aduloju, A. T.; Umeoduagu, N. D.; Onwuatuegwu, J. T. C.; Ilikannu, S. O., Antibacterial Activities of the Aqueous and Ethanolic Extracts of the Male and Female Carica papaya Leaves on Some Pathogenic Bacteria. Bioeng. Biosci. 2017, 5 (2), 25-29.
46	Azevedo, M. M. B.; Chaves, F. C. M.; Almeida, C. A.; Bizzo, H. R.; Duarte, R. S.; Campos-Takaki, G. M.; Alviano, C. S.; Alviano, D. S., Antioxidant and Antimicrobial Activities of 7-Hydroxy-calamenene-rich Essential Oils from Croton cajucara Benth. Molecules 2013, 18 (1), 1128-37.
47	Baananou, S.; Bouftira, I.; Mahmoud, A.; Boukef, K.; Marongiu, B.; Boughattas, N. A., Antiulcerogenic and Antibacterial Activities of Apium graveolens Essential Oil and Axtract. Nat. Prod. Res. 2013, 27 (12), 1075-83.
48	Babahmad, R. A.; Aghraz, A.; Boutafda, A.; Papazoglou, E. G.; Tarantilis, P. A.; Kanakis, C.; Hafidi, M.; Ouhdouch, Y.; Outzourhit, A.; Ouhammou, A., Chemical Composition of Essential Oil of Jatropha curcas L. Leaves and its Antioxidant and Antimicrobial Activities. Ind. Crops Prod. 2018, 121, 405-410.
49	Bai, S.; Bharti, P.; Seasotiya, L.; Malik, A.; Dalal, S., In Vitro Screening and Evaluation of Some Indian Medicinal Plants for their Potential to Inhibit Jack Bean and Bacterial Ureases Causing Urinary Infections. Pharm. Biol. 2015, 53 (3), 326-33.
50	Bajpai, V. K.; Sharma, A.; Baek, K. H., Antibacterial Mechanism of Action of Taxus cuspidata Stem Essential Oil Against Selected Foodborne Pathogens. J. Food Saf. 2013, 33 (3), 348-359.
51	Balasubramanian, K.; Shanmugam, R., Phytochemical Analysis and Pathogenic Inhibition Activity of Pedalium murex (L.) Against Rrinary Tract Infection Bacteria. Int. J. Curr. Res. 2016, 8 (9), 38546-38551.
52	Banfi, S.; Caruso, E.; Orlandi, T.; Barbieri, P.; Cavallari, S.; Vigano, P.; Clerici, P.; Chiodaroli, L., Antibacterial Activity of Leaf Extracts from Combretum micranthum and Guiera senegalensis (Combretaceae). Res. J. Microbiol. 2014, 9 (2), 66-81, 16.
53	Barbosa, L. N.; Probst, I. S.; Murbach Teles Andrade, B. F.; Bergamo Alves, F. C.; Albano, M.; Mores Rall, V. L.; Junior, A. F., Essential Oils from Herbs Against Foodborne Pathogens in Chicken Sausage. J. Oleo. Sci. 2015, 64 (1), 117-24.
54	Barboza, T. J. d. S.; Albarello, N.; Ferreira, A. F.; Ignacio, A. C. d. P. R., Antimicrobial Activity of Anonna mucosa (Jacq.) Grown In Vivo and Obtained by In Vitro Culture. Braz. J. Microbiol. 2015, 46 (3), 785-9.
55	Bardaji, D. K.; da Silva, J. J.; Bianchi, T. C.; de Souza Eugenio, D.; de Oliveira, P. F.; Leandro, L. F.; Rogez, H. L.; Venezianni, R. C.; Ambrosio, S. R.; Tavares, D. C.; Bastos, J. K.; Martins, C. H., Copaifera reticulata Oleoresin: Chemical Characterization and Antibacterial Properties Against Oral Pathogens. Anaerobe 2016, 40, 18-27.
56	Bardaji, D. K. R.; Reis, E. B.; Lucarini, R.; Martins, C. H. G.; Medeiros, T. C. T.; Crotti, A. E. M., Antibacterial Activity of Commercially Available Plant-Derived Essential Oils Against Oral Pathogenic Bacteria. Nat. Prod. Res. 2016, 30 (10), 1178-81.
57	Bardaweel, S. K.; Tawaha, K. A.; Hudaib, M. M., Antioxidant, Antimicrobial and Antiproliferative Activities of Anthemis palestina Essential Oil. BMC Complement. Altern. Med. 2014, 14, 297.
58	Basri, D. F.; Tan, L. S.; Shafiei, Z.; Zin, N. M., In Vitro Antibacterial Activity of Galls of Quercus infectoria Olivier Against Oral Pathogens. Inventi Impact: Ethnopharmacol. 2012, (1), 26-31.
59	Becerril, R.; Nerin, C.; Gomez-Lus, R., Evaluation of Bacterial Resistance to Essential Oils and Antibiotics after Exposure to Oregano and Cinnamon Essential Oils. Foodborne Pathog. Dis. 2012, 9 (8), 699-705.
60	Bejaoui, A.; Chaabane, H.; Jemli, M.; Boulila, A.; Boussaid, M., Essential Oil Composition and Antibacterial Activity of Origanum vulgare subsp. glandulosum Desf. at Different Phenological Stages. J. Med. Food 2013, 16 (12), 1115-20.
61	Bejaoui, A.; Ben Salem, I.; Rokbeni, N.; M'Rabet, Y.; Boussaid, M.; Boulila, A., Bioactive Compounds from Hypericum humifusum and Hypericum perfoliatum: Inhibition Potential of Polyphenols with Acetylcholinesterase and Key Enzymes Linked to Type-2 Diabetes. Pharm. Biol. 2017, 55 (1), 906-911.
62	Ben Othman, M.; Bel Hadj Salah-Fatnassi, K.; Ncibi, S.; Elaissi, A.; Zourgui, L., Antimicrobial Activity of Essential Oil and Aqueous and Ethanol Extracts of Teucrium polium L. subsp. gabesianum (L.H.) from Tunisia. Physiol. Mol. Biol. Plants 2017, 23 (3), 723-729.
63	Benevides Bahiense, J.; Marques, F. M.; Figueira, M. M.; Vargas, T. S.; Kondratyuk, T. P.; Endringer, D. C.; Scherer, R.; Fronza, M., Potential Anti-Inflammatory, Antioxidant and Antimicrobial Activities of Sambucus australis. Pharm. Biol. 2017, 55 (1), 991-997.
64	Bensouici, C.; Kabouche, A.; Karioti, A.; Ozturk, M.; Duru, M. E.; Bilia, A. R.; Kabouche, Z., Compounds from Sedum caeruleum with Antioxidant, Anticholinesterase, and Antibacterial Activities. Pharm. Biol. 2016, 54 (1), 174-9.
65	Bernuci, K. Z.; Iwanaga, C. C.; Fernandez-Andrade, C. M.; Lorenzetti, F. B.; Torres-Santos, E. C.; Faioes, V. D.; Goncalves, J. E.; do Amaral, W.; Deschamps, C.; Scodro, R. B.; Cardoso, R. F.; Baldin, V. P.; Cortez, D. A., Evaluation of Chemical Composition and Antileishmanial and Antituberculosis Activities of Essential Oils of Piper Species. Molecules 2016, 21 (12).
66	Bersan, S. M. F.; Galvao, L. C. C.; Goes, V. F. F.; Sartoratto, A.; Figueira, G. M.; Rehder, V. L. G.; Alencar, S. M.; Duarte, R. M. T.; Rosalen, P. P.; Duarte, M. C. T., Action of Essential Oils from Brazilian Native and Exotic Medicinal Species on Oral Biofilms. BMC Complement. Altern. Med. 2014, 14, 451/1-451/21.
67	Besbes Hlila, M.; Mosbah, H.; Majouli, K.; Ben Nejma, A.; Ben Jannet, H.; Mastouri, M.; Aouni, M.; Selmi, B., Antimicrobial Activity of Scabiosa arenaria Forssk. Extracts and Pure Compounds Using Bioguided Fractionation. Chem. Biodivers. 2016, 13 (10), 1262-1272.
68	Bhatnagar, M.; Avasthi, A. S.; Singh, S.; Ghosal, S., Evaluation of Anti-Leishmanial and Antibacterial Activity of Waldheimia tomentosa (Asteraceae), and Chemical Profiling of the Most Bioactive Fraction. Trop. J. Pharm. Res. 2017, 16 (9), 2169-2178.
69	Bigos, M.; Wasiela, M.; Kalemba, D.; Sienkiewicz, M., Antimicrobial Activity of Geranium Oil Against Clinical Strains of Staphylococcus aureus. Molecules 2012, 17 (9), 10276-91.
70	Bisi-Johnson, M. A.; Obi, C. L.; Samuel, B. B.; Eloff, J. N.; Okoh, A. I., Antibacterial Activity of Crude Extracts of Some South African Medicinal Plants Against Multidrug Resistant Etiological Agents of Diarrhea. BMC Complement. Altern. Med. 2017, 17, 321/1-321/9.
71	Biva, I. J.; Griesser, H. J.; Ndi, C. P.; Semple, S. J., Antibacterial Constituents of Eremophila alternifolia: An Australian Aboriginal Traditional Medicinal Plant. J. Ethnopharmacol. 2016, 182, 1-9.
72	Bogavac, M.; Karaman, M.; Janjusevic, L.; Sudji, J.; Radovanovic, B.; Novakovic, Z.; Simeunovic, J.; Bozin, B., Alternative Treatment of Vaginal Infections - In Vitro Antimicrobial and Toxic Effects of Coriandrum sativum L. and Thymus vulgaris L. Essential Oils. J. Appl. Microbiol. 2015, 119 (3), 697-710.
73	Bouattour, E.; Fakhfakh, J.; Damak, M.; Mezghani, J. R.; Frikha, D. D.; Jabou, K., Hexane Extract of Echinops spinosissimus Turra subsp. spinosus from Tunisia: A Potential Source of Acetylated Sterols - Investigation of its Biological Activities. Chem. Biodivers. 2016, 13 (12), 1674-1684.
74	Boudjema, K.; Bouanane, A.; Gamgani, S.; Djeziri, M.; Abou Mustapha, M.; Fazouane, F., Phytochemical Profile and Antimicrobial Properties of Volatile Compounds of Satureja calamintha (L) Scheel from Northern Algeria. Trop. J. Pharm. Res. 2018, 17 (5), 857-864.
75	Boulaaba, M.; Snoussi, M.; Saada, M.; Mkadmini, K.; Smaoui, A.; Abdelly, C.; Ksouri, R., Antimicrobial Activities and Phytochemical Analysis of Tamarix gallica Extracts. Ind. Crops Prod. 2015, 76, 1114-1122.
76	Boulekbache-Makhlouf, L.; Slimani, S.; Madani, K., Total Phenolic Content, Antioxidant and Antibacterial Activities of Fruits of Eucalyptus globulus Cultivated in Algeria. Ind. Crops Prod. 2013, 41, 85-89.
77	Bouyahya, A.; Et-Touys, A.; Bakri, Y.; Talbaui, A.; Fellah, H.; Abrini, J.; Dakka, N., Chemical Composition of Mentha pulegium and Rosmarinus officinalis Essential Oils and Their Antileishmanial, Antibacterial and Antioxidant Activities. Microb. Pathog. 2017, 111, 41-49.
78	Braga Ribeiro, A. M.; Sousa, J. N.; Costa, L. M.; Oliveira, F. A. A.; Dos Santos, R. C.; Silva Nunes, A. S.; da Silva, W. O.; Marques Cordeiro, P. J.; de Sousa Lima Neto, J.; de Siqueira-Junior, J. P.; Kaatz, G. W.; Barreto, H. M.; de Oliveira, A. P., Antimicrobial Activity of Phyllanthus amarus Schumach. & Thonn and Inhibition of the NorA Efflux Pump of Staphylococcus aureus by Phyllanthin. Micr…
79	Brusotti, G.; Cesari, I.; Gilardoni, G.; Tosi, S.; Grisoli, P.; Picco, A. M.; Caccialanza, G., Chemical Composition and Antimicrobial Activity of Phyllanthus muellerianus (Kuntze) Excel Essential Oil. J. Ethnopharmacol. 2012, 142 (3), 657-62.
80	Buldain, D.; Buchamer, A. V.; Marchetti, M. L.; Aliverti, F.; Bandoni, A.; Mestorino, N., Combination of Cloxacillin and Essential Oil of Melaleuca armillaris as an Alternative Against Staphylococcus aureus. Front. Vet. Sci. 2018, 5, 177.
81	Burman, S.; Bhattacharya, K.; Mukherjee, D.; Chandra, G., Antibacterial Efficacy of Leaf Extracts of Combretum album Pers. Against Some Pathogenic Bacteria. BMC Complement. Altern. Med. 2018, 18 (1), 213.
82	Buru, A. S.; Pichika, M. R.; Neela, V.; Mohandas, K., In Vitro Antibacterial Effects of Cinnamomum extracts on Common Bacteria Found in Wound Infections with Emphasis on Methicillin-Resistant Staphylococcus aureus. J. Ethnopharmacol. 2014, 153 (3), 587-95.
83	Caetano da Silva, S. D.; Mendes de Souza, M. G.; Oliveira Cardoso, M. J.; da Silva Moraes, T.; Ambrosio, S. R.; Sola Veneziani, R. C.; Martins, C. H. G., Antibacterial Activity of Pinus elliottii Against Anaerobic Bacteria Present in Primary Endodontic Infections. Anaerobe 2014, 30, 146-152.
84	Campana, R.; Casettari, L.; Fagioli, L.; Cespi, M.; Bonacucina, G.; Baffone, W., Activity of Essential Oil-Based Microemulsions Against Staphylococcus aureus Biofilms Developed on Stainless Steel Surface in Different Culture media and Growth Conditions. Int. J. Food Microbiol. 2017, 241, 132-140.
85	Carneiro, N. S.; Alves, C. C. F.; Alves, J. M.; Egea, M. B.; Martins, C. H. G.; Silva, T. S.; Bretanha, L. C.; Balleste, M. P.; Micke, G. A.; Silveira, E. V.; Miranda, M. L. D., Chemical Composition, Antioxidant and Antibacterial Activities of Essential Oils from Leaves and Flowers of Eugenia klotzschiana Berg (Myrtaceae). An. Acad. Bras. Cienc. 2017, 89 (3), 1907-1915.
86	Carvalho, L. V.; Cordeiro, M. F.; TU, E. L.; Sampaio, M. C.; de Mello, G. S.; da Costa, V. C.; Marques, L. L.; Klein, T.; de Mello, J. C.; Cavalcanti, I. M.; Pitta, I. D.; Galdino da Rocha Pitta, M.; Rego, M. J., Evaluation of Antibacterial, Antineoplastic, and Immunomodulatory Activity of Paullinia cupana Seeds Crude Extract and Ethyl-Acetate Fraction. Evid. Based Complement. Alternat. Med. 2016…
87	Cazella, L. N.; Glamoclija, J.; Sokovic, M.; Goncalves, J. E.; Linde, G. A.; Colauto, N. B.; Gazim, Z. C., Antimicrobial Activity of Essential Oil of Baccharis dracunculifolia DC (Asteraceae) Aerial Parts at Flowering Period. Front. Plant. Sci. 2019, 10, 27.
88	Celaya, L.; Viturro, C.; Silva, L. R., Acantholippia salsoloides: Phytochemical Composition and Biological Potential of a Thujonic Population. Nat. Prod. Commun. 2019, 14 (6).
89	Cesari, I.; Hoerle, M.; Simoes-Pires, C.; Grisoli, P.; Queiroz, E. F.; Dacarro, C.; Marcourt, L.; Moundipa, P. F.; Carrupt, P. A.; Cuendet, M.; Caccialanza, G.; Wolfender, J. L.; Brusotti, G., Anti-Inflammatory, Antimicrobial and Antioxidant Activities of Diospyros bipindensis (Gurke) Extracts and its Main Constituents. J. Ethnopharmacol. 2013, 146 (1), 264-70.
90	Cetojevic-Simin, D. D.; Velicanski, A. S.; Cvetkovic, D. D.; Markov, S. L.; Cetkovic, G. S.; Tumbas Saponjac, V. T.; Vulic, J. J.; Canadanovic-Brunet, J. M.; Djilas, S. M., Bioactivity of Meeker and Willamette raspberry (Rubus idaeus L.) Pomace Extracts. Food Chem. 2015, 166, 407-13.
91	Chaban, M. F.; Karagianni, C.; Joray, M. B.; Toumpa, D.; Sola, C.; Crespo, M. I.; Palacios, S. M.; Athanassopoulos, C. M.; Carpinella, M. C., Antibacterial Effects of Extracts Obtained from Plants of Argentina: Bioguided Isolation of Compounds from the Anti-Infectious Medicinal Plant Lepechinia meyenii. J. Ethnopharmacol. 2019, 239, 111930.
92	Chaftar, N.; Girardot, M.; Frere, J.; Imbert, C.; Ghrairi, T.; Hani, K.; Quellard, N.; Labanowski, J., Activity of Six Essential Oils Extracted from Tunisian Plants Against Legionella pneumophila. Chem. Biodivers. 2015, 12 (10), 1565-74.
93	das Chagas Almeida, A.; Azevedo Rodrigues, L.; Dos Santos Paulino, G.; Pereira Aguilar, A.; Andrade Almeida, A.; Olavo Ferreira, S.; Brandao, G. C.; Viana Leite, J. P.; de Oliveira Barros Ribon, A., Prenylated Flavonoid-Enriched Fraction from Maclura tinctoria Shows Biological Activity Against Staphylococcus aureus and Protects Galleria mellonella Larvae from Bacterial Infection. BMC Complement. …
94	Chaib, F.; Allali, H.; Bennaceur, M.; Flamini, G., Chemical Composition and Antimicrobial Activity of Essential Oils from the Aerial Parts of Asteriscus graveolens (Forssk.) Less. and Pulicaria incisa (Lam.) DC.: Two Asteraceae Herbs Growing Wild in the Hoggar. Chem. Biodivers. 2017, 14 (8).
95	Chakotiya, A. S.; Chawla, R.; Thakur, P.; Tanwar, A.; Goel, R.; Narula, A.; Grover, S. S.; Arora, R.; Sharma, R. K., In Vitro Bactericidal Activity of Promising Nutraceuticals for Targeting Multidrug Resistant Pseudomonas aeruginosa. Nutrition 2016, 32 (7-8), 890-7.
96	Chakraborty, B.; Nath, A.; Saikia, H.; Sengupta, M., Bactericidal Activity of Selected Medicinal Plants Against Multidrug Resistant Bacterial Strains from Clinical Isolates. Asian Pac. J. Trop. Med. 2014, 7s1, S435-41.
97	Chan, C.-L.; Gan, R.-Y.; Shah, N. P.; Corke, H., Polyphenols from Selected Dietary Spices and Medicinal Herbs Differentially Affect Common Food-Borne Pathogenic Bacteria and Lactic Acid Bacteria. Food Control 2018, 92, 437-443.
98	Chattopadhyay, D.; Ojha, D.; Mukherjee, H.; Bag, P.; Vaidya, S. P.; Dutta, S., Validation of a Traditional Preparation Against Multi-Drug Resistant Salmonella typhi and its Protective Efficacy in S. typhimurium Infected Mice. Biomed. Pharmacother. 2018, 99, 286-289.
99	Chemsa, A. E.; Erol, E.; Ozturk, M.; Zellagui, A.; Ozgur, C.; Gherraf, N.; Duru, M. E., Chemical Constituents of Essential Oil of Endemic Rhanterium suaveolens Desf. Growing in Algerian Sahara with Antibiofilm, Antioxidant and Anticholinesterase Activities. Nat. Prod. Res. 2016, 30 (18), 2120-4.
100	Chen, X.; Wang, C.; Chen, J.; Onivogui, G.; Song, Y., Antibacterial Activity of Lotus Leaves (Nelumbo nucifera) Against Food-Borne Pathogens. Am. J. Biochem. Biotechnol. 2015, 11 (1), 11-16.
101	Chew, Y. L.; Mahadi, A. M.; Wong, K. M.; Goh, J. K., Anti-Methicillin-Resistance Staphylococcus aureus (MRSA) Compounds from Bauhinia kockiana Korth. and Their Mechanism of Antibacterial Activity. BMC Complement. Altern. Med. 2018, 18 (1), 70.
102	Chukwujekwu, J. C.; Amoo, S. O.; Van, S. J., Antimicrobial, Antioxidant, Mutagenic and Antimutagenic Activities of Distephanus angulifolius and Ormocarpum trichocarpum. J. Ethnopharmacol. 2013, 148 (3), 975-9.
103	Chukwujekwu, J. C.; van Staden, J., In Vitro Antibacterial Activity of Combretum edwardsii, Combretum krausii, and Maytenus nemorosa and Their Synergistic Effects in Combination with Antibiotics. Front. Pharmacol. 2016, 7, 208.
104	Chung, P. Y.; Chung, L. Y.; Navaratnam, P., Potential Targets by Pentacyclic Triterpenoids from Callicarpa farinosa Against Methicillin-Resistant and Sensitive Staphylococcus aureus. Fitoterapia 2014, 94, 48-54.
105	Costa, G. M.; Endo, E. H.; Cortez, D. A.; Nakamura, T. U.; Nakamura, C. V.; Dias Filho, B. P., Antimicrobial Effects of Piper hispidum Extract, Fractions and Chalcones Against Candida albicans and Staphylococcus aureus. J. Mycol. Med. 2016, 26 (3), 217-26.
106	Coulibaly, K.; Zirihi, G. N.; Guessennd-Kouadio, N.; Oussou, K. R.; Dosso, M., Antibacterial Properties Studies of Trunk Barks of Terminalia ivorensis, a Commercial and Medicinal Species on Some Methicillin-Resistant Staphylococci species Strains. Afr. Health Sci. 2014, 14 (3), 753-6.
107	Curcic, M. G.; Stankovic, M. S.; Radojevic, I. D.; Stefanovic, O. D.; Comic, L. R.; Topuzovic, M. D.; Djacic, D. S.; Markovic, S. D., Biological Effects, Total Phenolic Content and Flavonoid Concentrations of Fragrant Yellow Onion (Allium flavum L.). Med. Chem. 2012, 8 (1), 46-51.
108	Cvetanovic, A.; Zekovic, Z.; Zengin, G.; Maskovic, P.; Petronijevic, M.; Radojkovic, M., Multidirectional Approaches on Autofermented Chamomile Ligulate Flowers: Antioxidant, Antimicrobial, Cytotoxic and Enzyme Inhibitory Effects. S. Afr. J. Bot. 2019, 120, 112-118.
109	da Cruz, R. C.; Denardi, L. B.; Mossmann, N. J.; Piana, M.; Alves, S. H.; de Campos, M. M., Antimicrobial Activity and Chromatographic Analysis of Extracts from Tropaeolum pentaphyllum Lam. Tubers. Molecules 2016, 21 (5).
110	da, S. M. T.; Leandro, L. F.; de, O. S. L.; Santiago, M. B.; Souza, A. B.; Furtado, R. A.; Tavares, D. C.; Veneziani, R. C. S.; Ambrosio, S. R.; Bastos, J. K.; Martins, C. H. G., In Vitro Evaluation of Copaifera oblongifolia Oleoresin Against Bacteria Causing Oral Infections and Assessment of Its Cytotoxic Potential. Curr. Pharm. Biotechnol. 2016, 17 (10), 894-904.
111	da Silva, A. P.; Nascimento da Silva, L. C.; Martins da Fonseca, C. S.; de Araujo, J. M.; Correia, M. T.; Cavalcanti Mda, S.; Lima, V. L., Antimicrobial Activity and Phytochemical Analysis of Organic Extracts from Cleome spinosa Jaqc. Front. Microbiol. 2016, 7, 963.
112	da Silva, T. P. D.; Moura, V. M.; Souza, M. C. S.; Santos, V. N. C.; Silva, K.; Mendes, M. G. G.; Nunez, C. V.; Almeida, P. D. O.; Lima, E. S.; Mourao, R. H. V.; Dos-Santos, M. C., Connarus favosus Planch.: An Inhibitor of the Hemorrhagic Activity of Bothrops atrox Venom and a Potential Antioxidant and Antibacterial Agent. J. Ethnopharmacol. 2016, 183, 166-175.
113	da Silva, K. R.; Damasceno, J. L.; Inacio, M. O.; Abrao, F.; Ferreira, N. H.; Tavares, D. C.; Ambrosio, S. R.; Veneziani, R. C. S.; Martins, C. H. G., Antibacterial and Cytotoxic Activities of Pinus tropicalis and Pinus elliottii Resins and of the Diterpene Dehydroabietic Acid Against Bacteria That Cause Dental Caries. Front. Microbiol. 2019, 10, 987.
114	Daniel-Jambun, D.; Dwiyanto, J.; Lim, Y. Y.; Tan, J. B. L.; Muhamad, A.; Yap, S. W.; Lee, S. M., Investigation on the Antimicrobial Activities of Gingers (Etlingera coccinea (Blume) S.Sakai & Nagam and Etlingera sessilanthera R.M.Sm.) Endemic to Borneo. J. Appl. Microbiol. 2017, 123 (4), 810-818.
115	Daniel-Jambun, D.; Ong, K. S.; Lim, Y. Y.; Tan, J. B. L.; Yap, S. W.; Lee, S. M., Bactericidal and Cytotoxic Activity of a Diarylheptanoid (Etlingerin) Isolated from a Ginger (Etlingera pubescens) Endemic to Borneo. J. Appl. Microbiol. 2019, 127 (1), 59-67.
116	Dar, S. A.; Ganai, F. A.; Yousuf, A. R.; Balkhi, M. U.; Bhat, T. M.; Sharma, P., Pharmacological and Toxicological Evaluation of Urtica dioica. Pharm. Biol. 2013, 51 (2), 170-80.
[truncated: 367 more rows]
